# Supplementary material for: Identification of miRNAs and their targets in transgenic Brassica napus and its acceptor (Westar) by high-throughput sequencing and degradome analysis
Source: Royal Society of Chemistry journal article supplement (doi:10.1039/c5ra14672k), 2015-01-01
Supplement: c5ra14672k1.xlsx [file c5ra14672k1.xlsx]

## Sheet: Sheet1
Additional file 1: Table S1 - Overview of sRNA sequences in the WA and TG libraries
Type	WA		TG
	Total	Unique	Total	Unique
Raw reads	15287111	5162614	13084245	5031968
ADTs & Length[1]	2547807	1886044	2231351	2259174
Junk[2]	163917	30338	66513	21738
Rfam[3]	1259026	162547	1188353	159566
Repeats[4]	44932	12803	45265	16124
Clean reads	11285339	3073405	9574008	2579167
[1]ADTs & Length: adapters data or lengths with <17 and >25 nt
[2]Junk: ≥2N, ≥7A, ≥8C, ≥6G, ≥7T, ≥10Dimer, ≥6Trimer, ≥5Tetramer
[3]Rfam: Noncoding sRNAs except miRNAs; http://rfam.janelia.org
[4]Repeats: Prototypic sequences representing repetitive DNA from different eukaryotic species; http://www.girinst.org/repbase
