# Supplementary material for: Identification of miRNAs and their targets in transgenic Brassica napus and its acceptor (Westar) by high-throughput sequencing and degradome analysis
Source: Royal Society of Chemistry journal article supplement (doi:10.1039/c5ra14672k), 2015-01-01
Supplement: c5ra14672k2.xlsx [file c5ra14672k2.xlsx]

## Sheet: 10.1
Additional 10: Table S10.1 - The primers used for qRT-PCR verification
miRNA	Primer
bna-miR156e_R+1	GGCCTGACAGAAGAGAGTGAGCAC
bna-miR160a,b,c,d	GATGCCTGGCTCCCTGTATGC
bra-miR168b-3p,c-3p	CCCGCCTTGCATCAACTGAAT
ath-miR171-5p, bna-MIR171g-p5	GCGTATTGGCCTGGTTCACTCA
bna-miR390a,b,c	CCGCAAGCTCAGGAGGGATAG
bna-miR393_R+1	CGCTCCAAAGGGATCGCATT
bra-miR398-3p	GGCTGTGTTCTCAGGTCACCCC
ath-miR399c-3p	GGTGCCAAAGGAGAGTTGCCC
bra-miR5654a	CCAATAAATCCCAAGCATCATCCA
bna-miR6030	CCTCCACCCATACCATACAGACCC
PC-3p-72	CCGCAGAGTCGGGTTCTTATATTC
U6 snoRNA - F	GCTTCGGCAGCACATATACTAAAAT
U6 snoRNA - R	CGCTTCACGAATTTGCGTGTCAT

## Sheet: 10.2
Additional 10: Table S10.2 - qRT-PCR verification of unique miRNA sequences in the WA and TG lines
U6 snoRNA	Ct1	Ct2	Ct3	Average Ct	SD Ct	-	-	-
WA	25.65	25.59	25.69	25.6433	0.0503322
TG	25.27	25.47	25.47	25.4033	0.11547
bna-miR156e_R+1	Ct1	Ct2	Ct3	Average Ct	SD Ct	⊿Ct	⊿⊿Ct	2(-⊿⊿Ct)
WA	20.24	20.13	20.24	20.2033	0.0635085	-5.44	0	1
TG	20.2	20.12	20.27	20.1967	0.0750555	-5.20667	0.233333	0.850667
bna-miR160a,b,c,d	Ct1	Ct2	Ct3	Average Ct	SD Ct	⊿Ct	⊿⊿Ct	2(-⊿⊿Ct)
WA	21.96	21.98	21.96	21.9667	0.011547	-3.67667	0	1
TG	21.69	21.46	21.61	21.5867	0.116762	-3.81667	-0.14	1.10191
bra-miR168b-3p,c-3p	Ct1	Ct2	Ct3	Average Ct	SD Ct	⊿Ct	⊿⊿Ct	2(-⊿⊿Ct)
WA	23.62	23.87	23.59	23.6933	0.153731	-1.95	0	1
TG	22.48	22.57	22.79	22.6133	0.159478	-2.79	-0.84	1.79005
ath-miR171-5p, bna-MIR171g-p5	Ct1	Ct2	Ct3	Average Ct	SD Ct	⊿Ct	⊿⊿Ct	2(-⊿⊿Ct)
WA	22.89	22.97	22.84	22.9	0.0655744	-2.74333	0	1
TG	24.38	24.19	24.45	24.34	0.134536	-1.06333	1.68	0.312083
bna-miR390a,b,c	Ct1	Ct2	Ct3	Average Ct	SD Ct	⊿Ct	⊿⊿Ct	2(-⊿⊿Ct)
WA	23.17	23.43	23.26	23.2867	0.132035	-2.35667	0	1
TG	24.95	24.88	24.87	24.9	0.043589	-0.503333	1.85333	0.276752
bna-miR393_R+1	Ct1	Ct2	Ct3	Average Ct	SD Ct	⊿Ct	⊿⊿Ct	2(-⊿⊿Ct)
WA	28.47	28.71	28.82	28.6667	0.178979	3.02333	0	1
TG	27.96	27.99	27.91	27.9533	0.0404145	2.55	-0.473333	1.38831
bra-miR398-3p	Ct1	Ct2	Ct3	Average Ct	SD Ct	⊿Ct	⊿⊿Ct	2(-⊿⊿Ct)
WA	22.79	22.84	22.91	22.8467	0.0602771	-2.79667	0	1
TG	21.95	21.87	22.01	21.9433	0.0702377	-3.46	-0.663333	1.58374
ath-miR399c-3p	Ct1	Ct2	Ct3	Average Ct	SD Ct	⊿Ct	⊿⊿Ct	2(-⊿⊿Ct)
WA	22.64	22.32	22.54	22.5	0.163707	-3.14333	0	1
TG	23.38	23.31	23.46	23.3833	0.0750555	-2.02	1.12333	0.459032
bra-miR5654a	Ct1	Ct2	Ct3	Average Ct	SD Ct	⊿Ct	⊿⊿Ct	2(-⊿⊿Ct)
WA	22.98	23.15	23.19	23.1067	0.111505	-2.53667	0	1
TG	22.43	22.58	22.61	22.54	0.0964365	-2.86333	-0.326667	1.25411
bna-miR6030	Ct1	Ct2	Ct3	Average Ct	SD Ct	⊿Ct	⊿⊿Ct	2(-⊿⊿Ct)
WA	25.39	25.23	25.32	25.3133	0.0802081	-0.33	0	1
TG	25.28	25.08	24.98	25.1133	0.152753	-0.29	0.04	0.972655
PC-3p-72	Ct1	Ct2	Ct3	Average Ct	SD Ct	⊿Ct	⊿⊿Ct	2(-⊿⊿Ct)
WA	32.22	32.19	32.23	32.2133	0.0208167	6.57	0	1
TG	32.97	33.01	32.99	32.99	0.02	7.58667	1.01667	0.494257
