# Supplementary material for: Identification of miRNAs and their targets in transgenic Brassica napus and its acceptor (Westar) by high-throughput sequencing and degradome analysis
Source: Royal Society of Chemistry journal article supplement (doi:10.1039/c5ra14672k), 2015-01-01
Supplement: c5ra14672k3.xlsx [file c5ra14672k3.xlsx]

## Sheet: Sheet1
Additional file 2: Table S2.1 - Length distributions of Clean reads in the WA and TG libraries
Type	WA		TG
	Total	Unique	Total	Unique
17	338795	79527	185899	58738
18	426329	106039	275933	80158
19	471599	130482	344371	106708
20	582031	158630	533297	135665
21	2679800	348823	3421546	337659
22	1380252	264764	1407033	264947
23	1079091	429373	780809	373643
24	3916896	1457371	2348654	1133115
25	410546	98396	276466	88534

## Sheet: Sheet2
Additional file 2: Table S2.2 - Overview of Rfam data in the WA and TG libraries
Type	Total			Unique
	WA	TG	|Log2(WA/TG)|	WA	TG	|Log2(WA/TG)|
rRNA	904936	950913	0.0715	95761	96569	0.0121
tRNA	241781	148625	0.702	44531	37250	0.2576
snoRNA	13353	12734	0.0685	5251	5477	0.0608
snRNA	24098	22348	0.1088	5185	5068	0.0329
other Rfam RNA	74858	53733	0.4783	11819	15202	0.3632
