# Supplementary material for: Identification of miRNAs and their targets in transgenic Brassica napus and its acceptor (Westar) by high-throughput sequencing and degradome analysis
Source: Royal Society of Chemistry journal article supplement (doi:10.1039/c5ra14672k), 2015-01-01
Supplement: c5ra14672k4.xlsx [file c5ra14672k4.xlsx]

## Sheet: S3.1
Additional file 3: Table S3.1 - Conserved miRNAs which were mapped to B. napus pre-miRNAs and these pre-miRNAs were further mapped to B. napus genome in the WA and TG libraries
1. The reads were completely mapped to Brassicaceae miRNAs.
1.1. miRNAs belong to B. napus.
Sequence	Name[1]	Length	Type	WA Raw	TG Raw	WA Norm	TG Norm	rep MIR ID[2]	rep miR ID[3]	Genome ID	Strand	Start	End	pre-miRNA[4]	SS[5]	CG%	dG	MFEI[6]
TTGACAGAAGATAGAGAGCAC	bna-miR156b	21	5'	154	81	120	101	bna-MIR156b	bna-miR156b	chrAnn_random	-	12174312	12174519	taggtttgagagtgatgctggttgTTGACAGAAGATAGAGAGCACtaaggatgacatgcaagtacatatgtatgtatcatcacaccgcctgtggatgattacaaaaataaaaccaattcaaaagagagagagagagagcctgcatgtctactctttcgtGCTCTCTATACTTCTGTCACCaccattatttcttcttctttcttaccta	(((((..((((((((((.((((....(((((((((((((((((((.(((((.((((((((.((...(((...(((((((((.(((.....)))))))).))))...))).......(((......))).........)).))))))))...))))).))))))))))).)))))))))))).))))).........)))))..)))))	39.4	-75	0.9
	bna-miR156c	21	5'	154	81	120	101	bna-MIR156c	bna-miR156c	chrC01	-	33525634	33525788	gggagtgatgcaggttgTTGACAGAAGATAGAGAGCACtaaggatgacatgcaagtacaaggatataaggaaattcaagaaagagaggaaaaaagagcctgcatctttactcttttgtGCTCTCTATACTTCTGTCAATAccattatttattcct	((((((((....((.(((((((((((((((((((((((.((((((((.((((........((((........)))).........(((.........)))))))..))).))))).))))))))))).)))))))))))))).....))))))))	38.1	-55	0.9
	bna-miR156g	21	5'	154	81	120	101	bna-MIR156g	bna-miR156g	chrC06	+	29160212	29160331	aggcgttgatagtgTTGACAGAAGATAGAGAGCACagatgatgagatgcaatttggagcagcttgtatgcatcgtactcctttgtGCTCTCTAGTCTTCTGTCATCactcgttacttgcc	.((((.((((((((.(((((((((((((((((((((((.((...((((((....((.....))....))))))....)).))))))))))))).)))))))))).)))).))))..))))	45	-56.8	1.1
TGACAGAAGAGAGTGAGCAC	bna-miR156d	20	5'	377	65	291	81	bna-MIR156d	bna-miR156d	chrA01	+	2348648	2348757	cgcaaagaaacTGACAGAAGAGAGTGAGCACacaaaggcactttgcatgttcgatgcatttgcttctcttgcgtGCTCACTGCTCTATCTGTCAGGttccggcaccgatt	.((...(((.(((((((((((((((((((((.((((((((...(((((.....)))))..)))))...))).))))))))).)))).)))))))).)))..)).......	49.1	-50.6	0.9
	bna-miR156e	20	5'	377	65	291	81	bna-MIR156e	bna-miR156e	chrA08	-	11240418	11240536	gaaatgcaacagagaaaacTGACAGAAGAGAGTGAGCACTtgcaaggcactgttatgtgtcaataactttgcgtgtgcgtGCTCACCTCTCTTTCTGTCAGTtgcctgacttctcgctt	...........((((((((((((((((((((((((((((..(((..(((..(((((......)))))..))).)))..))))))).))))).))))))))))).......)))))....	46.2	-50.9	0.9
	bna-miR156f	20	5'	377	65	291	81	bna-MIR156f	bna-miR156f	chrA09_random	+	3467562	3467738	ttgtgagtgaatgagctggggcaaaagaaacacacagaaacTGACAGAAGAGAGTGAGCACacaaaagtaaattgcatatgttgcatttgcttctcttgcgtGCTCACTGCTCTTTCTGTCAGAttcccgtgctgatctctttggcctgtccttgttcctctttgtctcagtctctc	....(((.(((..((...((((.(((((..(((((.(((.(((((((((((((((((((((.(((((((((((.(((.....)))))))))))...))).))))))))).))).))))))))).)))..))).))...))))).))))...))..))))))................	45.2	-70.9	0.9
	bna-miR156a_R-1	20	5'	377	65	291	81	bna-MIR156a	bna-miR156a	chrA04_random	-	674113	674194	TGACAGAAGAGAGTGAGCACacaaaagtaatctgcatatactgcatttgcttctcttgcgtGCTCACTGCTCTTTCTGTCAG	((((((((((((((((((((.(((((((((..((((.....)))).))))))...))).))))))))).))))).)))))).	43.9	-40.2	1.1
TTTGGATTGAAGGGAGCTCTA	bna-miR159	21	3'	38338	14970	29676	18564	bna-MIR159	bna-miR159	chrC06	+	25305911	25306095	aagtagggctccttatagttcaaacgagagttcagcagggtaaagaaaAGCTGCTAAGCTATGAATCCCataagccctaatccttatttataaaaaggatttggttatatggcttacatatctcaggagctttaacttgccctttaattgcttttactcttcTTTGGATTGAAGGGAGCTCTAca	..((((((((((((..((((((((..(((((..((((((((((...((((((.((.((.((((....(((((((((..(((((((.........))))))).)))).)))))....)))).)).)).))))))...))))))......))))...)))))..))))))))..)))))))))))).	37.8	-74.7	1.1
TGCCTGGCTCCCTGTATGCCA	bna-miR160a	21	5'	134	295	104	366	bna-MIR160a	bna-miR160a	chrC04_random	+	966001	966127	tatgtgtagttgtataagatgtgtaTGCCTGGCTCCCTGTATGCCAtcctctaagctcatcgaccattgatgacctccgtgaatgGCGTATGAGGAGCCATGCATAttttcatatacatttacatac	..((((((..((((((.((...((((((.(((((((..(((((((((......((.(((((((...))))))).))......)))))))))..))))))).))))))..)).))))))..)))))).	42.5	-54.3	1
	bna-miR160b	21	5'	134	295	104	366	bna-MIR160b	bna-miR160b	chrA06	+	23507282	23507370	tcaTGCCTGGCTCCCTGTATGCCAcaagtagatattgattttggttgaaaaaatcagctgccagtggCGTACAAGGAGTCAAGCATGac	((((((.(((((((.((((((((((..((((...((((((((.......))))))))))))..)))))))))).))))))).)))))).	46.1	-47.3	1.2
	bna-miR160c	21	5'	134	295	104	366	bna-MIR160c	bna-miR160c	chrA03	+	21776662	21776776	gtgtgtgctcttatggtcgTGCCTGGCTCCCTGTATGCCAcaagtatataccgatctcgttacgaaatctgtggctagtgGCGTACAGAGTAGTCAAGCATGaccaaagcttttc	......(((....(((((((((.(((((..(((((((((((.(((...(((.(((.(((...))).))).)))))).)))))))))))...))))).))))))))).))).....	48.7	-48.9	0.9
	bna-miR160d	21	5'	134	295	104	366	bna-MIR160d	bna-miR160d	chrAnn_random	-	14523329	14523417	gtcaTGCCTGGCTCCCTGTATGCCAcaagtaaataccgatctcattatgaaatcggacactagtgGCGTACAGAGTAGTCAAGCATGac	(((((((.(((((..(((((((((((.(((.....(((((.((.....)).)))))..))).)))))))))))...))))).)))))))	47.2	-43.8	1
TCAATGCACTGAAAGTGACTA	bna-miR161	21	5'	87	49	67	61	bna-MIR161	bna-miR161	chrC05	+	20744862	20744992	tttattgcttcgaTCAATGCACTGAAAGTGACTAcaccaggatttgtttttaagtttttgctctcatctatatgataaagatgaaaattagcctctgatgtaGTCACTTTCAATGCGTTGATCatagcatg	.....((((..((((((((((.((((((((((((((.((((...........(((....))).((((((.........)))))).........)))).)))))))))))))).))))))))))..))))..	34.4	-51.9	1.2
TGGAGAAGCAGGGCACGTGCA	bna-miR164a	21	5'	130	120	100	149	bna-MIR164a	bna-miR164a	chrA05	-	181753	181844	cctccacgtTGGAGAAGCAGGGCACGTGCAaaccaacaaacacgagatctatctcatgtaatttgcacgtgctccactcctccaacatgagc	.(((...(((((((.((..(((((((((((((.......(((.((((....)))).)))..)))))))))))))..)).)))))))..))).	51.1	-39.7	0.8
TGGAGAAGCAGGGCACGTGCG	bna-miR164b	21	5'	22	25	17	30	bna-MIR164b	bna-miR164b	chrA02	+	22601610	22601720	ttacacttgcTGGAGAAGCAGGGCACGTGCGaacaaatgagatcgatcagtatatatgttgatcatattttcgCACGTGTTCTACTACTCCAACacgtgtgcctccccctc	.(((((.((.(((((.((.((..((((((((((..(((..((((((.((.......))))))))..)))))))))))))..)).)).))))).)).)))))..........	46.8	-45.1	0.9
	bna-miR164c	21	5'	22	25	17	30	bna-MIR164c	bna-miR164c	chrA09	+	1939192	1939282	aacacttgcTGGAGAAGCAGGGCACGTGCGaactaatgagagatctgtacatgttgatcatatttttgCACGTGTTCTACTACTCCAACac	......((.(((((.((.((..((((((((((...((((..(((........)))..))))...))))))))))..)).)).))))).)).	44	-34.4	0.9
	bna-miR164d	21	5'	22	25	17	30	bna-MIR164d	bna-miR164d	chrA06	-	19618607	19618716	gtatcacttgcTGGAGAAGCAGGGCACGTGCGaacaaatgagtttgagcagtacattttgatcaaatattcgCACGTGTTCTACTACTCCAACacgtgtatctccccttc	(((.(((.((.(((((.((.((..((((((((((.......((((((.(((......))).)))))).))))))))))..)).)).))))).)).)))))).........	45.5	-39.7	0.8
TCGGACCAGGCTTCATTCCCC	bna-miR166a	21	3'	169765	172548	131410	213973	bna-MIR166a	bna-miR166a	chrA04	+	18875013	18875148	ttgaggGGAATGTTGTTTGGCTCGAAGactctagcttatcatgttagatcttcttcgatttaatcgaatcaaacctccatgtttgagatctgatttaggattttagggtcgTCGGACCAGGCTTCATTCCCCccaa	(((.((((((((..(..(((..(((.((((((((...(((..((((((((...((((((...))))))((((((......))))))))))))))....))).)))))))).)))..)))..)..)))))))).)))	42.6	-55.1	1
	bna-miR166b	21	3'	169765	172548	131410	213973	bna-MIR166b	bna-miR166b	chrA06	-	23968788	23968914	gagccaaaagttcaggtggatgatgcttggctcgagaccattaaatatgatcattgtgatgttgataatgatgatgataatgaaaatgatgTCGGACCAGGCTTCATTCCCCtcaacttacacgttt	((((...(((((.(((.((((((.((((((..(((...((((...(((.(((((..(.((.......)).)..))))).)))..))))...)))..)))))).)))))).))).)))))....))))	40.2	-39.2	0.8
	bna-miR166c	21	3'	169765	172548	131410	213973	bna-MIR166c	bna-miR166c	chrC04	-	621080	621226	cttttgagggGAATGTTGTCTGGCTCGAggactctagctctatctactcatgttggatcctcttcgatctaatcgaatcaaacctctatgtttgagatctgattagggttttagtgtcgTCGGACCAGGCTTCATTCCCCccaatta	...(((.((((((((..((((((..(((.(((.(((((((((((.......((((((((......)))))))).((.((((((......))))))..)).)).))))))..))).))).)))..))))))..)))))))).)))...	44.9	-59.7	0.9
	bna-miR166d	21	3'	169765	172548	131410	213973	bna-MIR166d	bna-miR166d	chrA10	-	15244857	15244974	gtggtgcggtttagggttgagaGGACTGTTGTCTGGCTCGAGGtcatgaagaatgaaagctaaacctaaatgattcTCGGACCAGGCTTCATTCCCCccaacctttttatcgccatat	((((((......(((((((...(((.((..((((((..(((((((((..((..............))..)))).)))))..))))))..)).)))...))))))).....))))))..	47.5	-42.1	0.8
	bna-miR166e	21	3'	169765	172548	131410	213973	bna-MIR166e	bna-miR166e	chrA07	-	13453507	13453636	ttcttttgagGGGAATGTTGTCTGGCACGAGGcccttaacacagatctacgatcggttatatatataatatatgaacgatcaatttagtggttgatgacgTCGGACCAGGCTTCATTCCCCtcaattaca	.....((((((((((((..((((((..(((.....(((((.((.......(((((.((((((((...)))))))).))))).......))))))).....)))..))))))..)))))))))))).....	41.5	-49.4	0.9
TCGGACCAGGCTTCATCCCCC	bna-miR166f	21	3'	47505	48319	36772	59919	bna-MIR166f	bna-miR166f	chrA01	+	17152012	17152140	agttgaggGGAATGTTGTCTGGATCGAGGatattatatatacacaaatacgtatatatgttaatacaagtgtttgatcatatatgtatatagattattcTCGGACCAGGCTTCATCCCCCctaacatgt	.(((..((((.(((..((((((..((((((((...(((((((((((((((((((........))))..)))))))........))))))))...))))))))..))))))..))).))))..)))....	34.9	-48.5	1.1
TGAAGCTGCCAGCATGATCTA	bna-miR167a_R-1	21	5'	1109	518	858	642	bna-MIR167a	bna-miR167a	chrA01	-	16779527	16779658	ggtgtacaggcatctgaTGAAGCTGCCAGCATGATCTAattaactttctttctctgttgattttatgacaatggaaaagagatgagtgtcgattaGATCATGTTCGCAGTTTCACCcattgactgtcgcacc	(((((((((.((.....(((((((((.(((((((((((((..(((((((((.((..(((.((....)))))..))))))))).....))..))))))))))))).))))))))).....)).)))).)))))	41.7	-53.8	1
	bna-miR167b_R-1	21	5'	1109	518	858	642	bna-MIR167b	bna-miR167b	chrA05	-	11557588	11557711	ggcgcaccggcatctgaTGAAGCTGCCAGCATGATCTAattatctttctttctccgttgacgatggaaaagacatgagtgttgattaGATCATGTTCGCAGTTTCACCcgttgactgtctcgcc	((((...(((((.....(((((((((.(((((((((((((((.((((((((.((((((...)))))))))))...)))...))))))))))))))).))))))))).....)).)))...))))	47.6	-48.9	0.8
	bna-miR167c	21	5'	1109	518	858	642	bna-MIR167c	bna-miR167c	chrA03	+	18100976	18101107	ggtgcaccggcatctgaTGAAGCTGCCAGCATGATCTAgttaactttatttctccgttgtttatccatgacaatggaaaagggataagtgtcgattaGATCATGTTCGTAGTTTCACCcgttgactgtcgca	..(((..(((((.....(((((((((.(((((((((((((..(((((((..((((((((((.......)))))))))...)..))))).))..))))))))))))).))))))))).....)).)))..)))	43.9	-54	0.9
TCGCTTGGTGCAGGTCGGGAA	bna-miR168a	21	5'	2754	1474	2131	1828	bna-MIR168a	bna-miR168a	chrAnn_random	-	5900999	5901131	ttacggcggcctctgacTCGCTTGGTGCAGGTCGGGAActgattggctgacaccgccacgtggctttccatggttggcttgtgagcagggatCGGATCCCGCCTTGTATCAAGtgaatccgagtccgacgtga	(((((.(((.(((.((.((((((((((((((.(((((.((((((.(((.(((..(((((((((....)))))..)))).))).)))...)))))).))))).)))))))))))))).)).))).))).)))))	58.6	-69.3	0.9
CAGCCAAGGATGACTTGCCGA	bna-miR169a	21	5'	16	8	13	10	bna-MIR169a	bna-miR169a	chrC05	+	38305212	38305344	tgtgaccaaagtagtgtgCAGCCAAGGATGACTTGCCGAtttaaaatatctgataagtattttatttcgtattttaaagaaaaaaaatcatgatcGGCAAGTCGTCCTTGGCTATAcgtttctttgtgtcgcg	.((((((((((.(..((..((((((((((((((((((((((((((((((..((((((...))))))..))))))))..((.......))..))))))))))))))))))))))..))..).))))).))))).	36.8	-61	1.2
	bna-miR169b	21	5'	16	8	13	10	bna-MIR169b	bna-miR169b	chrC03	-	23196207	23196395	gtgaccaaagtagtgtgCAGCCAAGGATGACTTGCCGAtttgaaatatatttttaatactttactaagacatcttttcagtttcaaatttgtctttggagaggctatgaagaaattacaatttatttcgtattttaaagaaaaaatatgatcGGCAAGTTTTCCTTGGCTACAtctttctttgtgtcgc	((((((((((.((.(((.(((((((((..(((((((((((......((((((((....((((...((((((..(((........)))..))))))...))))..(((((((((((....)))).))))))).........)))))))))))))))))))..))))))))).)))))..))))).)))))	32.8	-63.9	1
TGAGCCAAAGATGACTTGCCG	bna-miR169m	21	5'	158	51	122	63	bna-MIR169m	bna-miR169m	chrC03	+	59573894	59574056	tatatgtatcagagagtcatgcatgggaaaatagagaatgataaTGAGCCAAAGATGACTTGCCGattttaccaaagaatttaaaactgataatggtgactgGCAAGTCGACTTTGGCTCTGtttccttctcttcttttcgatgtaagactctagatatctat	.....(((((..((((((.(((((.(((((..((((((.((....(((((((((..(((((((((...((((((...................)))))).)))))))))..)))))))))....)).))))))..))))).))))).)))))).)))))....	36.2	-67	1.1
CAGCCAAGGATGACTTGCCGG	bna-miR169n	21	5'	34	12	27	14	bna-MIR169n	bna-miR169n	chrC09	-	2448627	2448776	agaattgcttgaagtggagtagagtataatgCAGCCAAGGATGACTTGCCGGagggtcgttcatcatgcataataatattggtgatgaacataattcTGGCAAGTTGTCCTTCGGCTACattttgctctcttctactcatgcaaactctc	(((.((((.((.((((((..((((((.((((.(((((((((..(((((((((((....(((((((((.((.........)))))))))))....)))))))))))..))))).)))).)))).))))))..)))))))).))))..))).	42	-71.8	1.1
TGATTGAGCCGCGCCAATATC	bna-miR171f	21	3'	300	121	233	150	bna-MIR171f	bna-miR171f	chrA03	+	20691328	20691446	acgaaagagtcctctttgaTATTGGCCTGGTTCACTCAGAtcttccagattacacacgtactatatacattctctcagttatcTGATTGAGCCGCGCCAATATCtcagtgctctctcgt	((((.((((..((....(((((((((..((((((.((((((((...(((.....................)))...))..)))))).))))))..)))))))))..))..)))).))))	43.7	-39.7	0.8
	bna-miR171g	21	3'	300	121	233	150	bna-MIR171g	bna-miR171g	chrC07	+	35991388	35991467	gaTATTGGCCTGGTTCACTCAGAttacacacgtactatatgcattctcttagttatcTGATTGAGCCGCGCCAATATCtc	(((((((((..((((((.((((((.((........................)).)))))).))))))..)))))))))..	42.5	-29.3	0.9
AGAATCTTGATGATGCTGCAT	bna-miR172a	21	3'	771	553	597	686	bna-MIR172a	bna-miR172a	chrAnn_random	+	18710188	18710339	agctcatcagtcgttttttgtaggcGCAGCACCATCAAGATTCACAtggaaattgaaaaatctcctaatttttaattagggttttgatatgtatatgAGAATCTTGATGATGCTGCATcaacaaccgacggctatacacaatacctaaagct	........(((((((..((((.(..((((((.(((((((((((.((((...((...(((((..(((((((...))))))))))))...))...)))).))))))))))).))))))..).))))..)))))))...................	36.8	-50.3	0.9
GGAATCTTGATGATGCTGCAT	bna-miR172b	21	3'	41	25	32	30	bna-MIR172b	bna-miR172b	chrA03	-	4246407	4246501	tagttgcagatGCAGCATCATTAAGATTCACAagagatgtggttttcttgttttctcgcctcttgGGAATCTTGATGATGCTGCATcagcaacta	(((((((.(((((((((((((((((((((.((((((..(.((...........)).)..)))))).))))))))))))))))))))).)))))))	41.1	-53.5	1.4
	bna-miR172c	21	3'	41	25	32	30	bna-MIR172c	bna-miR172c	chrA02	-	3338510	3338647	cagccggtagttgcagatGCAGCATCATCAAGATTCACAagtgaagtggtttcctttgttttcgcctctccatccgaaaacaaagggttcttctcgaatgGGAATCTTGATGATGCTGCATcagcatatacatggcta	.((((((((..(((.(((((((((((((((((((((.((..(((.(..(..(((((((((((((..........)))))))))))))..)..))))..)).))))))))))))))))))))).)))..))).))))).	44.9	-72.2	1.2
AAGCTCAGGAGGGATAGCGCC	bna-miR390a	21	5'	1053	329	815	408	bna-MIR390a	bna-miR390a	chrAnn_random	-	17450093	17450236	atttcaggtgatgtagttgagaagtagctgtaAAGCTCAGGAGGGATAGCGCCatgtctcaccagtactatgaaatgtttgtatatctatattggCGCTATCCATCCTGAGTTCTatggcttcttcttgcttttatcctgagat	(((((((((((.((....((((((.(((..((.(((((((((.(((((((((((..........((((............))))........))))))))))).))))))))).))..))).))))))))..))).))))))))	41	-61.5	1
	bna-miR390b	21	5'	1053	329	815	408	bna-MIR390b	bna-miR390b	chrA04	+	16662818	16662922	gtagagaagaatctgtaAAGCTCAGGAGGGATAGCGCCatcatgatcacacacatcgatatttttggCGCTGTCCATCCTGAGTTTCattggctcttcttactac	((((((((((..(..(.((((((((((.(((((((((((.....(((.........))).....))))))))))).)))))))))).)..)..))))))..))))	44.8	-49.3	1
	bna-miR390c	21	5'	1053	329	815	408	bna-MIR390c	bna-miR390c	chrCnn_random	+	30336150	30336277	gcgtagtagagaagtagctgtaAAGCTCAGGAGGGATAGCGCCatgacgcatcaccattactatatgtctttgtatatgtaatggCGCTATCCATCCTGAGTTCCatggcttcttcttgctttaatgt	((((((((.(((((.(((..(..(((((((((.((((((((((((.(((((....(((......)))....)))....)).)))))))))))).)))))))))..)..))).)))))))))...))))	43.8	-55.6	1
CTGAAGTGTTTGGGGGAACTC	bna-miR395a	21	3'	3	8	3	10	bna-MIR395a	bna-miR395a	chrC08_random	-	3571194	3571286	atgtctcctagaGTTCCTCTGAGCACTTCATTGggtatacaatttcttatgaagattacccaCTGAAGTGTTTGGGGGAACTCctggacccat	(((..(((..(((((((((..(((((((((.((((((.....((((....))))..)))))).)))))))))..)))))))))..)))..)))	44.1	-49.2	1.2
	bna-miR395b	21	3'	3	8	3	10	bna-MIR395b	bna-miR395b	chrC06	-	31501912	31502000	tcctagaGTTCCTCTGAGCACTTCATTGgagataccgtttattttctatcaaaatgtattccaCTGAAGTGTTTGGGGGAACTCctgga	(((..(((((((((..(((((((((.(((((.(((.((((...........)))))))))))).)))))))))..)))))))))..)))	41.6	-42.7	1.2
	bna-miR395c	21	3'	3	8	3	10	bna-MIR395c	bna-miR395c	chrAnn_random	+	31837278	31837385	gtcggatgtttcctagaGTTCCTCTGAGCACTTCATTGgatataacattttctatcaaaaagaaatgtattctaCTGAAGTGTTTGGGGGAACTCctggactcattcg	..((((((..(((..(((((((((..(((((((((.((((....((((((.((.......))))))))..)))).)))))))))..)))))))))..)))..))))))	39.8	-51	1.2
TTAGATTCACGCACAAACTCG	bna-miR403	21	3'	10891	8065	8430	10001	bna-MIR403	bna-miR403	chrA05	-	283711	283821	agagaagagtcatattacaTGTTTTGTGCGTGAATCTAATTcgtatgctcatgtagtaatcctatcttgttgttggaTTAGATTCACGCACAAACTCGtaatctgtctttt	....(((((.((.(((((..(.(((((((((((((((((((((...((....((((.....))))...))...))))))))))))))))))))))..))))).)).)))))	35.1	-41.7	1.1
TAGACCATTTGTGAGAAGGGA	bna-miR824	21	5'	788	579	610	718	bna-MIR824	bna-miR824	chrA03	+	23971868	23972499	cctcgagttgtctttcatgtcTAGACCATTTGTGAGAAGGGAttttttgtttgcaccgtccaccccactctcaatctgtagtgagtattaaggaaaatagcttgttcaacatatcacactactcttttagaaacaaaactatattttagatgcttttccagcttgatatacgttgttttgttatgtatacctgtattctcccggctaccaaaacgttaagaaataaggtgaacatctccccaaaacctgcatccaattagaaaggtctaggtcacagccattacttgctatctctcgattaagctattttatttctatcatcatcatcagatcattcaggagttgagtataaaataaaatacattaagtccattcatgacatttctggatgctgcatac…	((((((((..(((..((..((((((((((..(((((((((((((........(((((.....((((((((((....(((((((((((....(((((..(((.................(((......)))........(((.....)))..)))))))).((..(((....(((.((((((((((.((((((.((.......(((..((((((......((((((.((.((.....)).)).......(((((((....(((.(((((.(((....))).......((((((....)))..)))........................))))).))).(((.((((((((........)))).)))).)))..............))))))).......…	38.1	-193.9	0.8
TCAATACATTGGACTACATAT	bna-miR860	21	3'	6	15	5	19	bna-MIR860	bna-miR860	chrA06	+	19255117	19255231	tggtcaagtgtaatgtaTGTAGTCCAATCTATTGAAGTactagcacaccatctctagtgagatgatgtggttgagtagtTCAATACATTGGACTACATATattacttttgatcaa	(((((((..(((((((((((((((((((.(((((((.((((..((((.((((((....)))))).))))....)))).))))))).)))))))))))))))))))..))))))).	34.8	-61.3	1.5
ACAGCCTAAACCAATCGGAGC	bna-miR1140	21	3'	8535	3041	6607	3771	bna-MIR1140	bna-miR1140	chrA03_random	-	242834	243008	tcccctgttctctcaatcttttatatggcTCCGATTGGCTTTAGGCTGTTgtggctttgacttctttctaaagtcttcaaaatttagtttttcacaatcacgttaaatttttttaaaagtcacagccacaACAGCCTAAACCAATCGGAGCcatggtgatgagttcttgtaaggg	..((((.....(((.(((.....(((((((((((((((.(((((((((((((((((.((((((....(((((..........)))))..(((.((......)).))).........)))))).))))))))))))))))))))))))))))))))..))))))........))))	38.9	-76	1.1
TGGGGTTGTGATTTCAGGCTT	bna-miR6029	21	3'	264	302	204	375	bna-MIR6029	bna-miR6029	chrA05	+	19856632	19856747	aagagatacacaagccaaGCCTCAAATAAACAATCCCAACagattacaaatcatttggccttgaatttcatttgtaatatgtTGGGGTTGTGATTTCAGGCTTggcttgtgtatct	...(((((((((((((((((((.((((..((((((((((((.(((((((((.((((......))))...))))))))).)))))))))))).)))).)))))))))))))))))))	37.1	-62.3	1.4
TCCACCCATACCATACAGACCC	bna-miR6030	22	3'	120	298	93	370	bna-MIR6030	bna-miR6030	chrA06	+	9009584	9009696	tcagggattaagtGTCTGTATGTGTGGGCTGAGTaggcacaatcacagcttttactcagatctggttgtgaatggaccttcTCCACCCATACCATACAGACCCttaatcctga	...(((((((((.(((((((((((((((..(((.(((..((.((((((((.............)))))))).))..))).)))..)))))).))))))))).)))))))))..	46	-55.6	1.1
AAGAGGTTCGGAGCGGTTTGAAGC	bna-miR6031	24	5'	484	95	375	118	bna-MIR6031	bna-miR6031	chrA02	-	12939998	12940068	tAAGAGGTTCGGAGCGGTTTGAAGCgatttatagcggtttgtatgatTGTTTCGAAACGCTGTCAACCGCT	..((.((((.((((((.(((((((((((((((((....))))).)))))))))))).)))).)))))).))	45.1	-23.3	0.7
1.2. miRNAs belong to other species in Brassicaceae.
Sequence	Name	Length	Type	WA Raw	TG Raw	WA Norm	TG Norm	rep MIR ID	rep miR ID	Genome ID	Strand	Start	End	pre-miRNA	SS	CG%	dG	MFEI
GGAATGTTGTCTGGCTCGAGG	aly-miR166a-5p	21	5'	4921	2034	3809	2522	bna-MIR166c	aly-miR166a-5p	chrC04	-	621080	621226	cttttgagggGAATGTTGTCTGGCTCGAggactctagctctatctactcatgttggatcctcttcgatctaatcgaatcaaacctctatgtttgagatctgattagggttttagtgtcgTCGGACCAGGCTTCATTCCCCccaatta	...(((.((((((((..((((((..(((.(((.(((((((((((.......((((((((......)))))))).((.((((((......))))))..)).)).))))))..))).))).)))..))))))..)))))))).)))...	44.9	-59.7	0.9
AGATATTAGTGCGGTTCAATC	bna-MIR171a-p5	21	5'	349	127	270	158	bna-MIR171a		chrA09	+	32027177	32027280	tggtcaagcgAGATATTAGTGCGGTTCAATCaaatagtctcactcttagttgatagagattgattttgttcgaTTGAGCCGTGCCAATATCACGcatataacca	.(((...(((.((((((.(..((((((((((.(((((..(((.((((........)))).)))..))))).))))))))))..).)))))).))).....))).	39.4	-41.8	1
	bna-MIR171b-p5	21	5'	349	127	270	158	bna-MIR171b		chrA06	-	3898716	3898816	ggtaacgcgAGATATTAGTGCGGTTCAATCaaatagtcgtgttctcacttgatagagatcggttttgttcgaTTGAGCCGTGCCAATATCACGcgtcaacc	(((.(((((.((((((.(..((((((((((.(((((...((.((((........)))).))...))))).))))))))))..).)))))).)))))..)))	45.5	-43.5	0.9
	aly-miR171b-5p	21	5'	349	127	270	158	bna-MIR171c	aly-miR171b-5p	chrA08	+	17378054	17378176	atgtaaaggtaacgcgAGATATTAGTGCGGTTCAATCaaatagtcgtactcttagctattagagatcggttttgttcgaTTGAGCCGTGCCAATATCACGcataaaaccaacatggcaaagat	((((...(((...(((.((((((.(..((((((((((.((((((((..((((........))))..)))..))))).))))))))))..).)))))).))).....))).)))).........	39.8	-40.6	0.8
TATTGGCCTGGTTCACTCAGA	ath-miR171-5p	21	5'	160	16	124	19	bna-MIR171f	ath-miR171-5p	chrA03	+	20691328	20691446	acgaaagagtcctctttgaTATTGGCCTGGTTCACTCAGAtcttccagattacacacgtactatatacattctctcagttatcTGATTGAGCCGCGCCAATATCtcagtgctctctcgt	((((.((((..((....(((((((((..((((((.((((((((...(((.....................)))...))..)))))).))))))..)))))))))..))..)))).))))	43.7	-39.7	0.8
	bna-MIR171g-p5	21	5'	160	16	124	19	bna-MIR171g		chrC07	+	35991388	35991467	gaTATTGGCCTGGTTCACTCAGAttacacacgtactatatgcattctcttagttatcTGATTGAGCCGCGCCAATATCtc	(((((((((..((((((.((((((.((........................)).)))))).))))))..)))))))))..	42.5	-29.3	0.9
GCAGCACCATCAAGATTCACA	aly-miR172b-5p	21	5'	141	109	109	135	bna-MIR172a	aly-miR172b-5p	chrAnn_random	+	18710188	18710339	agctcatcagtcgttttttgtaggcGCAGCACCATCAAGATTCACAtggaaattgaaaaatctcctaatttttaattagggttttgatatgtatatgAGAATCTTGATGATGCTGCATcaacaaccgacggctatacacaatacctaaagct	........(((((((..((((.(..((((((.(((((((((((.((((...((...(((((..(((((((...))))))))))))...))...)))).))))))))))).))))))..).))))..)))))))...................	36.8	-50.3	0.9
GTTCAATAAAGCTGTGGGAAG	ath-miR396a-3p	21	3'	568	365	440	453	bna-MIR396a	ath-miR396a-3p	chrC09	+	5300029	5300181	ctctctgtattcTTCCACAGCTTTCTTGAACTGcaaccttcttcagattagtttctattctcacatatatattaccatagcatagttatgttaatttaaattgcatctgttcgactgatttgcgGTTCAATAAAGCTGTGGGAAGatacagac	...(((((((..((((((((((((.(((((((((((...((..(((((((((((................((((.((((((...)))))).))))..)))))).)))))...)).....))))))))))).))))))))))))..))))))).	35.3	-53.6	1
GTTCCTCTGAGCACTTCATTG	bra-miR395a-5p	21	5'	30	59	23	74	bna-MIR395a	bra-miR395a-5p	chrC08_random	-	3571194	3571286	atgtctcctagaGTTCCTCTGAGCACTTCATTGggtatacaatttcttatgaagattacccaCTGAAGTGTTTGGGGGAACTCctggacccat	(((..(((..(((((((((..(((((((((.((((((.....((((....))))..)))))).)))))))))..)))))))))..)))..)))	44.1	-49.2	1.2
	bna-MIR395b-p5	21	5'	30	59	23	74	bna-MIR395b		chrC06	-	31501912	31502000	tcctagaGTTCCTCTGAGCACTTCATTGgagataccgtttattttctatcaaaatgtattccaCTGAAGTGTTTGGGGGAACTCctgga	(((..(((((((((..(((((((((.(((((.(((.((((...........)))))))))))).)))))))))..)))))))))..)))	41.6	-42.7	1.2
	bra-miR395d-5p	21	5'	30	59	23	74	bna-MIR395c	bra-miR395d-5p	chrAnn_random	+	31837278	31837385	gtcggatgtttcctagaGTTCCTCTGAGCACTTCATTGgatataacattttctatcaaaaagaaatgtattctaCTGAAGTGTTTGGGGGAACTCctggactcattcg	..((((((..(((..(((((((((..(((((((((.((((....((((((.((.......))))))))..)))).)))))))))..)))))))))..)))..))))))	39.8	-51	1.2
GACCTCAGGATGCGGATTACC	bra-miR2111-3p	21	3'	28	17	22	21	bna-MIR2111c	bra-miR2111-3p	chrC01	-	37890088	37890224	tattggtGAGGACCGGGTAATCTGCATCctggggtttaaggtttaagtacacgcaaaaatatgcgtacgcatatatttgtgtgtgttagtatagcttttaGACCTCAGGATGCGGATTACCtcttccttacaatacg	.....(((((((..((((((((((((((((((((((((((((((((.((((((((((.((((((....)))))).)))))))))))))....))).))))))))))))))))))))))))))..)))))))......	41.6	-74.2	1.3
2. The reads were almost mapped to Brassicaceae miRNAs.
2.1. miRNAs belong to B. napus.
Sequence	Name	Length	Type	WA Raw	TG Raw	WA Norm	TG Norm	rep MIR ID	rep miR ID	Genome ID	Strand	Start	End	pre-miRNA	SS	CG%	dG	MFEI
TGACAGAAGAGAGTGAGCACT	bna-miR156e_R+1	21	5'	4517	554	3496	687	bna-MIR156e	bna-miR156e	chrA08	-	11240418	11240536	gaaatgcaacagagaaaacTGACAGAAGAGAGTGAGCACTtgcaaggcactgttatgtgtcaataactttgcgtgtgcgtGCTCACCTCTCTTTCTGTCAGTtgcctgacttctcgctt	...........((((((((((((((((((((((((((((..(((..(((..(((((......)))))..))).)))..))))))).))))).))))))))))).......)))))....	46.2	-50.9	0.9
TAGCCAAGGATGACTTGCCTG	bna-miR169g_R-1	21	5'	16	10	12	12	bna-MIR169g	bna-miR169g	chrA06	-	7076255	7076435	catataaagagaaacggtgacatgaagaatgagaagttgtgtggTAGCCAAGGATGACTTGCCTGcgtctttaacaccatatcaaagactttatcgatagtctctgagttggttaggctgtaGGCAGTCTCCTTGGCTATTcagacactcctctttctcctcatttcacatttctcttttt	.....(((((((((..((((.((((((((.(((.((.(((.(((((((((((((.((((.((((((((((.....((((..(((.(((((........))))).)))..)))).)))).))))))))))))))))))))).)).))))).))).))))..)))).)))).)))))))))..	41.4	-79.1	1.1
	bna-miR169h_R-1	21	5'	16	10	12	12	bna-MIR169h	bna-miR169h	chrC08	+	33856449	33856624	gagaaatggtgacatgaagaatgagaagttgtgtggTAGCCAAGGATGACTTGCCTGcgtcttagaccatatctatcaaagactaaaagattgatagtcttcgatgaattggttaatcggtaGGCAGTCTCCTCGGCTATTcagacagttctctttctcctcatttcacatttctc	((((((((.(((.((((((((.(((((.((((.((((((((.((((.((((.((((((......(((((..((.(((.(((((((.........))))))).)))))..))))).....)))))))))))))).))))).))).))))))))).))))..)))).)))))))))))	41.5	-73.9	1
	bna-miR169i_R-1	21	5'	16	10	12	12	bna-MIR169i	bna-miR169i	chrC02	-	39445460	39445633	agagtcatgtttagTAGCCAAGGATGACTTGCCTGctctttttcacctccatgattcaattttatgtacagttttggattactatgcttctaaagagtatagtaattcaaaatcttgttgaatctttgtgggtaacagtttcaGGCAGTCTCCTTGGCTATCttgacatgcttt	((((.((((((..(((((((((((.(((.((((((..((.((..(((..((.((((((((..........(((((((((((((((((((.....)))))))))))))))))))...))))))))..))..))))).))...))))))))))))))))))))...))))))))))	36.8	-73.7	1.2
	bna-miR169j_R-1	21	5'	16	10	12	12	bna-MIR169j	bna-miR169j	chrA06	+	21693246	21693444	catggcgaaaagagtcgtgtttagTAGCCAAGGATGACTTGCCTGctcttgttcacctccacgattcaactttatacgttgaagggttttggattattgtgcattcaacatgtataataatttgaaatcatgttgaatctttgtgggttaggtttcaGGCAGTCTCCTTGGCTATTttgacatacttttttcatccatg	(((((.(((((((((.(((((.((((((((((((.(((.((((((..((((...(((..((.((((((((.(((.....)))..(((((..(((((((((((((.....)))))))))))))..)))))..))))))))..))..)))))))...)))))))))))))))))))))..))))))))))))))..)))))	38.7	-86.6	1.1
	bna-miR169k_R-1	21	5'	16	10	12	12	bna-MIR169k	bna-miR169k	chrA06	-	7217956	7218110	aaacggtgacatgaagaatgagaagttgtgtggTAGCCAAGGATGACTTGCCTGcgtcttaacaccatatcacagactttatcgatagtctctgagttggttaggctgtaGGCAGTCTCCTCGGCTATTcagacactcctctttctcctcatttc	.......((.((((((((.(((.((.(((.((((((((.((((.(((.(((((((((((....((((..(((.(((((........))))).)))..)))).)))).)))))))))))))).)))))).)).))))).))).))))..)))).))	45.8	-61.2	0.9
CAGCCAAGGATGACTTGCCGGAGG	bna-miR169n_R+3	24	5'	18	8	14	9	bna-MIR169n	bna-miR169n	chrC09	-	2448627	2448776	agaattgcttgaagtggagtagagtataatgCAGCCAAGGATGACTTGCCGGagggtcgttcatcatgcataataatattggtgatgaacataattcTGGCAAGTTGTCCTTCGGCTACattttgctctcttctactcatgcaaactctc	(((.((((.((.((((((..((((((.((((.(((((((((..(((((((((((....(((((((((.((.........)))))))))))....)))))))))))..))))).)))).)))).))))))..)))))))).))))..))).	42	-71.8	1.1
TGATTGAGCCGCGTCAATATC	bna-miR171f_1ss12TC	21	3'	492	173	381	214	bna-MIR171f	bna-miR171f	chrA03	+	20691328	20691446	acgaaagagtcctctttgaTATTGGCCTGGTTCACTCAGAtcttccagattacacacgtactatatacattctctcagttatcTGATTGAGCCGCGCCAATATCtcagtgctctctcgt	((((.((((..((....(((((((((..((((((.((((((((...(((.....................)))...))..)))))).))))))..)))))))))..))..)))).))))	43.7	-39.7	0.8
	bna-miR171g_1ss12TC	21	3'	492	173	381	214	bna-MIR171g	bna-miR171g	chrC07	+	35991388	35991467	gaTATTGGCCTGGTTCACTCAGAttacacacgtactatatgcattctcttagttatcTGATTGAGCCGCGCCAATATCtc	(((((((((..((((((.((((((.((........................)).)))))).))))))..)))))))))..	42.5	-29.3	0.9
AGAATCTTGATGATGCTGCA	bna-miR172a_R-1	20	3'	42	41	32	51	bna-MIR172a	bna-miR172a	chrAnn_random	+	18710188	18710339	agctcatcagtcgttttttgtaggcGCAGCACCATCAAGATTCACAtggaaattgaaaaatctcctaatttttaattagggttttgatatgtatatgAGAATCTTGATGATGCTGCATcaacaaccgacggctatacacaatacctaaagct	........(((((((..((((.(..((((((.(((((((((((.((((...((...(((((..(((((((...))))))))))))...))...)))).))))))))))).))))))..).))))..)))))))...................	36.8	-50.3	0.9
	bna-miR172d_R-1	20	3'	42	41	32	51	bna-MIR172d	bna-miR172d	chrA09	+	25644924	25645075	ttcagactttgaagcagttgcagtcattttttgctattgcatcatcatcaagattcagaaatcatattccttgatgggttctccttcgagcctgtcttttttggtttgAGAATCTTGATGATGCTGCAgcggcgattaaatggcttttttat	.............((....)).(((((((.((((..(((((.((((((((((((((..((((((........((..(((((......)))))..)).....))))))..)))))))))))))).)))))..))))..)))))))........	38.2	-58.1	1
TCCAAAGGGATCGCATTGATCC	bna-miR393_R+1	22	5'	72	115	56	143	bna-MIR393	bna-miR393	chrA07	+	14102817	14102946	TCCAAAGGGATCGCATTGATCCtaatcaagctgagttattcccgaataattattttaaacttttctcaatggaaagatagaaaaaaaaaaaagatttgcttcgttttccggatcatgcgatctcttcgga	(((.((((((((((((.(((((.((..((((..(((((((....))))))).(((((..((((((.....)))))).)))))...............))))..))....))))))))))))))))).)))	34.6	-38.4	0.9
TTTGGCATTCTGTCCACCTCC	bna-miR394a_L+1	21	5'	140	74	108	92	bna-MIR394a	bna-miR394a	chrA07	+	22459653	22459767	acagagttcTTTGGCATTCTGTCCACCTCCtttctgaatatatttgtgtataagtgtacgcaactacgttgtgttttgtgtgaggaggtgggcatactgccaatagagatctgtt	(((((..(((((((((...(((((((((((((...(((((((.((((((((....))))))))......))))))).....)))))))))))))...)))))).)))..))))).	41.7	-49	1
	bna-miR394b_L+1	21	5'	140	74	108	92	bna-MIR394b	bna-miR394b	chrA07	-	16633020	16633131	ttacagagatcTTTGGCATTCTGTCCACCTCCcctacctatgtatatgtgtattatctacgttgtgttttgtgagggggaggtgggcatactgccaacagagatctgttagg	..(((((..(((((((((...((((((((((((((((..(..((.(((((.......)))))))..)...))..))))))))))))))...)))))).)))..)))))....	45.5	-48.7	1
TTCCACAGCTTTCTTGAACTG	bna-miR396a_1ss21TG	21	5'	28939	19646	22401	24363	bna-MIR396a	bna-miR396a	chrC09	+	5300029	5300181	ctctctgtattcTTCCACAGCTTTCTTGAACTGcaaccttcttcagattagtttctattctcacatatatattaccatagcatagttatgttaatttaaattgcatctgttcgactgatttgcgGTTCAATAAAGCTGTGGGAAGatacagac	...(((((((..((((((((((((.(((((((((((...((..(((((((((((................((((.((((((...)))))).))))..)))))).)))))...)).....))))))))))).))))))))))))..))))))).	35.3	-53.6	1
TGCCAAAGGAGAGTTGCCCGG	bna-miR399a_1ss13TG	21	3'	15	6	11	7	bna-MIR399a	bna-miR399a	chrC05	+	16119891	16120040	gtgagatatatcaaaggtggaaatgcattacaGGGCAAGATCTCTATTGGCAgaaaaccattacttagatctttgcatctctttctgcattgatttgtagtgagttctcTGCCAAAGGAGATTTGCCCGGtaattcttctgcaccaatat	.(((......)))..((((.......(((((.((((.(((((((..((((((((.(((((((((..(((((..((((........))))..))))))))))).))).))))))))..))))))))))).))))).......)))).....	39.3	-58.3	1
	bna-miR399b_1ss13TG	21	3'	15	6	11	7	bna-MIR399b	bna-miR399b	chrCnn_random	+	44279926	44280044	aaatgcattacaGGGCAAGATCTCTATTGGCAGGaaaccattacttgacctttgcatctctttatgcattgttttgtagtgagttctcTGCCAAAGGAGATTTGCCCGGtaattcttct	......(((((.((((.(((((((..(((((((..(((((((((..(((...(((((......)))))..)))..)))))).)))..)))))))..))))))))))).)))))......	40.3	-52.5	1.1
TGGAGAGTAAGGACATTCAGATC	bna-miR6028_R+2	23	5'	227	58	176	72	bna-MIR6028	bna-miR6028	chrA05_random	-	1570345	1570475	acaagcacggttgggatgaTGGAGAGTAAGGACATTCAGATCtgcgaagcttatggtcccgtaacttttaaaatggattgggtgtttgagtttgttgaccTGAATGTCTTTCTCTTCATCaaaactgcctc	........(((.....((((((((((.((((((((((((.((..(.(((((((....((((...((........))..))))....))))))))..)).)))))))))))))))))))))).....)))..	42.7	-49	0.9
2.2. miRNAs belong to other species in Brassicaceae.
Sequence	Name	Length	Type	WA Raw	TG Raw	WA Norm	TG Norm	rep MIR ID	rep miR ID	Genome ID	Strand	Start	End	pre-miRNA	SS	CG%	dG	MFEI
GCTCACTGCTCTTTCTGTCAGA	bra-miR156f-3p_L-1	22	3'	14	9	10	11	bna-MIR156f	bra-miR156f-3p	chrA09_random	+	3467562	3467738	ttgtgagtgaatgagctggggcaaaagaaacacacagaaacTGACAGAAGAGAGTGAGCACacaaaagtaaattgcatatgttgcatttgcttctcttgcgtGCTCACTGCTCTTTCTGTCAGAttcccgtgctgatctctttggcctgtccttgttcctctttgtctcagtctctc	....(((.(((..((...((((.(((((..(((((.(((.(((((((((((((((((((((.(((((((((((.(((.....)))))))))))...))).))))))))).))).))))))))).)))..))).))...))))).))))...))..))))))................	45.2	-70.9	0.9
CGCTGTCCATCCTGAGTTTC	ath-miR390a-3p_R-1_1ss5AG	20	3'	705	841	546	1043	bna-MIR390b	ath-miR390a-3p	chrA04	+	16662818	16662922	gtagagaagaatctgtaAAGCTCAGGAGGGATAGCGCCatcatgatcacacacatcgatatttttggCGCTGTCCATCCTGAGTTTCattggctcttcttactac	((((((((((..(..(.((((((((((.(((((((((((.....(((.........))).....))))))))))).)))))))))).)..)..))))))..))))	44.8	-49.3	1
3. The reads were not mapped to Brassicaceae miRNAs.
3.1. The reads were completely mapped to B. napus pre-miRNAs.
Sequence	Name	Length	Type	WA Raw	TG Raw	WA Norm	TG Norm	rep MIR ID	rep miR ID	Genome ID	Strand	Start	End	pre-miRNA	SS	CG%	dG	MFEI
GCTCTCTATACTTCTGTCACC	bna-MIR156b-p3	21	3'	162	116	125	143	bna-MIR156b		chrAnn_random	-	12174312	12174519	taggtttgagagtgatgctggttgTTGACAGAAGATAGAGAGCACtaaggatgacatgcaagtacatatgtatgtatcatcacaccgcctgtggatgattacaaaaataaaaccaattcaaaagagagagagagagagcctgcatgtctactctttcgtGCTCTCTATACTTCTGTCACCaccattatttcttcttctttcttaccta	(((((..((((((((((.((((....(((((((((((((((((((.(((((.((((((((.((...(((...(((((((((.(((.....)))))))).))))...))).......(((......))).........)).))))))))...))))).))))))))))).)))))))))))).))))).........)))))..)))))	39.4	-75	0.9
GCTCTCTATACTTCTGTCAATA	bna-MIR156c-p3	22	3'	21	3	16	3	bna-MIR156c		chrC01	-	33525634	33525788	gggagtgatgcaggttgTTGACAGAAGATAGAGAGCACtaaggatgacatgcaagtacaaggatataaggaaattcaagaaagagaggaaaaaagagcctgcatctttactcttttgtGCTCTCTATACTTCTGTCAATAccattatttattcct	((((((((....((.(((((((((((((((((((((((.((((((((.((((........((((........)))).........(((.........)))))))..))).))))).))))))))))).)))))))))))))).....))))))))	38.1	-55	0.9
GCTCACCTCTCTTTCTGTCAGT	bna-MIR156e-p3	22	3'	144	141	111	175	bna-MIR156e		chrA08	-	11240418	11240536	gaaatgcaacagagaaaacTGACAGAAGAGAGTGAGCACTtgcaaggcactgttatgtgtcaataactttgcgtgtgcgtGCTCACCTCTCTTTCTGTCAGTtgcctgacttctcgctt	...........((((((((((((((((((((((((((((..(((..(((..(((((......)))))..))).)))..))))))).))))).))))))))))).......)))))....	46.2	-50.9	0.9
AGCTGCTAAGCTATGAATCCC	bna-MIR159-p5	21	5'	1392	381	1078	472	bna-MIR159		chrC06	+	25305911	25306095	aagtagggctccttatagttcaaacgagagttcagcagggtaaagaaaAGCTGCTAAGCTATGAATCCCataagccctaatccttatttataaaaaggatttggttatatggcttacatatctcaggagctttaacttgccctttaattgcttttactcttcTTTGGATTGAAGGGAGCTCTAca	..((((((((((((..((((((((..(((((..((((((((((...((((((.((.((.((((....(((((((((..(((((((.........))))))).)))).)))))....)))).)).)).))))))...))))))......))))...)))))..))))))))..)))))))))))).	37.8	-74.7	1.1
GCGTACAGAGTAGTCAAGCATG	bna-MIR160c-p3	22	3'	75	27	58	33	bna-MIR160c		chrA03	+	21776662	21776776	gtgtgtgctcttatggtcgTGCCTGGCTCCCTGTATGCCAcaagtatataccgatctcgttacgaaatctgtggctagtgGCGTACAGAGTAGTCAAGCATGaccaaagcttttc	......(((....(((((((((.(((((..(((((((((((.(((...(((.(((.(((...))).))).)))))).)))))))))))...))))).))))))))).))).....	48.7	-48.9	0.9
	bna-MIR160d-p3	22	3'	75	27	58	33	bna-MIR160d		chrAnn_random	-	14523329	14523417	gtcaTGCCTGGCTCCCTGTATGCCAcaagtaaataccgatctcattatgaaatcggacactagtgGCGTACAGAGTAGTCAAGCATGac	(((((((.(((((..(((((((((((.(((.....(((((.((.....)).)))))..))).)))))))))))...))))).)))))))	47.2	-43.8	1
GTCACTTTCAATGCGTTGATC	bna-MIR161-p3	21	3'	1240	660	960	818	bna-MIR161		chrC05	+	20744862	20744992	tttattgcttcgaTCAATGCACTGAAAGTGACTAcaccaggatttgtttttaagtttttgctctcatctatatgataaagatgaaaattagcctctgatgtaGTCACTTTCAATGCGTTGATCatagcatg	.....((((..((((((((((.((((((((((((((.((((...........(((....))).((((((.........)))))).........)))).)))))))))))))).))))))))))..))))..	34.4	-51.9	1.2
GGAGGCAGCGGTTGATCGATC	bna-MIR162a-p5	21	5'	311	73	241	91	bna-MIR162a		chrA10	+	15379854	15379963	aaagatgctGGAGGCAGCGGTTGATCGATCtctttgtgggaatttttgaaaaacaaaattaaaagcatgaacagaTCGATAAACCTCTGCATCCAGcggtcgcctcttca	...(((((((((.((((.((((.((((((((.((..((.....(((((.....))))).......))..)).)))))))).)))).)))).))))))).)).........	42.7	-41.9	0.9
CACGTGTTCTACTACTCCAAC	bna-MIR164b-p3	21	3'	24	13	19	16	bna-MIR164b		chrA02	+	22601610	22601720	ttacacttgcTGGAGAAGCAGGGCACGTGCGaacaaatgagatcgatcagtatatatgttgatcatattttcgCACGTGTTCTACTACTCCAACacgtgtgcctccccctc	.(((((.((.(((((.((.((..((((((((((..(((..((((((.((.......))))))))..)))))))))))))..)).)).))))).)).)))))..........	46.8	-45.1	0.9
	bna-MIR164c-p3	21	3'	24	13	19	16	bna-MIR164c		chrA09	+	1939192	1939282	aacacttgcTGGAGAAGCAGGGCACGTGCGaactaatgagagatctgtacatgttgatcatatttttgCACGTGTTCTACTACTCCAACac	......((.(((((.((.((..((((((((((...((((..(((........)))..))))...))))))))))..)).)).))))).)).	44	-34.4	0.9
	bna-MIR164d-p3	21	3'	24	13	19	16	bna-MIR164d		chrA06	-	19618607	19618716	gtatcacttgcTGGAGAAGCAGGGCACGTGCGaacaaatgagtttgagcagtacattttgatcaaatattcgCACGTGTTCTACTACTCCAACacgtgtatctccccttc	(((.(((.((.(((((.((.((..((((((((((.......((((((.(((......))).)))))).))))))))))..)).)).))))).)).)))))).........	45.5	-39.7	0.8
GGAATGTTGTTTGGCTCGAAG	bna-MIR166a-p5	21	5'	332	110	257	136	bna-MIR166a		chrA04	+	18875013	18875148	ttgaggGGAATGTTGTTTGGCTCGAAGactctagcttatcatgttagatcttcttcgatttaatcgaatcaaacctccatgtttgagatctgatttaggattttagggtcgTCGGACCAGGCTTCATTCCCCccaa	(((.((((((((..(..(((..(((.((((((((...(((..((((((((...((((((...))))))((((((......))))))))))))))....))).)))))))).)))..)))..)..)))))))).)))	42.6	-55.1	1
GGACTGTTGTCTGGCTCGAGG	bna-MIR166d-p5	21	5'	971	519	751	643	bna-MIR166d		chrA10	-	15244857	15244974	gtggtgcggtttagggttgagaGGACTGTTGTCTGGCTCGAGGtcatgaagaatgaaagctaaacctaaatgattcTCGGACCAGGCTTCATTCCCCccaacctttttatcgccatat	((((((......(((((((...(((.((..((((((..(((((((((..((..............))..)))).)))))..))))))..)).)))...))))))).....))))))..	47.5	-42.1	0.8
GATCATGTTCGCAGTTTCACC	bna-MIR167a-p3	21	3'	679	640	526	793	bna-MIR167a		chrA01	-	16779527	16779658	ggtgtacaggcatctgaTGAAGCTGCCAGCATGATCTAattaactttctttctctgttgattttatgacaatggaaaagagatgagtgtcgattaGATCATGTTCGCAGTTTCACCcattgactgtcgcacc	(((((((((.((.....(((((((((.(((((((((((((..(((((((((.((..(((.((....)))))..))))))))).....))..))))))))))))).))))))))).....)).)))).)))))	41.7	-53.8	1
	bna-MIR167b-p3	21	3'	679	640	526	793	bna-MIR167b		chrA05	-	11557588	11557711	ggcgcaccggcatctgaTGAAGCTGCCAGCATGATCTAattatctttctttctccgttgacgatggaaaagacatgagtgttgattaGATCATGTTCGCAGTTTCACCcgttgactgtctcgcc	((((...(((((.....(((((((((.(((((((((((((((.((((((((.((((((...)))))))))))...)))...))))))))))))))).))))))))).....)).)))...))))	47.6	-48.9	0.8
GATCATGTTCGTAGTTTCACC	bna-MIR167c-p3	21	3'	5730	2935	4435	3639	bna-MIR167c		chrA03	+	18100976	18101107	ggtgcaccggcatctgaTGAAGCTGCCAGCATGATCTAgttaactttatttctccgttgtttatccatgacaatggaaaagggataagtgtcgattaGATCATGTTCGTAGTTTCACCcgttgactgtcgca	..(((..(((((.....(((((((((.(((((((((((((..(((((((..((((((((((.......)))))))))...)..))))).))..))))))))))))).))))))))).....)).)))..)))	43.9	-54	0.9
AGATCATCCTGCGGCTTCATT	bna-MIR167d-p3	21	3'	213	108	164	133	bna-MIR167d		chrA08	-	7867894	7867958	taagtgattaagtgagtatatggtagtaccAGATCATCCTGCGGCTTCATTcactcaatcaccaa	...((((((.(((((....((((.(((..(((......)))..)))))))))))).))))))...	40	-17.5	0.7
CGGATCCCGCCTTGTATCAAG	bna-MIR168a-p3	21	3'	38	36	29	45	bna-MIR168a		chrAnn_random	-	5900999	5901131	ttacggcggcctctgacTCGCTTGGTGCAGGTCGGGAActgattggctgacaccgccacgtggctttccatggttggcttgtgagcagggatCGGATCCCGCCTTGTATCAAGtgaatccgagtccgacgtga	(((((.(((.(((.((.((((((((((((((.(((((.((((((.(((.(((..(((((((((....)))))..)))).))).)))...)))))).))))).)))))))))))))).)).))).))).)))))	58.6	-69.3	0.9
CTCGGATTCGCTTGGTGCAGG	bna-MIR168b-p5	21	5'	11	8	8	10	bna-MIR168b		chrAnn_random	-	46217697	46217826	accgtcttgCTCGGATTCGCTTGGTGCAGGtcgggaactaattgtctaacacatccacgaagttttacttgctggtttgtgagcagggattggatcccgcctTGCATCAATTGAATCGGAGCCCTgatcg	...(((..((((.(((((..((((((((((.(((((.((((((......((((.(((..(((.....)))..)))..))))......)))))).))))).))))))))))..))))).))))...)))..	50.8	-52.7	0.8
GGCAGTCTCCTTGGCTATC	bna-MIR169c-p3	19	3'	16	8	12	10	bna-MIR169c		chrA02	-	20850446	20850626	agatgaatagaagaatcatatttggTAGCCAAGGATGACTTGCCTatttttttgagaagtaaaatgggcatggtgtcatgtttaaaagttactgtaggtagtttcacttttgaccattttgcttacaaaatgatattaGGCAGTCTCCTTGGCTATCcttatatgttcttctctctcatct	((((((..(((((((.(((((..((((((((((((.(((.((((((...(((((..((((((((((((((((....)))))((((((((.((((....))))...))))))))))))))))))).)))))......))))))))))))))))))).))..))))))))))))...))))))	34.8	-73.7	1.2
	bna-MIR169d-p3	19	3'	16	8	12	10	bna-MIR169d		chrA06	+	21693595	21693815	gaaggagatgtcaaagatgaataggagaattctatttggTAGCCAAGGATGACTTGCCTacttctttgcgaaggaaaatggtcacggtgtcatgtttgaaagtgaatatatatttataagagtatatcaattagtgaccattttgcgtataaaaagatattaGGCAGTCTCCTTGGCTATCcttatatgttcttctttctcatctcagacattttaccttc	((((((((((((..((((((..((((((((..(((..((((((((((((.(((.((((((..((((((((....(((((((((((....((((........))))..((((((((....))))))))......))))))))))).))))....))))...))))))))))))))))))).))..))).))))))))...))))))..)))))))..)))))	35.3	-86.5	1.1
	bna-MIR169e-p5	19	5'	16	8	12	10	bna-MIR169e		chrC02	-	39445218	39445496	gtttcaGGCAGTCTCCTTGGCTATCttgacatgcttttttcttccatgttataccttctttctttgtatttttcgaatccaaataatattttttttctataaatttactacgaaaatcctttaaacaatctctaacaaagtatgttattagaaaactaccacttttttgcatttattacaaatgcatgtacgtggtgagtgtatgcattctttagaaggaaatgtcaaagatgaatagaagaatcatatttggTAGCCAAGGATGACTTGCCTatttct	.....((((((((((((((((((((.(((((((...........))))))).................................(((((..(((((((((..((((...(((....((((((......(((.(((((.....)))))..))).....(((((.....(((((((.....))))))).....)))))(((((....)))))....))))))..)))...))))..)))))))))..))))).)))))))))))).)))).))))......	30.8	-71.5	0.8
	bna-MIR169i-p3	19	3'	16	8	12	10	bna-MIR169i		chrC02	-	39445460	39445633	agagtcatgtttagTAGCCAAGGATGACTTGCCTGctctttttcacctccatgattcaattttatgtacagttttggattactatgcttctaaagagtatagtaattcaaaatcttgttgaatctttgtgggtaacagtttcaGGCAGTCTCCTTGGCTATCttgacatgcttt	((((.((((((..(((((((((((.(((.((((((..((.((..(((..((.((((((((..........(((((((((((((((((((.....)))))))))))))))))))...))))))))..))..))))).))...))))))))))))))))))))...))))))))))	36.8	-73.7	1.2
GGCAGTCTCCTCGGCTATT	bna-MIR169h-p3	19	3'	22	24	17	30	bna-MIR169h		chrC08	+	33856449	33856624	gagaaatggtgacatgaagaatgagaagttgtgtggTAGCCAAGGATGACTTGCCTGcgtcttagaccatatctatcaaagactaaaagattgatagtcttcgatgaattggttaatcggtaGGCAGTCTCCTCGGCTATTcagacagttctctttctcctcatttcacatttctc	((((((((.(((.((((((((.(((((.((((.((((((((.((((.((((.((((((......(((((..((.(((.(((((((.........))))))).)))))..))))).....)))))))))))))).))))).))).))))))))).))))..)))).)))))))))))	41.5	-73.9	1
	bna-MIR169k-p3	19	3'	22	24	17	30	bna-MIR169k		chrA06	-	7217956	7218110	aaacggtgacatgaagaatgagaagttgtgtggTAGCCAAGGATGACTTGCCTGcgtcttaacaccatatcacagactttatcgatagtctctgagttggttaggctgtaGGCAGTCTCCTCGGCTATTcagacactcctctttctcctcatttc	.......((.((((((((.(((.((.(((.((((((((.((((.(((.(((((((((((....((((..(((.(((((........))))).)))..)))).)))).)))))))))))))).)))))).)).))))).))).))))..)))).))	45.8	-61.2	0.9
GCAAGTCGACTTTGGCTCTG	bna-MIR169m-p3	20	3'	180	24	139	30	bna-MIR169m		chrC03	+	59573894	59574056	tatatgtatcagagagtcatgcatgggaaaatagagaatgataaTGAGCCAAAGATGACTTGCCGattttaccaaagaatttaaaactgataatggtgactgGCAAGTCGACTTTGGCTCTGtttccttctcttcttttcgatgtaagactctagatatctat	.....(((((..((((((.(((((.(((((..((((((.((....(((((((((..(((((((((...((((((...................)))))).)))))))))..)))))))))....)).))))))..))))).))))).)))))).)))))....	36.2	-67	1.1
CGCTATCCATCCTGAGTTCC	bna-MIR390c-p3	20	3'	28	15	22	19	bna-MIR390c		chrCnn_random	+	30336150	30336277	gcgtagtagagaagtagctgtaAAGCTCAGGAGGGATAGCGCCatgacgcatcaccattactatatgtctttgtatatgtaatggCGCTATCCATCCTGAGTTCCatggcttcttcttgctttaatgt	((((((((.(((((.(((..(..(((((((((.((((((((((((.(((((....(((......)))....)))....)).)))))))))))).)))))))))..)..))).)))))))))...))))	43.8	-55.6	1
GTTCCCTGAAACGCTTCATTG	bna-MIR395e-p5	21	5'	12	9	9	11	bna-MIR395e		chrA07	+	20464967	20465062	ccccttgaGTTCCCTGAAACGCTTCATTGttcattacgtagatgtttagtaaatcaatctaatgaacactgaagtgtttggggggactctaggtgg	(((((.((((((((..((((((((((.(((((((((..(.(((.........))).)..))))))))).))))))))))..)))))))).))).))	42.7	-46.6	1.1
AGGGCAAGATCTCCTTTGGC	bna-MIR399c-p5	20	5'	23	3	18	4	bna-MIR399c		chrCnn_random	-	36519831	36519933	attacAGGGCAAGATCTCCTTTGGCaggaatccattacttcagtcttacatatgcatatatgtttgtggtgagctctcTGCCAAAGGAGATTTGTCCGGtaat	(((((.((((.((((((((((((((((((.....((((..(((....((((((....)))))))))..))))..)).)))))))))))))))))))).)))))	41.7	-44.2	1
TGTTTTGTGCGTGAATCTAATT	bna-MIR403-p5	22	5'	71	77	55	95	bna-MIR403		chrA05	-	283711	283821	agagaagagtcatattacaTGTTTTGTGCGTGAATCTAATTcgtatgctcatgtagtaatcctatcttgttgttggaTTAGATTCACGCACAAACTCGtaatctgtctttt	....(((((.((.(((((..(.(((((((((((((((((((((...((....((((.....))))...))...))))))))))))))))))))))..))))).)).)))))	35.1	-41.7	1.1
CCTTCTCATCGATGGTCTAGA	bna-MIR824-p3	21	3'	3278	3878	2537	4809	bna-MIR824		chrA03	+	23971868	23972499	cctcgagttgtctttcatgtcTAGACCATTTGTGAGAAGGGAttttttgtttgcaccgtccaccccactctcaatctgtagtgagtattaaggaaaatagcttgttcaacatatcacactactcttttagaaacaaaactatattttagatgcttttccagcttgatatacgttgttttgttatgtatacctgtattctcccggctaccaaaacgttaagaaataaggtgaacatctccccaaaacctgcatccaattagaaaggtctaggtcacagccattacttgctatctctcgattaagctattttatttctatcatcatcatcagatcattcaggagttgagtataaaataaaatacattaagtccattcatgacatttctggatgctgcatac…	((((((((..(((..((..((((((((((..(((((((((((((........(((((.....((((((((((....(((((((((((....(((((..(((.................(((......)))........(((.....)))..)))))))).((..(((....(((.((((((((((.((((((.((.......(((..((((((......((((((.((.((.....)).)).......(((((((....(((.(((((.(((....))).......((((((....)))..)))........................))))).))).(((.((((((((........)))).)))).)))..............))))))).......…	38.1	-193.9	0.8
TCCGATTGGCTTTAGGCTGTT	bna-MIR1140-p5	21	5'	1971	541	1526	671	bna-MIR1140		chrA03_random	-	242834	243008	tcccctgttctctcaatcttttatatggcTCCGATTGGCTTTAGGCTGTTgtggctttgacttctttctaaagtcttcaaaatttagtttttcacaatcacgttaaatttttttaaaagtcacagccacaACAGCCTAAACCAATCGGAGCcatggtgatgagttcttgtaaggg	..((((.....(((.(((.....(((((((((((((((.(((((((((((((((((.((((((....(((((..........)))))..(((.((......)).))).........)))))).))))))))))))))))))))))))))))))))..))))))........))))	38.9	-76	1.1
TGAATGTCTTTCTCTTCATC	bna-MIR6028-p3	20	3'	342	220	265	273	bna-MIR6028		chrA05_random	-	1570345	1570475	acaagcacggttgggatgaTGGAGAGTAAGGACATTCAGATCtgcgaagcttatggtcccgtaacttttaaaatggattgggtgtttgagtttgttgaccTGAATGTCTTTCTCTTCATCaaaactgcctc	........(((.....((((((((((.((((((((((((.((..(.(((((((....((((...((........))..))))....))))))))..)).)))))))))))))))))))))).....)))..	42.7	-49	0.9
GTCTGTATGTGTGGGCTGAGT	bna-MIR6030-p5	21	5'	667	371	516	460	bna-MIR6030		chrA06	+	9009584	9009696	tcagggattaagtGTCTGTATGTGTGGGCTGAGTaggcacaatcacagcttttactcagatctggttgtgaatggaccttcTCCACCCATACCATACAGACCCttaatcctga	...(((((((((.(((((((((((((((..(((.(((..((.((((((((.............)))))))).))..))).)))..)))))).))))))))).)))))))))..	46	-55.6	1.1
TGTTTCGAAACGCTGTCAACCGCT	bna-MIR6031-p3	24	3'	192	85	149	105	bna-MIR6031		chrA02	-	12939998	12940068	tAAGAGGTTCGGAGCGGTTTGAAGCgatttatagcggtttgtatgatTGTTTCGAAACGCTGTCAACCGCT	..((.((((.((((((.(((((((((((((((((....))))).)))))))))))).)))).)))))).))	45.1	-23.3	0.7
3.2. The reads were almost mapped to B. napus pre-miRNAs.
Sequence	Name	Length	Type	WA Raw	TG Raw	WA Norm	TG Norm	rep MIR ID	rep miR ID	Genome ID	Strand	Start	End	pre-miRNA	SS	CG%	dG	MFEI
GGGATTGTTGTCTGGCACGAGG	bna-MIR166e-p5_1ss5AT	22	5'	428	164	331	203	bna-MIR166e		chrA07	-	13453507	13453636	ttcttttgagGGGAATGTTGTCTGGCACGAGGcccttaacacagatctacgatcggttatatatataatatatgaacgatcaatttagtggttgatgacgTCGGACCAGGCTTCATTCCCCtcaattaca	.....((((((((((((..((((((..(((.....(((((.((.......(((((.((((((((...)))))))).))))).......))))))).....)))..))))))..)))))))))))).....	41.5	-49.4	0.9
GGAATGTTGTCTGGACCGAGG	bna-MIR166f-p5_1ss16TC	21	5'	197	87	152	108	bna-MIR166f		chrA01	+	17152012	17152140	agttgaggGGAATGTTGTCTGGATCGAGGatattatatatacacaaatacgtatatatgttaatacaagtgtttgatcatatatgtatatagattattcTCGGACCAGGCTTCATCCCCCctaacatgt	.(((..((((.(((..((((((..((((((((...(((((((((((((((((((........))))..)))))))........))))))))...))))))))..))))))..))).))))..)))....	34.9	-48.5	1.1
GGCAAGTCGTCCTTGGCTATA	bna-MIR169a-p3_1ss8TC	21	3'	189	69	146	86	bna-MIR169a		chrC05	+	38305212	38305344	tgtgaccaaagtagtgtgCAGCCAAGGATGACTTGCCGAtttaaaatatctgataagtattttatttcgtattttaaagaaaaaaaatcatgatcGGCAAGTCGTCCTTGGCTATAcgtttctttgtgtcgcg	.((((((((((.(..((..((((((((((((((((((((((((((((((..((((((...))))))..))))))))..((.......))..))))))))))))))))))))))..))..).))))).))))).	36.8	-61	1.2
[1]Name	1. L-N or L+N mean that the miRNA sequence is N base less or more than known miRNA sequence in the left side.
	2. R-N or R+N mean that the miRNA sequence is N base less or more than known miRNA sequence in the right side.
	3. NssNTA means N substitutin that is T changes to A at position N.
	4. New-stand miRNAs are named as MIR-p5 or MIR-p3.
[2]rep MIR ID	Representative known pre-miRNAs
[3]rep miR ID	Representative known miRNAs
[4]pre-miRNA	pre-miRNA sequences from B. napus genome
[5]SS	Secondary structure
[6]MFEI	Minimal folding energy indexes (MFEI) = -dG*100/pre-miRNA length/CG%

## Sheet: S3.2
Additional file 3: Table S3.2 - Conserved miRNAs were mapped to other species pre-miRNAs in Brassicaceae and these pre-miRNAs were further mapped to B. napus genome in the WA and TG libraries
1. The reads were completely mapped to miRNAs from other species in Brassicaceae.
Sequence	Name[1]	Length	Type	WA Raw	TG Raw	WA Norm	TG Norm	rep MIR ID[2]	rep miR ID[3]	Genome ID	Strand	Start	End	pre-miRNA[4]	SS[5]	CG%	dG	MFEI[6]
GCTTACTCTCTCTCTGTCACC	bra-miR156a-3p	21	3'	107	93	83	115	bra-MIR156a	bra-miR156a-3p	chrAnn_random	-	29262059	29262186	aaggtaaggggagGTGACAGAAGAGAGTGAGCACacatggtggctttcttgcatgcttttttcaattagggtttcatgcttgaagctatgtgtGCTTACTCTCTCTCTGTCACCccttctctctctct	..((..((..(.(((((((((((((((((((((((((((((....(((..(((((..(..(......)..)...)))))..))))))))))))))))))))))).))))))))).)..))..))....	46.1	-64.3	1.1
	ath-MIR156e-p3	21	3'	107	93	83	115	ath-MIR156e	ath-MIR156e-p3	chrA03	+	1757732	1757839	aggagGTGACAGAAGAGAGTGAGCACacatggtggctttcttgcatgcgtttttaattagggttttatgcttgaagctatgtgtGCTTACTCTCTCTCTGTCACCcct	(((.(((((((((((((((((((((((((((((....(((..(((((...(..(....)..)...)))))..))))))))))))))))))))))).))))))))))))	45.4	-59.2	1.2
TTTCCAAATGTAGACAAAGCA	bra-miR158-3p	21	3'	23465	21319	18164	26437	bra-MIR158	bra-miR158-3p	chrA08	+	2748114	2748220	atagcacgttatatctgttcttCTTTGTCTATCGTTTGGAAAAGattgatgacgctatctacactTTTCCAAATGTAGACAAAGCAaaaccgtgatgacgtcgtaga	...(((((((((....(((...(((((((((.((((((((((((...((((....))))....)))))))))))))))))))))...)))....))))))).))...	37.4	-37	0.9
CTTTGTCTATCGTTTGGAAAAG	bra-miR158-5p	22	5'	14565	11523	11274	14289	bra-MIR158	bra-miR158-5p	chrA08	+	2748114	2748220	atagcacgttatatctgttcttCTTTGTCTATCGTTTGGAAAAGattgatgacgctatctacactTTTCCAAATGTAGACAAAGCAaaaccgtgatgacgtcgtaga	...(((((((((....(((...(((((((((.((((((((((((...((((....))))....)))))))))))))))))))))...)))....))))))).))...	37.4	-37	0.9
TCGATAAACCTCTGCATCCAG	bna-miR162-3p	21	3'	3183	2055	2464	2548	bra-MIR162	bna-miR162-3p	chrA03	+	19785193	19785318	tgaaagttgaagtcgctGGAGGCAGCGGTTCATCGATCaattcctgtgaaaaatgatgttggaaacaatttacatgggaagcatgaatcgaTCGATAAACCTCTGCATCCAGtgcttctccttcct	...(((..((((.(((((((.((((.((((.(((((((.((((.(((.....(((..((((....))))...))).....))).)))).))))))).)))).)))).)))))))))))..)))...	43.7	-55.1	1
GGAGGCAGCGGTTCATCGATC	bra-miR162-5p	21	5'	158	63	122	78	bra-MIR162	bra-miR162-5p	chrA03	+	19785193	19785318	tgaaagttgaagtcgctGGAGGCAGCGGTTCATCGATCaattcctgtgaaaaatgatgttggaaacaatttacatgggaagcatgaatcgaTCGATAAACCTCTGCATCCAGtgcttctccttcct	...(((..((((.(((((((.((((.((((.(((((((.((((.(((.....(((..((((....))))...))).....))).)))).))))))).)))).)))).)))))))))))..)))...	43.7	-55.1	1
CACGTGCTCCCCTCCTCCAAC	bra-miR164e-3p	21	3'	4	11	3	14	bra-MIR164e	bra-miR164e-3p	chrC02	-	12239718	12239831	gtaggtgagaacctCCATGTTGGAGAAGCAGGGCAcgtgcaaaccaaaaaacatgaaatctgtttcatatgctttgCACGTGCTCCCCTCCTCCAACatgagctcctcaccatt	...((((((...((.((((((((((.((..(((((((((((((.((......((((((....)))))).)).)))))))))))))..)).))))))))))))...))))))...	48.2	-53.4	1
CCCGCCTTGCATCAACTGAAT	bra-miR168b-3p	21	3'	113	185	87	229	bra-MIR168b	bra-miR168b-3p	chrAnn_random	-	47010649	47010775	cgggctcggatTCGCTTGGTGCAGGTCGGGACtaattcgctgacacagccacgtggattttccttattggtttgtgagcagggattggatCCCGCCTTGCATCAACTGAATcggagcctcgatggtg	(((((((.(((((..((((((((((.((((((((((((.(((.((((((((...((.....))....))).)))))..)))))))))).))))).))))))))))..))))).))))).))......	55.1	-64.7	0.9
	bra-miR168c-3p	21	3'	113	185	87	229	bra-MIR168c	bra-miR168c-3p	chrA03	+	22228308	22228441	gaatcaccgtcgggctcggatTCGCTTGGTGCAGGTCGGGACacaaaatcactggtgcttttgccttattggtttgtgagcagggattggctCCCGCCTTGCATCAACTGAATcggagcctccaatggtgaaac	...(((((((.((((((.(((((..((((((((((.(((((..((..(((.((..(((((..(((.....)))....))))))))))))..))))).))))))))))..))))).))))))...)))))))...	53.7	-63.1	0.9
TCGCTTGGTGCAGGTCGGGAC	bra-miR168b-5p	21	5'	4490	3037	3475	3766	bra-MIR168b	bra-miR168b-5p	chrAnn_random	-	47010649	47010775	cgggctcggatTCGCTTGGTGCAGGTCGGGACtaattcgctgacacagccacgtggattttccttattggtttgtgagcagggattggatCCCGCCTTGCATCAACTGAATcggagcctcgatggtg	(((((((.(((((..((((((((((.((((((((((((.(((.((((((((...((.....))....))).)))))..)))))))))).))))).))))))))))..))))).))))).))......	55.1	-64.7	0.9
	bra-miR168c-5p	21	5'	4490	3037	3475	3766	bra-MIR168c	bra-miR168c-5p	chrA03	+	22228308	22228441	gaatcaccgtcgggctcggatTCGCTTGGTGCAGGTCGGGACacaaaatcactggtgcttttgccttattggtttgtgagcagggattggctCCCGCCTTGCATCAACTGAATcggagcctccaatggtgaaac	...(((((((.((((((.(((((..((((((((((.(((((..((..(((.((..(((((..(((.....)))....))))))))))))..))))).))))))))))..))))).))))))...)))))))...	53.7	-63.1	0.9
GCAGCACCATTAAGATTCACA	bra-miR172b-5p	21	5'	84	46	65	56	bra-MIR172b	bra-miR172b-5p	chrA09_random	-	3970388	3970494	tgtaggtGCAGCACCATTAAGATTCACAtggaaattgagaaaaccctaatttatattaaTTAGGGTTCTGATATGTATATGagaatcttgatgatgctgcatcaaca	.((.(((((((((.(((((((((((.((((...((..(((..(((((((((......))))))))))))...))...)))).))))))))))).))))))))).)).	33.6	-47	1.3
	ath-miR172e-5p_R+1	21	5'	84	46	65	56	ath-MIR172e	ath-miR172e-5p	chrC02	-	5599565	5599694	gtagttgcagatGCAGCATCATTAAGATTCACAagtgaagtggtttcctttgttttcgcctctccatccgaaaacaaagggttcttctcgaatgggaatcttgatgatgctgcatcagcatatacatggc	(((..(((.(((((((((((((((((((((.((..(((.(..(..(((((((((((((..........)))))))))))))..)..))))..)).))))))))))))))))))))).)))..))).....	43.1	-62.9	1.1
TTGGACTGAAGGGAGCTCCCT	bra-miR319-3p	21	3'	33	20	26	25	bra-MIR319	bra-miR319-3p	chrA01	+	6779227	6779425	ttgtagggatatatatcgagggagagcttccttgagtccattcagaggctgtgatatgatccaattagtttccgactcatccatccaaataccgagttactaaattttaagatagactcgttaaatgaatgaatgatgcggtagacaaattggaacattgattctctttggTTGGACTGAAGGGAGCTCCCTctctctt	.................(((((.((((((((((.((((((..((((((..((...(((.(((((((.(((((((..((((.(((.((..((.((((((.((........))...)))))).))..)).))).))))..))).)))).))))))).)))..))..))))))..)))))).)))))))))).)))))....	40.2	-73.9	0.9
	ath-miR319a	21	3'	33	20	26	25	ath-MIR319a	ath-miR319a	chrC03_random	+	5293128	5293301	agagagcttccttgagtccattcacaggttgtgatatgatccaattagcttcccaatcattcatccaaataccgagtcaccaaaattcaaactaaactcgttaaatgaatgtatgatgcggtagacaaattgggttattgattctctatgaTTGGACTGAAGGGAGCTCCCTct	((.(((((.((((.((((((.(((.(((..((...(((((((((((..((.((((.((((.(((.((..((.(((((..................))))).))..)).))).)))))).)).))...)))))))))))..))..))).))).)))))).)))).))))).))..	39.1	-55.3	0.8
	ath-miR319b	21	3'	33	20	26	25	ath-MIR319b	ath-miR319b	chrA04	-	9791673	9791841	GAGCTTTCTTCGGTCCACTcatagaataatatgtgagatttaattgactctcgactcattcatccaaataccaaatgaaagaatatgtagacatatggtaaatgaatgaatgatgctagagacaaattgaatcttcacttctctatgcTTGGACTGAAGGGAGCTCCCT	(((((..((((((((((..((((((.......(((((((((((((...((((...((((((((.((..(((((.(((..............))).)))))..)).)))))))).....))))..)))))))))).)))...))))))..))))))))))..)))))...	36.7	-67	1.1
	aly-miR319a-3p	21	3'	33	20	26	25	aly-MIR319a	aly-miR319a-3p	chrC01	+	10651723	10651921	ttgtaggaatatatatcgagggagagcttccttgagtccattcagaggctgtgatatgatccaattagtttccgactcatccatccaaataccgagttactaaattttaaactagactcgttaaatgaatgaatgatgcggtagacaaattggaacattgattctctttggTTGGACTGAAGGGAGCTCCCTctctctt	.................(((((.((((((((((.((((((..((((((..((...(((.(((((((.(((((((..((((.(((.((..((.((((((................)))))).))..)).))).))))..))).)))).))))))).)))..))..))))))..)))))).)))))))))).)))))....	39.7	-73.8	0.9
	aly-miR319b-3p	21	3'	33	20	26	25	aly-MIR319b	aly-miR319b-3p	chrCnn_random	+	10467769	10467990	aaatgttaatatggtcagggatgctgggttggtgggggaaggGAGCTTTCTTCGGTCCACTcatagaataatatgtgagatttaattgactctcgactcattcatccaaataccaaatgaaagaatatgtagacatatggtaaatgaatgaatgatgctagagacaaattgaatcttcacttctctatgcTTGGACTGAAGGGAGCTCCCTttttttatttt	..............((((.....))))....((..(..(((((((((..((((((((((..((((((.......(((((((((((((...((((...((((((((.((..(((((.(((..............))).)))))..)).)))))))).....))))..)))))))))).)))...))))))..))))))))))..)))))))))..)..))...	37.4	-82.7	1
TTGGACTGAAGGGAGCTCCTT	ath-miR319c	21	3'	27	23	21	28	ath-MIR319c	ath-miR319c	chrA03	+	9084745	9084945	tagatatagaaggagattctttcagtccaatcatggatagaacaagaagagagtagaaatATCTGCCGACTCATCCATCCAaacaccggtggtaaaaaagacaagaaattttaggccacagtgactgtgtgaatgatgcgggagatgtttttcatccttctttatctgtgtTTGGACTGAAGGGAGCTCCTTctttctcta	((((...((((((((.((((((((((((((.((..((((....((((((.((..((((((((((.(((..((((.((..((..(((..(((((..((((.........))))..))))).)))..))..)).))))..))).))))))))))..))))))))))))..)).)))))))))))))).))))))))...))))	40.3	-85.9	1.1
	aly-miR319d-3p	21	3'	27	23	21	28	aly-MIR319d	aly-miR319d-3p	chrC04	+	46407591	46407840	tatgaagcgagactgaaatagatagatatagaaggagattctttcagtccagtcatggatagaacaagaagagggtagaaacATCTGCCGACTCATCCATCCAaacacttctggtaaaaagaaaatagattttataccacagtggctgtgtgaatgatgcgggagatgttttcatctctctttatctgtgtTTGGACTGAAGGGAGCTCCTTctttatctacatgtttcaatttttctcatgatctttta	((((.((..(((.(((((((..((((((.((((((((.(((((((((((((..((..((((.......(((((((..(((((((((.(((..((((.((..((..((((..(((((.((((........)))).))))).))))..))..)).))))..))).)))))))))...)))))))))))..))..))))))))))))).)))))))).))))))..))))))).)))..))))))........	37.6	-102.6	1.1
ACGGTATCTCTCCTACGTAGC	bra-miR391-3p	21	3'	99	139	77	172	bra-MIR391	bra-miR391-3p	chrA10	+	10707705	10707808	gcaaataaaggttcgcTTCGCAGGAGAGATAGCGCCAtcacttcttcttaagagtttagaagatggtgACGGTATCTCTCCTACGTAGCaatccttatatatgc	(((.(((((((...(((.((.((((((((((.((.(((((..((((((.........))))))))))).)).)))))))))).)).)))...)))).))).)))	43.3	-43.8	1
TTCGCAGGAGAGATAGCGCCA	bra-miR391-5p	21	5'	128	103	99	128	bra-MIR391	bra-miR391-5p	chrA10	+	10707705	10707808	gcaaataaaggttcgcTTCGCAGGAGAGATAGCGCCAtcacttcttcttaagagtttagaagatggtgACGGTATCTCTCCTACGTAGCaatccttatatatgc	(((.(((((((...(((.((.((((((((((.((.(((((..((((((.........))))))))))).)).)))))))))).)).)))...)))).))).)))	43.3	-43.8	1
TGTGTTCTCAGGTCACCCCTG	bra-miR398-3p	21	3'	4143	31626	3207	39219	bra-MIR398	bra-miR398-3p	chrA03	+	2288822	2288945	gtggacctcgacaGGGTCGACATGAGAACACATGgtaatcaaaggctgtaatgacgccacgtcattgtaacatacatctctcttttcaTGTGTTCTCAGGTCACCCCTGctgagctctttctct	..(((.(((..(((((..(((.(((((((((((((.......(((.((((((((((...)))))).......)))))))......))))))))))))).)))..)))))..))).)))......	47.6	-46.6	0.8
GGGTCGACATGAGAACACATG	bra-miR398-5p	21	5'	28	116	21	143	bra-MIR398	bra-miR398-5p	chrA03	+	2288822	2288945	gtggacctcgacaGGGTCGACATGAGAACACATGgtaatcaaaggctgtaatgacgccacgtcattgtaacatacatctctcttttcaTGTGTTCTCAGGTCACCCCTGctgagctctttctct	..(((.(((..(((((..(((.(((((((((((((.......(((.((((((((((...)))))).......)))))))......))))))))))))).)))..)))))..))).)))......	47.6	-46.6	0.8
TGCCAAAGGAGAGTTGCCCTG	ath-miR399c-3p	21	3'	4112	1014	3183	1257	ath-MIR399c	ath-miR399c-3p	chrA02	+	23782053	23782180	taagcagagcagtaataGGGCATCTTTCTATAGGCACGcgactatgcaatttgctcttttgtgttctgggtagcttattggctttgtcactTGCCAAAGGAGAGTTGCCCTGtaactgcttccgctta	(((((.(((((((.((((((((.((((((...((((...(((...(((((..(((((...........)).)))..))).))...)))...))))...)))))).)))))))).)))))))..)))))	45.3	-51.3	0.9
GACTTATAATGATCTCATGAA	bra-miR400-3p	21	3'	24	28	19	35	bra-MIR400	bra-miR400-3p	chrAnn_random	+	40582790	40582930	atcttttcttGAGAAGTTGCTGAAGATTGTTTtatgagagtattataagtcactgcatttggtaatcaagtgttgctttcccaaacgaagtGACTTATAATGATCTCATGAAtcgatttttgcaaagtcttaagagagtaa	...(((((((((((..((((.((((((((.(((((((((..(((((((((((((...(((((.....(((.....)))..)))))...)))))))))))))..))))))))).))))))))))))..)))))))))))...	32.6	-56.9	1.2
TACATCTTCTCCGCGGAAGCTC	bra-miR1885b	22	3'	11614	6645	8990	8240	bra-MIR1885a	bra-miR1885b	chrAnn_random	-	10824963	10825318	ttgtctcacaactgtatccatcctgtcttcacgagcttcctctagaagatgtgcgCAGAGTCTTTTTAAGTCACACTCataaaaagttcaaagaaaaggagtcatactttcattgataatgaaatcaatagagagaatgatactgagctcttacattcgattagatgcgataatcttagatcctctaattgcttgtaagagctgatgaccaatggatcatcctctattgatctcttcatcaatgaaaggtatgattccctttctttgaaattcctttgaatgtgagtgagaaagtctctacgTACATCTTCTCCGCGGAAGCTCatgaaaacaaggtagaaccaattgtggacaaa	(((((.(((((.((..((.(((.(((.((((.((((((((...((((((((((((.((((.((((((...(((((.(((.......((((((((((.((((((((((((((((((((...((.((((((((((............((((((((((..((((((((...(((........))).))))))))..))))))))))(((((((...)).))))))))))))))).))...)))))))))).)))))))))).)))))))))).......))).)))))...)))))).)))).))))))))))))....)))))))).)))).))).))).))..)).)))))))))).	37.6	-156.2	1.2
ATAAATCCCAAGCATCATCCA	bra-miR5654a	21	5'	109	155	84	192	bra-MIR5654a	bra-miR5654a	chrA05	-	13278138	13278332	taatgatgtattgtagctctgcgtttcttgttcgttcactcttttgtcaggtattaacaagATAAATCCCAAGCATCATCCAccttattagcccttgaacatgaaggcttgtaaaatgGATGATGCTTGGGATTTATTTtgtactctcctcttctaaaagagtgttgcctccataggactaccaatgatttcaga	...(((..((((((((..(((.......((...((.((((((((((..(((.....((((((((((((((((((((((((((..(((..((((.((......)).))))..)))..)))))))))))))))))))))))))).....)))....))))))))))..))...)))))..)))).))))...)))..	37.9	-71.8	1
AATATTAATATAATTGGTGAG	bra-miR5712	21	3'	16	2	12	2	bra-MIR5712	bra-miR5712	chrA01	+	5938186	5938315	ttaagaatctctcatcaattatattagtatttaaatagaaagtttctcaaaaacttaagagatttatgtgaggatagatttttactgagaatattctatcaaAATATTAATATAATTGGTGAGagattca	....((((((((((((((((((((((((((((..((((((...((((((........((((((((((......))))))))))..))))))..))))))..)))))))))))))))))))))))))))).	22.3	-50.7	1.7
TCAGAACCAAACACAGAACAAG	bra-miR5718	22	3'	55	68	43	84	bra-MIR5718	bra-miR5718	chrA09	+	4352552	4352785	tgatttatgttttgttgatctTGTTCTGGTTTGGTTTTGAACagcttagtgttgctctgtaatggatgcataaccagtagatatgtcaggatattaaaaggaaccgttattttgcctcgtgatagcgatgttccttcgaatcttctgacatatctactgcttatgccaccattacagaacagcaacaagctgtTCAGAACCAAACACAGAACAAGaacaacggaacataaaatc	...((((((((..((((.(((((((((((((((((((((((((((((..(((((.((((((((((..((((((.(((((((((((((((((.(((..((((((((((((((.........)))))))..)))))))..))).))))))))))))))))).))))))..)))))))))).)))))..))))))))))))))))))).)))))))))).))))..))))))))...	38	-134	1.5
TTTTGCGTTTCAACTCGGTCC	bra-miR9557-5p	21	5'	434	273	336	339	bra-MIR9557	bra-miR9557-5p	chrA07_random	-	99265	99452	gccgctttattcttcacttacgcatgctgtctttacagttcacactgaTTTTGCGTTTCAACTCGGTCCtcatttctttataacgaagtggaggaacaaaaagatgttttcagaagaacattgaagaggaagagaatgaaagctgcaagttaaaagaAATGAGGGCTGAGTTGGAACGCaaaatcttt	.........................(((((....))))).......(((((((((((((((((((((((((((((((((.((((...(..(...............(((((((.......)))))))...............)..)..)))))))))))))))))))))))))))))))))))))...	38.8	-64	0.9
AGAGATGTCTGGCTTGCAACA	bra-miR9558-5p	21	5'	259	132	200	164	bra-MIR9558	bra-miR9558-5p	chrC03_random	+	1702602	1702746	caatgcaaacactgtggcaaAGAGATGTCTGGCTTGCAACAtctgaaatgtcacttgggtggtttaggtccagatgtgaacatgtcacatctactgttagagatgttgcaagccagacatttcctttcccacagtgttcacagtc	...((..((((((((((.((((((((((((((((((((((((((........((((..(...)..))))..((((((((.....))))))))........))))))))))))))))))))))).))).))))))))))..))...	44.8	-71.7	1.1
2. The reads were almost mapped to miRNAs from other species in Brassicaceae.
Sequence	Name	Length	Type	WA Raw	TG Raw	WA Norm	TG Norm	rep MIR ID	rep miR ID	Genome ID	Strand	Start	End	pre-miRNA	SS	CG%	dG	MFEI
TTCGGACCAGGCTTCATTCCCC	aly-miR166b-3p_L+1	22	3'	2401	1919	1859	2380	aly-MIR166b	aly-miR166b-3p	chrA09	+	27993117	27993268	agagggatttatcttttgaGGGGACTGTTGTCTGGCTCGAGGactcttattctaactcaatcacgttttataaaatctacttgatctgatgattgattagggttttagtgtcttcggaccaggcttcattccccccaattattacttcctct	(((((((........(((.(((((.((..((((((..(((((((.((.(..((((.(((((((((..(((...........)))..)).)))))))))))..)...)).)))))))..))))))..)).))))).))).......)))))))	40.1	-57.1	0.9
GGGGACTGTTGTCTGGCTCGAGG	aly-miR166b-5p_L+2	23	5'	11	9	8	11	aly-MIR166b	aly-miR166b-5p	chrA09	+	27993117	27993268	agagggatttatcttttgaGGGGACTGTTGTCTGGCTCGAGGactcttattctaactcaatcacgttttataaaatctacttgatctgatgattgattagggttttagtgtcttcggaccaggcttcattccccccaattattacttcctct	(((((((........(((.(((((.((..((((((..(((((((.((.(..((((.(((((((((..(((...........)))..)).)))))))))))..)...)).)))))))..))))))..)).))))).))).......)))))))	40.1	-57.1	0.9
GGGGACTGTTGTCTGGCTCGAGGA	aly-miR166b-5p_L+2R+1	24	5'	70	43	54	53	aly-MIR166b	aly-miR166b-5p	chrA09	+	27993117	27993268	agagggatttatcttttgaGGGGACTGTTGTCTGGCTCGAGGactcttattctaactcaatcacgttttataaaatctacttgatctgatgattgattagggttttagtgtcttcggaccaggcttcattccccccaattattacttcctct	(((((((........(((.(((((.((..((((((..(((((((.((.(..((((.(((((((((..(((...........)))..)).)))))))))))..)...)).)))))))..))))))..)).))))).))).......)))))))	40.1	-57.1	0.9
GGCAAGTTGTCCTTCGGCTAC	ath-miR169b-3p_R-1	21	3'	146	74	113	92	ath-MIR169b	ath-miR169b-3p	chrC07	-	34432102	34432281	cccaacggagtagaattgcatgaagtggagtagagtataatgCAGCCAAGGATGACTTGCCGGAGCgttgttcatcatgcataaaaaatattgatgatgatgatggtgatgaacataattctGGCAAGTTGTCCTTCGGCTACattttgctctcttctactcatgcaaactctccatggg	((((..((((.((..(((((((.((((((..((((((.((((.(((((((((..(((((((((((...((((((((((.(((.....((.......))....)))))))))))))...)))))))))))..))))).)))).)))).))))))..))))))))))))).)))))).))))	42.8	-88.1	1.1
TGTGTTCTCAGGTCACCCCT	bol-miR398a-3p_R-1	20	3'	45	296	35	366	bol-MIR398a	bol-miR398a-3p	chrC02	+	37793584	37793689	tgaaatctcaaagGAGTGTCATGAGAACACGGATCCTcttgtttctttaagatttccactgaaaccattgagtatTGTGTTCTCAGGTCACCCCTttgaatctccc	.......(((((((.(((...((((((((((.((.(((..(((((...............)))))....))).))))))))))))...))).))))))).......	41.5	-34.3	0.8
GGGCATCTTTCTATTGGCACG	ath-miR399c-5p_1ss20GC	21	5'	23	12	18	15	ath-MIR399c	ath-miR399c-5p	chrA02	+	23782053	23782180	taagcagagcagtaataGGGCATCTTTCTATAGGCACGcgactatgcaatttgctcttttgtgttctgggtagcttattggctttgtcactTGCCAAAGGAGAGTTGCCCTGtaactgcttccgctta	(((((.(((((((.((((((((.((((((...((((...(((...(((((..(((((...........)).)))..))).))...)))...))))...)))))).)))))))).)))))))..)))))	45.3	-51.3	0.9
AGTTTGGATTGTTTGCCTTGG	bra-miR5717_L+1R-1	21	5'	41	38	32	47	bra-MIR5717	bra-miR5717	chrA06	+	18941750	18941857	tctctctctctatgatccccAGTTTGGATTGTTTGCCTTGGcttcattcaccatcttcactaacgttacctgccaaggcaaacaatccaaactggggatcttagaaga	....(((.((((.(((((((((((((((((((((((((((((.............................))))))))))))))))))))))))))))).)))))))	44.4	-60.8	1.3
AAAAAATGGAGTGAGAAATGGAGT	bra-miR5721_L+1R+2	24	5'	22	4	17	5	bra-MIR5721	bra-miR5721	chrA02	-	22475947	22476124	gggcatctttatccccactccataatttactcCAAAAATGGAGTGAGAAATGGAGTatggacaaaaaataaaaaatttttatatttatggagtaatcacttttttgtttcttcactacttcattttccactccatttTGCAGTAAATTATGGAGTGGAGATgaaaatgctcttagtaa	((((((.((((((.(((((((((((((((((...(((((((((((..(((((((((((((((((((((....((((......))))...((....))..)))))))))....)).))))))))))..)))))))))))..))))))))))))))))).)))))).)))))).......	31.5	-76.2	1.4
TTCCCGTAAAGCTTAGAACCC	bra-miR9555a-3p_L-1R+1	21	3'	43	20	33	25	bra-MIR9555a	bra-miR9555a-3p	chrA07	-	23905535	23905741	taagttcttaaaatacatgtatgtatatgtatatattatatatgcgtatgtaattgtgggattttaaGCTTTACGGGAAACCCAACCGAAAgttccttaaataagaaattttcgattgcgtTTCCCGTAAAGCTTAGAACCCcgcaattaccaattacatacgcatatataatatataaatacacatacatatattttaagaaccta	...((((((((((((.((((((((.(((.(((((((((((((((((((((((((((((((.((((((((((((((((((((.(((.((((((((.(((....))).)))))))).))).)))))))))))))))))))).)))))).......))))))))))))))))))))))))).))).)))))))).))))))))))))...	29	-107.6	1.8
GGATATCTTAGGATGAGGTTC	bra-miR9568-5p_L-3R+2	21	5'	37	9	29	11	bra-MIR9568	bra-miR9568-5p	chrA03	+	13274664	13274813	ttctcttagagcatgattaatgcGGATATCTTAGGATGAGGTTCttagtgtaatataaaaaacatttattatttaaaagcttaaagaatcttttatagtacgttaaaAACCTCATCGTAAGAGATCTGcattaatcatattcttagatcc	...(((.(((..(((((((((((((((.(((((.(((((((((.(((..(((.(((((((....((((.............)))).....))))))).)))..))).))))))))).))))).)))))))))))))))..))).)))...	28	-55.6	1.3
3. The reads were not mapped to miRNAs from other species in Brassicaceae.
3.1. The reads were completely mapped to the pre-miRNAs from other species in Brassicaceae.
Sequence	Name	Length	Type	WA Raw	TG Raw	WA Norm	TG Norm	rep MIR ID	rep miR ID	Genome ID	Strand	Start	End	pre-miRNA	SS	CG%	dG	MFEI
AGCTGCTAAGCTATGGATCCC	ath-MIR159a-p5	21	5'	1907	699	1476	867	ath-MIR159a		chrC02	-	19215625	19215807	gtagagctccttaaagttcaaacgagagtttagcagggtaaagaaaAGCTGCTAAGCTATGGATCCCataagccctaaccttaaacatagaaaaaggatttggttatatggcTTGCATATCTCAGGAGCTTTaacttgccctttaatggcttttactcttctttggattgaagggagctctac	((((((((((((..((((((((..(((((..((((((((((...((((((.((.((.((((....(((((((((....((((...........))))....)))).)))))....)))).)).)).))))))...)))))))......)))...)))))..))))))))..))))))))))))	39.9	-70.3	1
	aly-MIR159a-p5	21	5'	1907	699	1476	867	aly-MIR159a		chrA07_random	-	1944182	1944394	aaaaaagaagattgaaagtagagctcctttaagttcaaacgagagtttagtagggtaaagaaaAGCTGCTAAGCTATGGATCCCataagccctaatccttatagagagaaaaaaaggatttggttataTGGCTTGCATATCTTAGGAGCtttaacttgccctttaattgcttttactcttctttggattgaagggagctctacaacttctttc	...(((((((.((....(((((((((((((.((((((((..(((((..((((((((((...((((((.(((((.((((....(((((((((..(((((((.............))))))).)))).)))))....)))).))))).))))))...)))))))......)))...)))))..)))))))).)))))))))))))))))))))).	36.2	-82.8	1.1
ATTTCTGGCAAGTTGTCCTTCGGCT	aly-MIR169b-p3	25	3'	143	70	110	87	aly-MIR169b		chrA02	-	23244790	23244953	gtgcccatcggagtagagttgcatgaagtggagtagagtataatgCAGCCAAGGATGACTTGCCGGAACgtcgttcatcatgcgtataggtattggtgatgaatatATTTCTGGCAAGTTGTCCTGCGGCTacattttgctctcttctactcacgcaaactctc	..............((((((((.((.((((((..((((((.((((.((((.((((..(((((((((((....(((((((((..(((....)))..)))))))))....)))))))))))..))))..)))).)))).))))))..)))))))).)))).)))).	46.3	-74	1
GAGAAGTTGCTGAAGATTGTTT	bra-MIR400-p5	22	5'	259	114	200	141	bra-MIR400		chrAnn_random	+	40582790	40582930	atcttttcttGAGAAGTTGCTGAAGATTGTTTtatgagagtattataagtcactgcatttggtaatcaagtgttgctttcccaaacgaagtGACTTATAATGATCTCATGAAtcgatttttgcaaagtcttaagagagtaa	...(((((((((((..((((.((((((((.(((((((((..(((((((((((((...(((((.....(((.....)))..)))))...)))))))))))))..))))))))).))))))))))))..)))))))))))...	32.6	-56.9	1.2
CAGAGTCTTTCTAAGTCACACTC	bra-MIR1885b-p5	23	5'	684	539	529	668	bra-MIR1885b		chrAnn_random	-	10824963	10825318	ttgtctcacaactgtatccatcctgtcttcacgagcttcctctagaagatgtgcgCAGAGTCTTTTTAAGTCACACTCataaaaagttcaaagaaaaggagtcatactttcattgataatgaaatcaatagagagaatgatactgagctcttacattcgattagatgcgataatcttagatcctctaattgcttgtaagagctgatgaccaatggatcatcctctattgatctcttcatcaatgaaaggtatgattccctttctttgaaattcctttgaatgtgagtgagaaagtctctacgTACATCTTCTCCGCGGAAGCTCatgaaaacaaggtagaaccaattgtggacaaa	(((((.(((((.((..((.(((.(((.((((.((((((((...((((((((((((.((((.((((((...(((((.(((.......((((((((((.((((((((((((((((((((...((.((((((((((............((((((((((..((((((((...(((........))).))))))))..))))))))))(((((((...)).))))))))))))))).))...)))))))))).)))))))))).)))))))))).......))).)))))...)))))).)))).))))))))))))....)))))))).)))).))).))).))..)).)))))))))).	37.6	-156.2	1.2
GATGATGCTTGGGATTTATTT	bra-MIR5654a-p3	21	3'	28	15	22	19	bra-MIR5654a		chrA05	-	13278138	13278332	taatgatgtattgtagctctgcgtttcttgttcgttcactcttttgtcaggtattaacaagATAAATCCCAAGCATCATCCAccttattagcccttgaacatgaaggcttgtaaaatgGATGATGCTTGGGATTTATTTtgtactctcctcttctaaaagagtgttgcctccataggactaccaatgatttcaga	...(((..((((((((..(((.......((...((.((((((((((..(((.....((((((((((((((((((((((((((..(((..((((.((......)).))))..)))..)))))))))))))))))))))))))).....)))....))))))))))..))...)))))..)))).))))...)))..	37.9	-71.8	1
CTGTATAACATTTGCAAAACT	bra-MIR5720-p3	21	3'	37	38	29	47	bra-MIR5720		chrA09_random	+	177963	178252	aaacttgtaaaagaaaatcatcgtacagttaaaatttctacgataattcattcgaagttttgcaattaatgttatacagatattctaaccaaatcACAAAACCATAATACTGTATACCTatatatctcgtctaaaagctgcatatctagtagtgaaatatataggtatactatacagtattatggttttgtgatttggttggaatatCTGTATAACATTTGCAAAACTttaaatgaattatcgtggaatttttaactgtacgatgattttcttttacgagttttcttctt	((((((((((((((((((((((((((((((((((.(((((((((((((((((..((((((((((...((((((((((((((((((((((((((((((((((((((((((((((((((((((((((.(((.(((..((........))..)))))).))))))))))).....)))))))))))))))))))))))))))))))))))))))))))))))))))))))))..))))))))))))))))).)))))))))))))))))))))))))))))))))).......	26.9	-172.6	2.2
CTTCCACCTTCGTGAAATGTG	bra-MIR5723-p5	21	5'	81	36	63	45	bra-MIR5723		chrA02	+	20835304	20835466	gctatggaCTTCCACCTTCGTGAAATGTGctgcaatatctctgcaaacattgttttttttcatttgcttttgtgctgtatcatttgatagatggctataaactagattagttttctgcagagatattgcagcacatttcacgaaggtggaattccatagcaca	((((((((.((((((((((((((((((((((((((((((((((((..............(((((((.((..(((......)))..)))))))))....((((((...))))))..)))))))))))))))))))))))))))))))))))).))))))))...	37.4	-89.1	1.5
TGGCACAATCTGATCTGCATC	bra-MIR5725-p3	21	3'	66	39	51	48	bra-MIR5725		chrA08	+	4620793	4620997	aaggtatcttctttacgttaacaaatagtATACGATGCAGATCAGATTGTGCCaaatctaaaaattacttaagaacacacatatgtcaattcataatcagccatggtattgacatatgtgtgtgcttaagtaatttttagattTGGCACAATCTGATCTGCATCgtatactatttgttaggattatatcttaggaaaattaggaa	(((((((..(((......(((((((((((((((((((((((((((((((((((((((((((((((((((((((.((((((((((((((((((((........)))).)))))))))))))))).))))))))))))))))))))))))))))))))))))))))))))))))))))))))))..)))))))..............	30.7	-120.5	1.9
ATACGATGCAGATCAGATTGTGCC	bra-MIR5725-p5	24	5'	57	28	44	35	bra-MIR5725		chrA08	+	4620793	4620997	aaggtatcttctttacgttaacaaatagtATACGATGCAGATCAGATTGTGCCaaatctaaaaattacttaagaacacacatatgtcaattcataatcagccatggtattgacatatgtgtgtgcttaagtaatttttagattTGGCACAATCTGATCTGCATCgtatactatttgttaggattatatcttaggaaaattaggaa	(((((((..(((......(((((((((((((((((((((((((((((((((((((((((((((((((((((((.((((((((((((((((((((........)))).)))))))))))))))).))))))))))))))))))))))))))))))))))))))))))))))))))))))))))..)))))))..............	30.7	-120.5	1.9
CACTGTAAAATGGAGTGGACT	bra-MIR9562-p5	21	5'	6	8	5	10	bra-MIR9562		chrA02_random	+	1408210	1408358	agtgtcttaaaacatttccaactcCACTGTAAAATGGAGTGGACTatgcaattgtgaacaaacaaaaaattcattactatatatgcagtaatgtttttatgtttaTTCACAACTGCATAATTCACTctattttgcagtagattttgcag	(((((......)))))......((.((((((((((((((((((.((((((.(((((((.(((((.((((..(((((((........))))))).)))).))))).))))))).)))))).)))))))))))))))))).))........	30.2	-55.7	1.2
AGATGGAAAATGTTTTTGACT	bol-MIR9408-p5	21	5'	9	9	7	11	bol-MIR9408		chrC01	-	13330598	13330728	aacgagttttgctcaggacaacattttcaAGATGGAAAATGTTTTTGACTtatgtagctgtgatcaaattttcgcagccacggttaagtcaaaagtatgTTTCATCTTAGAGAATGTTGTCcagaaccaat	...(((.....))).((((((((((((((((((((((.((..(((((((((((((.(((((((........))))))).)))..))))))))))..)).))))))))).))))))))))))).........	35.9	-58	1.2
GTCTACTAAGTCGTCCAGCTGG	bol-MIR9410-p5	22	5'	178	72	138	89	bol-MIR9410		chrCnn_random	+	66749309	66749403	tccagactacttaattataagtcgtctggaaaGTCTACTAAGTCGTCCAGCTGGAAGACTTTCTAGACGACTtaattataagtcgtctgcgaagt	(((((((.(((((....(((((((((((((((((((.(((.((......))))).)))))))))))))))))))....))))).))))).))...	40	-44.4	1.2
3.2. The Reads were almost mapped to the pre-miRNAs from other species in Brassicaceae.
Sequence	Name	Length	Type	WA Raw	TG Raw	WA Norm	TG Norm	rep MIR ID	rep miR ID	Genome ID	Strand	Start	End	pre-miRNA	SS	CG%	dG	MFEI
TGGCTTGCATATCTTAGGAGC	aly-MIR159a-p3_1ss15CT	21	3'	200	109	155	135	aly-MIR159a		chrA07_random	-	1944182	1944394	aaaaaagaagattgaaagtagagctcctttaagttcaaacgagagtttagtagggtaaagaaaAGCTGCTAAGCTATGGATCCCataagccctaatccttatagagagaaaaaaaggatttggttataTGGCTTGCATATCTTAGGAGCtttaacttgccctttaattgcttttactcttctttggattgaagggagctctacaacttctttc	...(((((((.((....(((((((((((((.((((((((..(((((..((((((((((...((((((.(((((.((((....(((((((((..(((((((.............))))))).)))).)))))....)))).))))).))))))...)))))))......)))...)))))..)))))))).)))))))))))))))))))))).	36.2	-82.8	1.1
GTTGTTTGCTGCTGTGGCATC	aly-MIR172a-p5_1ss2CT	21	5'	19	21	15	26	aly-MIR172a		chrA03	+	10570185	10570333	ggagccacggtcGTTGTTTGCTGCTGTGGCATCatcaagattcacatccgttgatggacggtggtggttcactctacccaaagttctcttgtgaaaatgggaatCTTGATGATGCTGCATCGGTAatcaacggctatccttttcctctc	((((....((((((((.((((((.((..(((((((((((((((.((((((((....))))).(((((......)))))..................))).)))))))))))))))..)).)))))).))))))))......))))....	48.3	-63.1	0.9
TGTTCTGGTTTGGTTTTGAAC	bra-MIR5718-p5_1ss13AG	21	5'	506	309	392	383	bra-MIR5718		chrA09	+	4352552	4352785	tgatttatgttttgttgatctTGTTCTGGTTTGGTTTTGAACagcttagtgttgctctgtaatggatgcataaccagtagatatgtcaggatattaaaaggaaccgttattttgcctcgtgatagcgatgttccttcgaatcttctgacatatctactgcttatgccaccattacagaacagcaacaagctgtTCAGAACCAAACACAGAACAAGaacaacggaacataaaatc	...((((((((..((((.(((((((((((((((((((((((((((((..(((((.((((((((((..((((((.(((((((((((((((((.(((..((((((((((((((.........)))))))..)))))))..))).))))))))))))))))).))))))..)))))))))).)))))..))))))))))))))))))).)))))))))).))))..))))))))...	38	-134	1.5
TCGGATTATCATCACAACACT	bra-MIR5719-p3_1ss21AT	21	3'	1226	1297	949	1608	bra-MIR5719		chrA03	-	28369284	28369488	tgatccctcttgcttctaaatttttttagatctagTGTTGTGATGATAATCCGATTtccaagatccaaaccaacaagtttctatcgacattatcaacgcatgagtgatggtgaccatgttgaaacttgttgatttggtcatagaagTCGGATTATCATCACAACACAagataaaaaaaaactttttaaaagcaaaagcgggatca	.((((((.(((((((.(((((((((((..((((.((((((((((((((((((((((((...((.(((((.(((((((((((....((((((((((.(((....))).))))))...))))))))))))))).)))))))...)))))))))))))))))))))))).))))..)))))))...)))).)))))..)).)))))).	34.6	-93.3	1.3
TGTTGTGATGATAATCCGACT	bra-MIR5719-p5_1ss16AC	21	5'	186	266	144	330	bra-MIR5719		chrA03	-	28369284	28369488	tgatccctcttgcttctaaatttttttagatctagTGTTGTGATGATAATCCGATTtccaagatccaaaccaacaagtttctatcgacattatcaacgcatgagtgatggtgaccatgttgaaacttgttgatttggtcatagaagTCGGATTATCATCACAACACAagataaaaaaaaactttttaaaagcaaaagcgggatca	.((((((.(((((((.(((((((((((..((((.((((((((((((((((((((((((...((.(((((.(((((((((((....((((((((((.(((....))).))))))...))))))))))))))).)))))))...)))))))))))))))))))))))).))))..)))))))...)))).)))))..)).)))))).	34.6	-93.3	1.3
ATAAAACCATAATACTGTATACCT	bra-MIR5720-p5_1ss2CT	24	5'	35	41	27	51	bra-MIR5720		chrA09_random	+	177963	178252	aaacttgtaaaagaaaatcatcgtacagttaaaatttctacgataattcattcgaagttttgcaattaatgttatacagatattctaaccaaatcACAAAACCATAATACTGTATACCTatatatctcgtctaaaagctgcatatctagtagtgaaatatataggtatactatacagtattatggttttgtgatttggttggaatatCTGTATAACATTTGCAAAACTttaaatgaattatcgtggaatttttaactgtacgatgattttcttttacgagttttcttctt	((((((((((((((((((((((((((((((((((.(((((((((((((((((..((((((((((...((((((((((((((((((((((((((((((((((((((((((((((((((((((((((.(((.(((..((........))..)))))).))))))))))).....)))))))))))))))))))))))))))))))))))))))))))))))))))))))))..))))))))))))))))).)))))))))))))))))))))))))))))))))).......	26.9	-172.6	2.2
AATGAGGGCTGAATTGGAACGC	bra-MIR9557-p3_1ss13GA	22	3'	220	50	170	62	bra-MIR9557		chrA07_random	-	99265	99452	gccgctttattcttcacttacgcatgctgtctttacagttcacactgaTTTTGCGTTTCAACTCGGTCCtcatttctttataacgaagtggaggaacaaaaagatgttttcagaagaacattgaagaggaagagaatgaaagctgcaagttaaaagaAATGAGGGCTGAGTTGGAACGCaaaatcttt	.........................(((((....))))).......(((((((((((((((((((((((((((((((((.((((...(..(...............(((((((.......)))))))...............)..)..)))))))))))))))))))))))))))))))))))))...	38.8	-64	0.9
AGTTAAAAGTTAAGAGACT	bra-MIR9563a-p3_1ss19AT	19	3'	28	16	22	20	bra-MIR9563a		chrAnn_random	-	9932700	9932850	gaagttagcatgattaatgtgaagttcttAGCGGAATATAAGAACCCGTCTCTtaacttttaactaaaaaaattaagaaccagattcttagcttttttAGTTAAAAGTTAAGAGACAagttattatattttctaagtaccttatcttaaga	.............((((..(((.((.(((((...(((((((.(((..((((((((((((((((((((((((..((((((.....))))))..))))))))))))))))))))))))..))).)))))))..))))).)).)))..))))..	27.2	-49.1	1.2
AGCGGAATATAAGAACTCGTCTCT	bra-MIR9563a-p5_1ss17CT	24	5'	5039	2110	3901	2617	bra-MIR9563a		chrAnn_random	-	9932700	9932850	gaagttagcatgattaatgtgaagttcttAGCGGAATATAAGAACCCGTCTCTtaacttttaactaaaaaaattaagaaccagattcttagcttttttAGTTAAAAGTTAAGAGACAagttattatattttctaagtaccttatcttaaga	.............((((..(((.((.(((((...(((((((.(((..((((((((((((((((((((((((..((((((.....))))))..))))))))))))))))))))))))..))).)))))))..))))).)).)))..))))..	27.2	-49.1	1.2
GTTCATGACTGCATTTTCCACTCT	bol-MIR9409-p3_1ss19TC	24	3'	29	12	22	15	bol-MIR9409		chrC03	-	16958373	16958472	aaaatagaTTGAAAAATACAGTCATGAACaaaataaaaattactctatatatgcagtaatgttttcttttttGTTCATGACTGCATTTTCTACTCTattt	.(((((((.(..(((((.(((((((((((((((.....((((((..........))))))........))))))))))))))).)))))..).)))))))	23	-30.4	1.3
TGGAAGACTTTCCAGACGACT	bol-MIR9410-p3_1ss12TC	21	3'	130	83	101	103	bol-MIR9410		chrCnn_random	+	66749309	66749403	tccagactacttaattataagtcgtctggaaaGTCTACTAAGTCGTCCAGCTGGAAGACTTTCTAGACGACTtaattataagtcgtctgcgaagt	(((((((.(((((....(((((((((((((((((((.(((.((......))))).)))))))))))))))))))....))))).))))).))...	40	-44.4	1.2
[1]Name	1. L-N or L+N mean that the miRNA sequence is N base less or more than known miRNA sequence in the left side.
	2. R-N or R+N mean that the miRNA sequence is N base less or more than known miRNA sequence in the right side.
	3. NssNTA means N substitutin that is T changes to A at position N.
	4. New-stand miRNAs are named as MIR-p5 or MIR-p3.
[2]rep MIR ID	Representative known pre-miRNAs
[3]rep miR ID	Representative known miRNAs
[4]pre-miRNA	pre-miRNA sequences from B. napus genome
[5]SS	Secondary structure
[6]MFEI	Minimal folding energy indexes (MFEI) = -dG*100/pre-miRNA length/CG%

## Sheet: S3.3
Additional file 3: Table S3.3 - Conserved miRNAs were mapped to Brassicaceae pre-miRNAs but these pre-miRNAs were not mapped to B. napus genome, however these miRNAs were mapped to B. napus genome in the WA and TG libraries
1. The reads were mapped to Brassicaceae miRNAs.
Sequence	Name[1]	Length	Type	WA Raw	TG Raw	WA Norm	TG Norm	rep MIR ID[2]	rep miR ID[3]	Genome ID	Strand	Start	End	pre-miRNA[4]	SS[5]	CG%	dG	MFEI[6]
CATGTGCCCATCTTCCCCATC	ath-miR164b-3p_1ss16AC	21	3'	158	172	122	213	ath-MIR164b	ath-miR164b-3p	chrAnn_random	-	145219	145365	AGCAAGATGGAGAAGCAGGGCacgtgcattactatctcatctcttagtccacgtatatatactctccccaaatgcgtgtgtatgatagagatgtgtgtgaagtgtgttgagttagttcttCATGTGCCCATCTTCCCCATCatgacc	..((.(((((.((((..(((((((((....((((.((((.......(..(((...(((((((((((.....((((....))))....)))).)))))))..)))..))))).))))....)))))))))..)))).))))).))...	44.9	-50.7	0.8
ATCATGCGATCTATTTGGATT	ath-miR393b-3p_1ss13CA	21	3'	14	12	11	15	ath-MIR393b	ath-miR393b-3p	chrA09	+	25782324	25782478	actagagaaaggatccaaagggatcgcattgatcctaattaagctgaatttattcccaaataattgttatatttttctcaatctaaagaaaaagtcccaaaaatctgcttcgttttcaggATCATGCGATCTATTTGGATTcatcctttggttgc	(((((((...(((((((((..((((((((.((((((((..((((.((..(((((....)))))(((..((.(((((((........)))))))))..)))...)).))))..))...))))))))))))))..)))))))))...)))))))...	34.2	-46.9	0.9
										chrC08	+	28017186	28017340	actagagaaaggatccaaagggatcgcattgatcctaattaagctgaatttattcccaaataattgttatatttttctcaatctaaagaaaaagtcccaaaaatctgcttcgttttcaggATCATGCGATCTATTTGGATTcatcctttggttgc	(((((((...(((((((((..((((((((.((((((((..((((.((..(((((....)))))(((..((.(((((((........)))))))))..)))...)).))))..))...))))))))))))))..)))))))))...)))))))...	34.2	-46.9	0.9
ATCATGCGATCTCATTGGATT	ath-miR393b-3p_1ss14TA	21	3'	23	18	18	22	ath-MIR393b	ath-miR393b-3p	chrA04	-	2257533	2257691	acagcaactagagaaaggaTCCAAAGGGATCGCATTGATCCaaattaagctgaattattccccaatagttattctttttctcaatcgaaagatgaaaagaagacttgcttcattttctggATCATGCGATCTCATTGGATTcattctttggtagcttcc	..(((.(((((((((.((((((((.((((((((((.(((((((((.((((..((((((......))))))..(((((((.(((.((....))))).)))))))...)))).)))...)))))))))))))))).)))))))).))))))))).)))...	37.1	-66	1.1
										chrC04	-	26232531	26232689	acagcaactagagaaaggaTCCAAAGGGATCGCATTGATCCaaattaagctgaattattccccaatagttattctttttctcaatcgaaagatgaaaagaagacttgcttcattttctggATCATGCGATCTCATTGGATTcattctttggtagcttcc	..(((.(((((((((.((((((((.((((((((((.(((((((((.((((..((((((......))))))..(((((((.(((.((....))))).)))))))...)))).)))...)))))))))))))))).)))))))).))))))))).)))...	37.1	-66	1.1
GAACTCGTCTCTTAATTTTTAACT	bra-miR9563a-5p_L+2R+1_1ss5CT	24	5'	15	3	12	4	bra-MIR9563a	bra-miR9563a-5p	chrC08	+	32721294	32721476	ttggggggttcttagagtggggttcttagcggaatataaGAACTCGTCTCTTAATTTTTAACTaaaaaaactaagaaccggttcttaaataagagttttaaaaaccggttcttaacttttttagttaaaagttaagagacgggtttttatattccgctaaaaatctcactctaagaaccccca	...(((((((((((((((((((((.((((((((((((((((((((((((((((((((((((((((((((..((((((((((((.(((((.......))))).))))))))))))..)))))))))))))))))))))))))))))))))))))))))))).))))))))))))))))))))).	33.9	-122.9	2
1.2. The reads were not mapped to Brassicaceae miRNAs.
Sequence	Name	Length	Type	WA Raw	TG Raw	WA Norm	TG Norm	rep MIR ID	rep miR ID	Genome ID	Strand	Start	End	pre-miRNA	SS	CG%	dG	MFEI
GCAAGTTGACTTTGGCTC	ath-MIR169e-p3_L+1	18	3'	150	17	116	21	ath-MIR169e		chrC06	+	7025794	7025893	agaatgatattgagccaaagatgacttgccgactataccaaccaatctcatgaaactgatattggtgaccgGCAAGTTGACTTTGGCTCtttatcatgag	...((((((..(((((((((..(((((((((.........((((((.(((......))).))))))...)))))))))..)))))))))..))))))...	41	-43.8	1.1
GGAACTCGGATTATCATCACAACA	bra-MIR5719-p3_1ss5GC	24	3'	103	58	80	72	bra-MIR5719		chrA03	+	28369310	28369470	ttttttttatcttgtgttgtgatgataatccgacttctatgaccaaatcaacaagtttcaacatggtcaccatcactcatgcgttgataatgtcgatagaaacttgttggtttggatcttGGAAATCGGATTATCATCACAACActagatctaaaaaaatt	((((((..((((.((((((((((((((((((((.(((((.(((((((((((((((((((..((((((.......)).)))).((((((...)))))).))))))))))))))))).)).))))).)))))))))))))))))))).))))..))))))...	33.5	-76.9	1.4
										chrC07_random	+	2907278	2907437	aaaagtttttttgatcttgtgttgtgatgataatccgactccattactaaaatcaactagtttcaccatgactcatgctttgatgatgttgattagaaacttgttggtttgggtcttGGAACTCGGATTATCATCACAACActagatctaaaaaattaag	...((((((((.(((((.((((((((((((((((((((.((((..((..((((((((.((((((.....(((((((......)))).))).....)))))).))))))))..))..))))..)))))))))))))))))))).))))).))))))))...	33.1	-71.1	1.3
AACAGAATATAAGAACTCGTCTCT	bra-MIR9563b-p5_1ss6GA	24	5'	50	12	39	15	bra-MIR9563b		chrC05	+	36323889	36324017	AACAGAATATAAGAACCCGTCTCTtaacttttaactaaaaatgctaagaaccagttcttaaataagagtttaagagctggttcttaacctttttagttaaaagttaagagacgggttcttatattccgc	....(((((((((((((((((((((((((((((((((((((...(((((((((((((((((((....)))))))))))))))))))...)))))))))))))))))))))))))))))))))))))...	31.8	-81.1	2
AATACTTAGGCTCTCTCTAGG	bra-MIR9566-p5	21	5'	15	3	12	4	bra-MIR9566		chrA01	+	4545425	4545547	ttgttgacaAATACTTAGGCTCTCTCTAGGtaaaagaatcatcatatcttttagtttgtagtagctgtctttaacactaaaagatatgatgattcttttacctagagagagcctaagtatnnn	..........(((((((((((((((((((((((((((((((((((((((((((((....((.......)).....)))))))))))))))))))))))))))))))))))))))))))))...	30.9	-73	1.9
[1]Name	1. L-N or L+N mean that the miRNA sequence is N base less or more than known miRNA sequence in the left side.
	2. R-N or R+N mean that the miRNA sequence is N base less or more than known miRNA sequence in the right side.
	3. NssNTA means N substitutin that is T changes to A at position N.
	4. New-stand miRNAs are named as MIR-p5 or MIR-p3.
[2]rep MIR ID	Representative known pre-miRNAs
[3]rep miR ID	Representative known miRNAs
[4]pre-miRNA	pre-miRNA sequences from B. napus genome
[5]SS	Secondary structure
[6]MFEI	Minimal folding energy indexes (MFEI) = -dG*100/pre-miRNA length/CG%
