# Supplementary material for: Identification of miRNAs and their targets in transgenic Brassica napus and its acceptor (Westar) by high-throughput sequencing and degradome analysis
Source: Royal Society of Chemistry journal article supplement (doi:10.1039/c5ra14672k), 2015-01-01
Supplement: c5ra14672k5.xlsx [file c5ra14672k5.xlsx]

## Sheet: Sheet1
Additional file 4: Table S4 - Data Comparison of conserved miRNAs in the WA and TG libraries
miRNA Family	miRNA Groups	Name[1]	Sequence	WA Norm	TG Norm	Log2 Ratio[2]
miR156	Con-BN	bna-miR156b,c,g	TTGACAGAAGATAGAGAGCAC	120	101	0.25
		bna-MIR156b-p3	GCTCTCTATACTTCTGTCACC	125	143	-0.19
		bna-MIR156c-p3	GCTCTCTATACTTCTGTCAATA	16	3	2.42**
		bna-miR156d,e,f,a_R-1	TGACAGAAGAGAGTGAGCAC	291	81	1.85**
		bna-miR156e_R+1	TGACAGAAGAGAGTGAGCACT	3496	687	2.35**
		bna-MIR156e-p3	GCTCACCTCTCTTTCTGTCAGT	111	175	-0.66
		bra-miR156f-3p_L-1	GCTCACTGCTCTTTCTGTCAGA	10	11	-0.14
	Con-BA	bra-miR156a-3p, ath-MIR156e-p3	GCTTACTCTCTCTCTGTCACC	83	115	-0.47
miR158	Con-BA	bra-miR158-3p	TTTCCAAATGTAGACAAAGCA	18164	26437	-0.54
		bra-miR158-5p	CTTTGTCTATCGTTTGGAAAAG	11274	14289	-0.34
miR159	Con-BN	bna-miR159	TTTGGATTGAAGGGAGCTCTA	29676	18564	0.68
		bna-MIR159-p5	AGCTGCTAAGCTATGAATCCC	1078	472	1.19**
	Con-BA	ath-MIR159a-p5, aly-MIR159a-p5	AGCTGCTAAGCTATGGATCCC	1476	867	0.77
		aly-MIR159a-p3_1ss15CT	TGGCTTGCATATCTTAGGAGC	155	135	0.2
miR160	Con-BN	bna-miR160a,b,c,d	TGCCTGGCTCCCTGTATGCCA	104	366	-1.82**
		bna-MIR160c-p3,d-p3	GCGTACAGAGTAGTCAAGCATG	58	33	0.81
miR161	Con-BN	bna-miR161	TCAATGCACTGAAAGTGACTA	67	61	0.14
		bna-MIR161-p3	GTCACTTTCAATGCGTTGATC	960	818	0.23
miR162	Con-BN	bna-MIR162a-p5	GGAGGCAGCGGTTGATCGATC	241	91	1.41**
	Con-BA	bra-miR162-3p	TCGATAAACCTCTGCATCCAG	2464	2548	-0.05
		bra-miR162-5p	GGAGGCAGCGGTTCATCGATC	122	78	0.65
miR164	Con-BN	bna-miR164a	TGGAGAAGCAGGGCACGTGCA	100	149	-0.58
		bna-miR164b,c,d	TGGAGAAGCAGGGCACGTGCG	17	30	-0.82
		bna-MIR164b-p3,c-p3,d-p3	CACGTGTTCTACTACTCCAAC	19	16	0.25
	Con-BA	bra-miR164e-3p	CACGTGCTCCCCTCCTCCAAC	3	14	-2.22**
	Con-N	ath-miR164b-3p_1ss16AC	CATGTGCCCATCTTCCCCATC	122	213	-0.8
miR166	Con-BN	bna-miR166a,b,c,d,e	TCGGACCAGGCTTCATTCCCC	131410	213973	-0.7
		bna-MIR166a-p5	GGAATGTTGTTTGGCTCGAAG	257	136	0.92
		aly-miR166a-5p	GGAATGTTGTCTGGCTCGAGG	3809	2522	0.59
		bna-MIR166d-p5	GGACTGTTGTCTGGCTCGAGG	751	643	0.22
		bna-MIR166e-p5_1ss5AT	GGGATTGTTGTCTGGCACGAGG	331	203	0.71
		bna-miR166f	TCGGACCAGGCTTCATCCCCC	36772	59919	-0.7
		bna-MIR166f-p5_1ss16TC	GGAATGTTGTCTGGACCGAGG	152	108	0.49
	Con-BA	aly-miR166b-3p_L+1	TTCGGACCAGGCTTCATTCCCC	1859	2380	-0.36
		aly-miR166b-5p_L+2	GGGGACTGTTGTCTGGCTCGAGG	8	11	-0.46
		aly-miR166b-5p_L+2R+1	GGGGACTGTTGTCTGGCTCGAGGA	54	53	0.03
miR167	Con-BN	bna-miR167a_R-1,b_R-1,c	TGAAGCTGCCAGCATGATCTA	858	642	0.42
		bna-MIR167a-p3,b-p3	GATCATGTTCGCAGTTTCACC	526	793	-0.59
		bna-MIR167c-p3	GATCATGTTCGTAGTTTCACC	4435	3639	0.29
		bna-MIR167d-p3	AGATCATCCTGCGGCTTCATT	164	133	0.3
miR168	Con-BN	bna-miR168a	TCGCTTGGTGCAGGTCGGGAA	2131	1828	0.22
		bna-MIR168a-p3	CGGATCCCGCCTTGTATCAAG	29	45	-0.63
		bna-MIR168b-p5	CTCGGATTCGCTTGGTGCAGG	8	10	-0.32
	Con-BA	bra-miR168b-3p,c-3p	CCCGCCTTGCATCAACTGAAT	87	229	-1.40**
		bra-miR168b-5p,c-5p	TCGCTTGGTGCAGGTCGGGAC	3475	3766	-0.12
miR169	Con-BN	bna-miR169a,b	CAGCCAAGGATGACTTGCCGA	13	10	0.38
		bna-MIR169a-p3_1ss8TC	GGCAAGTCGTCCTTGGCTATA	146	86	0.76
		bna-MIR169c-p3,d-p3,e-p5,i-p3	GGCAGTCTCCTTGGCTATC	12	10	0.26
		bna-miR169g_R-1,h_R-1,i_R-1,j_R-1,k_R-1	TAGCCAAGGATGACTTGCCTG	12	12	0
		bna-MIR169h-p3,k-p3	GGCAGTCTCCTCGGCTATT	17	30	-0.82
		bna-miR169m	TGAGCCAAAGATGACTTGCCG	122	63	0.95
		bna-MIR169m-p3	GCAAGTCGACTTTGGCTCTG	139	30	2.21**
		bna-miR169n	CAGCCAAGGATGACTTGCCGG	27	14	0.95
		bna-miR169n_R+3	CAGCCAAGGATGACTTGCCGGAGG	14	9	0.64
	Con-BA	ath-miR169b-3p_R-1	GGCAAGTTGTCCTTCGGCTAC	113	92	0.3
		aly-MIR169b-p3	ATTTCTGGCAAGTTGTCCTTCGGCT	110	87	0.34
	Con-N	ath-MIR169e-p3_L+1	GCAAGTTGACTTTGGCTC	116	21	2.47**
miR171	Con-BN	bna-miR171f,g	TGATTGAGCCGCGCCAATATC	233	150	0.64
		bna-miR171f,g_1ss12TC	TGATTGAGCCGCGTCAATATC	381	214	0.83
		ath-miR171-5p, bna-MIR171g-p5	TATTGGCCTGGTTCACTCAGA	124	19	2.71**
		aly-miR171b-5p, bna-MIR171a-p5,b-p5	AGATATTAGTGCGGTTCAATC	270	158	0.77
miR172	Con-BN	bna-miR172a	AGAATCTTGATGATGCTGCAT	597	686	-0.2
		aly-miR172b-5p	GCAGCACCATCAAGATTCACA	109	135	-0.31
		bna-miR172b,c	GGAATCTTGATGATGCTGCAT	32	30	0.09
		bna-miR172a_R-1,d_R-1	AGAATCTTGATGATGCTGCA	32	51	-0.67
	Con-BA	bra-miR172b-5p	GCAGCACCATTAAGATTCACA	65	56	0.22
		aly-MIR172a-p5_1ss2CT	GTTGTTTGCTGCTGTGGCATC	15	26	-0.79
miR319	Con-BA	bra-miR319-3p, ath-miR319a,b, aly-miR319a-3p,b-3p	TTGGACTGAAGGGAGCTCCCT	26	25	0.06
		ath-miR319c, aly-miR319d-3p	TTGGACTGAAGGGAGCTCCTT	21	28	-0.42
miR390	Con-BN	bna-miR390a,b,c	AAGCTCAGGAGGGATAGCGCC	815	408	1.00**
		ath-miR390a-3p_R-1_1ss5AG	CGCTGTCCATCCTGAGTTTC	546	1043	-0.93
		bna-MIR390c-p3	CGCTATCCATCCTGAGTTCC	22	19	0.21
miR391	Con-BA	bra-miR391-3p	ACGGTATCTCTCCTACGTAGC	77	172	-1.16**
		bra-miR391-5p	TTCGCAGGAGAGATAGCGCCA	99	128	-0.37
miR393	Con-BN	bna-miR393_R+1	TCCAAAGGGATCGCATTGATCC	56	143	-1.35**
	Con-N	ath-miR393b-3p_1ss13CA	ATCATGCGATCTATTTGGATT	11	15	-0.45
		ath-miR393b-3p_1ss14TA	ATCATGCGATCTCATTGGATT	18	22	-0.29
miR394	Con-BN	bna-miR394a_L+1,b_L+1	TTTGGCATTCTGTCCACCTCC	108	92	0.23
miR395	Con-BN	bna-miR395a,b,c	CTGAAGTGTTTGGGGGAACTC	3	10	-1.74
		bra-miR395a-5p,c-5p,ban-MIR395b-p5	GTTCCTCTGAGCACTTCATTG	23	74	-1.69**
		bna-MIR395e-p5	GTTCCCTGAAACGCTTCATTG	9	11	-0.29
miR396	Con-BN	bna-miR396a_1ss21TG	TTCCACAGCTTTCTTGAACTG	22401	24363	-0.12
		ath-miR396a-3p	GTTCAATAAAGCTGTGGGAAG	440	453	-0.04
miR398	Con-BA	bra-miR398-3p	TGTGTTCTCAGGTCACCCCTG	3207	39219	-3.61**
		bra-miR398-5p	GGGTCGACATGAGAACACATG	21	143	-2.77**
		bol-miR398a-3p_R-1	TGTGTTCTCAGGTCACCCCT	35	366	-3.39**
miR399	Con-BN	bna-miR399a_1ss13TG,b_1ss13TG	TGCCAAAGGAGAGTTGCCCGG	11	7	0.65
		bna-MIR399c-p5	AGGGCAAGATCTCCTTTGGC	18	4	2.17**
	Con-BA	ath-miR399c-3p	TGCCAAAGGAGAGTTGCCCTG	3183	1257	1.34**
		ath-miR399c-5p_1ss20GC	GGGCATCTTTCTATTGGCACG	18	15	0.26
miR400	Con-BA	bra-miR400-3p	GACTTATAATGATCTCATGAA	19	35	-0.88
		bra-MIR400-p5	GAGAAGTTGCTGAAGATTGTTT	200	141	0.5
miR403	Con-BN	bna-miR403	TTAGATTCACGCACAAACTCG	8430	10001	-0.25
		bna-MIR403-p5	TGTTTTGTGCGTGAATCTAATT	55	95	-0.79
miR824	Con-BN	bna-miR824	TAGACCATTTGTGAGAAGGGA	610	718	-0.24
		bna-MIR824-p3	CCTTCTCATCGATGGTCTAGA	2537	4809	-0.92
miR860	Con-BN	bna-miR860	TCAATACATTGGACTACATAT	5	19	-1.93
miR1140	Con-BN	bna-miR1140	ACAGCCTAAACCAATCGGAGC	6607	3771	0.81
		bna-MIR1140-p5	TCCGATTGGCTTTAGGCTGTT	1526	671	1.19**
miR1885	Con-BA	bra-miR1885b	TACATCTTCTCCGCGGAAGCTC	8990	8240	0.13
		bra-MIR1885b-p5	CAGAGTCTTTCTAAGTCACACTC	529	668	-0.34
miR2111	Con-BN	bra-miR2111-3p	GACCTCAGGATGCGGATTACC	22	21	0.07
miR5654	Con-BA	bra-miR5654a	ATAAATCCCAAGCATCATCCA	84	192	-1.19**
		bra-MIR5654a-p3	GATGATGCTTGGGATTTATTT	22	19	0.21
miR5712	Con-BA	bra-miR5712	AATATTAATATAATTGGTGAG	12	2	2.58**
miR5717	Con-BA	bra-miR5717_L+1R-1	AGTTTGGATTGTTTGCCTTGG	32	47	-0.55
miR5718	Con-BA	bra-miR5718	TCAGAACCAAACACAGAACAAG	43	84	-0.97
		bra-MIR5718-p5_1ss13AG	TGTTCTGGTTTGGTTTTGAAC	392	383	0.03
miR5719	Con-BA	bra-MIR5719-p3_1ss21AT	TCGGATTATCATCACAACACT	949	1608	-0.76
		bra-MIR5719-p5_1ss16AC	TGTTGTGATGATAATCCGACT	144	330	-1.20**
	Con-N	bra-MIR5719-p3_1ss5GC	GGAACTCGGATTATCATCACAACA	80	72	0.15
miR5720	Con-BA	bra-MIR5720-p3	CTGTATAACATTTGCAAAACT	29	47	-0.7
		bra-MIR5720-p5_1ss2CT	ATAAAACCATAATACTGTATACCT	27	51	-0.92
miR5721	Con-BA	bra-miR5721_L+1R+2	AAAAAATGGAGTGAGAAATGGAGT	17	5	1.77
miR5723	Con-BA	bra-MIR5723-p5	CTTCCACCTTCGTGAAATGTG	63	45	0.49
miR5725	Con-BA	bra-MIR5725-p3	TGGCACAATCTGATCTGCATC	51	48	0.09
		bra-MIR5725-p5	ATACGATGCAGATCAGATTGTGCC	44	35	0.33
miR6028	Con-BN	bna-miR6028_R+2	TGGAGAGTAAGGACATTCAGATC	176	72	1.29**
		bna-MIR6028-p3	TGAATGTCTTTCTCTTCATC	265	273	-0.04
miR6029	Con-BN	bna-miR6029	TGGGGTTGTGATTTCAGGCTT	204	375	-0.88
miR6030	Con-BN	bna-miR6030	TCCACCCATACCATACAGACCC	93	370	-1.99**
		bna-MIR6030-p5	GTCTGTATGTGTGGGCTGAGT	516	460	0.17
miR6031	Con-BN	bna-miR6031	AAGAGGTTCGGAGCGGTTTGAAGC	375	118	1.67**
		bna-MIR6031-p3	TGTTTCGAAACGCTGTCAACCGCT	149	105	0.5
miR9408	Con-BA	bol-MIR9408-p5	AGATGGAAAATGTTTTTGACT	7	11	-0.65
miR9409	Con-BA	bol-MIR9409-p3_1ss19TC	GTTCATGACTGCATTTTCCACTCT	22	15	0.55
miR9410	Con-BA	bol-MIR9410-p3_1ss12TC	TGGAAGACTTTCCAGACGACT	101	103	-0.03
		bol-MIR9410-p5	GTCTACTAAGTCGTCCAGCTGG	138	89	0.63
miR9555	Con-BA	bra-miR9555a-3p_L-1R+1	TTCCCGTAAAGCTTAGAACCC	33	25	0.4
miR9557	Con-BA	bra-miR9557-5p	TTTTGCGTTTCAACTCGGTCC	336	339	-0.01
		bra-MIR9557-p3_1ss13GA	AATGAGGGCTGAATTGGAACGC	170	62	1.46**
miR9558	Con-BA	bra-miR9558-5p	AGAGATGTCTGGCTTGCAACA	200	164	0.29
miR9562	Con-BA	bra-MIR9562-p5	CACTGTAAAATGGAGTGGACT	5	10	-1
miR9563	Con-BA	bra-MIR9563a-p3_1ss19AT	AGTTAAAAGTTAAGAGACT	22	20	0.14
		bra-MIR9563a-p5_1ss17CT	AGCGGAATATAAGAACTCGTCTCT	3901	2617	0.58
	Con-N	bra-miR9563a-5p_L+2R+1_1ss5CT	GAACTCGTCTCTTAATTTTTAACT	12	4	1.58
		bra-MIR9563b-p5_1ss6GA	AACAGAATATAAGAACTCGTCTCT	39	15	1.38**
miR9566	Con-N	bra-MIR9566-p5	AATACTTAGGCTCTCTCTAGG	12	4	1.58
miR9568	Con-BA	bra-miR9568-5p_L-3R+2	GGATATCTTAGGATGAGGTTC	29	11	1.40**
[1]Name	Name regulation following Additional file 3: Table S3; red marked miRNAs were detected in degradome analysis.
[2]Log2 Ratio	Log2 (WA Norm/TG Norm); ** indicates highly significant variation (p-value < 0.01 in both Chi-square 2×2 & Fisher-exact test and |log2(WA/TG)|≥1) between the WA and TG libraries.
