# Supplementary material for: Identification of miRNAs and their targets in transgenic Brassica napus and its acceptor (Westar) by high-throughput sequencing and degradome analysis
Source: Royal Society of Chemistry journal article supplement (doi:10.1039/c5ra14672k), 2015-01-01
Supplement: c5ra14672k6.xlsx [file c5ra14672k6.xlsx]

## Sheet: Sheet1
Additional file 5: Table S5 - Novel miRNAs in the WA and TG libraries
Sequence	Name[1]	Length	Type	WA Raw	TG Raw	WA Norm	TG Norm	Genome ID	Strand	Start	End	pre-miRNA[2]	SS[3]	CG%	dG	MFEI[4]
TACGTTTAAGTCGTCCAGGGTC	PC-3p-1	22	3'	26	18	20	22	chrC04	-	47896388	47896590	tagtatcaaatccagggttaactagttgtccagacgactgtaaaagttgtctggacgactagTTGACCCTGGACGACTTAAAAttaagtcttccgtggtcaactagtcgtccagacaactTACGTTTAAGTCGTCCAGGGACaactagtcgtccagacaacttttacagtcgtctggacaactagttaaccctggatttgata	...((((((((((((((((((((((((((((((((((((((((((((((((((((((((((((((.((((((((((((((((..(((((..((..(((............)))))..)))))..)))))))))))))))).))))))))))))))))))))))))))))))))))))))))))))))))))))))))))))))	43.3	-152.6	1.7
								chrC09	-	41534402	41534604	tagtatcaaatccagggttaactagttgtccagacgactgtaaaagttgtctggacgactagTTGACCCTGGACGACTTAAAAttaagtcttccgtggtcaactagtcgtccagacaactTACGTTTAAGTCGTCCAGGGACaactagtcgtccagacaacttttacagtcgtctggacaactagttaaccctggatttgata	...((((((((((((((((((((((((((((((((((((((((((((((((((((((((((((((.((((((((((((((((..(((((..((..(((............)))))..)))))..)))))))))))))))).))))))))))))))))))))))))))))))))))))))))))))))))))))))))))))))	43.3	-152.6	1.7
AGACTCAGACTCAGCCGCAGCCGC	PC-3p-2	24	3'	30	15	23	18	chrC08	-	26353709	26353943	acttatatagttgggcggttcgtttcattgacgcaggttcctgcggctgcGTCTGCGGCTGAGTCTGAGTCTGCggttgcggtcattcgtttggttgttgttcgttttgcagccgcAGACTCAGACTCAGCCGCAGACGCagccgcaacttgttgttcgtttcaaaaacgcaggacattgccgcagccgcagacgcagaaagtagatttaattctgttcgtttggttgccgcaga	.........(((..(((............(((((((((...((((((((((((((((((((((((((((((((((((((((......((..(.......)..))...)))))))))))))))))))))))))))))))))))))))))))))).)))...........)))..))).((((.(((((((..((.((((((...........))))))))...))))))).)))).	52.8	-122.9	1
GTTTAGAACTCCGCAATTACATA	PC-3p-3	23	3'	17	4	13	5	chrC09	+	43877035	43877255	agagcaaccttgtcgggagtttctgctcctaggttcttaaaatacatatatgtgtatgtatatattatataggcgtATGTAATTGCCGGGTTCTTAAACTttcggttgggttcacgtaaaGTTTAGAACTCCGCAATTACATAcgcctatataatatatacatacacatatatgtattttaagaacctaggagcagaaactcccgacaaggttgctcttgc	((((((((((((((((((((((((((((((((((((((((((((((((((((((((((((((((((((((((((((((((((((((.(((((((.(((((((((..........)).)))))))))))))).))))))))))))))))))))))))))))))))))))))))))))))))))))))))))))))))))))))))))))))))))))))...	37.1	-169.4	2.1
AACCACGTCATAAGAACCCCGAGT	PC-3p-4	24	3'	22	13	17	16	chrC09	-	34645612	34645739	aaacggctaaaaccatgattaACTCGGGGTTTTTAGAATGAAGTTtttatcgaaagttaagaaactgttccttaacttccggtaaaAACCACGTCATAAGAACCCCGAGTtaatcatgctttagagct	....((((.(((.((((((((((((((((((((((..(((..((((((((((.((((((((.........)))))))).))))))))))..)))..)))))))))))))))))))))).)))..))))	36.7	-60.3	1.3
TTGTAGAATTTTGGGAAGGGC	PC-3p-5	21	3'	68	27	52	33	chrC05_random	-	138704	138797	atatcatagtagtTGCCCTTCCCAAAATTCTACAattagaattaaactatatcttgtaaTTGTAGAATTTTGGGAAGGGCgactactatgaaat	...(((((((((((((((((((((((((((((((((((.((............)).)))))))))))))))))))))))))))))))))))...	30.9	-57.8	2
								chrC05_random	+	138749	138842	atttcatagtagtCGCCCTTCCCAAAATTCTACAattacaagatatagtttaattctaaTTGTAGAATTTTGGGAAGGGCaactactatgatat	...((((((((((.((((((((((((((((((((((((.((............)).)))))))))))))))))))))))).))))))))))...	30.9	-52.7	1.8
TGAGATATGAAGTTGAGTTGGAAC	PC-3p-6	24	3'	24	2	19	2	chrC02	-	14657305	14657496	aattgcttcaaaccaactctatatctcactttgtaatggagtaatgaacaaacaaaaaatagattactctatttatagagtaaactccattatggcgTGAGATATGGAGTTGAGTTGGAACatttcttatttcatacttcatttcactccattttagagtaaaaattggagtgggctggagatgcttaagtc	...((.(((((..((((((((((((((((...((((((((((..((......)).........((((((((....))))))))))))))))))...))))))))))))))))..))))).))...((((...(((.(((((..((((((((.(((.......))).))))))))..))))))))..))))..	32.8	-69	1.1
AATTCCGTTGGAAAATCCTGA	PC-3p-7	21	3'	13	4	10	4	chrC09	+	7523435	7523552	cgacgaaagtattctgtcAGGATTTTCCGACGCAGTTCCgacgaatttgccgaaatagatttccgacaagttttcgtcggAATTCCGTTGGAAAATCCTGAccgattttttttcggtc	...((((((...((.(((((((((((((((((.((((((((((((((((.((.((.....)).)).)))))..))))))))))).))))))))))))))))).))....))))))...	44.1	-57.2	1.1
								chrC04	+	22081692	22081842	acgaaagtattctgtcAGGATTTTCCGACGCAGTTCCgacgaatttgccgaaatagatttccgacaagttttcgtcggAATTCCGTTGGAAAATCCTGAtcgattttttcggtcggtttttccgtcggtattgtccgtgttttcttgtagt	.((((((...((..((((((((((((((((.((((((((((((((((.((.((.....)).)).)))))..))))))))))).))))))))))))))))..))..))))))..(((.....))).(((......)))..............	43	-59.8	0.9
AGAGTGAACCATTTGAACAAATCT	PC-3p-8	24	3'	14	3	11	4	chrC03	-	47540424	47540578	atagagttgaatttgctctaatggttcactctataatagagtgaaatatagactaatgttgtttttttactccaaatatagagtgaaaaatcaacattactctatattttactctattatAGAGTGAACCATTTGAACAAATTTaactctataat	(((((((((((((((.((.(((((((((((((((((((((((((((((((((.((((((((.((((((((((........)))))))))).)))))))).))))))))))))))))))))))))))))))))).)).)))))))))))))))...	25.2	-89.6	2.3
GCTTTCCCCGGACGACTTTAAATT	PC-3p-9	24	3'	236	382	183	473	chrC03	+	58389386	58389636	tgaaatttaactttctatagacgacttagatgaaagtcgtccagctaaacGACTTAATTTAAGGTCGTCCGGGAtaagcaaggtttgaccagaaaattgggaaaaattctggacgactttGCTTTCCCCGGACGACTTTAAATTaagtcttctggagggacgactttatattaagtcgtctggttaaagttaaattatgaagttttatttttcaattacaaaactaaccttaggacgacttacacgtaagt	...(((((((((((...((((((((((((...((((((((((..(((...(((((((((((((((((((((((..((((((((((...((((((..((....))..))))))..))))))))))..)))))))))))))))))))))))...)))..))))))))))...))))))))))))...))))))))))).(((((.......))))).......................(((((....)))))	35.9	-109.1	1.2
								chrC05	+	27334577	27334822	tgaaatttaactttctccagacgacttagatgaaagtcgtccagctaaacGACTTAATTTAAGGTCGTCCGGGAtaagcaaggtttgaccagaaaattgggaaaaattctggacgactttGCTTTCCCCGGACGACTTTAAATTaagtcttctggagagacgactttatattaagtcgtctggttaaagttaaattatgaagttttatttttcaattacaaaactaacctaggacgacttacacgt	...(((((((((((..(((((((((((((...(((((((((...(((...(((((((((((((((((((((((..((((((((((...((((((..((....))..))))))..))))))))))..)))))))))))))))))))))))...)))...)))))))))...)))))))))))))..))))))))))).(((((.......)))))................................	36.6	-107.8	1.2
TTCCGCTAAGAACTCCACCTTAAT	PC-3p-10	24	3'	17	16	13	20	chrA07	-	7840441	7840628	tgggaggttcttaaggtgaggttcttatcggaatataagaacctgtctcttagcttttttagttaaagttaagagacgggttcttataTTCCGCTAAGAACTCCACCTTAAGaccatcattaaccccagtctcttaacaggagttcttagcttcgaataaaagacagttcttagcttttcttagacgg	.(..((((((((((((((..(((((((.(((((((((((((((((((((((((((((.......))))))))))))))))))))))))))))).)))))))..))))))))))...............((((.(((...(((((.....)))))...))).))))........))))..)........	38.8	-86.8	1.2
AATTTCCGCTAAGAACCTCATCCT	PC-3p-11	24	3'	43	10	33	12	chrC02	+	14775856	14776008	tttaggtttttatgaaaggaagagcataattaatccggggtttttagAGTAGGGTTCTTAGCGGAAGTTAAgaaactatttcttAATTTCCGCTAAGAACCTCATCCTaagaatcctgggttaatcatgctctaaattgtttaaaggtcttct	...((..(((((...((...(((((((.(((((((((((((((((((..(..(((((((((((((((((((((((...)))))))))))))))))))))))..)..))))))))))))))))))).)))))))...))...)))))..))...	34.6	-77.7	1.5
								chrC09	+	47035234	47035457	agtacaaattttggttggttcacatagcagtgctttatcctttcgagcaccattaagaccatgattaatccggggttcttAAAGTGGAGTTCTTAGCGGAAGTTaagaaacagtttcttAATTTCCGCTAAGAACCTCATCCTaagaacttcgggttaatcatgttctaagtaaccctctagaacgatcattactgttgataagagtttctcaagatttgtttt	...(((((((((((..(..((...((((((((....(((.(((.(((....(((.(((.(((((((((((((..(((((((..(((..((((((((((((((((((((((...))))))))))))))))))))))..)))..)))))))..))))))))))))).))).)))....))).)))..)))...))))))))....))..)..)))))))))))...	37.1	-91.7	1.1
AATACCTGCGGATGTCCGGATCCG	PC-3p-12	24	3'	19	7	15	9	chrCnn_random	-	23341500	23341653	ggacggatcggatatccggggtattttgagatatccggatccggatccggactcgccggatccgtaaaattgctatccggatccggattcgggctctccggatatccggactaaaatccgAATACCTGCGGATGTCCGGATCCGgatccttttt	((((((((((((((((((((((((.....((((((((((((((((((((((....((((((..(((....))).)))))).))))))))))))...))))))))))((((......)))).)))))).)))))))))).)))))..))).....	53.9	-82	1
GAGATATGAAGTTGGGTTGAAAC	PC-3p-13	23	3'	27	4	21	5	chrA09	-	14649482	14649651	agtaaaagtgaatatgaagtaaaaatgctccaatcctactttatttttcactccataatagagtgatgaacaaacaaaaaattaattactccatttatggagtaaagttcattatggagtGAGATATGAAGTTGGGTTGGAACattcattactttatattcacttttttt	...(((((((((((((((((((.((((.((((((((.(((((((.((((((((((((((.((((.....))..............((((((((....))))))))...)))))))))))))))).))))))).)))))))).))))..)))))))))))))))))))...	27.6	-73.6	1.6
ATTAAGGACCCAAGACCAAGGACC	PC-3p-14	24	3'	32	26	25	32	chrA02	-	12375823	12375992	actgctaaatgcatgattattggaggtccttgctcttgggtcattaatacatatatatttgtatgtatatattatatacgtatatataatatatacatacaaatatatgtgtATTAAGGACCCAAGACCAAGGACCcccaataatcatgctcttagttttgtgtttgact	...(((((..(((((((((((((.((((((((.(((((((((.(((((((((((((((((((((((((((((((((((....))))))))))))))))))))))))))))))))))).))))))))).)))))))).)))))))))))))..))))).............	30.6	-99.7	1.9
TATCCCGGACGACCTTAAATT	PC-3p-15	21	3'	270	191	209	237	chrC01	+	13296560	13296734	tttaaccagacgacttaatataaagtcgtccctccagaagacttAATTTAAAGTCGTCCGGGGAAAGCaaagtcgtccagaatttttcccaattttctggtcaaaccttgctTATCCCGGACGACCTTAAATTaagtcgtttagctggacgactttcatctaagtcgtctggaga	.....((((((((((((....((((((((((........((((((((((((.((((((((((..((((((.((...((((((..((....))..))))))....)).))))))..)))))))))).))))))))))))........))))))))))....))))))))))))...	41.7	-88.4	1.2
AACTTCCGCTAAGAACCACATCCT	PC-3p-16	24	3'	61	32	47	40	chrC04	+	47882350	47882484	tattgtataactttgaccatgattaacctagaattcttAGAGTGGAGTTTTTAGCGGAAGTTaagaaactgtttcttAACTTCCGCTAAGAACCACATCCTaagaacttcaggttaatcatgctcttatacacaa	...(((((((....((.((((((((((((.((((((((((..((..((((((((((((((((((((((...))))))))))))))))))))))..))..))))))).))))))))))))))).)))))))))...	34.1	-67	1.5
GAGATATGAAGTTGGGTTT	PC-3p-17	19	3'	18	0	14	0	chrC01_random	+	4347298	4347407	ccaaccaaacttcatatcttattccataatagtgtttattccataaatagagtaatctatttttttttgttcattactctattatgaaatGAGATATGAAGTTGGGTTTa	..((((.((((((((((((((((.((((((((.((..((.....(((((((....)))))))......)).....)).)))))))).)))))))))))))))).))))..	25.5	-39.9	1.4
ATCAGAGATTTCGGCCGTAAATTC	PC-3p-18	24	3'	19	2	15	2	chrCnn_random	+	71949138	71949320	tgagtcaacgaatctcgacctgcctataaaatcttcggcgaatttacggcaaaaatctctgaagttcgtaccggtagactctccaatgaacgatcgcaggagagtctatcggtataaacATCAGAGATTTCGGCCGTAAATTCgctagaaattttatttgcaggtcgagattcattggcctaa	...(((((.((((((((((((((..(((((((.((..(((((((((((((..((((((((((.(((..((((((((((((((((..(((....)))..))))))))))))))))..))).))))))))))..)))))))))))))..)).)))))))..)))))))))))))).)))))....	42.6	-113.4	1.5
ATTTTCCGAGGAACTCCATTCCCT	PC-3p-19	24	3'	14	10	11	12	chrA01	+	5253490	5253647	ccctcggaattttccgagggagtggagtttctcggaaaattccgaggaactttttccctcagaaaattccgaggaacttaaagttcgtcggaatttaccgaggggagaaagttcctcggaATTTTCCGAGGAACTCCATTCCCTcggaattttgaaaa	...((..(((..((((((((((((((((((((((((((((((((((((((((((((((((...(((((((((.((((.....)))).)))))))))...)).)))))))))))))))))))))))))))))))))))))))))))))))))..))...	45.6	-110.9	1.5
ATTCCGACAAGAACTCCGCCCT	PC-3p-20	22	3'	132	171	102	212	chrC05	+	27836275	27836465	agagtatgattaatgggggttcttagggtgggtttttatcggaatataagaatccgtctcttaacttttaaccaaaacaactaagaaccggcttttaaatattaagagacgtgttcttatATTCCGACAAGAACTCCGCCCTaaaaactcccattaattatgctctaaggttcactgagagcttatgctct	(((((((((((((((((((((.(((((((((((((((.((((((((((((((..((((((((((..(((((((................))...)))))..))))))))))..)))))))))))))).)))))).))))))))).)))))))))))))))))))))...........(((((....)))))	37.2	-97.2	1.4
ATATTCCGCTAAGAACTTCATTCT	PC-3p-21	24	3'	15	4	12	5	chrC08	-	15250437	15250617	aagttaccttttagagcatgattaatattgggttAGAGTAGAGTTCTTAGCAGAATAtaagaaattgtcttttaacttagtaaaaaaaatttttagccggttcttaactttttttttcttATATTCCGCTAAGAACTTCATTCTaagaactctcattaatcatgctctaagaccgcttacg	((((....((((((((((((((((((...((((((((((..((((((((((.((((((((((((.........((((...((((((...))))))...))))............)))))))))))).))))))))))..))))))...))))..))))))))))))))))))..))))...	29.8	-62.8	1.2
TTATCCCGGACGACCTTAAAT	PC-3p-22	21	3'	44	29	34	36	chrC07	+	42998329	42998519	aatttaactttaaccagacgacttaatataaagtcgtccctccagaagactTAATTTAAAGTCGTCCGGGGAAAGcaaagtcgtccagaatttttcccaattttctggtcaaaccttgcTTATCCCGGACGACCTTAAATtaagtcgtttagctggacgactttcatctaagtcgtctggagaaagttaaa	..(((((((((..((((((((((((....((((((((((........((((((((((((.((((((((((..((((((.((...((((((..((....))..))))))....)).))))))..)))))))))).))))))))))))........))))))))))....))))))))))))..)))))))))	39.3	-96.1	1.3
CGCTAAGAACTCCATCATAAGAAT	PC-3p-23	24	3'	34	16	26	20	chrC07	-	39597259	39597424	tgtttaatGGGGGTTTTTAGGATGAAGTTCTTagcggaatataagaatccgtcttttaacttttaactaaaaaaactaagaaccggttctcaaatatctaagagacaggttcttatattcCGCTAAGAACTCCATCATAAGAATccccgttaaacatgctctaatg	(((((((((((((((((((.((((.((((((((((((((((((((((((.((((((((..((((......))))....((((....))))........)))))))).)))))))))))))))))))))))).)))).)))))))))))))))))))..........	34.3	-78.9	1.4
ATATTCCCCTAAAAACTCCACCCT	PC-3p-24	24	3'	12	17	9	21	chrC04	-	7070548	7070709	atcagaacatgattatcggggttcttAGGATGGGGTTCTTAGCGGAATATaagaacccgtctcttaacttttaactaaaaaaactaagaacctgttcttaaataattcttATATTCCCCTAAAAACTCCGCCCTaataaactctggataataatgctctagt	...(((.(((.((((((((((((.(((((..((((((.((((.((((((((((((...((......))................((((((....)))))).....)))))))))))).)))).))))))..)))))..))))))).))))).))).)))...	34.6	-49.8	0.9
ATTAAGGACCTAAGCACAAGGACT	PC-3p-25	24	3'	16	14	12	17	chrA09	+	24501617	24501795	aggacctgtcttgtaagggcatcattattgcaagtccttgtgcttaggtccttaatacatatatatgtatatgtatatattatatatgcgtatataatatatacatatacatatatatgtATTAAGGACCTAAGCACAAGGACTtgcaataatgatgcccttacaagacaggtccttct	((((((((((((((((((((((((((((((((((((((((((((((((((((((((((((((((((((((((((((((((((((((....))))))))))))))))))))))))))))))))))))))))))))))))))))))))))))))))))))))))))))))))))))))...	32.4	-148	2.6
								chrC03_random	+	1092300	1092448	gaacatcattattgcaagtctttgtgtttttgggtccttaatacacatatatgtatatgtatatattatatacgtatatataatatatacatatacatatatatatatATTAAGGACCTAAGCACAAGGACTtgcaataatgatgccct	...((((((((((((((((((((((((..((((((((((((((...((((((((((((((((((((((((((....)))))))))))))))))))))))))).....))))))))))))))))))))))))))))))))))))))....	26.2	-84.1	2.2
GTCTTAGAACTCCGGGTTAATCA	PC-3p-26	23	3'	13	10	10	12	chrC02	-	6799854	6800047	ttagaacatgattaacctgaggtttttaagatgaggtttttagcgaaagttaaaaaaaattaaaaaagttaaagaaccaattcttaagaaaaatgttcttaatttctaataagaatcctaCTCTTAGAACTCCGGGTTAATCAtggtcttatagttcattatattgtctcttaatggtagaagttaattagact	..(((.(((((((((((((..(((((.((((..(((((((((((....)))))))).........(((((((.((((...(((....)))....)))))))))))...........)))..)))))))))..))))))))))))).)))................((((.(((((.......)))))..)))).	26.8	-49.8	1
AAGGACCCCCAATAATCATGCCCT	PC-3p-27	24	3'	7	9	5	11	chrC03	+	18301145	18301290	gggcatgattactgggttctttactcttggatcattaatacacatatatttgtatatatatattatatatacgtatataatatatacatataaatatatgtgtattaagaatctaagaacAAGGACCCCCAATAATCATGCCCTaa	(((((((((((.((((.(((((..((((((((..(((((((((((((((((((((.(((((((((((((....))))))))))))).)))))))))))))))))))))..))))))))..)))))..)))).)))))))))))...	26.7	-74.6	1.9
AATTCCGTTGGAAAATCCTGACA	PC-3p-28	23	3'	18	1	14	1	chrC04	+	45155048	45155224	tcgggatcgtatgaccaaataccgacgagtgtattctgtcaggattttccgacgcagtttcgacgaatttgccgaaatatatttccgacaagttttcgttggAATTCCGTTGGAAAATCCTGACAgatttttttcggtcggtttttccgtcggtattgtccgtgttttcttgtagta	...((((..((((((.(((.(((((((((.....((((((((((((((((((((.((((((((((((((((.((.((.....)).)).)))))..))))))))))).)))))))))))))))))))).....)))).))))).)))..)))).))..))))................	42.4	-72	1
ATATTCTGCTAAGAACTCTACCCT	PC-3p-29	24	3'	13	2	10	2	chrA04	-	15752036	15752206	acttgattacttagagcatgattaatgaagggtcttatagtaaagttcttagcagaatataaactggttcttaactttttttagttaaaagttaaaagacggtttcttATATTCTGCTAAGAACTCTACTCTaaaaaccttcattaatcttgctcttacaggttatcataa	...((((.((((((((((.((((((((((((...(((.((((.(((((((((((((((((((((((....(((((((((.......)))))))))....))))...))))))))))))))))))).)))).)))...)))))))))))).))))))...)))).))))...	28.7	-72.3	1.5
AGGGTGAGGTCGGGGGTTCGAATC	PC-3p-30	24	3'	24	19	18	23	chrC07	+	38379374	38379615	aacccgccccgtgggacccaggctgacagcgctgcagcgcaccgaccccaacccctccattatgggaactacctgccccataattaggttgttggtgaGATTCGAACCCCCGACCTCACCCTttaacagccttcccacaagacaagctgtcaccaattgatctgcagatcaattggtgacagcttgtcttgtgggaaggctgttaaAGGGTGAGGTCGGGGGTTCGAATCtcaccaacaacc	..........(((((...((((......((((....))))............(((........))).....)))).))))).....((((((((((((((((((((((((((((((((((((((((((((((((((((((((((((((((((((((((((((....))))))))))))))))))))))))))))))))))))))))))))))))))))))))))))))))))))))))))))	55.4	-182	1.4
ATTCCGTTAAGAACTCCACCTTA	PC-3p-31	23	3'	64	60	49	74	chrC02	+	22116860	22117011	ttgggaggcttttAGGACGGGGTTCTTAGCGGAATATaagaacccgtctcttaaaacttttatttaaaagcaggttcttaacttttttagttaaaagttaagaatcaagttcttatATTCCGTTAAGAACTCCACCTTAagaatcctccaat	...(((((.(((((((..(((((((((((((((((((((((((.............(((((....)))))..((((((((((((((......))))))))))))))..)))))))))))))))))))))))))..)))))))..)))))...	34.2	-70.3	1.4
ATATTCTCCTAAGAATTCTGCCCT	PC-3p-32	24	3'	75	42	58	52	chrC05	-	4016940	4017117	tccacggtttcttagggcggagttctcagggaaatataagaaactgtttcttaattttcaactaaaaaattaagaaattgtttcttaactttttagttgaaaattaagaaacaattttttATATTTTCCTAAGAATTCTGCCCTaagaaaccgtggataatgatgatctaagttcttt	((((((((((((((((((((((((((.((((((((((((((((.((((((((((((((((((((((((.((((((((...)))))))).)))))))))))))))))))))))).)))))))))))))))).)))))))))))))))))))))))))).....................	28.7	-101.5	2
ATATAAGAGCCGTCTGTTAGCTGA	PC-3p-33	24	3'	8	10	6	12	chrC03	-	35069490	35069611	gggttattaggttcgggtaaaatacggttcttacattttcttagattttaaataagaaaagttaagaactgtcttttaaataagagATATAAGAGCCGTCTTTTAGCTGAaaaatgtaaaga	...((((....(((((.(((((.((((((((((..((((((((.........)))))))).........((((((((....)))))))))))))))))).))))).)))))....))))...	28.7	-33.8	1
AGAGAATTTGCCAAAGGACAAACT	PC-3p-34	24	3'	13	7	10	9	chrA02_random	+	839826	839979	tgttcttagtttgtcctttggcaaattctctttgatattgataggtcccttgccaagagatatctattgttgatctagaaacatggatttgataccaattaaggtccctcttcaaatcaaAGAGAATTTGCCAAAGGACAAACTaagaacacac	((((((((((((((((((((((((((((((((((((.((((.(((..(((((...(((....)))..(((..(((((......)))).)..))).....)))))..)))..))))))))))))))))))))))))))))))))))))))))...	35.7	-76.5	1.4
GTTGACTCTGAGAATACCCGGAAA	PC-3p-35	24	3'	81	22	63	27	chrA05	-	14480835	14481097	agaatacattgatcttaggtatttttagactaaataagatctctgtgattatcttagttttccGGGTATTCTCAGAATCAACGGATTtccggaagccttataaaacagaactagaaatccGTTGATTCTGAGAATACCCGGAAAactaagataatcacagagatcttatttagtctaaaaatacctaagatcaatgtattcttaaattcgttgagatcaccaatgatctaccgaaaacaaagaataaagagagaactctcaat	(((((((((((((((((((((((((((((((((((((((((((((((((((((((((((((((((((((((((((((((((((((((((..(..................)..)))))))))))))))))))))))))))))))))))))))))))))))))))))))))))))))))))))))))))))))))))))))))....((((...((((((....))))))..)))).............((((....))))...	32.3	-162.7	1.9
TGAAATACATGCAGATCTCCCGCT	PC-3p-36	24	3'	17	9	13	11	chrA04	+	12237070	12237160	ttagcgggtgagatttgcatgcagatctcccgtttttttccacaaaaatacaaaaatatTGAAATGCATGCAGATCTCCCGCTtaaactgc	..((((((..(((((((((((((..((....((((((..............))))))...))..)))))))))))))))))))........	39.6	-31.4	0.9
ACACTTTTCGGCTAAGAGACGACT	PC-3p-37	24	3'	56	29	43	36	chrC03	+	58827623	58827811	ctaagaaaaactaataaccgtctcttaaataagagatataagagccgtctcttacccgaaaagtgtaaaaaaaacaaaaaaatattaaatcatgagttaaattttttttttgttttttttACACTTTTCGGCTAAGAGACGACTcttatatctcgtatttaagagatggttcttagcttttcttagtta	(((((((((.((((.((((((((((((((((.((((((((((((.(((((((((.(((((((((((((((((((((((((((.(((.(((.....))).)))..))))))))))))))))))))))))))).))))))))).)))))))))))).)))))))))))))))).)))).)))))))))...	27.5	-101.8	2
ACGAAGCATAGAACAGATCTTTCT	PC-3p-38	24	3'	13	11	10	14	chrC08	-	24518997	24519094	aacagagaaagattttttttatgcttctgtgaagtaccttagttagtataatcttaactaagttaattcACGAAGCATAGAACAGATCTTTCTctact	...((((((((((((.(((((((((((.(((((.((.(((((((((.......))))))))).)).)))))))))))))))).))))))))))))...	29.6	-43.5	1.5
CGGGCCCCTTAGGATACTACTGA	PC-3p-39	23	3'	36	44	27	54	chrC05	+	31782548	31782764	ctatcaatgacaaaaaaggatgtcaatttctcgtcttaaagaaaagaaatgcattagatgcagtagtatcctagggggcccgctagtatggtagaaagagatctctttctaccatactagCGGGCCCCTTAGGATACTACTGAatctaatgcattcctttcatttaagacgagaaattgacatccttttttgtcattgatagtcaaattgtattcaa	((((((((((((((((((((((((((((((((((((((((..((((.((((((((((((.(((((((((((((((((((((((((((((((((((((((....))))))))))))))))))))))))))))))))))))))).)))))))))))).))))..))))))))))))))))))))))))))))))))))))))))...............	36.9	-162.8	2
ACTTTTCGGCTAAGAGACGACTCT	PC-3p-40	24	3'	14	6	11	7	chrC03	+	58827639	58827864	accgtctcttaaataagagatataagagccgtctcttacccgaaaagtgtaaaaaaaacaaaaaaatattaaatcatgagttaaattttttttttgttttttttacACTTTTCGGCTAAGAGACGACTCTtatatctcgtatttaagagatggttcttagcttttcttagttaaaatctaaaaaaaactaagaaccgtctcttaaccgaagctaagaaccccagtt	...((((((((((((.((((((((((((.(((((((((.(((((((((((((((((((((((((((.(((.(((.....))).)))..))))))))))))))))))))))))))).))))))))).)))))))))))).))))))))))))(((((((((((((((((((((.............))))))))..............)))))))))))))......	30.1	-103.2	1.5
AGACTACTAGATTTTGACCCGTGC	PC-3p-41	24	3'	16	2	12	2	chrA02	-	15030806	15030968	aaaaaaaacccgcgctttcaaagcgcgggtcaaaatctagtaattagcttaaaaaggaatgaaaatatgtaagaaattacttaaaattaggcaagtattattttgtacttatgctgtaatAGAATACTAGATTTTGACCCGTGCaaccgcacgggtgtttatt	...(((.(((((.((.......((((((((((((((((((((..........................((((....)))).....(((((((((((((......)))))..)))).))))....))))))))))))))))))))....)).))))).)))...	33.1	-55.3	1
GCGGACCTAGACTCACAGCCCTGC	PC-3p-42	24	3'	1	9	1	11	chrC02	-	30637590	30637781	tggagtcagtaaggactcacatgcgaggggttacggttggtgccttGCAGAGCTGTGAGCCTGGGTCTgcgggacaggttgtcacaaaaaaagtcgaatttttatgtaacaacctgtcccGCGGACCTAGGCTCACAGCCCTGCagggtaccgaccctaacccttcacatatgagttttcattgactccccc	.(((((((((.(..(((((.(((.(((((((((.((((((((((((((((.(((((((((((((((((((((((((((((((.(((.(((((......))))).))).))))))))))))))))))))))))))))))).)))))))))))))))).))))))))).))).)))))..).)))))))))...	53.1	-147.2	1.4
TGTATTTCCTCGGAATTGCCT	PC-3p-43	21	3'	16	3	12	4	chrA07	+	14229479	14229686	gaaaatgaattcctcggaatataccgaggcatttccgaggcaattccgaggaaatacaaaattttgcttcctcggaattccgtcggaatattccgacggaattccgaggaagcaaaatttTGTATTTCCTCGGAATTGCCTcggaaatgcctcggtatattccgaggaattcattttccgtcggatcgtccgtcagaataccgctgtt	(((((((((((((((((((((((((((((((((((((((((((((((((((((((((((((((((((((((((((((((((((((((....)))))))))))))))))))))))))))))))))))))))))))))))))))))))))))))))))))))))))))))))))))))))...(((.....))).(((.......)))..	44.7	-168.4	1.8
AAAAACGACGTCGTCTTATCTTGT	PC-3p-44	24	3'	17	3	13	4	chrAnn_random	+	6195158	6195364	attgactctaacagaagttagtcaaccgttaacaagataaaacgacgtcgtttgatatacgaggaaaagttgtccaatttcgaccccaacactctgaatcgtgccaaataagacccgaacAAAAACGACGTCGTTTTATCTTGTtaacggttgactaacttctgttagagtcaatgtagatttaggcacgttttaagaagttcgggt	(((((((((((((((((((((((((((((((((((((((((((((((((((((......((.((....((((........)))).....(((........)))..........)))).....)))))))))))))))))))))))))))))))))))))))))))))))))))))................................	39.1	-96.2	1.2
AGAGTGAGATATAAAGTTGGGTT	PC-3p-45	23	3'	24	2	19	2	chrC01_random	+	399782	399948	gttgttctaatctaactttatatttcactccataatagaataatgaacaaacaaaaaatagattactccattatAGAGTGAGATATAAAGTTGGGTTaaaacagttcttattccatactccatttcattacattttagagcaaaaaatggaatagagttggagaacc	..((((.(((((((((((((((((((((((.(((((.((.((((.................)))).)).))))).))))))))))))))))))))))).))))((((....((((.((((.((((((((................)))))))).)))))))))))).	28.1	-51.2	1.1
ACTTCACCCTAAGAACTCTCCAT	PC-3p-46	23	3'	8	8	6	10	chrA07	+	9524118	9524251	gcttaatgggggtttttagagtgggttttttagcttattgaagaaccggttcttactttttttagttaaaagttaacagacggattcttatattccaataaaaACTTCACCCTAAGAACTCTCCATtagacatg	..(((((((((((((((((.((((((((((..........((((((((......((((((.......)))))).......))).)))))..........)))))).)))).)))))))))).))))))).....	33.6	-39	0.9
AAAGATTGTTGTGGTCTTGTGCCT	PC-3p-47	24	3'	198	136	153	169	chrC05	+	3330482	3330721	aataggcacaagaccacaacaatcttttcgtcttcctcgtagattttctgagcagtgaggaagagaccacaacaatcttttcgtcttcctcgtagattttctgagcagtgaggaagacgaAAAGATTGTTGTGGTCTTGTGCTTatttacacttcttttagtatctttcgtttgatcagatttgatggtggattctctgtttccgagcatcgaaacaaccgttgacgacgcctctctaga	(((((((((((((((((((((((((((((((((((((((........(((..((((((((((((((..............)).)))))))))........)))..)))))))))))))))))))))))))))))))))))))))))).........(((((......(((((........(((((((.((((.........))))..))))))).........))))).......)))))	41.7	-96.5	1
AATTTCTGCTAAGAACTTCACTCT	PC-3p-48	24	3'	13	4	10	5	chrCnn_random	+	63358034	63358189	ttgtctaatatatttggtaataagagcatgattaacccgaggttattAGGATGAGGTTCTTATCGGAAGTTaacaaacagtttcttAATTTCTGCTAAGAACTTCACTCTaaaaatcccgggttaatcatggtctaattatttaatttttggagta	...(((((...(((..(((((.(((.(((((((((((((.((((.((((..(((((((((((.((((((((((.(((...))).)))))))))).)))))))))))..)))).)))).))))))))))))).))).)))))..)))..)))))...	31.4	-65.8	1.3
TAGAACTCCGCATTTACATACGCA	PC-3p-49	24	3'	16	8	12	9	chrA01	-	10461653	10461852	tttcttgcttttaggttcttaaaatacatgtatgtgtatgtatataatatatatgcgtatgtaattgcgggattctaagctttacggtaagaaactttcggttgggtttcccgtaaagctTAGAACTCCGCAATTACATACGCAtatataatatatacatacacatacatgtattttaagaacctaagagcaagaaaccc	((((((((((((((((((((((((((((((((((((((((((((((.(((((((((((((((((((((((..(((((((((((((((...((((((........)))))))))))))))))))))..))))))))))))))))))))))).))))))))))))))))))))))))))))))))))))))))))))))...	32.5	-137.8	2.1
								chrA09_random	-	3066193	3066351	atatattatatatgtgtatgtaactgcgggttctaaattttacgggtctaaattttacggaaaacgtaaccaaaaatattaccataactatttattttgggttacgattcctgtaaagttTAGAACTCCGCATTTACATACGCAtatataatatatacg	(((((((((((((((((((((((.(((((((((((((((((((((((((.........)))...(((((((.((((((..............)))))).)))))))...))))))))))))))))).))))).)))))))))))))))))))))))...	28.9	-70.9	1.5
AACTTCTGCTAAGAACCATATCCT	PC-3p-50	24	3'	21	12	16	15	chrC06	+	17238572	17238723	ccgcttaagaccatgattaacccggaattcttAGAGTGGGATTCTTAGCGGAAGTTaagaaactgtttcttAACTTCTGCTAAGAACCATATCCTaagaactcgggttaatcatgctctaagatctctcgactgactgagccatttattaaa	...(((.(((.((((((((((((((..(((((((..((((.(((((((((((((((((((((...))))))))))))))))))))))).))..))))))).)))))))))))))).))))))....((((......))))............	39.5	-66.2	1.1
TTTGTTCACAATTGCATAGTC	PC-3p-51	21	3'	9	13	7	16	chrA02_random	-	1408164	1408298	ctgcaaaatctactgcaaaatagagtgaattatgcagttgtgaataaacataaaaacattactgcatatatagtaatgaattttttgTTTGTTCACAATTGCATAGTCcactccattttacagtggagttggaaa	...(((..(((((((.(((((.(((((.((((((((((((((((((((((.((((.((((((((......))))))))..)))).)))))))))))))))))))))).))))).))))).))))))).)))....	30.4	-58.9	1.4
ATATTCCGCTAAGAACTTCACTCT	PC-3p-52	24	3'	43	28	33	35	chrCnn_random	+	74060567	74060721	aactaatggggagttcttaaagtgaggtttttagcggaatataataaaccgtctcttaatttttaagagcccgttcttagcttttttggttaaaagttaagagacggtttcttATATTCCGCTAAGAACTTCACTCTaagaaccatccattaatc	...(((((((..(((((((.((((((((((((((((((((((((.(((((((((((((((((((((((((.........))))......))))))))))))))))))))).)))))))))))))))))))))))).)))))))..)))))))...	34.2	-82.2	1.5
ATCCATTAGTATCAGACGATC	PC-3p-53	21	3'	202	133	156	164	chrCnn_random	+	33329005	33329132	tcagAGATCGTCTGATACTAATGGGtcattttttgtaattggtaaatcttaactaaacattttacacgcttgagagactctttctcttgcaaaaaatgATCCATTAGTATCAGACGATCtcaaagacg	...((((((((((((((((((((((((((((((((((.(((((........)))))...............((((((...)))))).)))))))))))))))))))))))))))))))))).......	34.4	-60.6	1.4
								chrCnn_random	-	33328906	33329042	accgtctttgagATCGTCTGATACTAATGGATCattttttgcaagagaaagagtctctcaagcgtgtaaaatgtttagttaagatttaccaattacaaaaaatgACCCATTAGTATCAGACGATCtctgaagatgtt	..((((((((((((((((((((((((((((.((((((((((..(((((.....))))).((((((.....))))))...................)))))))))).))))))))))))))))))))).)))))))..	34.3	-61.8	1.3
GAGATATGAAATTGGATTGGAGCA	PC-3p-54	24	3'	34	3	26	4	chrA09	-	23949423	23949594	agtaaaagtgaaaatagaataaaatggttctaaccctatttcattttctactttataatggaatgatgaacaaacaaaaaatagattactccatttatggagtaaattttattatagagtGAGATATGAAATTGGGTTGGAGCAttctttactttatattcacttttattcc	((((((((((((.(((((.((((...((((((((((.(((((((((((.((((((((((..(((..((......)).........((((((((....)))))))))))..)))))))))))))).))))))).))))))))))....)))).))))).))))))))))))..	25.6	-60.4	1.4
AAGGGCTTCCAACTTAAAACCAAT	PC-3p-55	24	3'	37	26	29	32	chrC02	+	43025023	43025115	ctcttgggtttaagttggaagcccttaatagattcatgtttattAAGGGCTTCCAACTTAAAACCAATtggtgattagtgtattgaccgtaac	...((((.(((((((((((((((((((((((((....))))))))))))))))))))))))).))))..((((((......))).))).....	36.6	-43.8	1.3
AAGGACCTCTTGCGATAATCATGG	PC-3p-56	24	3'	72	12	56	15	chrC07	+	44251316	44251443	gttgttgcggacatcatagggcctacatatgttttaactcctaTACCATGATTATCGCAAGAGGTCCataagtttttttcaaaaaaaaaaaaaaaaaacttAAGGACCTCTTGCGATAGTCATGGaaa	(((......)))...((((((.................)))))).((((((((((((((((((((((.(((((((((((............))))))))))).))))))))))))))))))))))...	34.4	-54.8	1.2
ATAAGAACTGTCTCTTAACCGAAA	PC-3p-57	24	3'	29	6	22	7	chrA04	-	8996651	8996791	atatgatcttaagacaatgattaactggagtttttatcTTCGACTAAGAGACGGTTCTTACCtttttttagattttaactaagaaaagctaagaatcatttttaaataagaaatATAAGAACTGTCTCTTAACCGAAAagt	...(((((..........)))))...............((((..((((((((((((((((.((((((((((.......)))))))))).........((((((.....)))))).))))))))))))))))..))))....	27	-34.8	0.9
AGAGTCGGGGTCTTATATTCTGCT	PC-3p-58	24	3'	24	9	18	11	chrC08	-	37739687	37739862	atcattaacggggttcttagaacggggctcttAGCGGAATATAAGAACTCGGCTCTtaatttttcactgaaatgctaagagtcggctcttaaataagagatttaagagccgactcttaacttttccagttaaaagttaAGAGTCGGGTTCTTATATTCTGCTaagaaccatgtact	............((((...))))..((.((((((((((((((((((((((((((((((((((((.(((((((...(((((((((((((((((((.....)))))))))))))))))))...))).)))).)))))))))))))))))))))))))))))))))))).)).......	38.1	-93.7	1.4
ATTAAGGACCCAAGAGTAAGGACC	PC-3p-59	24	3'	19	7	15	8	chrC09	+	35700076	35700244	gttcatgattatTGGGGGTCTTTGCTCTTGGGTCCTtaatacacatatatttgtatgtatatattatatacgcgtatataatatatacatataaatatatgtgtATTAAGGACCCAAGAGTAAGGACCcccaataatcatgcctttaggctcttgctaagctcaagacc	...(((((((((((((((((((((((((((((((((((((((((((((((((((((((((((((((((((....)))))))))))))))))))))))))))))))))))))))))))))))))))))))))))))))))))......((.(((((.......)))))))	34.3	-111.7	1.9
AGCGAGATATGAAGTTAGGTTGGA	PC-3p-60	24	3'	32	5	24	6	chrA09	-	13030737	13030916	tactccaatcctatttcatttcccactctataatggattgatgaacaaaaaaaaaagattacttcatttatggagtaaatttcattatggAGTGAGATATGAAGTTAGGTTGGAacattcattactccatattcactttaactccattttaaaggaaaaaatgaagtacggatggagatg	...(((((((..(((((((.((.(((((((((((((((((.....)))..........((((((((....))))))))..)))))))))))))).)).)))))))..)))))))..........((((((....((((((..(((........))).....))))))....))))))...	30.6	-55.1	1
GGTTTCCCGTAAAGCTTAGAACT	PC-3p-61	23	3'	18	13	14	16	chrC04	-	46009562	46009777	cttaaaatacatgtatatgtatgtatatattatatagacgtatgtaattacggggttctaagctttacgggaaatccaaccgaaagttttttagtttcttaaataagaaattttcggttgGGTTTCCCGTAAAGCTTAGAACTctgcaattacatacgtttatataatatatacatacatatacatatattttaagaatctaggagtaagaaactt	(((((((((.(((((((((((((((((((((((((((((((((((((((.(((((((((((((((((((((((((((((((((((((((((((..........))))))))))))))))))))))))))))))))))))))))))).))))))))))))))))))))))))))))))))))))))).))))))))).......((((.....))))	27.8	-129.9	2.2
AAAAATAGAGTGCCTTTGGAGATG	PC-3p-62	24	3'	18	2	14	2	chrA02	+	14383002	14383187	ttagaccatctccaatggtactctataattttctctatatttcacttcaaaatagagtaactatattatagagttggatgttactctattttaatgtaaattatagaggaAAAAATAGAGTGCCTTTGGAGATGctcttagaattgattttttcacaaccttaggattgattcaatgcttggttat	..(((.(((((((((.((((((((((..(((((((((((.((.((...(((((((((((((..................)))))))))))))...)).)).)))))))))))..)))))))))).))))))))).)))..(((........)))..((((..((.((((...)))).)).))))..	29	-66.9	1.2
CTTTCCCCGGACGACTTTAAA	PC-3p-63	21	3'	5	8	4	10	chrAnn_random	+	23171726	23171960	cgtcctaggttagttttgtaattgaaaaataaaacttgaaatttaactttctccagacgacttagatgaaagtcgtccagctaaacgacttAATTTAAGGTCGTCCGGGATAAGCaaggtttgaccagaaaattgggaaaaattctggacgactttgCTTTCCCCGGACGACTTTAAAttaagtcttctggagggacgactttatattaagtcgtctggttaaagttaaattatg	...........((((((((.........))))))))...(((((((((((..(((((((((((((...((((((((((..(((...(((((((((((((((((((((((..((((((((((...((((((..((....))..))))))..))))))))))..)))))))))))))))))))))))...)))..))))))))))...)))))))))))))..)))))))))))...	37	-114.7	1.3
ATATTCTGCTAAGAACTTCACCCT	PC-3p-64	24	3'	46	15	36	18	chrC02	+	44721917	44722107	ttagggtggagttcttaacggaatataagaaaccgtctcttagtttttaactaaaaaagttaagaaccggctcttaatggttcttaaattttttagttaaaaactaagagaagatttcttATATTCTGCTAAGAACTTCACCCTaataacctcaattaatcatgctccgaaaactccagttaaaggactga	(((((((((((((((((.((((((((((((((...(((((((((((((((((((((((.((((((((((........)))))))))).)))))))))))))))))))))))...)))))))))))))).)))))))))))))))))..............................(((((....))))).	31.9	-90	1.5
AAGAATTCTGTCCTAAGAAAACCT	PC-3p-65	24	3'	16	1	12	1	chrC01	+	27920572	27920749	tcgtgtaacagtggttttggtggttccctaagagcatcattatccaggatttcttaggacggagtttttaaaaattaagaaacattttcttatattcccctAAGAACTCTGTCCTAAGAAAACCTggataatgatgctctaagcgtcgaaatcaggttccatttgtaaatgttggttc	..(((.(((..((((((((..(.((.....((((((((((((((((((.(((((((((((((((((((((.....(((((((...)))))))........))))))))))))))))))))).)))))))))))))))))))).)..)))))))).))).)))................	37.1	-78	1.2
ATATTCTGTTAAGAACCCCACCCT	PC-3p-66	24	3'	39	20	30	25	chrA09	-	31934758	31934900	ggttttttaaggtgggattcttagcggaatataagaactcgtatttaagagccgattcttaacctttttagttaaaagttaagaaacatgttcttATATTCTGTTAAGAACCCCACCTTaaaagcatgagcatcagtgaaccc	((((((((((((((((.(((((((((((((((((((((..((........))...((((((((.((((.....))))))))))))....))))))))))))))))))))).))))))))))).((....))......))))).	35	-57.2	1.1
GCTTATCCCGGACGACCTTAAATT	PC-3p-67	24	3'	23	11	18	14	chrC06	+	5349300	5349526	aactttaaccagacgacttaatataaagtcgtctctccagaagactTAATTTAAAGTCGTCCGGGGAaagcaaagtcgtccagaatttttcccaattttctggtcaaaccttGCTTATCCCGGACGACCTTAAATTaagtcgtttagctggacgactttcatctaagtcgtctggagaaagttaaatttcaagttttatttttcaattacaaaactaacctaggacg	((((((..((((((((((((....((((((((((........((((((((((((.((((((((((..((((((.((...((((((..((....))..))))))....)).))))))..)))))))))).))))))))))))........))))))))))....))))))))))))..))))))........((((((.............))))))...........	37.4	-92.5	1.1
								chrC06	+	30759306	30759550	ataatttaactttaaccagacgacttaatataaagtcgtctctccagaagactTAATTTAAAGTCGTCCGGGGAaagcaaagtcgtccagaatttttcccaattttctggtcaaaccttGCTTATCCCGGACGACCTTAAATTaagtcgtttagctggacgactttcatctaagtcgtctggagaaagttaaatttcaagttttatttttcaattacaaaactaacctaggacgacttacacgta	..(((((((((((..((((((((((((....((((((((((........((((((((((((.((((((((((..((((((.((...((((((..((....))..))))))....)).))))))..)))))))))).))))))))))))........))))))))))....))))))))))))..)))))))))))...((((((.............))))))........(((.......))).	36.3	-97.8	1.1
TGACGCGTAGCGCCTAGGCGGCC	PC-3p-68	23	3'	15	11	12	14	chrC09	+	44324363	44324523	cggccgcctaggcggctaggcggtcatttaggcggctaggcggtcatttaggcggtctaggcggaaaaaatcgaatatccgatttttttaaccgatttggcataaatcggggcggaatagTGACGCGTAGCGCCTAGGCGGCCgatttttagaacagggga	((((((((((((((.(((.(((.(((((....((.((((((.(((.....))).)))))).))((((((((((......))))))))))..((((((((...))))))))........)))))))).))))))))))))))))).................	54	-77.8	0.9
GGAGTGAGATATGAAGTTGGGTTT	PC-3p-69	24	3'	28	0	22	0	chrA07	-	12163574	12163693	acaatccaactctatatcttatttcataatggagtaatgaacaaaaaatatattactctaattatggagtaaactccattatGGAGTGAGATATGAAGTTGGGTTTgagcatttcttact	..(((((((((..((((((((((((((((((((((.................((((((((....))))))))))))))))))))))))))))))..)))))))))...............	29.2	-47.6	1.4
								chrC02	-	742120	742336	agtaaaagtgaaaattgagtaaaattgctcaAATCCTACTTCATTTTCCACTCTAtaatggagtgatgaacaaacaaaaaatagattactctattctatttatggagtaaattttattatGGAGTGAGATATGAAGTTGGGTTTgaacattccttactccatattcatttttactctccattttagaagaaaaaatggagtaaggatggaaatgccc	((((((((((((.((.((((((...((.((((((((.(((((((.(..(((((((((((..(((..((......)).........(((((((((.......))))))))))))..)))))))))))..).))))))).)))))))).))....)))))).)).))))))))))))(((((((((.......)))))))))...((((....)).)).	30	-73.3	1.1
GAGATATGGAGTTGGGTTTGAGC	PC-3p-70	23	3'	22	0	17	0	chrA03	+	16096409	16096634	agtaaaagtgcaaatgaagtaaaattgctccaaccctactccatttcccactccataatggagtgatgaacaaacaaaaaatagattactctatttatggagtaaatttcattatggagtGAGATATGGAGTTGGGTTTGAGCgttccttactccatattcacttttactccattttagaggaaaaaatagagtggggatggagatgcccttattttaatccaatg	((((((((((...(((.(((((...(((((.(((((.(((((((.((.((((((((((((((((..((......)).........((((((((....)))))))))))))))))))))))).)).))))))).))))).)))))....))))).)))...))))))))))((((((((..........))))))))((((..(((((....)))))..))))....	35.4	-84.6	1.1
AACTTCCACTAAGAACCCTACTCT	PC-3p-71	24	3'	10	13	7	16	chrC08	-	34560184	34560303	atcttagagcatcattaacccggagttctaaGATGAGGTTCTTAGCGGAAGTTAagaaacagtttcttAACTTCCGCTAAGAACCCTACTCTaagaaccccgagttaatcatggtcttat	.....(((.(((.((((((.(((.(((((.((((..(((((((((((((((((((((((...)))))))))))))))))))))))..).))).))))).))).)))))).))).)))...	40	-60.9	1.3
AGAGTCGGGTTCTTATATTCTGCT	PC-3p-72	24	3'	372	106	288	131	chrC04_random	+	3988275	3988536	ggacggagttcttagcggaatataagaacccgatttttaatttttaactgaaaatgctaagagtcggctcttaaataagagatttaagagccgactcttaactttttcagttaaaagttaAGAGTCGGGTTCTTATATTCTGCTaagaaccatgtactaagaaacctgcgttaatgatggtctaacactcatgcatatgtattttcttgtcacatatatattttttcttctttaaacaaaagacagtgaatttgtgtatgcc	..(((..(((((((((((((((((((((((((((((((((((((((((((((((...(((((((((((((((((((.....)))))))))))))))))))...)))))))))))))))))))))))))))))))))))))))))))))))..)))..(((((((..(((((..((((((......)).))))....))))).)))))))...((((((((..((..(((((((.....))))).))..))..))))))))..	33.2	-123.7	1.4
TGACAGCTTGTCCTGTGGGAATGC	PC-3p-73	24	3'	17	25	13	31	chrAnn_random	+	1560012	1560257	cattatgagttctctctaactccataattagattgttggtgggcctcgaacacaggacctcactctttaacAGCATTCCCACAGGACAAGTTGTCaccaactgatctgcagttcaattggTGACAGCTTGTCCTGTGGGAATGCtgttaaaaggtgaggttctgggttcgaggctcaccaacaatctaattatagagttagagagaactcataatggagaggttggggtcggtgcgctgcagcgct	((((((((((((((((((((((.((((((((((((((((((((((((((((.(((((((((((..(((((((((((((((((((((((((((((((((((.(((........))).)))))))))))))))))))))))))))))))))))..))))))))))).)))))))))))))))))))))))))))).)))))))))))))))))))))).................((((....)))).	46.7	-184.8	1.6
								chrAnn_random	+	1559450	1559713	cattatgagttctctctaactccataattagattgttggtgggcctcgaacacaggacctcactctttaacAGCATTCCCACAGGACAAGTTGTCaccaactgatctgcagttcaattggTGACAGCTTGTCCTGTGGGAATGCtgttaaaaggtgaggttctgggttcgaggctcaccaacaatctaattatagagttagagagaactcataatggagaggttggggtcggggggctgcagcgctgtgagcctgggccccacg	((((((((((((((((((((((.((((((((((((((((((((((((((((.(((((((((((..(((((((((((((((((((((((((((((((((((.(((........))).)))))))))))))))))))))))))))))))))))..))))))))))).)))))))))))))))))))))))))))).)))))))))))))))))))))).......(((((((...((((((((....))).))))).)))))))..	49.2	-199.4	1.5
AGAGACGGATTCTTATATTCTGCT	PC-3p-74	24	3'	27	14	21	17	chrC05	+	27023716	27023917	gaactaagaacatgattattgggggttcttagagtggagttcttagcggaatataagaacccgtctcttaaaattcttatttaagaaccagttcttagcttttttagttaaaagttaAGAGACGGATTCTTATATTCTGCTaagaaccccaccttaagaacccccaataatcatgctctaagagcatcattatcccaaagac	...((.(((.(((((((((((((((((((((..((((.(((((((((((((((((((((.((((((((((...........((((((....))))))((((((......)))))))))))))))).))))))))))))))))))))).))))..))))))))))))))))))))).))).))....................	36.1	-102.1	1.4
ATATTCTTCTAAGAACTCCGTCCT	PC-3p-75	24	3'	46	28	35	34	chrA07	-	19391305	19391497	ttttaagttgtgaattctattagagcatcaatatccacagttcttagaacggagtttttaggagaatattaaaaaattattttttcaactttttagttaaaaattaagaaacaatttcttATATTCTTCTAAGAACTCCGTCCTatgaaaccgtggataatgatgctcttagtttctagtcatcttaaaatat	(((((((..((((.....((((((((((((.(((((((..(((.(((.(((((((((((((((((((((.((.(((((.((((((.((.((((.....)))).)))))))).))))).))))))))))))))))))))))).))).)))...))))))).))))))))).)))......)))))))))))...	26.4	-68.9	1.4
GATGACGGTATTTCTCCTACGTAG	PC-3p-76	24	3'	8	18	6	22	chrA03	-	4029920	4030033	aactgcacatatagatttgcttcgcaggagagatagcgccatcacattttctaagagtttagctgatggtGATGACGGTATCTCTCCTACGTAGctatccttatatgtgcatct	...(((((((((((((..(((.((.((((((((((.((.(((((((((..((((....))))..))).)))))).)).)))))))))).)).))).)))..))))))))))...	42.1	-51.1	1.1
ATATTCTGATAAAAAACTCCACCT	PC-3p-77	24	3'	14	14	11	17	chrC01	+	36870246	36870408	agtgttcttagggtggattcttagcggaatataaaaacatatctcttattttttaactaaaaaagctaagaaccggttcttagtttttttagttaattaaagttaagagactggattcttATATTCTGATAAAAAACTCCACCTtaagaactctcccattaaa	((.((((((((((((((((.(((.((((((((((.((..(((((((((((((((((((((((((((((((((....))))))))))))))))))))..))))).)))))).))..)).)))))))))).))).))..)))))))))))))).)).........	28.8	-62.3	1.3
AACTTCTGCTAAGAACTTCATCCT	PC-3p-78	24	3'	42	8	33	10	chrC04	+	48879238	48879405	accatgattaacccgatgttcttagagtgaggtttttagcagaagttaaaagttaaaacttttttagttttaagaaccggttcttacctgttttagttaaaagttaagaaacagtttcttAACTTCTGCTAAGAACTTCATCCTaagaactccgggttaatcatgctc	..(((((((((((((..((((((((..((((((((((((((((((((((...((((((((.....)))))))).(((...((((((.((............)).))))))...)))..))))))))))))))))))))))..))))))))..)))))))))))))...	33.3	-76.5	1.4
AGAAGACGGACGAGATGAATACAT	PC-3p-79	24	3'	29	5	22	6	chrA04	-	4126077	4126226	gaggaaacaatcatcacgagtgtATCCATCTTGTTCGTTTTCTACTAtcatattatgttctacattttgatcacatatatagcatcttcttctccataatatgatagtAGAAGACGGACGAGATGAATACATtcaatttgatgtttcaga	...(((((.((((....((((((((.(((((((((((((((((((((((((((((((..........((.............))..........))))))))))))))))))))))))))))))).))))))))....)))))))))...	32.7	-61.7	1.3
GCTTTCCCCGGACGACTTTAAAT	PC-3p-80	23	3'	22	38	17	47	chrC08_random	+	2360672	2360919	cttacgtgtaagtcgtcctaggttagttttgtaattgaaaaataaaacttgaaatttaactttctccagacgacttagatgaaagtcgtccagctaaacgacttAATTTAAGGTCGTCCGGGATAAGCaaggtttgaccagaaaattgggaaaaattctggacgactttGCTTTCCCCGGACGACTTTAAATtaagtcttctggagggacgactttatattaagtcgtctggttaaagttaaattatg	((((....))))............((((((((.........))))))))...(((((((((((..(((((((((((((...((((((((((..(((...(((((((((((((((((((((((..((((((((((...((((((..((....))..))))))..))))))))))..)))))))))))))))))))))))...)))..))))))))))...)))))))))))))..)))))))))))...	37.1	-115.5	1.3
TATATCCCGCTAAGAACCCTACCT	PC-3p-81	24	3'	2	8	2	10	chrAnn_random	-	12759603	12759758	attgggattcttaaagtggattcttagcgaaatataagataccgtctctaaatttttaactaaaaaaagctaaaactaattcttagtttttttaattaaaagttaaaagacgctttctTATATTCCGCTAAGAACCCTACCTtaaaaacgccctcc	...(((....((((.((((.(((((((((.(((((((((...(((((...(((((((((...(((((((((((.........)))))))))))..)))))))))...)))))...))))))))).)))))))))..)))).)))).....)))...	29.5	-49.4	1.1
AACTTTCGCTAAAAACTCTATCCT	PC-3p-82	24	3'	35	15	27	19	chrCnn_random	+	55999176	55999296	tgccactttagactatgattaacccgaggttctcaGAGTGAAGTTCTTAGCGGAAGTtaagaaactgtttcttAACTTTCGCTAAAAACTCCATCCTaataactccgggttaatcatgatt	.............(((((((((((((..(((...((..((.((((.((((((((((((((((((...)))))))))))))))))).)))).))..))...)))..)))))))))))))...	38	-52.3	1.1
AGAGTGAACCATTAGAGCAAATC	PC-3p-83	23	3'	17	0	13	0	chrCnn_random	+	60867699	60867919	tatggagttggatttgctcctatggttcactttataatagagtgaaatataaaataatgttgtttttttactccaaatatagagtaaaaaataacattactctatatttcactctattatAGAGTGAACCATTAGAGCAAATCtaactctagaatatggttattctattttagaatgataaatagaaaaaaaaattatgtaccatcggagatgctcttact	..(((((((((((((((((..((((((((((((((((((((((((((((((...((((((((((((((.((((........))))))))))))))))))...))))))))))))))))))))))))))))))..))))))))))))))))).......(((((((((...)))))))))...........................((((...))))....	26.2	-94	1.6
GTTGAGGGTTTATTTCACTGGATT	PC-3p-84	24	3'	24	4	18	4	chrA03	+	10953717	10953882	taaaaaaaaccctcaactaaAAATCCTGTGAAATAAACCCTCAactttagttccgttaacatatgttaccctccgtctaaaaaaccgtgacggagggtgacatatattaacggtttataaGTTGAGGGTTTATTTCACTGGATTtttagttgagggtttttttcac	..((((((((((((((((((((((((.((((((((((((((((((((.....(((((((.(((((((((((((((((...........))))))))))))))))).))))))).....)))))))))))))))))))).))))))))))))))))))))))))...	34.9	-108.3	1.9
GAGATATGGAGTTGGGTTGAAGCA	PC-3p-85	24	3'	74	8	57	10	chrA06	-	3726811	3726982	agtaaaagtgaaaatagagtaaaattgctccaatcctactccatttctcactccataatggagtgatgaacaaacaaaaaatagattactccatttatggagtaaattttattatacagtGAGATATGGAGTTGGGTTGAAGCAtttcttactctattttcacttttattct	((((((((((((((((((((((((.((((.((((((.(((((((.((((((((((((((((((((((.................))))))))).)))))).((((......))))..))))))).))))))).)))))).)))).)).))))))))))))))))))))))..	30.2	-77	1.5
								chrA06	-	14987463	14987671	tctccaaaatgaagtaaaattgaaaatgaaataaaattgctccaatcccactccataatagagtgataaacaaacaaaaaataaattactccatttatggagtaaatttcattatagagtGAGATATGGAGTTGGGTTGAAGCAttctttactccatattcacttttactctattttagagaaaaaatggagtaaggatagagatgccc	((((.................................((((.((((((.((((((((............................((((((((....)))))))).(((((((....))))))))))))))).)))))).)))).((((((((((((......((((.(((((...))))).))))))))))))))))..)))).....	30.1	-59.2	0.9
AGAGTGAAATATGAAGTTGGGTT	PC-3p-86	23	3'	15	1	12	1	chrA09	-	10719852	10720066	aatggaataaaagtgaatatagaataaaaatgctctaactccactccattttctactttataatggagaaatgaacaaacaagtaatagattacttcatttatgaggtaaattctattatAGAGTGAAATATGAAGTTGGGTTagagcattttttactacatattcacttttagtctattttaaaaaaaaaatagagcggagacggagatgccct	...((..(((((((((((((((...((((((((((((((((.(((.(((((((.((((((((((((((......((......))......((((((((....)))))))).)))))))))))))))))).))).))).))))))))))))))))..)))..)))))))))))).((((((((......)))))))).((....)).......)).	28.4	-72	1.2
TTTATCCAAGGGTTCAGGCTT	PC-3p-87	21	3'	11	10	9	12	chrA01	+	20615687	20615858	aaccctaaatcctaatcactaaaccctaaacccttgggtaaactctgaacccttggataaatcattaactttagtgtttaattttaaatattttttatttagagtttatgaTTTATCCAAGGGTTCAGGCTTtatccacgggtttatgctttagtgattagggtttaggatt	...((((((((((((((((((((...(((((((.((((((((..(((((((((((((((((((((.((((((((((((((....)))))))........))))))).)))))))))))))))))))))..)))))))).)))))))...))))))))))))))))))))...	32	-92.7	1.7
ATATTCCGTTAAGAACTCCACCCT	PC-3p-88	24	3'	278	290	215	360	chrC07	+	20469141	20469298	ttggaggttcttAGGGTAGGGTTCTTAGCGGAAtataagaacccgtctcttaatttttaactaaaaaaattaagaatcggttcttagtttttttagttaaaagttaagagacggattcttATATTCCGTTAAGAACTCCACCCTaaaaactcccatca	.(((..(((.(((((((.(((((((((((((((((((((((.((((((((((((((((((((((((((((((((((....)))))))))))))))))))))))))))))))))).))))))))))))))))))))))).))))))).)))..)))...	33.5	-98.7	1.9
CTTTCCCCGGACGACTTTAAATT	PC-3p-89	23	3'	20	20	15	24	chrC09	+	4787341	4787533	gaaatttaactttctccagacgacttagatgaaagtcgtccagctaaacgacTTAATTTAAGGTCGTCCGGGAtaagcaaggtttgaccagaaaattgggaaaaattctggacgactttgCTTTCCCCGGACGACTTTAAATTaagtcttctggagggacgactttatattaagtcgtctggttaaagttaaa	....(((((((((..(((((((((((((...((((((((((..(((...(((((((((((((((((((((((..((((((((((...((((((..((....))..))))))..))))))))))..)))))))))))))))))))))))...)))..))))))))))...)))))))))))))..)))))))))	39.4	-108.5	1.4
								chrCnn_random	+	9270468	9270715	gaaatttaactttctccagacgacttagatgaaagtcgtccagctaaacgacTTAATTTAAGGTCGTCCGGGATAagcaaggtttgaccagaaaattgggaaaaattctggacgactttgCTTTCCCCGGACGACTTTAAATTaagtcttctggagggacgactttatattaagtcgtctggttaaagttaaattatgaagttttatttttcaattacaaaactaacctaggacgacttacacgtaag	..(((((((((((..(((((((((((((...((((((((((..(((...(((((((((((((((((((((((..((((((((((...((((((..((....))..))))))..))))))))))..)))))))))))))))))))))))...)))..))))))))))...)))))))))))))..))))))))))).(((((.......))))).......................((((....))))	37.1	-113.4	1.2
TGCTTATCCCGGACGACCTTAAAT	PC-3p-90	24	3'	59	34	46	42	chrC07	+	3367737	3367981	ataatttaactttaaccagacgacttaatataaagtcgtctctccagaagactTAATTTAAAGTCGTCCGGGGAAAgcaaagtcgtccagaatttttcccaattttctggtcaaacctTGCTTATCCCGGACGACCTTAAATtaagtcgtttagctggacgactttcatctaagtcgtctggagaaagttaaatttcaagttttatttttcaattacaaaactaacctaggacgacttacacgta	..(((((((((((..((((((((((((....((((((((((........((((((((((((.((((((((((..((((((.((...((((((..((....))..))))))....)).))))))..)))))))))).))))))))))))........))))))))))....))))))))))))..)))))))))))...((((((.............))))))........(((.......))).	36.3	-97.8	1.1
AGAGTAAACTATTGGACCAAAACT	PC-3p-91	24	3'	14	2	11	2	chrC07	-	37357741	37357979	ctattttttcctctataatttccacaaaaatagagtaactttattatagggtaaattttgctccaatattttactctataaagtgaaaaagtaaaatctctctattttctcctctataatAGAGTAAACTATTGGACCAAAACTtattctataatatagttactctatttttgtgggaattatagcaaaaaaaataggtttgggttggagatggtcttggttagaaatttcatgtaact	(((((((((...((((((((((((((((((((((((((((.((((((((..(((.(((((.(((((((.((((((((((..((.((.((((((.........)))))).))..))...)))))))))).))))))).))))).)))..)))))))).))))))))))))))))))))))))))))...))))))))).....((((((((((..(((.....))).)))))...)))))	26.8	-91.4	1.4
ATATTCTGGTAAGAACCTCACCCT	PC-3p-92	24	3'	36	25	28	31	chrC05	-	7896483	7896701	gctgggttattAGGGTAGGGTTCTTAGCAGAATAtaagaacccgtctcttaacttttaactaaaaaaactaagaaccggttcttaaatagttaaaagttaagagacgtgttcttATATTCTGGTAAGAATCTCACCCTaagaaccccattaaacatgctctaaggtagcgacgaccacaaagtgaagtacacaaacactcaattcctttggactacaag	((.(((((.(((((((..((((((((.((((((((((((((.((((((((((((((((((((.......((((((....))))))..)))))))))))))))))))).)))))))))))))).))))))))..))))))).))))).........((((....))))))........(((((.(((................)))))))).........	37.4	-89.3	1.1
TGTTCTGTTTCAAATATATCTGAG	PC-3p-93	24	3'	49	26	38	32	chrC06	+	27411443	27411694	gctcttgcagctcttgttggttcactacctaaaacacaagaacaactcagatatatttgaaacagaacacacacaaccaaaacaggtaaacaacaacaacaacaacactcttcttttatgTGTTCTGTTTCAAATATATCTGAGttgttcttgtgttttaggtagtgaaccaacaagaggagaaagcaagagtggttctcaagtttgtgtggatggaaaagaacataggattaggattggaccagcatgtcc	((((((((..(((((((((((((((((((((((((((((((((((((((((((((((((((((((((((((....(((......)))................((.....))......)))))))))))))))))))))))))))))))))))))))))))))))))))))))))))))......)))))))).(((((....((..(....)..))..)))))..............((((......))))	38.1	-121.4	1.3
ACCGACGCATTTCCGACGAACCCT	PC-3p-94	24	3'	12	11	9	14	chrCnn_random	-	72580498	72580699	tttccgacgaacccctagaatttaagggtttttgtcggaaatgcatcggtaaataccgacggaataccgatgaacccctcaaattctaggggttcgtcggtattccgtcggtatttACCGACGCATTTCCGACGAACCCCtcaaatcctaggggttcgtcggtatataccgacggaataccgacggacattatcaatttaga	...(((((((((((((((.((((.((((..((((((((((((((.((((((((((((((((((((((((((((((((((........)))))))))))))))))))))))))))))))))).)))))))))))))).)))).)))).)))))))))))))))......(((.(((....))).)))................	47	-135.6	1.4
GATTAGTCGTTGGGCCTAGAAAGC	PC-3p-95	24	3'	71	23	55	29	chrA04_random	-	705045	705200	caaagactttctaggcccaaggactaatcactacgaggtcgcaggatccgcgttttcttatcacttaaggcactccaggtgcccaagtgaaatcgaacacagggcggtactcacagctgtGATTAGTCGTTGGGCCTAGAAAGCgtttggatcaca	((((..((((((((((((((.((((((((((...(((..(((.....((..((.(((...((((((..(((((.....))))).))))))....))).)).)))))...)))......)))))))))).))))))))))))))..)))).......	50	-68.6	0.9
CTTATCCCGGACGACCTTAAAA	PC-3p-96	22	3'	4	11	3	14	chrC02	-	44725484	44725729	taatttaactttaaccagacgacttaatataaagtcgtccctccagaagacttaaTTTAAAGTCGTCCGGGGAAAGCaaagtcgtccagaatttttcccaattttctggtcaaaccttgCTTATCCCGGACGACCTTAAATtaagtcgtttagctggacgactttcatctaagtcgtctggagaaagttaaatttcaagttttatttttcaattacaaaactaacctaggacgacttacacgtaag	.(((((((((((..((((((((((((....((((((((((........((((((((((((.((((((((((..((((((.((...((((((..((....))..))))))....)).))))))..)))))))))).))))))))))))........))))))))))....))))))))))))..)))))))))))...((((((.............))))))............((((....))))	37	-100	1.1
ATATTTCCCTGAGAACTCCGCCCT	PC-3p-97	24	3'	19	45	14	55	chrC05	+	4017047	4017303	tccacggtttcttagggcagaattcttaggaaaatataaaaaattgtttcttaattttcaactaaaaagttaagaaacaatttcttaattttttagttgaaaattaagaaacagtttcttATATTTCCCTGAGAACTCCGCCCTaagaaaccgtggataatgatgctcttataagatataggtaagtcagagcatgtttattgcatatctcttagattggagttcttaacgtaatataagatacggtctcttagctt	((((((((((((((((((.((.((((((((.((((((((.(((((((((((((((((((((((((((((((((((((...))))))))))))))))))))))))))))))))))))).)))))))).)))))))).)).))))))))))))))))))....((.(((((..(((((.(((.((((..((.....))....)))).))).)))))....)))))))....((((........))))............	30.4	-113.3	1.5
TATCCCGGACGACCTTAAAT	PC-3p-98	20	3'	17	11	13	14	chrC07_random	+	808825	809067	ttaactttaaccagacgacttaatataaagtcgtccctccagaagacttaATTTAAAGTCGTCCGGGGAAAGCaaagtcgtccagaatttttcccaattttctggtcaaaccttgctTATCCCGGACGACCTTAAATtaagtcgtttagctggacgactttcatctaagtcgtctggagaaagttaaatttcaagttttatttttcaattacaaaactaacctaggacgacttacacgtaagt	((((((((..((((((((((((....((((((((((........((((((((((((.((((((((((..((((((.((...((((((..((....))..))))))....)).))))))..)))))))))).))))))))))))........))))))))))....))))))))))))..))))))))......((((((.............))))))...........(((((....)))))	37.4	-99	1.1
ATTCTAAGAACTCCGGGTTAATCA	PC-3p-99	24	3'	32	15	25	19	chrC04	+	39108573	39108813	gttgtgttagaacatGATTAACCCGGGGTTCTTAGGATGgggttcttagcggtaggatggggttcttagcggaagttaagaaacagtttcttaacttccgctaagaactccATTCTAAGAACTCCGGGTTAATCAtggtcttagagcacttccaacgggaaaggtatatgtgttatgtatatatatatgtatgtatatattatatatgtataagtaattgtgggatctatagataaagatt	...((((((((.(((((((((((((((((((((((((((((((((((((((((((((.....((((((((....))))))))......)))))....)))))))))))))))))))))))))))))))))))))))).)))...))))).((((.........((((((((((.(((((((((((....))))))))))).)))))))))).........)))).................	36.5	-114.6	1.3
AGGAGCAGAACCAAGTTAGTC	PC-3p-100	21	3'	24	12	18	15	chrA01	+	7748390	7748573	tcaataagtttcagttctgatttatgcagcggagccaaGAGGATAACTTGGTTTTGCTCCTacttatgtgaatttctgaagtggatggagagaaagaagtccaagaaattccctataagtAGGAGCAGAACCAAGTTAGTCtcttgttagcccatagcatgataggaaaactgaacttttgtca	.(((.(((.(((((((((...((((((...((.((((((((..(((((((((((((((((((((((((.((((((((....(((((............)))))))))))))..)))))))))))))))))))))))))..))))))...))))...))))))..)))..))))))))))))...	39.1	-79.8	1.1
								chrC01	+	12417261	12417444	tcaataagtttcagttctgatttatgcagcggagccaaGAGGATAACTTGGTTTTGCTCCTacttatgtgaatttctgaagtggatggagagaaagaagtccaagaaattccctataagtAGGAGCAGAACCAAGTTAGTCtcttgttagcccatagcatgataggaaaactgaacttttgtca	.(((.(((.(((((((((...((((((...((.((((((((..(((((((((((((((((((((((((.((((((((....(((((............)))))))))))))..)))))))))))))))))))))))))..))))))...))))...))))))..)))..))))))))))))...	39.1	-79.8	1.1
TGCTTTCCCCGGACGACTTTAAAT	PC-3p-101	24	3'	60	92	46	114	chrCnn_random	+	53544852	53545096	tgaaatttaactttctccagacgacttagatgaaagtcgtccagctaaacgacttaaTTTAAGGTCGTCCGGGATAAGCAAggtttgaccagaaaattgggaaaaattctggacgacttTGCTTTCCCCGGACGACTTTAAATtaagtcttctggagggacgactttatattaagtcgtctggttaaagttaaattatgaagttttatttttcaattacaaaactaacctaggacgacttacacg	...(((((((((((..(((((((((((((...((((((((((..(((...(((((((((((((((((((((((..((((((((((...((((((..((....))..))))))..))))))))))..)))))))))))))))))))))))...)))..))))))))))...)))))))))))))..))))))))))).(((((.......)))))...............................	37.1	-112.7	1.2
ACTAAGTCGTCTAATTGGAAGACT	PC-3p-102	24	3'	12	18	9	22	chrC08	+	22272312	22272493	acttcacagacgacttataattaagtcgtctggaaagtcttccagctggatggcttagtagaagccttataattaagtcgtctgggaagactatccagactacttaattataagtcttctACTAAGTCGTCTAATTGGAAGACTtatcagacgacttaattataagttttctgcgaagtcgt	(((((.((((..((((((((((((((((((((..((((((((((..((((((((((((((((((.(((((((((((((.(((((((.......))))))).))))))))))))).))))))))))))))))))..))))))))))..))))))))))))))))))))..)))).)))))...	37.4	-116.2	1.7
ATATTCCGCTAAGAACTTCATCCT	PC-3p-103	24	3'	22	11	17	14	chrC06_random	+	3047397	3047595	gtttaatggaaggttcttaggatatggttcttagcggaatataagaagctaagaaccagtttaagatatttaaaaaccggttcttagcttttttagttaaaagttaagagacggattcttATATTCCGCTAAGAACTTCATCCTaaaaaccctccattaaacatgctcttaggtcattccatggccgtcgttttctctc	((((((((((.((((.(((((((..((((((((((((((((((((((((((((((((.((((...........)))).))))))))))..............(((....)))...))))))))))))))))))))))..))))))).)))).)))))))))).........((((((...)))))).............	35.7	-85.7	1.2
AAAGGGACTCTACGCTAAGGGCCT	PC-3p-104	24	3'	46	24	36	30	chrA01	-	14218686	14218847	tgctGGGTCCTTAAGCGTAGGGTCccttagcttttaactaaaaaagctaaggaacggcccttaaataagggatttgagagaagtcccttagcgtttttagttaaaagtTAAGGGACTCTACGCTAAGGGCCTcaacctaagggacaccaataatgatgccct	....((((((((.(((((((((((((((((((((((((((((((.(((((((.((..(((((....))))).(((....))))).))))))).))))))))))))))))))))))))))))))))))))))).......((((.((.((....)).))))))	43.8	-86.4	1.2
AACTTCCGCTAAGAACTCCACCCT	PC-3p-105	24	3'	69	64	53	79	chrC05	+	13978169	13978341	aaccttagagcatgactaaccggtggttcttAGGATGGGGTTCTTATCGGAAGTTaagaaacggtttcttaaattttaactaaaaaagctaagaaccggtttttaaataaggtttcttAACTTCCGCTAAGAACTCCACCCTaataaccccgagctaatcatggtcttagttt	...((.(((.(((((.((..(((.((((.(((((.(((((((((((.(((((((((((((((((((.((((..((((......))))..))))))))..............))))))))))))))).))))))))))).))))).)))))))...)).))))).))).))...	37.6	-70.5	1.1
CATCGATGACTGGAGTTCTCC	PC-3p-106	21	3'	1	10	1	12	chrA04	-	5385418	5385617	aaaatctttaccggaagaactccagttatcagtgtgggaacttccaaaagatttgcgatgacaagattcaggtatcttcaattgtccatcaagatttgggaacctttcggacagttcccaCATCGATGACTGGAGTTCTCCcagtaaagaatttggtggcaaaaagaccttgttttggtcggacgagtccagacttggag	(((.(((((((.((.(((((((((((((((..(((((((((((((.((((....(((((...(((((......)))))..)))))(((........)))....)))).))).))))))))))..))))))))))))))).)).))))))).)))...........((((.......))))...(((((....)))))...	43.5	-80	0.9
CTTATCCCGGACGACCTTAAAT	PC-3p-107	22	3'	20	14	15	17	chrC01	+	7532273	7532404	taaagtcgtccctccagaagactTAATTTAAAGTCGTCCGGGGAAAgcaaagtcgtccagaatttttcccaattttctggtcaaaccttgCTTATCCCGGACGACCTTAAATtaagtcgtttagctggacga	.....((((((........((((((((((((.((((((((((..((((((.((...((((((..((....))..))))))....)).))))))..)))))))))).))))))))))))........))))))	43.2	-61.2	1.1
TACAGTTGCAATGCTTGTGGGTCT	PC-3p-108	24	3'	7	11	5	13	chrC07	-	2199990	2200169	ttgcattgaagacaaaagtaagggcttcggttaccttgaGACCCACAAGCATTGCAACTGtagtcgagtctttgaacaagatgaagttgatgttcatgtgtgttcatcttgttcaaagactcattgacTACAGTTGCAATGCTTGTGGGTCTcaaggtaatcgaagctcttacttttgtc	..........(((((((((((((((((((((((((((((((((((((((((((((((((((((((((((((((((((((((((((..((.....))......))))))))))))))))))))...)))))))))))))))))))))))))))))))))))))))))))))))))))))))	41.1	-131.4	1.8
								chrC07	+	2199907	2200112	aagacaaaagtaagagcttcgattaccttgagacccacaagcattgcaactgtagtcaatgagtctttgaacaagatgaacacacatgaacatcaacttcatcttgttcaaagactcgacTACAGTTGCAATGCTTGTGGGTCTcaaggtaaccgaagcccttacttttgtcttcaatgcaatttcatgatccaccagaattgtat	((((((((((((((.((((((.(((((((((((((((((((((((((((((((((((...((((((((((((((((((((.................))))))))))))))))))))))))))))))))))))))))))))))))))))))).)))))).))))))))))))))..(((((((((..((......)))))))))))	39.8	-130.5	1.6
GCAGTGAGATATGAAGTTGGGTT	PC-3p-109	23	3'	22	2	17	2	chrCnn_random	-	17921877	17921994	taatttaactctacttcatttcttactccataatgaagtgatgaacaaaaaaaaatagattactctatttatggagtaaactctattatGCAGTGAGATTTGAAGTTGGGTTagagca	...((((((((.((((((..(((((((.(((((((..((.....))..........((.((((((((....)))))))).)).))))))).)))))))..)))))).))))))))...	28.8	-38.8	1.1
ATATTCCGTTAATAACTCCACCCT	PC-3p-110	24	3'	13	19	10	24	chrA04	+	4158663	4158845	gttatgtgtttcttgcccttaagaacataattaatttggggtttttagggtagggtttttaacggaatataagaaaccgtctcttaacctttttagttaaaagttaagagacggtttcttATATTCCGTTAATAACTCCACCCTcaccggtcatgttctgagagtttggatggtaataacatt	(((((....(((..((.(((.(((((((.((.....(((.......(((((.(((((.((((((((((((((((((((((((((((((.((((.....)))))))))))))))))))))))))))))))))).))))).)))))..))))).)))))))))).))..))).....)))))...	35	-77.6	1.2
AAGAGACACAATCTAAGAGACCTG	PC-3p-111	24	3'	27	1	21	1	chrC04	-	43948748	43948930	tAGGTCTCTTAGGTTAGATCTCTtagcgtaatataagatacggtctcttatatcttttatttaagagatttttttagtttttttagttaaaagctaagagaccgtatcttatattatgttAAGAGACTCAATCTAAGAGACCTGcaataaacattctccgagaaacctatgaacaatgaagtc	(((((((((((((((((.((((((((((((((((((((((((((((((((...((((((...((((((((.....))))))))....)))))).)))))))))))))))))))))))))))))))))).))))))))))))))).......................................	30.6	-78.8	1.4
AGTAGGGTTGGAGTAATTTTACTC	PC-3p-112	24	3'	37	10	29	12	chrA06	+	3831835	3831984	aatatggagtaagaaatgctccaacctaactccatatatcactccataatgaaatttactccataaatggagtaatcttttttttgtttgttcatcactccattatggagtgggaaatggAGTAGGGTTGGAGTAATTTTACTCcatttt	...(((((((((((..((((((((((..(((((((...(((((((((((((....((((((((....)))))))).........((......))......)))))))))))))...)))))))..)))))))))).)))))))))))...	33.3	-70.7	1.4
TGAACGTAGTTGTACTTGGACTA	PC-3p-113	23	3'	9	11	7	14	chrC02	+	19663296	19663458	aatttttttcaattttgtagtccAAGTACAACTATGTTCAAGCCGGTacaactcaaaaactggtacaactacgtgttaatatgttcatttagttgtaccaatttttgagttgtaccgactTGAACGTAGTTGTACTTGGACTAcgaaattaaaaaaaattagt	(((((((((.((((((((((((((((((((((((((((((((.((((((((((((((((.(((((((((((..((..........))..))))))))))).)))))))))))))))).)))))))))))))))))))))))))))))))).)))))))))...	31.3	-99.2	1.9
								chrC06_random	+	623734	623913	ttgtgtatagtacaactattttttttcaatttcgtagtccAAGTACAACTATGTTCAAGCCGGTacaactacatgttaatatgttcatttagttgtaccagtttatgagttgtaccgactTGAACGTAGTTGTACTTGGACTAtgaaattgaaaaaaaatagttgtaccatacacaaaat	((((((((.((((((((((((((((((((((((((((((((((((((((((((((((((.((((((((((.((((.......((.((......)).)).....)))))))))))))).)))))))))))))))))))))))))))))))))))))))))))))))))).))))))))...	31.1	-106.7	1.9
ACTCCACTCTAAGAACTCCGGGTT	PC-3p-114	24	3'	40	29	31	36	chrC05	+	17678785	17678871	tacgattaactCGGGGTTCTTAGGATGAGTTATtagcggaaattaacaACTCCACTCTAAGAACTCCGGGTTagtcatggtctaata	...((((((((((((((((((((..((((((.((((......)))).)))).))..))))))))))))))))))))...........	40.2	-37.9	1.1
ATATTCCCTTAAAAACTCTGCCCT	PC-3p-115	24	3'	29	38	22	47	chrA07	+	23916235	23916397	ataagagcattattatctagggtttttttagggaggttgttagggaaatataagaaacgatttcttaatttttaactaaaaaattaagaaattgtttctcaaaacaattttttATATTCCCTTAAAAACTCTGCCCTaagaaattccggataattgctctaaa	...((((((..(((((((.((..(((((((((((((((.((((((.(((((((((((((((((((((((((((.....))))))))))))))))))))).............)))))).)))))).))).)).))))))))))..)))))))))))))))...	26.4	-62.6	1.5
AACTCTACTCTAAGAACCCCGGGT	PC-3p-116	24	3'	28	27	22	33	chrA02_random	+	463969	464075	gcatttctagtgggttagagcatgAATAACCCGGGGTTTTTAGGATGGagtacttccgctaagAACTCTACTCTAAGAACCCCGGGTtaatcatggtcttacctttt	...........((((.(((.(((((.(((((((((((((((((..((((((.(((.....))).))))))..))))))))))))))))).))))).))).))))...	43.9	-56.9	1.2
GATACCAACTGATGAGCAGAAACT	PC-3p-117	24	3'	25	4	19	5	chrA10	-	16355860	16356014	ggatattctctgaatttctagttccattctataaagttttcgctacatcagttggtatcagagccatgttattctagttctatcctataaaaacatggttttGATACCAACTGATGAGCAGAAACTagatagaatttgattccaagaatacctgc	((.((((((..(((((.........(((((((..(((((..(((.(((((((((((((((((((((((((.((.(((.......))).)).))))))))))))))))))))))))))))..)))))..)))))))..)))))..))))))))...	34.2	-66.4	1.3
TTCCCCGGACGACTTTAAATTAAG	PC-3p-118	24	3'	20	24	15	29	chrC08_random	+	3951662	3951900	gtgtaagtcgtcctaggttagttttgtaattgaaaaataaaacttgaaatttaactttctccagacgacttagatgaaagtcgtccagctaaacgACTTAATTTAAGGTCGTCCGGGATaagcaaggtttgaccagaaaattgggaaaaattctggacgactttgctTTCCCCGGACGACTTTAAATTAAGtcttctggagggacgactttatattaagtcgtctggttaaagttaaat	...................((((((((.........))))))))....((((((((((..(((((((((((((...((((((((((..(((...(((((((((((((((((((((((..((((((((((...((((((..((....))..))))))..))))))))))..)))))))))))))))))))))))...)))..))))))))))...)))))))))))))..))))))))))	37.2	-113.1	1.3
								chrC02	+	44725550	44725796	aatttaactttctccagacgacttagatgaaagtcgtccagctaaacgacttaatttaaggtcgtccgggataagcaaggtttgaccagaaaattgggaaaaattctggacgactttgctTTCCCCGGACGACTTTAAATTAAGtcttctggagggacgactttatattaagtcgtctggttaaagttaaattatgaagttttatttttcaattacaaaactaacctaggacgacttacacgtaagt	(((((((((((..(((((((((((((...((((((((((..(((...(((((((((((((((((((((((..((((((((((...((((((..((....))..))))))..))))))))))..)))))))))))))))))))))))...)))..))))))))))...)))))))))))))..))))))))))).(((((.......)))))......................(((((....)))))	36.8	-114.7	1.3
TAACTTCTGCTAAGAACTCATCCT	PC-3p-119	24	3'	31	11	24	13	chrC04	+	25334701	25334810	catcatgattaatccggggttcttAGAGTGAGGTTCTTAACGGAAGTTaagaaactgtttctTAACTTCTGCTAAGAACTCATCCTaaaaaccctgggtttatcatgctc	...((((((.(((((((((((.((((..(((.(((((((.((((((((((((((...)))))))))))))).))))))))))..)))).))))))))))).))))))...	39.1	-56.8	1.3
AACTTCTGCTAAGAACCTCACTCT	PC-3p-120	24	3'	22	18	17	22	chrCnn_random	-	75649123	75649301	taacactaaaagaaatattcttagagcatgattaatccggggttcttAGGATGAGGTTTTTAGCGGAAGTTaagaaactgtttcttAACTTCTGCTAAGAACCTCACTCTaagaaccccgaattaatcatggtcttactttctttaggaatatgaatagtgacggcagattgattaagt	...(((((......((((((((((((((((((((((.((((((((((((..((((((((((((((((((((((((((...))))))))))))))))))))))))))..)))))))))))).))))))))))..........))))))))))))...)))))..................	35.2	-88.4	1.4
AACGGAATTAAAATTGAGGATTTC	PC-3p-121	24	3'	25	4	19	5	chrA07	-	12156535	12156724	aagatggatcataaaaataatcctcaactaaaaattccacgaaagaaactctaaactttaattatgttaacgtctatcaccttccgtcacagaattttagatggaagatgactgacatttAACGGAATTAAAATTGAGGGTTTCttttctcggagttttagttgagaagttatttgctattcatttttgg	(((((((((.....(((((((.(((((((.((((((((..((((((((((((.((.(((((((..(((((.(((..(((.((((((((...........)))))))).)))..)))..)))))..))))))).)).))))))))))))...)))))))))))))))..)))))))...)))))))))...	31.1	-63.4	1.1
AACTTCTACTAAGAACTCCACTCT	PC-3p-122	24	3'	29	35	22	43	chrCnn_random	+	17852163	17852350	tcttagaccatgattaacccgtagttcttAGAGTGAAGTTCTTACCGGAAGTTaagaaattgtttctaaccggttcttagcgtttttagttaaaagttaagaaacagttttttAACTTCTACTAAGAACTCCACTCTaagaaccccgggttaatcatggtctagcgaataacagattctacgggacct	(((((((((((((((((((((..((((((((((((.((((((((..((((((((((((((((((((((((......(((((.......)))))..))).)))))))))))))))))))))..)))))))).))))))))))))..))))))))))))))))))).)).....((.(((....))).))	37.2	-93.6	1.3
AGAAATTCTTTGTTAGACTTGGAC	PC-3p-123	24	3'	15	9	12	11	chrA09	+	32689145	32689221	aaaacatctcaagtctaccaaagaatttctatcttgaaaagggAGAAATTCTTTGTTAGACTTGGACtagatgtata	...((((((((((((((.((((((((((((.((((....)))))))))))))))).))))))))....))))))...	31.2	-34	1.4
AGAGACTGTATTTTATATTAC	PC-3p-124	21	3'	26	9	20	11	chrC03	+	48169661	48169860	cattggctcttttaacgtaatataagatacggtctcttatcttttaactaaaaaaattaaaaaacgtctattaaaaaagatatataagacacgtttcttagtttttttaattaaaagctaAGAGACTGTATTTTATATTACgttaagagatccaatctaagagaattgcagtaaacatgttctaaccctctgaccaagat	.(((((.((((((((((((((((((((((((((((((((.(((((((.((((((((((((.((((((...(((...........)))...)))))).)))))))))))).))))))).)))))))))))))))))))))))))))))))).)))))...((((....(((.......))).......)))).........	27	-72.5	1.3
CGCTGCAGCGCTGTGAACCT	PC-3p-125	20	3'	23	10	18	12	chrAnn_random	+	11962490	11962607	gccaggctcacaacgctgcagcgcaccgaccccaacccctccattatgagttctctctaactctataattaggttgttggggtcggtgCGCTGCAGCGCTGTGAACCTaggttcctag	((((((.(((((.(((((((((((((((((((((((.(((..((((((((((......))))).))))).)))..))))))))))))))))))))))).))))).))).)))......	55.9	-76.6	1.2
GAAGAATTCATTTTCCGTCGGAAC	PC-3p-126	24	3'	14	2	10	2	chrA03	+	973419	973570	cggaatattccgacgaaatgaattttcctcggaattccgtcggtatattccgaggaaattccgaggaagccaaattttgtgtttcctcggaattgcctcggaaattcctcggtatattccGAAGAATTCATTTTCCGTCGGAACgtccgtca	((((...(((((((((((((((((((..(((((((.(((..((....((((((((.(((((((((((((((((...))).)))))))))))))).))))))))...)).)))...))))))))))))))))))..))))))))..))))...	44.7	-78.1	1.1
								chrA02	+	18883373	18883535	cggtattccgtcggaatattccgacgagatgaattttcctcggaattccgtcggaatattccgaggaagccaaattttgtgtttcctcggaattgcctcggaaattcctcggtatattccGAAGAATTCATTTTCCGTCGGAACgtccgtcagaataccgctg	((((((((...((((...(((((((((((((((((((....(((((((((..((...((((((((((((((((...))).)))))))))))))..)).))))).)))).(((......))).)))))))))))..))))))))..))))...))))))))...	46.6	-76.4	1
ATATTACGATAAAAACTCTAACCT	PC-3p-127	24	3'	9	14	7	17	chrC05	+	30695803	30695972	agattcctgctacactgaatgaaagcacgtttattgcaggtcttttAGGCTGGGGTTCTTATCGTAATATaagatacggtctcttagcttttaactaaaaaaattaaaagactgtatcttATATTACGATAAAAACTCTAACCTaagaaacctgtaatatacatgctccg	.......................((((.((.((((((((((.(((((((.(((((((.((((((((((((((((((((((((.(((..((((......))))..))).)))))))))))))))))))))))).))))))).))))))).)))))))))).)).))))...	33.5	-73.3	1.3
AACTTCCGCTAAGAACTCCATCCT	PC-3p-128	24	3'	94	101	73	125	chrC02	+	25496999	25497161	ggtatcaagcgataatcatgctcttagaccatgattaacccgggattcttAGAGTGGAGTTCTTAGCGGAAGTTaagaaacagtttcttAACTTCCGCTAAGAACTCCATCCTaagaacccggggttaatcatgctctaagagcatgattaatgaggggtttt	...(((...(..((((((((((((((((.(((((((((((((((.(((((((..((((((((((((((((((((((((((...))))))))))))))))))))))))))..))))))))))))).))))))))).))))))))))))))))..)...)))...	41.7	-104.2	1.5
GAAATGGAGTAGGGTTGGAAC	PC-3p-129	21	3'	16	2	12	2	chrA06	+	13934539	13934705	aaaagtgaatatggagtaaggaatgctccaacccaactccatatctcactccataataaaatttactccataaatggagtaatctcttttttgtttgttcatcattctattatagagtgaGAAATGGAGTAGGGTTGGAACaattttactccattttcacttttact	(((((((((.((((((((((...((.((((((((.(((((((.((((((((.((((((....((((((((....)))))))).........((......))......)))))).)))))))).))))))).)))))))).))..)))))))))).)))))))))...	32.3	-76.3	1.4
								chrAnn_random	+	31389254	31389465	aacgtgaatatggagtatggaatgctccaacccaactccatatctcactccataatgaaatttactccataaatggagtaatctcttttttgtttattcatcactccattatggagtggGAAATGGAGTAGGGTTGGAACaattttacttcattttcacttttactccattttgaaggaaaaaatggagctttacattggagatgctctaaa	...(((((.((((((((.....((.((((((((.(((((((.(((((((((((((((....((((((((....)))))))).........((......))......))))))))))))))).))))))).)))))))).))....)))))))).))))).....(((((((((.......))))))))).......((((((...)))))).	34.9	-89.2	1.2
CTAAGAACCCCACCCTAAGAACCT	PC-3p-130	24	3'	1	9	1	11	chrC03	+	37722931	37723091	gagtcttagagcatgattattgGGAGGTTCTTAGGGTGGAGTTCTTagcggaatataagaacccgtctcttaacttttaactaaaaaaactaagaaccggctcttaaattccgCTAAGAACCCCACCCTAAGAACCTcccaataatcatgctcttaggtgg	...(((.((((((((((((((((((((((((((((((((.((((((((((((((.(((((..(((..(((((..((((......))))..)))))..))).))))).)))))))))))))).)))))))))))))))))))))))))))))))).)))...	41.6	-101.6	1.5
AATAGTTGGATTCTGATTCGGGCT	PC-3p-131	24	3'	53	21	41	26	chrC07	+	16314268	16314481	actccttggggtcaaatctaatttttgaaactttaatacgcctaagcctgaatctgaatccaacttttaaaatcgacctgactcattatccttgggaacacagtgggtcagatttattttAATAGTTGGATTCTGATTCGGGCTtggctgggttaaagtttcaaaaattcaatttgaccccaaggaattttcagtagatctaattagaccccgc	..(((((((((((((((..((((((((((((((((((..(((.(((((((((((.((((((((((.(((((((..(.((((((((((.(((...)))....)))))))))).)..))))))).)))))))))).))))))))))))))...))))))))))))))))))..)))))))))))))))............................	37.9	-105	1.3
GAGATATGAAGTTGGGTTGAAACA	PC-3p-132	24	3'	55	4	43	5	chrA08	+	8585806	8585985	tccaaaatagaataaaaattgatatagagtaaaaatgcttcaactccactttattttttactctattatgaacaaaaaaaatagattactgcataaataaaataaactctattatggagtGAGATATGAAGTTGGGTTGAAACAtttcttactacatatctatttttattctattttaaa	...((((((((((((((((.(((((..((((((((((.((((((((.(((((((.(((((((((((.............((((((......................))))))))))))))))).))))))).)))))))).))))).)))))..))))).))))))))))))))))...	22.2	-56.3	1.4
GGTCATGTCTGACAGCTTCACT	PC-3p-133	22	3'	131	53	101	66	chrC04	-	21778721	21778834	caagggaataagtgaagctgccagcatgatctatctttggttaagaaatgaatgtggaaacatgttgtttaaacccaggctaGGTCATGTCTGACAGCTTCACTccttcctggt	...(((((..((((((((((.((((((((((((.(((.((((...((((.((..((....))..)))))).)))).))).))))))))).))).))))))))))..)))))...	43	-51.8	1.1
AAAGAGAATTTGCCAAAGGACAAA	PC-3p-134	24	3'	25	4	19	5	chrA02_random	+	839824	839981	tgtgttcttagttTGTCCTTTGGCAAATTCTCTTTGAtattgataggtcccttgccaagagatatctattgttgatctagaaacatggatttgataccaattaaggtccctcttcaaatcAAAGAGAATTTGCCAAAGGACAAActaagaacacactt	((((((((((((((((((((((((((((((((((((((.((((.(((..(((((...(((....)))..(((..(((((......)))).)..))).....)))))..)))..))))))))))))))))))))))))))))))))))))))))))...	35.4	-80.8	1.4
TGACAACCCGTCCCATGGACC	PC-3p-135	21	3'	3	13	2	16	chrC02	-	29213521	29213752	agcgcaccaataacctaccttgggggagtttaggacacacagttgaggggttagggtcggtgtctgcagagccagcacggtgtccatgggcaggttgttatataaaagtcgacttttatgTGACAACCCGCCCCATGGACCccaagctggccctgtagagcaccgagcctaacccttctcctgtaagctttcactgacttctccatttaggttgttagtgcgcttggcgttc	(((((((.(((((((((...((((((((((...((...((((..(((((((((((.(((((((((((((.((((((..((.((((((((((.((((((((((((((((....)))))))))))))))).)))).)))))).))..)))))).))))))).)))))).)))))))))))..))))......))...))))))))))..))))))))).)))))))........	53	-142.7	1.2
ATATTCCGTTAAGAACTTCGCCCT	PC-3p-136	24	3'	19	7	15	8	chrCnn_random	+	5459152	5459320	cttagagtatgattaaagggaggttagggtgAGTTTTTAACGGAATATAAGAAACcgtcttttaacttttaactaaaaaagctaagaaccggttcttaaattaagagatgattttttATATTCCGTTAAGAACTTCGCCCTaagaatctctcattagtcatgctcttac	...(((((((((((((.(((((((((((((((((((((((((((((((((((((.(((((((((((((((......))))).((((((....))))))..)))))))))).))))))))))))))))))))))).)))))))...))))))).)))))))))))))...	32.5	-79.4	1.4
TTTCCCCGGACGACTTTAAATTA	PC-3p-137	23	3'	9	9	7	11	chrC03	+	9337632	9337870	gtgtaagtcgtcctaggttagttttgtaattgaaaaataaaacttgaaatttaactttctccagacgacttagatgaaagtcgtccagctaaacgactTAATTTAAGGTCGTCCGGGATaagcaaggtttgaccagaaaattgggaaaaattctggacgactttgcTTTCCCCGGACGACTTTAAATTAagtcttctggagggacgactttatattaagtcgtctggttaaagttaaat	...................((((((((.........))))))))....((((((((((..(((((((((((((...((((((((((..(((...(((((((((((((((((((((((..((((((((((...((((((..((....))..))))))..))))))))))..)))))))))))))))))))))))...)))..))))))))))...)))))))))))))..))))))))))	37.2	-113.1	1.3
TAAGAACCCACATTAATCATG	PC-3p-138	21	3'	68	85	53	105	chrC04	-	28850662	28850795	tatgtgctctaagagcatgattaatggaggttcttaggggtgggttcttagcgtaatttaagaaccgtttttaaattatgctaagaaccccactccTAAGAACCCACATTAATCATGgtgctatgatgcacggg	..(((((((..((..(((((((((((..((((((((((((((((((((((((((((((((((((...))))))))))))))))))))))).)))))))))))))..)))))))))))...))..)).)))))..	41	-75.8	1.4
GATTGATGCTTGGGATTTATTT	PC-3p-139	22	3'	23	8	18	10	chrC05	-	26607037	26607209	gttcactcttttgtcaggtattaacaagataaatcccaagcatcatccaccttattagtccttgaacatgaaggcttgtaaaatgGATTGATGCTTGGGATTTATTTtgtactctcctcttctaaaagagtgttgcctccataggactaccaatgatttcaggcttgttgaag	...((((((((((..(((.....((((((((((((((((((((((((((..(((..((.((((.......))))))..)))..)))).)))))))))))))))))))))).....)))....))))))))))..((((.(((.((....)).))).....)))).........	38.2	-64	1
TGAGGTCCTGGGTTCGAGACTT	PC-3p-140	22	3'	22	10	17	12	chrA02	-	23681479	23681645	actccataattaagttgttggtgAGTCTCGAACCCAGGACCTCACCCtttaacagcattcccacaagacaagctgtcatcaattggtgacagcttgttctgtgggaagactgttaaagggTGAGGTCCTGGGTTCGAGGCTTaccaacaacctaattatggagttag	((((((((((((.((((((((((((((((((((((((((((((((((((((((((..((((((((..(((((((((((((....)))))))))))))..))))))))..)))))))))))))))))))))))))))))))))))))))))).))))))))))))...	46.1	-140.4	1.8
AGAGACTGTATCTTATATTACGCT	PC-3p-141	24	3'	112	30	87	37	chrC02	+	1571985	1572192	ttgggtcttttaacgtaatataagatacaatctcttaacttttaactaaaaaaaactaagagacgtttcttatgatctcttatttaagagatgtctcttagtttttttagttaaaaaataAGAGACTGTATCTTATATTACGCTaagagacccaacctaagaaacgtacaataaacgtactcttacaaggggtagttcttagacgtct	((((((((((((.((((((((((((((((.(((((((..((((((((.((((((((((((((((((((((((............))))))))))))))))))))))))))))))))..))))))).)))))))))))))))).)))))))))))).(((((((.(((.......)))((((((.....)))))).)))))))......	29.8	-95.7	1.5
GAAATGGAGTAGGATTGGAGC	PC-3p-142	21	3'	14	4	10	4	chrA02	+	10912814	10912980	aaaagtgaatatggagtaaggaatgctccaacccaactccatatctcactccataataaaatttactccataaatggagtaatttattttttgtttgttcatcacttcattatggagtggGAAATGGAGTAGGATTGGAGCaattttacttcattttcacttttact	(((((((((.((((((((((...((((((((.((.(((((((.((((((((((((((.....((((((((....)))))))).........((......)).......)))))))))))))).))))))).)).))))))))..)))))))))).)))))))))...	32.3	-77.5	1.4
AAGGACCCAAGAGCAAGGACCACC	PC-3p-143	24	3'	25	7	19	8	chrC03	-	16632991	16633102	cttaggtcatgattatTGGGGGTCCTTGCTCTTGGATCCTtaatacacatatatttgtattAAGGACCCAAGAGCAAGGACCCCCcaataatcatgcccttaactctaaacc	...(((.((((((((((((((((((((((((((((.(((((((((((........))))))))))).)))))))))))))))))).)))))))))).)))............	42	-69.9	1.5
GCAAGTCGTCCTTGGCTATT	PC-3p-144	20	3'	25	5	19	6	chrC05	+	38305210	38305346	tatgtgaccaaagtagtgtgcagccaaggatgacttgccgatttaaaatatctgataagtattttatttcgtattttaaagaaaaaaaatcatgatcgGCAAGTCGTCCTTGGCTATAcgtttctttgtgtcgcgca	...((((((((((.(..((..((((((((((((((((((((((((((((((..((((((...))))))..))))))))..((.......))..))))))))))))))))))))))..))..).))))).)))))...	36.5	-61	1.2
TTTCCCCGGACGACTTTAAAT	PC-3p-145	21	3'	44	61	34	75	chrC02	+	434163	434398	aaatttaactttctccagacgacttagatgaaagtcgtccagctaaacgacttaaTTTAAGGTCGTCCGGGATAAGCAAggtttgaccagaaaattgggaaaaattctggacgactttgcTTTCCCCGGACGACTTTAAATtaagtcttctggagggacgactttatattaagtcgtctggttaaagttaaattatgaagttttatttttcaattacaaaactaacctaggacgac	.(((((((((((..(((((((((((((...((((((((((..(((...(((((((((((((((((((((((..((((((((((...((((((..((....))..))))))..))))))))))..)))))))))))))))))))))))...)))..))))))))))...)))))))))))))..))))))))))).(((((.......)))))........................	36.9	-112.7	1.3
								chrC01	+	36880599	36880834	aaatttaactttctccagacgacttagatgaaagtcgtccagctaaacgacTTAATTTAAGGTCGTCCGGGATaagcaaggtttgaccagaaaattgggaaaaattctggacgactttgcTTTCCCCGGACGACTTTAAATtaagtcttctggagggacgactttatattaagtcgtctggttaaagttaaattatgaagttttatttttcaattacaaaactaacctaggacgac	.(((((((((((..(((((((((((((...((((((((((..(((...(((((((((((((((((((((((..((((((((((...((((((..((....))..))))))..))))))))))..)))))))))))))))))))))))...)))..))))))))))...)))))))))))))..))))))))))).(((((.......)))))........................	36.9	-112.7	1.3
AATGGTCAAGATTGTTTCATCTCT	PC-3p-146	24	3'	10	9	8	11	chrA07	+	4619878	4619942	gcggagattacagtctggaccgttgattaaattcaatctAATGGTCCAGATTGTTTCATCTCTta	..((((((.(((((((((((((((((((......)))).)))))))))))))))...))))))..	38.5	-31.5	1.3
TTCAGATGGATCATCCGGATGACT	PC-3p-147	24	3'	18	6	14	7	chrCnn_random	+	44654849	44654944	ctccATCTGGATGAGCCATTTGGACGAAaatgaaagttttgtttgtttagacactaaaagtgcaattcaTTCAGATGGATCATCCGGATGACTttt	...(((((((((((.(((((((((.(((..........((((...(((((...)))))...))))))).))))))))).)))))))))))......	37.5	-33.8	0.9
ACTCTAAGAACTCCGGATTAATCA	PC-3p-148	24	3'	9	9	7	11	chrC08	+	25230815	25230950	ctaagagcatgattaatctggggtttttagcggaagttaataaacagtttcttaacttccgccaagaatttcACTCTAAGAACTCCGGATTAATCAtggtctaagagaccgacaatagaccctcggcaagatataa	((.(((.(((((((((((((((((((((((((((((((((.(((...))).)))))))))))..............)))))))))))))))))))))).))).))...((((..........))))..........	39	-50.8	1
GAGATTTGAAGTTGGGTTGGAGCA	PC-3p-149	24	3'	15	5	12	6	chrA07	-	17754594	17754803	gagtaaaagtgcaaatggagtaaaattgctctaatcctactccatttccactccataatggagtgatgaacaaacaaaaaatagattactccatttatggagtaaatttcattatggagtGAGATTTGGAGTTGGGTTGGAGCAttcttcactccatattcacttttactccattttagagaaaaaaatggagtgaggatggagatgccc	..........(((.(((((((.((..(((((((((((.((((((..((((((((((((((((((..((......)).........((((((((....)))))))))))))))))))))))).))..)))))).)))))))))))...)).))))))).((((..(((((((((((((.......)))))))))))))..))))..)))..	36.2	-89.6	1.2
AGCGAACTATAAGAACCTGTCTCT	PC-5p-1	24	5'	21	11	16	14	chrC09	+	7310007	7310164	agggtggggttcttAGCGAAATATAAGAACCTGTCTCTtaacttttaactaaaaaagctaagaaccgtctcgtaaaacttttatttaagagctgattcttagtttttttagttaaaaattaagagacgggttcttataaatttcgataataaccccac	...((((((((.(((.(((((((((((((((((((((((((.((((((((((((((((((((((.(..(((.((((.......)))).)))..).)))))))))))))))))))))).))))))))))))))))))))..))))).))).))))))))	31.6	-77.7	1.6
AGGATGAGGTTGTTAGCGGAAGTT	PC-5p-2	24	5'	24	4	18	5	chrCnn_random	-	75649123	75649301	taacactaaaagaaatattcttagagcatgattaatccggggttcttAGGATGAGGTTTTTAGCGGAAGTTaagaaactgtttcttAACTTCTGCTAAGAACCTCACTCTaagaaccccgaattaatcatggtcttactttctttaggaatatgaatagtgacggcagattgattaagt	...(((((......((((((((((((((((((((((.((((((((((((..((((((((((((((((((((((((((...))))))))))))))))))))))))))..)))))))))))).))))))))))..........))))))))))))...)))))..................	35.2	-88.4	1.4
AGCGGAATTTAAGAAATCATCTCT	PC-5p-3	24	5'	16	3	12	4	chrA06	+	1227864	1228033	atagagggttcttagagtatagtttttAGCGGAATTTAAGAAATCATCTCTtaacttttaactaaaaaagttaagagccggttcttagtttttttagttaaaagttaagaaatattttcttatattccgctaaaaactcctcattattcatgctctaagagcacctccaa	...((((((((((((((((((((((((((((((((.(((((((..((.(((((((((((((((((((((..((((((....))))))..))))))))))))))))))))).))..))))))).)))))))))))))))...........))))))))))))).))))...	29.4	-83	1.7
AAACCGTCTGTTAACTTTTAACTA	PC-5p-4	24	5'	15	10	12	12	chrC09	-	46642611	46642771	attaatggagaattcttaggtgaaattattagcagaatataagAAACCGTCTGTTAACTTTTAACTAaaaaatctaagataagagccagttattagattttttagttaaaaattaaaagacggtttcttatattccgctaaaaactccactctaaggacct	......((....((((((((((......(((((.((((((((((((((((((.((((.((((((((((((((((((((((........))).))))))))))))))))))).)))).)))))))))))))))))).)))))......))).))))))))).	28	-64.1	1.4
AGCGGATGTTAAGAAACAGTTTCT	PC-5p-5	24	5'	22	7	17	9	chrC02	-	19571769	19571925	agttcttagagtgaggttgttAGCGGATGTTAAGAAACAGTTTCTtaacttttaactaaaaaggctaagaaccggtttttaaagtctttatttaagaaccagttcttagatttttttgttaaaagttaagaaaccgtttcttaacttccggtaaaaa	...((((.....))))...(((.((((.((((((((((.(((((((((((((((((.(((((..((((((((.((((((((((.......)))))))))).))))))))..))))).))))))))))))))))).)))))))))).)))).)))...	29.9	-67.4	1.4
AGGATGAGGTTCTTATCGGAAGTT	PC-5p-6	24	5'	27	6	21	7	chrCnn_random	+	63358034	63358189	ttgtctaatatatttggtaataagagcatgattaacccgaggttattAGGATGAGGTTCTTATCGGAAGTTaacaaacagtttcttAATTTCTGCTAAGAACTTCACTCTaaaaatcccgggttaatcatggtctaattatttaatttttggagta	...(((((...(((..(((((.(((.(((((((((((((.((((.((((..(((((((((((.((((((((((.(((...))).)))))))))).)))))))))))..)))).)))).))))))))))))).))).)))))..)))..)))))...	31.4	-65.8	1.3
AGCGGAATATAAGAAATCGTCTCT	PC-5p-7	24	5'	97	39	75	48	chrC03	+	24338192	24338420	aacttccgctaagaacccaactctaagaaccccgggttaatcatggtagagcatgattaataggggtttttaggatggggttcttAGCGGAATATAAGAAATCGTCTCTtaacttttaactataaaaattaagaaccggctcttaaataagatattgaagaaccggttcttaacttttttagttaaaagttaagagacggtttttttatattccgctaagaactccaac	.....................((((((((((((..((((((((((......)))))))))).)))))))))))).(((((((((((((((((((((((((((((((((((((((((((((((.((((.(((((((((((.((((.((((...)))).)))).))))))))))).)))).))))))))))))))))))))))))))).))))))))))))))))))))..	34.9	-121.8	1.5
TGAGTCGTCTGAATTGTTGGA	PC-5p-8	21	5'	20	0	15	0	chrA04	+	2004564	2004742	agaagccatttttacgaatatagccccagtaaatcgtcTGAGTCGTCTGAATTGTTGGAagtcgtctagacgactgaaacttcagtcttctagacgactgaaacttcagtcgtctagACGACTTCCAACAATTCAGACGACtcagacgatttactggggctatattcgtaaaaatggct	...(((((((((((((((((((((((((((((((((((((((((((((((((((((((((((((((((((((((((((..(((((((........)))))))..)))))))))))))))))))))))))))))))))))))))))))))))))))))))))))))))))))))))))))	42.5	-152.2	2
GAATTTGCTCCAATGGTTCACTGT	PC-5p-9	24	5'	15	1	12	1	chrC08	+	22253031	22253160	aactctattatagggttGAATTTGCTCCAATGGTTCACTGTataacagatttacactataatagagtgaaatatacatgaatgttaactctattatagagtgaaccattggagcaaattcaactctattt	.........(((((((((((((((((((((((((((((.(((.........))).((((((((((((..(((((......))))).)))))))))))).)))))))))))))))))))))))))))))..	30	-64.6	1.7
AGCGGAATATAAGAATTTATCTCT	PC-5p-10	24	5'	19	17	15	21	chrC03_random	-	4615535	4615701	attcggaagttcggtagagttattAGCGGAATATAAGAATTTGTCTCTtaacttttaactaaaaaatctaagaactggttcttaaataagagttttaagagctggttcttaacttttttagttaaaaattaaaagataaaagatggattcttatattccgctaagaa	..((((....))))........(((((((((((((((((((..(((.(((.(((((((((((((((..(((((((..(((((((((.......)))))))))..)))))))..))))))))).......)))))).))).)))..)))))))))))))))))))...	26.9	-66.4	1.5
AGCGGATGTCAAGAAACTGTTTCT	PC-5p-11	24	5'	46	12	35	15	chrC03	-	23015684	23015872	cagactaagagcatcattaacccggggttcttagaatgaagttcttAGCGGATGTTAAGAAACTGTTTCTtaacttttaactaaaaaaactaagaactagttcttaaataaggactttaagaaccggttcttatctttttagttaaaagttaagaaacagttacttaacttccgctaagaactccactc	....((((((((..(........)..))))))))..((.(((((((((((((.((((((.(((((((((((((((((((((((((((...(((((((..(((((((((.......)))))))))..)))))))..))))))))))))))))))))))))))).)))))).))))))))))))).))...	32.8	-92.2	1.5
AGCGGAATATAAGAATTCGTTTCT	PC-5p-12	24	5'	25	21	19	25	chrC09	-	2637343	2637501	taaggtgaagtttttAGCGGAATATAAGAATTCGTTTTTtaatttttaactaaaaaaactaagaaccagttcttaaataaaagttttaagagacggttcttaagttttttagttaaaagttAAGAGACGGGTTTTTATATTCTACtaagaactacatcc	...((((.(((((((((..(((((((((((..(((((((((((((((((((((((((..((((((((..((((((((.......))))))))..))))))))..)))))))))))))))))))))))))..)))))))))))..))))))))).)))).	25.8	-76.2	1.9
								chrC09	-	42886040	42886221	ataagagcatgattattgggagtttttttagtagggtttttAGCGGAATATAAGAATTCGTCTCTtaatttttaactaaaaaggttaagaaccggttcttaaataagttaaaagttaagagacggatttttatatttcgttaagaacttcaccctaagaacctccaataatcatgctctaag	...((((((((((((((((..((((((...((..(((((((((((((((((((((((((((((((((((((((((((.......(((((((....)))))))...)))))))))))))))))))))))))))))))))))))))))))..))...))))))..))))))))))))))))...	30.2	-94.9	1.7
ATGATTATCGGAGGGTTCTTAAGT	PC-5p-13	24	5'	31	15	24	18	chrA06	-	19755905	19756051	aacctaagagcATGATTATCGGAGGGTTCTTAAGTtggggttcttagcggaatataagaactcgtcttttaacttttaacgaaaaaaactaaaaaccgtctcttAAGAACCGTCCCAATAATCATGCTctaagtatctaacaactgc	...((.(((((((((((((.(((.((((((((((...(((((((((........)))))))))...(((((..((((......))))..))))).......)))))))))).)))..))))))))))))).))..............	36.7	-49.8	0.9
TAAACCCTGAAGCCTCGGATA	PC-5p-14	21	5'	22	12	17	15	chrC04	+	40473307	40473459	ccctaatcactaaaccctaaactcttgaTAAACCCTGAACCCTCGGATAaatcataaactctaaatcaaaaatatttaaaattaaaccctagagtttatgatttatccaagggttcagagtttacccaagggtttagggtttagtgattaggt	.((((((((((((((((((((((((((.(((((.(((((((((.(((((((((((((((((((..........................))))))))))))))))))).))))))))).)))))..)))))))))))))))))))))))))).	34	-89.1	1.7
ATAATTGTCGGGTCCACAATT	PC-5p-15	21	5'	2	9	2	11	chrC02	-	32600912	32601118	tccaatgggggttcttcccattggagttcttaatatatgtattatgtatatattatatatgtgtaaATAATTGTGGGGTCCACAATTattgtggaaatccataaataagggttcttagggattcttaaaaccatgttttaagaacccttgcctatggggttccaCAAAAATTGTGGACCCCACAATTacttatacatatataatata	((((((((((.....)))))))))).......(((((.....))))).((((((((((((((((((.((((((((((((((((((((.((((((((..(((((..((((((((((((..(...............)..))))))))))))..)))))..)))))))).)))))))))))))))))))).))))))))))))))))))	32.4	-110.2	1.6
GAGGAAATCCAAGAGAGAGAGACA	PC-5p-16	24	5'	40	9	31	11	chrC03	-	18151611	18151789	tgagagattttggtgaagaactaagagagatatgtGAGGAAATCCAAGAGAGAGAGACAagaatatttgaggaacatttttccttagattgatttagtgtatacaatagttacataaatatattttgtctctctctcttggattccctcacatatctctcttagttcttcaccaaaatc	.....((((((((((((((((((((((((((((((((((.((((((((((((((((((((((..((((((((((.....))))))))))..(((((.((((.((....)))))))))))...)))))))))))))))))))))).))))))))))))))))))))))))))))))))))	33	-108.9	1.8
AGGGTCGGTGTCCTGCAGAGCTGT	PC-5p-17	24	5'	10	12	7	14	chrC09	+	29870654	29870877	ggtgaggtcttgggttcgagtaacgccaagcgcaccaataacctaccggtggatgtggaagcgtttcctcccatagtgaggggttAGGGTCGGTGTCCTGCAGGGCTGTgagccgggttccgagtaagcgggacgggttgtcaattttttttggacaaccccgtcctctcactcggaaccctggttcacagccctgcagggcactggccctaacccctcacagt	((.((((.((((((((.....))).)))))(((.(((...(((....))).....)))..)))...))))))...((((((((((((((((((((((((((((((((((((((((((((((((((.((.(((((((((((((((......)).))))).)))))))))).))))))))))).)))))))))))))))))))))))))))))))))))))))...	58.5	-154.9	1.2
AGTGGGAAATGGAGTGATGAACA	PC-5p-18	23	5'	19	1	15	1	chrC05	+	15468961	15469139	agagcatctacaactccactccataatttactgcaaaatagAGTGGGAAATGGAGTGATGAACAaacaaaaaaaattttactctatttatggagtaatcacttttttgttTGTTCATCACTCCATTTCTCACTCtattttgcagtaaattatggagtggggttggagatgcatgcgggg	...((((((.(((((((((((((((((((((((((((((((((((((((((((((((((((((((((((((((....((((((((....))))))))....))))))))))))))))))))))))))))))))))))))))))))))))))))))))))))))).))))))........	36.3	-124	1.9
ACCGGAATATAAGAATCTGTCTCT	PC-5p-19	24	5'	17	8	13	9	chrC03	+	8975001	8975159	tatggtgaggtttttACCGGAATATAAGAATCTGTCTCTtaatttttaaataaaaaagttaagaaccgtctcttaaaactcttatttaagagccggttcttagtttttttagttaaaagttaAGAGTCAGATTCTTATATTCCGCTaagaaccccactt	...((((.((((((((.(((((((((((((((((.((((((((((((((.(((((((..(((((((((.((((((((.......)))))))).)))))))))..))))))).)))))))))))))).))))))))))))))))).)))))))).)))).	30.2	-84.9	1.8
AGCGGATATAAGAGACGTCTCTTA	PC-5p-20	24	5'	27	18	21	22	chrC02	-	25879329	25879556	aaaagctaaaaaccgtctctcacccgaagttaagaatctcagttaagagattgaagttaatcatggccttatggagaatcttttAGCGAATATAAGAGACGTCTCTTAgcttttaactaaaaaaactaagagacatttcctaaataaaagatataagacgtttcttaattttttttagttaaaagctAAGAGACGTCATTATATTcgctcagagacaatccctaaaca	..............((((((...........((((.((((...((((....(((......)))....))))..)))).))))..(((((((((((..((((((((((((((((((((((((((((.((((((((.........................))))))))..)))))))))))))))))))))))))))).))))))))))).))))))............	31.6	-79	1.1
TGAACCCAAGATCTCACCCTT	PC-5p-21	21	5'	431	304	333	377	chrA07	-	3186652	3186758	tagcgttcctTGAACCCAAGACCTCACCCTTtaataactctcccacaggacaatctatcaccaattgatctTGTTAAAGGGTGAGGTCTTGGGTTAgaggaacgggt	...(((((((..(((((((((((((((((((((((((...(((....)))......((((.....)))).)))))))))))))))))))))))))..)))))))...	45.8	-58.4	1.2
ATCCTGATCTGGATTCGGTCCTTC	PC-5p-22	24	5'	14	4	11	5	chrA02	+	17010252	17010355	gacggtccaatattttactATCCTGATCCGGATTCGGTCCTTCtggatatccggattttcGGATCGGATCGAATCCGGATCtgggataaaaatccctgacctaa	...((((....(((((..((((((((((((((((((((((.((((((.((....)).))))))..)))))))))))))))).)))))))))))....))))...	46.2	-48.2	1
AGCGGAATATAAGAACCTGACTCT	PC-5p-23	24	5'	308	105	238	130	chrCnn_random	+	70441594	70441752	taaggtgggattcttAGCGGAATATAAGAACCTGACTCTtaacttttaactaaaaaaaggtaagaaccactcttaaataagagttttaagagacggtttttagcttttttagttaaaagttaagagacgggttcttatattccgctaagaacctcatcc	...((((((.((((((((((((((((((((((((.((((((((((((((((((((((.(.((((((((.((((((((.......))))))))..)))))))).))))))))))))))))))))))).)))))))))))))))))))))))).)))))).	33.3	-92.3	1.7
GCTCCAATGGTACTCTATTTCTC	PC-5p-24	23	5'	15	7	12	9	chrA09	+	23898951	23899164	tatagaagggacgggcctgtctccaaccccactctatttttcactctaaaatagagtttagagtagaaaatGCTCCAATGGTACTCTATTTCTCactctataatagagtgaaaaataggtttacttcaaatatagagtaatttgttttttctttgttcatcactttattttttactctaaaatagagtaccattggagcaaactcaaactctat	.......(((..(((......)))..))).((((((((((.......)))))))))).((((((.((...(((((((((((((((((((((............(((((((((((((((((......((((.(((((....)))))......))))......)).))))))))))))))))))))))))))))))))))))...))..)))))).	32.2	-72.4	1
ATCTGCATTAGTGAACTCCATGGG	PC-5p-25	24	5'	79	30	61	37	chrA07	+	10636728	10636836	gtcatggttagagcATCTGCATTAGTGAACTCCATGGGgagttcacacagtaaaaaaaaaaatgctttgtgaacccCTTCCAAGGGGTTCACTAATGCTGatgctctta	.........((((((((.(((((((((((((((.(((((.(((((((.((((..........)))).))))))).))..))).))))))))))))))).))))))))..	42.2	-56.9	1.2
AAAACCCTGAACCCTTGGATAAAC	PC-5p-26	24	5'	12	17	9	21	chrCnn_random	-	2582409	2582564	aaccctaatcacTAAACCCTGAACCCTTGGATAAACcctgaacccttggataaatcataaactctaaatcaaaaatatttaaaattaaactttacagtttatgatttatccaagggttcagagtttacccaagagtttagggtttagtgattagga	...(((((((((((((((((((((.(((((.(((((.((((((((((((((((((((((((((.((((......................)))).)))))))))))))))))))))))))).))))).))))).))))))))))))))))))))).	32.7	-90.2	1.8
GAGTGGAAAATGGAGTGATGAACA	PC-5p-27	24	5'	24	1	19	1	chrA09	+	31489750	31489960	agggttggagatgccctaagagcatctccaaccccactccatattttactccaaaattaagaaaatgGAGTGGAAAATGGAGTGATGAACAaaaaataaaagcattactctataaatggagtaatccttttatttttTGTTCATTACTCCATTTCTCACtctattttctcaattttggagtaaaatatggagtgggattggagatgcccta	(((((.......))))).((.((((((((((.((((((((((((((((((((((((((.(((((((((((((..((((((((((((((((((((((((((((.(((((((((....))))))))).))))))))))))))))))))))))))))..))))))))))))).)))))))))))))))))))))))))).)))))))))).)).	35.1	-138.2	1.9
AAAGCCTGAACCCTTGGATAAATC	PC-5p-28	24	5'	45	9	35	11	chrA01	+	17194578	17194781	tcttaataagactaaaccctaaatcctaaaccctaatcactaaagcataaacccgtggatAAAGCCTGAACCCTTGGATAAATCataaactctaaataaaaaatatttaaaattaaacactaaaatttatgatttatccaagggttcagaatttacccaaaggtttagggtttagtgattagtatttagggtttagtgttatta	...((((((.((((((((((((((........((((((((((((...((((((..(((.((((..((((((((((((((((((((((((...((((((.....))))))...(((.....)))..))))))))))))))))))))))))..)))).)))..))))))...)))))))))))).)))))))))))))).))))))	28.9	-86.4	1.5
AAACCCTGAACCCTTGGATAAACT	PC-5p-29	24	5'	13	4	10	5	chrA03	-	20754461	20754619	taaatcctaatcactAAACCCTGAACCCTTGGATAAACTctgaacccttggataaatcataaactgtaaatcaaaaatatttaaaattaaactctagagtttatgatttatccaagggttcagagtttacccaagggtttagggtttagtgattaggat	...(((((((((((((((((((((((((((((.((((((((((((((((((((((((((((((((.((..........................)).)))))))))))))))))))))))))))))))).)))))))))))))))))))))))))))))	32.1	-104	2
AGTATCCGTCGGAATTTCCTCAGA	PC-5p-30	24	5'	16	1	12	1	chrCnn_random	-	77172402	77172529	aattccgagggatatttaAGTATCCGTCGGAATTTCCTCGGAatattttcaattaaccgggcaaatatttcgcgaaaattgaaattggaattccgacggaattccgacggatactatccgtcggaccc	...(((((.((((.....((((((((((((((((((.(((((((..((((((((...((((........)).))..)))))))).....))))))).)))))))))))))))))))))).)))))...	42.2	-60.1	1.1
AACGGCATATAAGAACCTGACTCT	PC-5p-31	24	5'	28	11	21	13	chrC06	-	25811846	25812022	atgattattggagggttcttaaagtggggttcttAACGGAATATAAGAACCTGACTCTtaacttttaactaaaaaagctaagaaccggctcttaaataagagttttaagagacggttcttaacttttttagttaaaagttAAGAAACAGATTCTTATATTTCGCtaagaacctccca	............(((...........(((((((((.(((((((((((((.(((..((((((((((((((((((((((.(((((((((.((((((((.......)))))))).))))))))).))))))))))))))))))))))..))).))))))))))))).)))))))))))).	32.2	-84	1.5
TTAATTTAAGGTCGTCCGGGA	PC-5p-32	21	5'	33	36	25	44	chrC09	+	4787341	4787533	gaaatttaactttctccagacgacttagatgaaagtcgtccagctaaacgacTTAATTTAAGGTCGTCCGGGAtaagcaaggtttgaccagaaaattgggaaaaattctggacgactttgCTTTCCCCGGACGACTTTAAATTaagtcttctggagggacgactttatattaagtcgtctggttaaagttaaa	....(((((((((..(((((((((((((...((((((((((..(((...(((((((((((((((((((((((..((((((((((...((((((..((....))..))))))..))))))))))..)))))))))))))))))))))))...)))..))))))))))...)))))))))))))..)))))))))	39.4	-108.5	1.4
AGCGGAATATAAGAAATTGTCTCT	PC-5p-33	24	5'	35	11	27	13	chrC01	-	3707418	3707587	atggaggtttttagagtgaagttcttAGCGGAATATAAGAAATTGTCTCTtaatttttaactaaaaaaattattcttaaataagatatttaaaaataggttcttagtttttttagttaaaagttaagAGACGGTTTCTTATATTTCACTaaaaatctcactctaaaaatc	.....((((((((((((((..((.((((.(((((((((((((..((((((((((((((((((((((((((((..((((.................))))....))))))))))))))))))))))))))))..))))))))))))).)))).))..))))))))))))))	22.9	-72.7	1.9
AATTTAAAGTCGTCCGGGGAAAGC	PC-5p-34	24	5'	33	25	25	30	chrC01	+	13296560	13296734	tttaaccagacgacttaatataaagtcgtccctccagaagacttAATTTAAAGTCGTCCGGGGAAAGCaaagtcgtccagaatttttcccaattttctggtcaaaccttgctTATCCCGGACGACCTTAAATTaagtcgtttagctggacgactttcatctaagtcgtctggaga	.....((((((((((((....((((((((((........((((((((((((.((((((((((..((((((.((...((((((..((....))..))))))....)).))))))..)))))))))).))))))))))))........))))))))))....))))))))))))...	41.7	-88.4	1.2
ACTCGAACCCAAGACCTCACCCTT	PC-5p-35	24	5'	39	44	30	55	chrC04_random	+	3415402	3415629	acagttctgcagggcaccgaccctaacccctcacatgtgatccctcactgactccccatgtaggttattgatgcgcttggcgttACTCGAACCCAAGACCTCACCCTTtaacaacacacccacatgacgaattgccaccaattgacctgggggagtgttgttaaaaggtgaggtcttgggtttgagtaacgccaagtgcatcgataacctatatgggggagtcagtga	..........((((......))))......(((....)))....(((((((((((((((((((((((((((((((((((((((((((((((((((((((((((((.(((((((((((.(((.((.....(((((....)))))....)).))).))))))))))).)))))))))))))))))))))))))))))))))))))))))))))))))))).)))))))))	50.9	-145.6	1.3
GTTTTCGTTCTTGTGTGAAGC	PC-5p-36	21	5'	21	2	16	2	chrA07	-	16418671	16418819	ccaaatgaGTTTTCGTTCTTGTGGGAAGCaccaaacctgtaagaacttaccaagaatgattgtcttccactctgttactttttcttgcaccggaaagatccaataacgttcttacaggtttatgcttcccacaagaacgaaaactcatt	...(((((((((((((((((((((((((((..((((((((((((((....((((((.........................))))))....(((....)))......)))))))))))))).)))))))))))))))))))))))))))	39.6	-72.4	1.2
								chrC06	+	23258184	23258332	aaaagtgaGTTTTCGTTCTTGTGTGAAGCataaacctgtaagaacgtcattggatctttccggtgcaagaaaaagtaacagagtggaagacaatcattcttggtaagttcttacaggtttggtgcttcccacaagaacgaaaactcatt	...((((((((((((((((((((.(((((((((((((((((((((..((..(((....)))..))..............(((((((.......)))))))......)))))))))))))).))))))).))))))))))))))))))))	38.9	-72.1	1.2
AGCAGAATATAAGAACCTGACTCT	PC-5p-37	24	5'	52	23	40	29	chrC09	+	4437540	4437693	caaggttcttAGCAGAATATAAGAACCTGACTCTtaatttttaactgaaaaagttaagagtcggctcttaaatctcttatttaagagccgactcttagtattttcagttaaaagttAAGAGTCGGGTTCTTATATTCTGCtaagaaccatctgg	...((((((((((((((((((((((((((((((((((((((((((((((((..((((((((((((((((((((.....))))))))))))))))))))..))))))))))))))))))))))))))))))))))))))))))))))))......	33.8	-108.5	2.1
GGAGTGAGAAATGGAGTGATGAAC	PC-5p-38	24	5'	109	6	84	7	chrA03	+	25250011	25250209	gttatttagagcatctccaaccctactccatattttactccaaaatagaaaaaatGGAGTGAGAAATGGAGTGATGAACaaaaaataaaaacattactctataaatagagtaatcattttatttttTGTTCATTACTCCATTTCCCACTccattttatcaattttgtagtaaaatatggagtggggttggagatgtcct	.......((..((((((((((((((((((((((((((((.((((((.((.(((((((((((.((((((((((((((((((((((((((((..(((((((((....)))))))))..)))))))))))))))))))))))))))).))))))))))).)).)))))).))))))))))))))))))))))))))))..))	30.7	-122.9	2
GATTCGAACCCCCGACCTCACCCT	PC-5p-39	24	5'	26	36	20	45	chrC07	+	38379374	38379615	aacccgccccgtgggacccaggctgacagcgctgcagcgcaccgaccccaacccctccattatgggaactacctgccccataattaggttgttggtgaGATTCGAACCCCCGACCTCACCCTttaacagccttcccacaagacaagctgtcaccaattgatctgcagatcaattggtgacagcttgtcttgtgggaaggctgttaaAGGGTGAGGTCGGGGGTTCGAATCtcaccaacaacc	..........(((((...((((......((((....))))............(((........))).....)))).))))).....((((((((((((((((((((((((((((((((((((((((((((((((((((((((((((((((((((((((((((....))))))))))))))))))))))))))))))))))))))))))))))))))))))))))))))))))))))))))))	55.4	-182	1.4
AAACCGAACTGAACTGAACCGTT	PC-5p-40	23	5'	6	10	5	12	chrC06	+	1825675	1825821	tttatcggttcggttcggtttAAACCGAACTGAACTGAACCGTTcgggttgagaaaatcttcaaccgaatgatttgaaatggactttggtttgattcgaatcgctttcGGTTCGGTCGGTTCGGTTCGAtcgattcggttcgatttt	...((((..(((..((((((..(((((((((((.((((((((....(((((((......)))))))....((((((((...(((....)))...)))))))).....))))))))))))))))))).))))))..)))..))))...	43.5	-60.7	0.9
GAGAAAATCGACTGTGAGGAGAGA	PC-5p-41	24	5'	40	11	31	14	chrCnn_random	+	38576956	38577071	aatgctagagaGAGAAAATCGACTGTGAGGAGAGAgagagaatcggcatcttgtctttttattattagattatgatttgtactctttccatatttgtatttcctttctttagtctt	...(((((((((((.(((((((.(((..((((((((...((((((..((((...............))))..))))))...))))))))))).))).)))).)))))))))))...	32.8	-33.5	0.9
GAGAAAGTGAATCATCGGAAGATT	PC-5p-42	24	5'	14	1	11	1	chrA08	-	5975721	5975867	catGAGAAAGTGAATCATCGGAAGATTttctttgtcttttttagaaatttctgagaaaatattaattgtaccattcctctgacgattaatattttctcagaaatttctcataaagacgaaacaaatcttccgatgattcactttctc	...(((((((((((((((((((((((((..(((((((((...(((((((((((((((((((((((((((............)))))))))))))))))))))))))))...)))))))))..)))))))))))))))))))))))))	29.9	-82.6	1.9
GGAGTGGGAAATGAAGTGATGAAC	PC-5p-43	24	5'	13	0	10	0	chrA07	+	13397584	13397685	tagGGAGTGGGAAATGAAGTGATGAACaaaaaataaaaacattactctataaatggagtaatccttttattttttgttcattactctatttcctactccatt	...((((((((((((..(((((((((((((((((((((..(((((((((....)))))))))..)))))))))))))))))))))..))))))))))))...	28.4	-54.8	1.9
TACTCGAACCCAAGATCTCACCTT	PC-5p-44	24	5'	11	9	9	11	chrC09_random	-	2068446	2068611	aggttattggtgcgtctggcgtTACTCGAACCCAAGATCTCACCTTttaacaacactcttattggacgagttgtcaccaattgacctgcatatcaattggtgacaactcatcatgtacgagtgttgttaaaggatGAGATCTTGGGTTCGAGTAACGCTaagcgca	..........((((..((((((((((((((((((((((((((.(((((((((((((((.(((..((.(((((((((((((((((........))))))))))))))))).))..))).))))))))))))))).))))))))))))))))))))))))))..))))	44	-109.5	1.5
								chrC02	-	40816719	40816978	atggaccctaccgatcccgtggatccccggctcacagttctgtagagcaccgacctaatccctcacagatgagtcttcactaacttccccatgtaggttattgatgcgtttggcgtTACTCGAACCCAAGACCTCACCTTttaacaactctcacacaggacaagctgtcaccaattgaggtgcagatcaattggtgacatcttgtcctgtgggaaagttattaaagggtGAGGTCTTGGGCTCGAGTAACGCCaagcgca	......(((((.(((((...)))))...((((((....(((((.(((..............)))))))))))))).................))))).......(((((((((((((((((((.((((((((((((((((((((.((((.((.(((((((((((.(((((((((((((........))))))))))))).))))))))))).)).)))).)))))))))))))))))))).)))))))))))))))))))	50	-142.8	1.1
GCCGGAAGTTAAGAAACTGTTTTT	PC-5p-45	24	5'	13	5	10	6	chrC03	-	53747802	53747956	ccagggttcttaGCCGGAAGTTAAGAAACTGTTTTTtaattttaactaaagaaactaaaaatcagtttctaaataagaattttaagaactggttcttagcttttttaattaaaaatttagaAACAGTTTCTTAACTTCCGTCTAAgaattccact	...((((((((((.((((((((((((((((((((((...((((((.(((((((.((((.((((((((..((((.......))))..)))))))).)))).))))))).))))))....)))))))))))))))))))))).)))))))).))...	27.1	-65.2	1.6
ACCGGAATATAAGATCTCGTCTCT	PC-5p-46	24	5'	102	32	79	39	chrCnn_random	-	1768148	1768316	tgggaattttaagggtagagttcttACCGGAATATAAGATCTCGTCTCTtaacttttaactaaaaagactaagaactagttcttaaataaaagttttaaaaaccgatttttaatttttttagttaaaagttaagagacgggttcttatattccgttaagaacccctctc	...........((((....(((((((.((((((((((((.((((((((((((((((((((((((((((.((((((...(((.(((((.......))))).)))...)))))).)))))))))))))))))))))))))))).)))))))))))).)))))))))))...	29.6	-74	1.5
ATAAGATGGATGAGCCACTCCACT	PC-5p-47	24	5'	59	15	46	19	chrCnn_random	+	5577809	5577987	ccacatcggatattgaaagagatccttagtaatatATAAGATGGATGAGCCACTCCACTtatcaccaattggttttaggttgttaagctagacgagcttccaacctaaaaccaattggtgataagtggagtggtccatccatcttatatattaataagaatccctttcaatatccgatg	...((((((((((((((((.(((.((((.((((((((((((((((((..(((((((((((((((((((((((((((((((((..(((((.....))))).)))))))))))))))))))))))))))))))))..)))))))))))))))))).)))).))).))))))))))))))))	37.4	-123.4	1.8
AGTCTCGAACTCAGGACCTCACCC	PC-5p-48	24	5'	12	14	9	17	chrA02	-	23681479	23681645	actccataattaagttgttggtgAGTCTCGAACCCAGGACCTCACCCtttaacagcattcccacaagacaagctgtcatcaattggtgacagcttgttctgtgggaagactgttaaagggTGAGGTCCTGGGTTCGAGGCTTaccaacaacctaattatggagttag	((((((((((((.((((((((((((((((((((((((((((((((((((((((((..((((((((..(((((((((((((....)))))))))))))..))))))))..)))))))))))))))))))))))))))))))))))))))))).))))))))))))...	46.1	-140.4	1.8
AAAGTGAGGTTCTTATCGGAAGTT	PC-5p-49	24	5'	126	9	98	11	chrC06_random	+	3345841	3346011	agtgaccatgattaacccgaagtttttAAAGTGAGGTTCTTATCGGAAGTTaagaaactgtttcttaacttttaactaaaaaaactaagaaccggttcttaaatataagaaacagtttcttaaATTCTGTTAAGAATCTCACTCTAAgaacttcgagttaatcatgctctt	...((.((((((((((.(((((((((((.(((((((((((((.(((((.((((((((((((((((((..((((......))))..((((((....))))))....)))))))))))))))))).))))).))))))))))))).))))))))))).)))))))))).))..	30.4	-79.6	1.5
ATCGGAATATAAGAACTCGTCTCT	PC-5p-50	24	5'	456	145	353	180	chrC01	+	13405579	13405736	tagaatggagttcttATCGGAATATAAGAACTCGTCTCTtaacttttaattaaaaaagttaagaaccggctcttaaaatttttattcaaaaaccagttcttagcttttttagttaaaagttaagagacgagttcttatatttcgataaaaacatcacc	.....((..(((.(((((((((((((((((((((((((((((((((((((((((((((((((((((.((.......................)).))))))))))))))))))))))))))))))))))))))))))))))))))))).)))..))..	27.8	-79	1.8
ATCGGAATATAAGAATCTGTCTCT	PC-5p-51	24	5'	29	12	22	15	chrC08	-	27979304	27979464	cttaaggtgggattcttATCGGAATATAAGAATCTGTCTCTaacttttaattaaaaaagttaagaaccggctcttaaataagagttttaagaaccggtttttattttttttatttaaaaattaAGAGACGGGTTCTTATATTCCACTaaaaatctcacctt	...(((((((((((.(((..(((((((((((((((((((((((.((((((.(((((((..((((((((((.(((((((.......))))))).))))))))))..))))))).)))))).)).)))))))))))))))))))))..))).)))))))))))	28	-75	1.7
AGTGTAGAACCTCTACCCAAAAGT	PC-5p-52	24	5'	25	7	19	8	chrC03	-	47751895	47752116	acccattggagttctataaatgagtatgtgtgtatgtatatattgtatatgtgtatgtagttatgggatccactaaatAGTGTAGAACCTCTATCCAAAAGTtctaaaaacaaaacttttagaattTTTGGGTAGGAGTTCTACACTatttaatggaccccataactatatacacatatacaataaatacatacacacatatttatttttagaactccgatg	...(((((((((((((.((((((((((((((((((((((.(((((((((((((((((((((((((((.((((.(((((((((((((((..(((((((((((((((((((.......)))))))))))))))))))..))))))))))))))).)))).))))))))))))))))))))))))))).)))))))))))))))))))))).)))))))))))))	29.7	-144.6	2.2
AGCGGAATATAAGAACTCGGCTCT	PC-5p-53	24	5'	17	8	13	10	chrC08	-	37739687	37739862	atcattaacggggttcttagaacggggctcttAGCGGAATATAAGAACTCGGCTCTtaatttttcactgaaatgctaagagtcggctcttaaataagagatttaagagccgactcttaacttttccagttaaaagttaAGAGTCGGGTTCTTATATTCTGCTaagaaccatgtact	............((((...))))..((.((((((((((((((((((((((((((((((((((((.(((((((...(((((((((((((((((((.....)))))))))))))))))))...))).)))).)))))))))))))))))))))))))))))))))))).)).......	38.1	-93.7	1.4
TTGACCCTGGACGACTTAAAC	PC-5p-54	21	5'	94	49	73	60	chrC04	-	47896388	47896590	tagtatcaaatccagggttaactagttgtccagacgactgtaaaagttgtctggacgactagTTGACCCTGGACGACTTAAAAttaagtcttccgtggtcaactagtcgtccagacaactTACGTTTAAGTCGTCCAGGGACaactagtcgtccagacaacttttacagtcgtctggacaactagttaaccctggatttgata	...((((((((((((((((((((((((((((((((((((((((((((((((((((((((((((((.((((((((((((((((..(((((..((..(((............)))))..)))))..)))))))))))))))).))))))))))))))))))))))))))))))))))))))))))))))))))))))))))))))	43.3	-152.6	1.7
								chrC09	-	41534402	41534604	tagtatcaaatccagggttaactagttgtccagacgactgtaaaagttgtctggacgactagTTGACCCTGGACGACTTAAAAttaagtcttccgtggtcaactagtcgtccagacaactTACGTTTAAGTCGTCCAGGGACaactagtcgtccagacaacttttacagtcgtctggacaactagttaaccctggatttgata	...((((((((((((((((((((((((((((((((((((((((((((((((((((((((((((((.((((((((((((((((..(((((..((..(((............)))))..)))))..)))))))))))))))).))))))))))))))))))))))))))))))))))))))))))))))))))))))))))))))	43.3	-152.6	1.7
AGATACGGTCTCTTAACTTTTAGC	PC-5p-55	24	5'	55	19	43	24	chrC04_random	+	3818011	3818162	cgatcttagcgtaatataAGATACGGTCTCTTAACTTTTAGCtaaaaaaaactaagagacgtctcttaaataagatatataatataagagacgtctcttagctttttttaGTTAAAAGTTAATAGACCGTATCTtatattacggtaagaaat	...(((((.((((((((((((((((((((.((((((((((((((((((((.(((((((((((((((((.((..........)).))))))))))))))))).)))))))))))))))))))).)))))))))))))))))))).)))))...	27.6	-87.2	2.1
ATGGACTAAGAAATGCTCCAACCT	PC-5p-56	24	5'	48	7	37	9	chrA06	+	3831831	3831981	agtgaatATGGAGTAAGAAATGCTCCAACCTaactccatatatcactccataatgaaatttactccataaatggagtaatcttttttttgtttgttcatcactccattatggagtgggaaatggagtagggttggagtaattttactccat	.......(((((((((((..((((((((((..(((((((...(((((((((((((....((((((((....)))))))).........((......))......)))))))))))))...)))))))..)))))))))).)))))))))))	34.4	-70.4	1.4
GAGTGAGAAATGGAGTAATGAACT	PC-5p-57	24	5'	29	1	22	1	chrA09	-	31489835	31490030	cttagggcatctccaatcccactccatattttactccaaaattgagaaaataGAGTGAGAAATGGAGTAATGAACAaaaaataaaaggattactccatttatagagtaatgcttttattttttgttcatcactccattttccactccattttcttaattttggagtaaaatatggagtggggttggagatgctctt	...((((((((((((((((((((((((((((((((((((((((((((((((.(((((..(((((((((.((((((((((((((((((.(((((((........))))))).)))))))))))))))))).)))))))))..))))).)))))))))))))))))))))))))))))))))))))))))))))))).	33.2	-135	2.1
ATGATTAACCCGGGTTCTTAGGAT	PC-5p-58	24	5'	12	18	9	22	chrC04	+	47734405	47734520	agatataagagcATGATTAACCCGGGTTCTTAGGATggggttcttaacggaagttaagaaacagttttttaacttcgaaccctactctaagaaccccaggttaatcatggtctaag	.......(((.(((((((((((.((((((((((..((((((((......((((((((((((...))))))))))))))))))))..))))))))))..))))))))))).)))...	39.7	-59.6	1.3
AGCGGAATATAAGAACTCGTCTTT	PC-5p-59	24	5'	21	4	16	5	chrCnn_random	+	27853951	27854103	ttagggtttttAGCGGAATATAAGAACTCGTCTTTtaatttttagctaaaaaagttaagaaccgtctcttaaaactcttatttaagaaccggttttcagtttttttagttaaaatttaagagacagattcttatattttgttaaaatcctcat	...(((.(((((((..((((((((((((.(((((((((.((((((((((((((..(.(((((((..(((((((.......)))))))..))))))).)..)))))))))))))).))))))))))).))))))))))..))))))).)))...	26.1	-61.3	1.5
ACTTAATTTAAGGTCGTCCGGGAT	PC-5p-60	24	5'	27	20	21	24	chrC08_random	+	3951662	3951900	gtgtaagtcgtcctaggttagttttgtaattgaaaaataaaacttgaaatttaactttctccagacgacttagatgaaagtcgtccagctaaacgACTTAATTTAAGGTCGTCCGGGATaagcaaggtttgaccagaaaattgggaaaaattctggacgactttgctTTCCCCGGACGACTTTAAATTAAGtcttctggagggacgactttatattaagtcgtctggttaaagttaaat	...................((((((((.........))))))))....((((((((((..(((((((((((((...((((((((((..(((...(((((((((((((((((((((((..((((((((((...((((((..((....))..))))))..))))))))))..)))))))))))))))))))))))...)))..))))))))))...)))))))))))))..))))))))))	37.2	-113.1	1.3
GAATCCGACTCTTAACTTTTAACT	PC-5p-61	24	5'	57	19	44	24	chrC02	+	35698975	35699164	atgattactagaaggttcttagggcgaggttcttagcggaatataaGAATCCGACTCTTAACTTTTAACTaaaaaaactaagaatcggttcttaaataagagttttaagaaaagattcttaacttttttagttaaaagttaagagacggattcttatatttcgataagaacatcgctctaaaaacctccc	............(((((.(((((((((.(((((((.(((((((((((((((((.((((((((((((((((((((((..((((((((..((((((((.......))))))))..))))))))..)))))))))))))))))))))).))))))))))))))))).))))))).))))))))).)))))...	31.1	-98.7	1.7
GATTAACCCGGAGTTCTTAGATTG	PC-5p-62	24	5'	14	4	11	5	chrC04	-	48444997	48445125	attagaccatGATTAACCCGGAGTTCTTAGATTGgggttcttagcggaagttaagaaactgtttcttaacttttaactaaaaaagttaaaaacttcatcctaagaactccgggttaattatgctcttag	...(((.(((((((((((((((((((((((..((..(((((((((....))))))).........(((((((((......)))))))))..))..))..))))))))))))))))))))))).)))...	34.1	-62.3	1.4
ACCCTTGGATAAACCCTGAAGCCT	PC-5p-63	24	5'	16	16	12	19	chrC08	-	19272541	19272714	aaaccctaaaccctaatcactaaaccctaaACCCTTGGATAAACCCTGAACCCTtggataaatcataaactctaaatcaaaaatatttaaaattaaaccctagagtttatgatttatccaagggttcagggtttatccaagggtttagggtttagtgattagggtttagggatt	...(((((((((((((((((((((((((((((((((((((((((((((((((((((((((((((((((((((((..........................)))))))))))))))))))))))))))))))))))))))))))))))))))))))))))))))))))))))...	34.5	-129.8	2.2
								chrC03	-	50442471	50442661	taaatcttaataacactaaaccctaaaccctaatcactaaaccctaaACCCTTGGATAAACCCTGAACCCTtggataaatcataaactctaaatcaaaaatatttaaaattaaaccctagagtttatgatttatccaagggttcagggtttatccaagggtttagggtttattgattagggtttagggttt	.................(((((((((((((((((((.((((((((((((((((((((((((((((((((((((((((((((((((((((((..........................)))))))))))))))))))))))))))))))))))))))))))))))))))))).)))))))))))))))))))	32.5	-126.4	2
AGCCGGACGACTTAGAATTAAGTC	PC-5p-64	24	5'	46	10	35	12	chrC01	+	7532634	7532798	gtctgaagttttttttttaacaaacaaAGCCGGACGACTTAGAATTAAGTCgtcccttttaattttcaattgcaaaagtgacctctttagacgacttacctttaagtcttctggacgacttaatgctaagtcgtctgcggcaatgtttattgaacttcttcattt	...(((((.......(((((.(((((..((((((((((((((.((((((((((((..............(..(....)..).......(((.((((((....)))))).))))))))))))))).))))))))))..))))..))))).)))))...)))))...	35.8	-56.9	1
GACCCACAAGCATTGCAACTG	PC-5p-65	21	5'	44	60	34	74	chrC07	-	2199990	2200169	ttgcattgaagacaaaagtaagggcttcggttaccttgaGACCCACAAGCATTGCAACTGtagtcgagtctttgaacaagatgaagttgatgttcatgtgtgttcatcttgttcaaagactcattgacTACAGTTGCAATGCTTGTGGGTCTcaaggtaatcgaagctcttacttttgtc	..........(((((((((((((((((((((((((((((((((((((((((((((((((((((((((((((((((((((((((((..((.....))......))))))))))))))))))))...)))))))))))))))))))))))))))))))))))))))))))))))))))))))	41.1	-131.4	1.8
								chrC07	+	2199899	2200078	ttgcattgaagacaaaagtaagagcttcgattaccttgaGACCCACAAGCATTGCAACTGtagtcaatgagtctttgaacaagatgaacacacatgaacatcaacttcatcttgttcaaagactcgactacagttgcaatgcttgtgggtctcaaggtaaccgaagcccttacttttgtc	..........((((((((((((.((((((.(((((((((((((((((((((((((((((((((((...((((((((((((((((((((.................))))))))))))))))))))))))))))))))))))))))))))))))))))))).)))))).))))))))))))	41.1	-123	1.7
GCCTGAACCCTTGGATAAATC	PC-5p-66	21	5'	109	28	84	35	chrA06	+	3832425	3832564	cactaaaccctaaacccttggataaaGCCTGAACCCTTGGATAAATCataaactctaaatcaaaaatatttaaaattaaaccctagagtttatgatttattcaagggttcagagtttacccaagggttcatagtttaccc	...(((((....(((((((((.((((..(((((((((((((((((((((((((((((..........................)))))))))))))))))))))))))))))..)))).)))))))))....)))))...	33.6	-62.8	1.3
AGCAGAATATAAGAACCCGGCTCT	PC-5p-67	24	5'	36	43	28	53	chrC03_random	-	704438	704592	agtacatggttcttAGCAGAATATAAGAACCCGGCTCTtaacttttaactgaaaaagttaagagtcagctcttaaatctcttatttaaaagccgactcttagcattttcagttaaaaattaAGAGTCGGGTTCTTATATTCCACTaagagccccg	.......(((((((((..(((((((((((((((((((((((.(((((((((((((.((((((((((.(((.((((((.....)))))).))).)))))))))).))))))))))))).)))))))))))))))))))))))..)))))))))...	35.5	-87.3	1.6
AAACACTAAACTCTAAACCATTGG	PC-5p-68	24	5'	17	5	13	6	chrA03	-	17778287	17778453	taaatatttttaacgccgtcagcaaaacattaaaccataaatactAAACACTAAACTCTAAACCCTTGGataaaccataaaccctagagtttagaatttatctaagggtttaaaggttttgtgtttttgatttaggttttatgatttatccaagtgtttatggttta	..............(((((.((((((((((.(((((.(((((...((((((.(((((.((((((((((((((((...(((((......)))))...))))))))))))))))..))))).))))))...)))))))))).))).))).......)))).)))))...	28.1	-49.1	1
AACGGAATATAAGAACCAGTCTCT	PC-5p-69	24	5'	27	14	21	17	chrC01	-	6160039	6160227	gaggtgctctaagagcatgattattgggttcttagagtggggttgttAACGGAATATAAGAACCCGTCTCTtaacttttaactaaaaaagttaagaagcatctcttaaaactcttatttaaaaatcggttcttagctttttagttaaaagttaagagacgggttcttatattccgctaagaactccacc	.....(((((((((((...........)))))))))))((((((.(((.(((((((((((((((((((((((((((((((((((((((.((((((((.(.....(((((.......)))))......)))))))))))))))))))))))))))))))))))))))))))))))).))).))))))...	34.9	-93.7	1.4
GTTCCAATGGTGTTACTGTATAAT	PC-5p-70	24	5'	13	8	10	9	chrA05	-	20522766	20523006	atctagaactcacttttagtaccttcttaccatttccaaggggactctattttttctctataatttacataaaaatagaataactctattatagtgtaacttttGTTCCAATGGTGTTACTGTATAATagagttactctattatacagtaacaccattggaacaaaagttacactataatagagttactttatttttgtgaaaattatagaagaaaaaatagagttttattggagatgccc	..((((((.....))))))...........(((((((((...((((((((((((((((((((((((.((((((((((((.((((((((((((((((((((((((((((((((((((((((((((((((((((...)))))))))))))))))))))))))))))))))))))))))))))))))))).)))))))))))).)))))))))).))))))))))))))...)))))))))...	27.8	-134.4	2
AATATAAGATACGGTCTCTTAGCT	PC-5p-71	24	5'	27	15	21	18	chrC01	+	2526451	2526596	cttagcgtAATATAAGATACGGTCTCTTAGCTtttaactaaaaatgctaagagacgtcttttaaataattttagacgtaatataagatacagtctcttagtacttttaaactaAAAAGCTAAGAGACCGTATCTTATattacgata	.....((((((((((((((((((((((((((((((...(((((.(((((((((((....((((((....)))))).(((........))).))))))))))).))))).....))))))))))))))))))))))))))))))...	28.1	-66.6	1.6
AAGTCAACCCGCTGGTCAAAGATT	PC-5p-72	24	5'	20	9	15	11	chrCnn_random	+	29358528	29358726	tcgaaatttcgagtcagaacgcctttcgaacggtttaaaacgggtatttacggaaAAGTCAACCCGCTGGTCAAAGATTaattatttaactaattaattaattaattaattaattaaataattaatctttgaccagcgggttgacttttccgtaaatacccgttttaaaccgttcgaaaggcgttctgactcgaaattt	...((((((((((((((((((((((((((((((((((((((((((((((((((((((((((((((((((((((((((((((((((((((.(((((((((....))))))))).))))))))))))))))))))))))))))))))))))))))))))))))))))))))))))))))))))))))))))))))))))))	33.7	-156.1	2.3
								chrC03	+	11227548	11227746	tcgaaatttcgagtcagaacgcctttcgaacggtttaaaacgggtatttacggaaAAGTCAACCCGCTGGTCAAAGATTaattatttaactaattaattaattaattaattaattaaataATTAATCTTTGACCAGCGAGTTGActttcccgtaaatacccgttttaaaccgttcgaaaggcgttctgactcgaaattt	...((((((((((((((((((((((((((((((((((((((((((((((((((.(((((((((.(((((((((((((((((((((((((.(((((((((....))))))))).))))))))))))))))))))))))).))))))))).))))))))))))))))))))))))))))))))))))))))))))))))))	33.7	-144.8	2.2
ATCGGAATATAAGAACCTGACTCT	PC-5p-73	24	5'	66	33	51	40	chrC03	-	36526980	36527138	taaggtggagttcttATCGGAATATAAGAACCTGACTCTtaacttttaactaaaaaactaagaactgactcttaaataagagttttaagagacggttcttaattttttagttaaaagttaagagacgggttcttatattccgataaaaattctacccta	...(((((((((.(((((((((((((((((((((.((((((((((((((((((((((.(((((((((.((((((((.......)))))))).))))))))).)))))))))))))))))))))).))))))))))))))))))))).)))))))))...	29.6	-92.8	2
GACTTAATTTAAGGTCGTCCGGGA	PC-5p-74	24	5'	23	15	18	18	chrC03	+	58389386	58389636	tgaaatttaactttctatagacgacttagatgaaagtcgtccagctaaacGACTTAATTTAAGGTCGTCCGGGAtaagcaaggtttgaccagaaaattgggaaaaattctggacgactttGCTTTCCCCGGACGACTTTAAATTaagtcttctggagggacgactttatattaagtcgtctggttaaagttaaattatgaagttttatttttcaattacaaaactaaccttaggacgacttacacgtaagt	...(((((((((((...((((((((((((...((((((((((..(((...(((((((((((((((((((((((..((((((((((...((((((..((....))..))))))..))))))))))..)))))))))))))))))))))))...)))..))))))))))...))))))))))))...))))))))))).(((((.......))))).......................(((((....)))))	35.9	-109.1	1.2
								chrC05	+	27334577	27334822	tgaaatttaactttctccagacgacttagatgaaagtcgtccagctaaacGACTTAATTTAAGGTCGTCCGGGAtaagcaaggtttgaccagaaaattgggaaaaattctggacgactttGCTTTCCCCGGACGACTTTAAATTaagtcttctggagagacgactttatattaagtcgtctggttaaagttaaattatgaagttttatttttcaattacaaaactaacctaggacgacttacacgt	...(((((((((((..(((((((((((((...(((((((((...(((...(((((((((((((((((((((((..((((((((((...((((((..((....))..))))))..))))))))))..)))))))))))))))))))))))...)))...)))))))))...)))))))))))))..))))))))))).(((((.......)))))................................	36.6	-107.8	1.2
AGCGAAATATAAGAATCTGACTCT	PC-5p-75	24	5'	29	20	22	25	chrC04	-	23447638	23447798	cttgggatgaaatttttAGCGAAATATAAGAATCTGTCTCTtaacttttaactaaaaaaagttaaaaactagctcttaaataaagttttaatagacggttcttatcttttttaattaaaagttaAGAGACGGATTCTTATATTACGCTaaaaactccaccc	...(((.((...(((((((((.(((((((((((((((((((((((((((((...(((((((.(((.((((..((.(((((......))))).))..)))).))).)))))))..))))))))))))))))))))))))))))).)))))))))...)))))	26.7	-65.6	1.5
TAATTTAAGGTCGTCCGGGAT	PC-5p-76	21	5'	19	15	15	19	chrC03	+	9337632	9337870	gtgtaagtcgtcctaggttagttttgtaattgaaaaataaaacttgaaatttaactttctccagacgacttagatgaaagtcgtccagctaaacgactTAATTTAAGGTCGTCCGGGATaagcaaggtttgaccagaaaattgggaaaaattctggacgactttgcTTTCCCCGGACGACTTTAAATTAagtcttctggagggacgactttatattaagtcgtctggttaaagttaaat	...................((((((((.........))))))))....((((((((((..(((((((((((((...((((((((((..(((...(((((((((((((((((((((((..((((((((((...((((((..((....))..))))))..))))))))))..)))))))))))))))))))))))...)))..))))))))))...)))))))))))))..))))))))))	37.2	-113.1	1.3
GGGGGTTTTTAGGATGAAGTTCTT	PC-5p-77	24	5'	21	0	16	0	chrC07	-	39597259	39597424	tgtttaatGGGGGTTTTTAGGATGAAGTTCTTagcggaatataagaatccgtcttttaacttttaactaaaaaaactaagaaccggttctcaaatatctaagagacaggttcttatattcCGCTAAGAACTCCATCATAAGAATccccgttaaacatgctctaatg	(((((((((((((((((((.((((.((((((((((((((((((((((((.((((((((..((((......))))....((((....))))........)))))))).)))))))))))))))))))))))).)))).)))))))))))))))))))..........	34.3	-78.9	1.4
TTTAAGGTCGTCCGGGATAAGCAA	PC-5p-78	24	5'	21	27	16	33	chrC02	+	434163	434398	aaatttaactttctccagacgacttagatgaaagtcgtccagctaaacgacttaaTTTAAGGTCGTCCGGGATAAGCAAggtttgaccagaaaattgggaaaaattctggacgactttgcTTTCCCCGGACGACTTTAAATtaagtcttctggagggacgactttatattaagtcgtctggttaaagttaaattatgaagttttatttttcaattacaaaactaacctaggacgac	.(((((((((((..(((((((((((((...((((((((((..(((...(((((((((((((((((((((((..((((((((((...((((((..((....))..))))))..))))))))))..)))))))))))))))))))))))...)))..))))))))))...)))))))))))))..))))))))))).(((((.......)))))........................	36.9	-112.7	1.3
								chrCnn_random	+	53544852	53545096	tgaaatttaactttctccagacgacttagatgaaagtcgtccagctaaacgacttaaTTTAAGGTCGTCCGGGATAAGCAAggtttgaccagaaaattgggaaaaattctggacgacttTGCTTTCCCCGGACGACTTTAAATtaagtcttctggagggacgactttatattaagtcgtctggttaaagttaaattatgaagttttatttttcaattacaaaactaacctaggacgacttacacg	...(((((((((((..(((((((((((((...((((((((((..(((...(((((((((((((((((((((((..((((((((((...((((((..((....))..))))))..))))))))))..)))))))))))))))))))))))...)))..))))))))))...)))))))))))))..))))))))))).(((((.......)))))...............................	37.1	-112.7	1.2
GTTATCATTACTGTCGACCAGGAG	PC-5p-79	24	5'	10	9	8	11	chrC06	-	17907009	17907205	gatgaagtgttggggaaatacttctGTTATCATTACTGTCGACCAGGAGatccatatatatacaaggtattagaccgtcataaggtcatgtttatatatggacCTTCTGGTCGACACTAATGATAACagaagtattttcccaacacttcatttatcgaagccatttgcttttttctaatattcggataatcttcact	(((((((((((((((((((((((((((((((((((.(((((((((((((.((((((((((.(((........((((.......)))).))).)))))))))).))))))))))))).)))))))))))))))))))))))))))))))))))....(((((.....)))))..........................	35.5	-99.9	1.4
AGTAGGATTCTTAGCGGAGTATA	PC-5p-80	23	5'	20	9	15	11	chrC07	-	13106059	13106292	ataagaaccgtctcttaaccgaagctaagaaccccagttaagagactgaggttaatcatggtcttagaacatgattaatgagggtttgtagAGTAGGATTCTTAGCGGAGTATAagaaatcgtctcttaatttttaactaaaaaagctaagaaccggttcttaaatatcttttttagttaaaagttaagagacggtttcttATATTCCGCTAAAAACTTCACTCTaaaaacccc	.........((((((((((.................))))))))))....((((((((((.........))))))))))..((((((.(((((((((.((.(((((((((((((((((((((((((((((((((((((((((((((.((((((....)))))).....))))))))))))))))))))))))))))))))))))))))))))).))))).)))))).)))))).	34.2	-105.4	1.3
AAAACCCTGAACCCTTGGATAAAT	PC-5p-81	24	5'	22	9	17	11	chrA02	-	16037184	16037378	cttaataacactaaaccctaaaccctaatcactaaaccctaaacccttggaTAAACCCTGAACCCTTGGATAAATcataaactctagggtttaattttaaatatttttgatttagagtttatgatttatccaagggttcagggtttatccaagggtttagggtttagtgattagggtttagggtttagtgttatt	...((((((((((((((((((((((((((((((((((((((((((((((((((((((((((((((((((((((((((((((((((((...((((............)))).))))))))))))))))))))))))))))))))))))))))))))))))))))))))))))))))))))))))))))))))))))	33.3	-147.6	2.3
ATACTGTTGAAACAGGAGGACACC	PC-5p-82	24	5'	13	9	10	11	chrC05	+	29604195	29604281	taaaatatttcagtggcatgactctgtaaATACTGTTGAAACAGGAGGACACCtcaaAAAAGGGCCTTCTGTTTTAATAGTattgat	.........(((......))).......((((((((((((((((((((...(((......))).))))))))))))))))))))...	34.5	-28.1	0.9
AGCGGAATATAAGAATCTCTCT	PC-5p-83	22	5'	14	3	10	3	chrC02_random	-	4726403	4726583	agaatatgattatcggagtgttctaaaagtggaatttttAGCGGAATATAAGAATCTGTCTcttaacttttaattaaaaaagtttaaaactggctcgtaaataagagttttaagagacggttcttagtttttttagttaaaagttaagagacgggttcttatattcagcttagaactccac	(((((((..........)))))))....(((((.((((.(((.((((((((((((((((((((((((((((((((((((((..(...(((((.(((.((((.......)))).))).)))))...)..)))))))))))))))))))))))))))))))))))))).))).)))).)))))	29.8	-75.7	1.4
AGGGTAGGGTTCTTAGCAGAATA	PC-5p-84	23	5'	17	1	13	1	chrC05	-	7896483	7896701	gctgggttattAGGGTAGGGTTCTTAGCAGAATAtaagaacccgtctcttaacttttaactaaaaaaactaagaaccggttcttaaatagttaaaagttaagagacgtgttcttATATTCTGGTAAGAATCTCACCCTaagaaccccattaaacatgctctaaggtagcgacgaccacaaagtgaagtacacaaacactcaattcctttggactacaag	((.(((((.(((((((..((((((((.((((((((((((((.((((((((((((((((((((.......((((((....))))))..)))))))))))))))))))).)))))))))))))).))))))))..))))))).))))).........((((....))))))........(((((.(((................)))))))).........	37.4	-89.3	1.1
GTAGAGAACTCCCTTTGAAAAACT	PC-5p-85	24	5'	22	7	17	8	chrA07	+	15577839	15577958	aaattgtattatagaataatagttttaatttGTAGAGAACTCCCTTTGAAAAACTttagaacgctaaagtttttcaaagggagttctctacaaattaatactattattctaatacgactt	...((((((..((((((((((((.(((((((((((((((((((((((((((((((((((....))))))))))))))))))))))))))))))))))).))))))))))))))))))...	25	-70.8	2.4
AGCGGAATATAAGGAACCATCTCT	PC-5p-86	24	5'	41	12	32	14	chrC05	+	18177670	18177863	cgaggcccgtttagagcatgattaatgggggttcttagggtgggattattAGCGGAATATAAGGAACCATCTCTtaactcttaactaaaaaatctaagaaccgactcttaaatatcttatttaagagccgtttcttagtttttttagttaaaagttaagagacggtttcttatattccgctaaaaactccactt	.((((((((((............))))))...))))..(((((..((.((((((((((((((((((((.((((((((((.((((((((((((.(((((((.((.((((((((((...)))))))))).)).))))))).)))))))))))).)))))))))).)))))))))))))))))))).))..))))).	35.1	-93.2	1.4
ATTTAAAGTCGTCCGGGGAAAGC	PC-5p-87	23	5'	5	9	4	11	chrC07_random	+	808825	809067	ttaactttaaccagacgacttaatataaagtcgtccctccagaagacttaATTTAAAGTCGTCCGGGGAAAGCaaagtcgtccagaatttttcccaattttctggtcaaaccttgctTATCCCGGACGACCTTAAATtaagtcgtttagctggacgactttcatctaagtcgtctggagaaagttaaatttcaagttttatttttcaattacaaaactaacctaggacgacttacacgtaagt	((((((((..((((((((((((....((((((((((........((((((((((((.((((((((((..((((((.((...((((((..((....))..))))))....)).))))))..)))))))))).))))))))))))........))))))))))....))))))))))))..))))))))......((((((.............))))))...........(((((....)))))	37.4	-99	1.1
AATTAAGTCGTCTGCAAAGGA	PC-5p-88	21	5'	20	69	15	86	chrC05	+	18782382	18782455	gaagacttatAATTAAGTCGTCTGCAAAGTAttcccgctggaagactttccagacgacttaattataagtcttt	((((((((((((((((((((((((.(((((.((((....)))).))))).))))))))))))))))))))))))	36.5	-43.2	1.6
AGATACGGTCTCTTAGTTTTGAAC	PC-5p-89	24	5'	23	8	18	9	chrC08	-	22433970	22434150	tgcaggtcttttagattagggtttttaacgtaatataAGATACGGTCTCTTAGTTTTTAACtaaaaaaactaagaaacgtttcttatatctcttatttaagagatgtctcttagttttttttagttaaaagctaagagaccgtatcttatattacgctaaaaaccccaacctaagagatct	...(((((((((((.((.(((((((((.(((((((((((((((((((((((((((((((((((((((((((((((.((((((((((...........)))))))))).)))))).))))))))))))))))))))))))))))))))))))))))).))))))))).)).)))))))))))	29.3	-102.2	1.9
ACTATCCGGATCTGGATTCGGCCT	PC-5p-90	24	5'	23	10	18	12	chrC04	+	43453576	43453658	tACTATCCGGATCTGGATTCGGCCTctccggatatccggattttcggatcggatcacggatcgaatccggatctcggataaaa	...(((((((((((((((((((((..((((...((((((....))))))))))....)).))))))))))))).))))))...	50.6	-42	1
GAGTGGGAAATGGAGTAATGAACA	PC-5p-91	24	5'	33	3	25	3	chrA09	+	24620752	24620960	tgaactttttctatttagggcatctccaaccccactccatattttactccaaaattgagaaaataGAGTGGGAAATGGAGTAATGAACAaaaaataaaaggattactccatttatagagtaatgcttttattttttgtTCATCACTCCATTTCCCACTCCatattttccattttggagtaaaatatggagtggggttggagatgctctt	................(((((((((((((((((((((((((((((((((((((((.(((((.((.((((((((((((((((.((((((((((((((((((.(((((((........))))))).)))))))))))))))))).)))))))))))))))).)).))))).))))))))))))))))))))))))))))))))))))))).	34	-137.6	1.9
ATCGGAATATAAGAAACTGTCTCT	PC-5p-92	24	5'	224	78	173	97	chrA09	+	22787391	22787576	gttagaggatgattaatggagagttcttagggtaggattcttATCGGAATATAAGAAACTGTCTCTtaatttttaactaaaagagctaaaaaccggctcttaaataagatatttaagaactagttcttttttagttaaaagttaagaaataggtttttatattccgttaagaatttcatcttaaaa	.....(((((..((....))..)))))((((((..((((((((.(((((((((((((.((((.((((((((((((((((((((((.....(((..(.(((((((((...))))))))).)..))))))))))))))))))))))))).)))).))))))))))))).))))))))..))))))...	26.9	-67.9	1.4
TAATTTAAAGTCGTCCGGGGAAA	PC-5p-93	23	5'	17	9	13	11	chrC01	+	7532273	7532404	taaagtcgtccctccagaagactTAATTTAAAGTCGTCCGGGGAAAgcaaagtcgtccagaatttttcccaattttctggtcaaaccttgCTTATCCCGGACGACCTTAAATtaagtcgtttagctggacga	.....((((((........((((((((((((.((((((((((..((((((.((...((((((..((....))..))))))....)).))))))..)))))))))).))))))))))))........))))))	43.2	-61.2	1.1
								chrC07	+	3367737	3367981	ataatttaactttaaccagacgacttaatataaagtcgtctctccagaagactTAATTTAAAGTCGTCCGGGGAAAgcaaagtcgtccagaatttttcccaattttctggtcaaacctTGCTTATCCCGGACGACCTTAAATtaagtcgtttagctggacgactttcatctaagtcgtctggagaaagttaaatttcaagttttatttttcaattacaaaactaacctaggacgacttacacgta	..(((((((((((..((((((((((((....((((((((((........((((((((((((.((((((((((..((((((.((...((((((..((....))..))))))....)).))))))..)))))))))).))))))))))))........))))))))))....))))))))))))..)))))))))))...((((((.............))))))........(((.......))).	36.3	-97.8	1.1
AACGGAATATAAGAATTTGACTCT	PC-5p-94	24	5'	258	99	200	122	chrC07_random	-	1144953	1145130	acgattattggagggttcttaaggtggagtttttAACGGAATATAAGAATTTGACTCTtaatttttaactaaaaaaagctaagaaccggttcttaaataagagttttaagaaaatgttcttaacttttttagttaaaagttaagagacgagttcttatattccgctaagaacctcatt	.......................(((..(((((((.(((((((((((((((((.((((((((((((((((((((((.(.(((((((...((((((((.......))))))))...))))))).))))))))))))))))))))))).))))))))))))))))).)))))))..))).	28.7	-72.4	1.4
GTAGGGTCCCTTAACTTTTAACA	PC-5p-95	23	5'	16	11	12	14	chrC05	-	3472902	3473161	catcattatcggtgggctttaggttgaggcccttagcGTAGGGTCCCTTAACTTTTAACTaaaaacgctaagggacgacccttaaataagggactttagggtcgtcccttagcgtttttaGTTAAAAGTTAAGGGACCCTACGctaaaggcctcaacctaaagcccaccgataatgatgccctaagcaacgaacccttatctaacctacgcagcaggcgggctcggcttcacttgctacttgctagggtttgactgaagc	(((((((((((((((((((((((((((((((.((((((((((((((((((((((((((((((((((((((((((((((((((.(((........))))))))))))))))))))))))))))))))))))))))))))))))))))).)))))))))))))))))))))))))))))))..........((((((((..............((((((..(((............))).))))))))))))))........	48.1	-174.5	1.4
AACCGTCTGTTAACTTTTAACTA	PC-5p-96	23	5'	58	25	45	31	chrC06_random	+	3081769	3081954	ttaagagcatgattaatgggaggttcttagggtggggttcttgacggaatataagAACCGTCTGTTAACTTTTAACTAaaaaagctaagaaccagttcttaaagttaaaagttaaaagttaaaagacgggttcttatattctgctaagaacctcatcataaaactccccattaatcatgctctcgg	...(((((((((((((((((..(((.(((.((((((((((((..(((((((((((((((((((.(((((((((((((........((((((....))))))........))))))))))))).)))).)))))))))))))))..)))))))))))).))))))..)))))))))))))))))...	35.5	-97.6	1.5
TTAATTTAAGGTCGTCCGGGATA	PC-5p-97	23	5'	19	12	15	14	chrCnn_random	+	9270468	9270715	gaaatttaactttctccagacgacttagatgaaagtcgtccagctaaacgacTTAATTTAAGGTCGTCCGGGATAagcaaggtttgaccagaaaattgggaaaaattctggacgactttgCTTTCCCCGGACGACTTTAAATTaagtcttctggagggacgactttatattaagtcgtctggttaaagttaaattatgaagttttatttttcaattacaaaactaacctaggacgacttacacgtaag	..(((((((((((..(((((((((((((...((((((((((..(((...(((((((((((((((((((((((..((((((((((...((((((..((....))..))))))..))))))))))..)))))))))))))))))))))))...)))..))))))))))...)))))))))))))..))))))))))).(((((.......))))).......................((((....))))	37.1	-113.4	1.2
ACCGGAATATAAGAAACTGTCTCT	PC-5p-98	24	5'	98	16	75	20	chrC09	+	1789847	1790006	ttaggttggagttcttACCGGAATATAAGAAACTGTCTCTtaacttttaactaaaaaaaagtaagagttggctcttaaataagatatttaagaactggttattatatttttagttaaaagttaAGAAACGGTTTCTTATATTCTGCTaagaatttcaccc	...((.(((((((((((.((((((((((((((((((.((((((((((((((((((((...((((.((..((.(((((((((...))))))))).))..)).)))).)))))))))))))))))))).)))))))))))))))))).))))))))))))).	27.5	-72.4	1.6
GTTTTTAGCGGAATATAAGAACCT	PC-5p-99	24	5'	17	3	13	4	chrC04	+	45320846	45320992	ggaGTTTTTAGCGGAATATAAGAACCTgtcttttaacttttaactaaaaaaaactaagaaccagttcttaaataagagttttaagaactgattcttaatttttttagttaaaagttaaaagattggttcttatatttcgctaagaac	...(((((((((((((((((((((((..((((((((((((((((((((((((..((((((.(((((((((((.......))))))))))).)))))).))))))))))))))))))))))))..)))))))))))))))))))))))	25.2	-78.4	2.1
GTTCCGACGGAAAATGAATTCCTC	PC-5p-100	24	5'	26	6	20	7	chrA10	+	8914652	8914803	tgacggacGTTCCGACGGAAAATGAATTCCTCggaatatacagaggaatttccgaggcaattccgaggaaacacaaaatttggcttcctcggaatttcctcggaatattccgacggaattccgaggaaaattcatctcgtcggaatattccg	...((((.((((((((((...((((((((((((((((.......(((((((((((((.((((((((((((.((.......))..)))))))))))).)))))))).)))))......))))))))))..)))))).))))))))))..))))	45.4	-78.5	1.1
AGTATGCAAGTGTGAGGACCATT	PC-5p-101	23	5'	23	0	18	0	chrA08	+	12082408	12082554	gaatatataatAGTATGCAAGTGTGAGGACCATTtttttggaaagaacctgatgcaaaaggttctaaaaatagactaattcttaaaactttttgcatgaaattcttccaaaaaaatggttctcatacttacatacacttatataata	...(((((((..(((((.(((((((((((((((((((((((((.(((....((((((((((((.(((.(((......))).))).))))))))))))....)))))))))))))))))))))))))))).)))))..)))))))...	27.2	-61.4	1.5
AGCGGAATATAAGAATTTGTCTCT	PC-5p-102	24	5'	177	64	137	79	chrA09	+	5456891	5457048	agagtggagttcttAGCGGAATATAAGAATTTGTCTCTtaccttttaactaaaaaagctaagaaccggctcttaaataagatatttaagagccggatcttatgttttttagttaaaagttaagagacggattcttatatttcgctaagaacttcatcc	...(((((((((((((((((((((((((((..((((((((.(((((((((((((((..(((((.((((((((((((((...)))))))))))))).)))))..))))))))))))))).))))))))..)))))))))))))))))))))))))))..	32.3	-96	1.9
AATTAGATAAGTCACAGACCT	PC-5p-103	21	5'	30	11	23	14	chrA02	+	19655752	19655926	gttgaatctcaaacaaagcatagtgttgtttcatgAATTAGATAAGTCACAGACCTagtaagtgcagtgaagataacgcgttactatgatttgtttgtcttgaatcatcttcagttattaggtctgtgatttagctaattcacgaaaccattctgtgatttagttgagattttta	...(((((((((..(((.(((((..(.(((((.((((((((.(((((((((((((((((((.((.(((((((((((.(((...........)))))))))....))).)).)).))))))))))))))))))).)))))))).))))).)..))))).)))..)))))))))...	33.1	-67.8	1.2
CGGAATATAAGAACCTGTTTCTT	PC-5p-104	23	5'	23	13	18	16	chrC04	+	33439	33603	gttcttaggatgaagttcttatCGGAATATAAGAACCTGTTTCTTaacttttaactaaaaaagttaaaaaccggctcttaaataagagttttaagagccgatttttagtttttttagttaaaagttaagagacgatttcttatattccgttaagaatctcactct	......((..(((..((((((.(((((((((((((..(((((((((((((((((((((((((..((((((.(((((((((((.......))))))))))).))))))..)))))))))))))))))))))))))..))))))))))))).))))))..)))..))	28.5	-82.6	1.8
AAACTCAGGATGGACAGCGCC	PC-5p-105	21	5'	22	16	17	20	chrC03_random	+	535300	535413	tgtagtaagaagagccaatgAAACTCAGGATGGACAGCGCCaaaatatcgatttgaatgagatgatgatgatggcgctatccctcctgagctttacagattcttctgtactttc	...(((((((((((....((((.(((((((.(((.(((((((..(((((.((((.....))))))).))..))))))).))).))))))).))))....))))))).))))...	42.1	-42.4	0.9
TAACGGAATATAAGAACTCGACT	PC-5p-106	23	5'	40	18	31	22	chrCnn_random	-	59936422	59936577	ggttcttaggacggggctctTAACGGAATATAAGAACTCTACTcttaatttttaactgaaaatgctaagagtcggctcttaaataagagatttaagagccgactcttaactttttcagttaaaagttaAGAGTCGGGTTCTTATATTCTGTTaaaa	((..((......))..)).((((((((((((((((((((.((((((((((((((((((((((...(((((((((((((((((((.....)))))))))))))))))))...)))))))))))))))))))))).))))))))))))))))))))..	34	-88.1	1.7
CGACCTCACCCTTTAACAGCC	PC-5p-107	21	5'	19	24	14	29	chrC07	+	43221621	43221876	gtaacaacccgccccgtgggacccaggctgacagcgctgcagcgcaccgaccccaacccctccattatgggaactacctgccccataattaggttgttggtgagattcgaaccccCGACCTCACCCTTTAACAGCCttcccacaagacaagctgtcaccaattgatctgcagatcaattggtgacagcttgtcttgtgggaaggctgttaaagggtgaggtcgggggttcgaatctcaccaacaacctaattatgg	.......((((.....))))...((((......((((....))))............(((........))).....))))..(((((((((((((((((((((((((((((((((((((((((((((((((((((((((((((((((((((((((((((((((((((....)))))))))))))))))))))))))))))))))))))))))))))))))))))))))))))))))))))))))))))))))))))	53.9	-194.2	1.4
GAGTGGGAAATGGAGTGATGAACA	PC-5p-108	24	5'	40	4	31	5	chrA02	+	24596142	24596338	tattaggtcatctccaactccactccatattttactccaaaattgagaaaatgGAGTGGGAAATGGAGTGATGAACAaaaaataaaagcatcactctataaatgagtaatccttttattttttgttCATCACTCCATTTCCCACTCCATTttcccaattttggagtaaaatatggagtgaggttggagatgctctta	....((..((((((((((..(((((((((((((((((((((((((.((((((((((((((((((((((((((((((((((((((((((.((.((((.......)))).)).)))))))))))))))))))))))))))))))))))))))))).)))))))))))))))))))))))))..))))))))))..))..	34.5	-135.6	2
GAGTTTTGTGATTGTGCGAGAGTT	PC-5p-109	24	5'	4	9	3	11	chrC05	-	38650172	38650316	agatatcaatgtgtggtataacttatGAGTTTTGTGATTGTGCGAGAGTTttaggtttttgagtgagtttttcttaagattaataagaaagttattcttattattgagttttatacaattcaagattttatatatacgttgaatg	.....((((((((((.((((......((((((((.(((((((..(((.((......(((((((.........))))))).(((((((((.....)))))))))..)).)))..)))))))))))))))))))))))))))))...	25.5	-32.1	0.9
GTTTTGAGAGATTGGGAAGCT	PC-5p-110	21	5'	291	56	225	69	chrC07	+	9968288	9968451	atcggcagatacggtgatgtatgGTTTTGAGAGATTGGGAAGCTataacgttgcgtaacgaagaacacgtatattaataaaggtaacatacatcaccatatctccaaaaggctataaaaaggctagCTTCCCATCTCTCAAAACCAtacatcaccatatctcca	...((.(((((.(((((((((((((((((((((((.((((((((.......(((((..........)))))..........(((..........)))............((((.......))))))))))))))))))))))))))))))))))).))))))).	39	-68.3	1.1
ATATACCGACGGAACTGTTCCCTC	PC-5p-111	24	5'	24	15	19	19	chrCnn_random	+	73477158	73477323	agacatatatacatcgatcgatgggaATATACCGACGGAACTGTTCCCTCggattataccgagggatatcttcctcggaatattccgaggaacacgttcctcggaatattccgagggaacagttcctcggtatattctgaggaacatgtccctcggtatattttga	...........((((....)))).(((((((((((.(((..((((.(((((((.(((((((((((((...((((((((((((((((((((((....))))))))))))))))))))))...))))))))))))).)))))))))))..))).)))))))))))...	45.2	-98.5	1.3
AGAATGAGGTTCTTATCGGAAGTT	PC-5p-112	24	5'	14	5	11	6	chrCnn_random	-	75745651	75745823	cattagaccatgattaactcggagttgttAGAATGAGGTTCTTATCGGAAGTTaagaaacagttttttaactattaactaaaaaaactaagaaccggttcttagattttttagttaaaaattaaaaaaacagttttttaacttccgttaaaaaccttatcctaagaacttgag	.................(((.(((((.((((.((((((((.(((.(((((((((((((((..((((((((...((((((((((((.(((((((....))))))).))))))))))))...))))))))...))))))))))))))).))).)))))))).)))).))))))))	27.7	-65.5	1.4
TATAATTCAGTCGTCCGCCCG	PC-5p-113	21	5'	15	8	11	9	chrA06	+	12324858	12325006	cccagacaactTATAATTCAGTCGTCCGCCCGacgacttatatgtaagtcgtccagaattttattctgagattctggtcaaacctcttaaatcctggacgacttacatgcaagtcgtcggacggacgactgaattgtaagtcgtctata	...((((.((((((((((((((((((((.((((((((((..(((((((((((((((.(((......(((((....((.....)))))))))).)))))))))))))))..)))))))))).)))))))))))))))))))).))))...	43.6	-86.9	1.3
								chrC09	+	32869960	32870116	aactatacgcagaactTATAATTCAGTCGTCCGCCCGatgacttacatgtaagtcgtccaggattttattccgagattctggtcaaaccttgtaaatcctggatgacttacatgtaagtcgtCGGACGGACGACTAAATTGTAAGTcgtctatatat	...((((..(.(.((((((((((.(((((((((.((((((((((((((((((((((((((((((((........(((....))).........)))))))))))))))))))))))))))))))).))))))))).))))))))))))..))))...	40.8	-85.5	1.3
GGGTATTCTAAGAATCAACGGATT	PC-5p-114	24	5'	15	7	11	8	chrA05	-	14480835	14481097	agaatacattgatcttaggtatttttagactaaataagatctctgtgattatcttagttttccGGGTATTCTCAGAATCAACGGATTtccggaagccttataaaacagaactagaaatccGTTGATTCTGAGAATACCCGGAAAactaagataatcacagagatcttatttagtctaaaaatacctaagatcaatgtattcttaaattcgttgagatcaccaatgatctaccgaaaacaaagaataaagagagaactctcaat	(((((((((((((((((((((((((((((((((((((((((((((((((((((((((((((((((((((((((((((((((((((((((..(..................)..)))))))))))))))))))))))))))))))))))))))))))))))))))))))))))))))))))))))))))))))))))))))))....((((...((((((....))))))..)))).............((((....))))...	32.3	-162.7	1.9
AGAGTGGGATTCTTAGCGGAAGTT	PC-5p-115	24	5'	31	4	24	5	chrC06	+	17238572	17238723	ccgcttaagaccatgattaacccggaattcttAGAGTGGGATTCTTAGCGGAAGTTaagaaactgtttcttAACTTCTGCTAAGAACCATATCCTaagaactcgggttaatcatgctctaagatctctcgactgactgagccatttattaaa	...(((.(((.((((((((((((((..(((((((..((((.(((((((((((((((((((((...))))))))))))))))))))))).))..))))))).)))))))))))))).))))))....((((......))))............	39.5	-66.2	1.1
ACCGGAATATAAGAACTCGTCTCT	PC-5p-116	24	5'	156	58	121	72	chrC05	+	7823823	7823980	agagtggagttcttACCGGAATATAAGAACTCGTCTCTtaacttttaactaaaaaaattaaaaactggtttttaaaactcttatttaagaaccaattcttaatttttttagttaaaaattcagaaacgggttcttatattccgttaataacttcacct	((.((((((((.(((.((((((((((((((((((.(((.((.(((((((((((((((((((.((.(((((((((((.......))))))))))).)).))))))))))))))))))).)).))).)))))))))))))))))).))).))))))))))	26.6	-70	1.7
CGGGTATTTACGGAAAAGTCAACC	PC-5p-117	24	5'	17	12	13	15	chrC03	+	53933234	53933413	aatttcgagtcagaacgcctttcgaacggtttaaaaCGGGTATTTACGGAAAAGTCAACCcgctggtcaaagattaattatttatttaattaattaattaattaattaattaaataattaattaaattattaatctttgaccagcaggttgactttcccgtaaatacccgttttaaaccg	...((((((...........))))))(((((((((((((((((((((((.((((((((((.(((((((((((((((((.(((((.(((((((.((((((((....)))))))).))))))).))))).))))))))))))))))).)))))))))).)))))))))))))))))))))))	29.4	-96	1.8
AGCGGAATATAAGAACTTGTTTCT	PC-5p-118	24	5'	61	28	47	35	chrA05	-	22472521	22472698	taagcatgattaatgggaagttcttaggatggagttttaAGCGGAATATAAGAAATTGTTTCTtaacatttaattaaaaaagtttaaccggttcttagcttttttagtttaaagttaagagacgatttcttatattctgctaataacctcaacttaaaaacttccataatcatgcttt	.(((((((((((...(((((((.(((((.((..(((...((((((((((((((((((((((((((((.((.(((((((((((((............))))))))))))).)).))))))))))))))))))))))))))))...)))..)).))))).))))))).))))))))))).	27.5	-79.9	1.6
AAACCGAACTGAACTGAACCGTTC	PC-5p-119	24	5'	28	5	22	6	chrA06	+	23839018	23839166	ggtttatcggttcggtttggtttAAACCGAACTGAACTGAACCGTTCggattggaaaaatcttcaactgaaagatttgaaatggactttggtttggtccgaatcagtttcggttcggtcggttcggtttgatcggttcggtttgatttt	.....((((..((((..(((.((((((((((((((.(((((((((((((.(((((......))))))))))....((((..((((((.......))))))..))))...)))))))))))))))))))))))))..))))..))))...	42.3	-54.1	0.9
AATGTAGAAACCCTCAAACTAAAG	PC-5p-120	24	5'	16	9	12	11	chrC02_random	+	999648	999801	ggtaaaacccctcaactatgtttacttAATGTAGAAACCCTCAAACTAAAGatttaccggtagtaatgataattatgacctgctatggtttaattcattaaataaaattagtttgagggttttttcgttaaatatttagtttgagagtttttac	.((((((...((((((((....((.((((((.(((((((((((((((((...((((.......((((((..((((.((((......))))))))))))))..)))).))))))))))))))))).)))))).))..))))).)))...))))))	28.6	-42.9	1
AGGAATTAGAATGAAGAAGCTATC	PC-5p-121	24	5'	26	4	20	5	chrC01	-	23737774	23738023	aactttttcgtcattcttatcaaaccaggatgaaccgcgatataagaagcttgatatggatacataaagtagtggagaatcaccaggaagtttgaataaatctcatAGGAATTAGGATGAAGAAGCTATCccacattcaaatcaggtgatcctagttttcctatattcccaaacatgaaaacctgggatcacctgatttgaagtgggatagcttcttcatcctaactcctatgatatttatttaaacttc	..(((..((((((((((.........))))))....))))...)))..((((..((((....)))))))).(((......)))...(((((((((((((((.((((((((.(((((((((((((((((((((((.(((((((((((((((((((((((((................))))).))))))))))))))))))))))))))))))))))))))))))).)))))))).)))))))))))))))	36	-118.1	1.3
GATTAACCCGGGGTTCTTAGGATG	PC-5p-122	24	5'	68	43	53	53	chrC04	+	39108573	39108813	gttgtgttagaacatGATTAACCCGGGGTTCTTAGGATGgggttcttagcggtaggatggggttcttagcggaagttaagaaacagtttcttaacttccgctaagaactccATTCTAAGAACTCCGGGTTAATCAtggtcttagagcacttccaacgggaaaggtatatgtgttatgtatatatatatgtatgtatatattatatatgtataagtaattgtgggatctatagataaagatt	...((((((((.(((((((((((((((((((((((((((((((((((((((((((((.....((((((((....))))))))......)))))....)))))))))))))))))))))))))))))))))))))))).)))...))))).((((.........((((((((((.(((((((((((....))))))))))).)))))))))).........)))).................	36.5	-114.6	1.3
AGCGGAATATAAGAACTTGTTTC	PC-5p-123	23	5'	43	15	33	18	chrC06	-	31340949	31341098	ggttattAGCGGAATATAAGAACTTGTCTCttaatttttaactaaaaaaagttaagaaccggcttttagaaccggttcttaattttttttaagagccggttcttaattttttttagttaaaagttaagagacgggttcttatattccgct	.......((((((((((((((((..((((((((((((((((((((((((((((((((((((((((((((((...............))))))))))))))))))))))))))))))))))))))))))))))..))))))))))))))))	30	-89.7	2
AACTGTAAACCCTAAATCCAAACC	PC-5p-124	24	5'	14	10	11	12	chrC09	+	17788363	17788492	tataccctaaacccaaattatagaccctaaacccaAACTGTAAACCCTAAATCCAAACCtagacgctatagggtttagatttatggtttacggtttgggtttagaatctatgatttgggtttagggtttg	...(((((((((((((((((((((..((((((((((((((((((((.((((((.((((((..........)))))).)))))).))))))))))))))))))))..)))))))))))))))))))))...	36.9	-77.6	1.6
AATCTGGACGACTTATCTGTAAGT	PC-5p-125	24	5'	16	8	12	10	chrC06	+	12716778	12716926	ttttattaAATCTGGACGACTTATCTGTAAGTcgtctcaggttacttttgcaattggaaaataaaacttaaatatttaacttttcccagacgacttacgcggaagtcgtcaagtaagacgacttacttgaaagtcgtccagatttattt	......((((((((((((((((.((.(((((((((((.....((((.........((((((((((.........))))..))))))..((((((((......)))))))).)))))))))))))))..))))))))))))))))))...	34.2	-57	1.1
AATTTAAGGTCGTCCGGGATAAGC	PC-5p-126	24	5'	96	58	74	72	chrAnn_random	+	23171726	23171960	cgtcctaggttagttttgtaattgaaaaataaaacttgaaatttaactttctccagacgacttagatgaaagtcgtccagctaaacgacttAATTTAAGGTCGTCCGGGATAAGCaaggtttgaccagaaaattgggaaaaattctggacgactttgCTTTCCCCGGACGACTTTAAAttaagtcttctggagggacgactttatattaagtcgtctggttaaagttaaattatg	...........((((((((.........))))))))...(((((((((((..(((((((((((((...((((((((((..(((...(((((((((((((((((((((((..((((((((((...((((((..((....))..))))))..))))))))))..)))))))))))))))))))))))...)))..))))))))))...)))))))))))))..)))))))))))...	37	-114.7	1.3
								chrC08_random	+	2360672	2360919	cttacgtgtaagtcgtcctaggttagttttgtaattgaaaaataaaacttgaaatttaactttctccagacgacttagatgaaagtcgtccagctaaacgacttAATTTAAGGTCGTCCGGGATAAGCaaggtttgaccagaaaattgggaaaaattctggacgactttGCTTTCCCCGGACGACTTTAAATtaagtcttctggagggacgactttatattaagtcgtctggttaaagttaaattatg	((((....))))............((((((((.........))))))))...(((((((((((..(((((((((((((...((((((((((..(((...(((((((((((((((((((((((..((((((((((...((((((..((....))..))))))..))))))))))..)))))))))))))))))))))))...)))..))))))))))...)))))))))))))..)))))))))))...	37.1	-115.5	1.3
AGCGGAAAATAAGAACTCGTGTCT	PC-5p-127	24	5'	180	75	139	93	chrCnn_random	+	43498921	43499096	gattaatgggaggttcttagggtgagattcttAGCGGAAAATAAGAACTCGTCTCTtaacttttaactaaaaaaaactaagaaccggttattaaataatagatttaaaaactggttcttagcttttttagttaaaaattaagagacgggttcttatattccgctaagaaccctcat	.....(((((.(((((...(((......)))((((((((.(((((((((((((((((((.((((((((((((((..(((((((((((((.((((((.....)))))).))))))))))))).)))))))))))))).))))))))))))))))))).)))))))).))))))))))	31.2	-88.8	1.6
TGAAAAGTCTTCCAAATGGAC	PC-5p-128	21	5'	16	4	12	5	chrCnn_random	-	5027388	5027516	gactggaagacttgtaagtaatttaagtcgtcTGGAAAGTCTTCCAAATGGACgacttatatttaagtcatctactaagtcgtccagttggaagactttccagacgacttaattataagtcgtctacta	...((((.(((((((((.....(((((((((((((((((((((((((.(((((((((((................))))))))))).)))))))))))))))))))))))))))))))))).))))...	37.2	-71.6	1.5
AATAGGAACCCCTGAACCCAAACC	PC-5p-129	24	5'	10	12	8	14	chrC04	+	26921487	26921672	ctaaaccccaaactctaaacccaaaacactaaaccctaaaaccAATAGGAACCCCTGAACCCAAACCctaatgccttatccctaaatcctaaacccaaaatactaaaccctaaatacaatagggattagacatttggtttttggttcccgggatcctattgggtttagggcttagtattttggatt	....................((((((.(((((.(((((((.(((((((((.(((..(((((.(((((..((((.((.(((((((...................................))))))).)).)))).)))))..)))))..))).))))))))).))))))).))))).))))))...	39.2	-65.434	0.9
GAATTACGGCTGTGTAGAGCACTC	PC-5p-130	24	5'	104	49	81	60	chrC09_random	-	1366066	1366289	attttcttttaaagattttgggctctaactttagttttaattaataaagcttgattgttttaattttattgttctaaagaGAATTATGGCTGTGTAGAGCACTCacaaccaacaccaatcacctccattgggtatgattgccataaaataaatatatgctctagcacggtggttggtgttggccgtgaatgctctacacaaccataattctctctaaagcaata	........((((((...(..((((.((...(((((....))))))).))))..)...))))))...(((((((.((.((((((((((((.(((((((((((.((((..(((((((((((((((.......((((....))))..............(((....))).)))))))))))))))..)))).))))))))))).)))))))))))).)).)))))))	33.9	-90.2	1.2
GAGCGAGAAATGGAGCGATGAACA	PC-5p-131	24	5'	41	12	31	15	chrCnn_random	-	11615323	11615541	agcaagaacacatgaataaatgagcaagtgtatttccaactccaatctatattttactccaaaactgaaaaaattGAGCGAGAAATGGAGCGATGAACAaaaaataaaaacattactctataaataaagtaatgcttttatttttctgttcattactctatttttcactccattttttttttaattttgaagtaaaatatagagtggaatcagaaatgt	.......((((.((..........)).))))(((((....((((.(((((((((((((.(((((.((((((((..(((.(((((((((((..(((((((((((((((((.(((((((.((....)).))))))).)))))))))).)))))))..))))))))))).))).....)))))))).))))).))))))))))))).))))....)))))..	26.5	-73.5	1.3
GGGTCCTTAATCGTAGGGTC	PC-5p-132	20	5'	17	6	13	7	chrA01	-	14218686	14218847	tgctGGGTCCTTAAGCGTAGGGTCccttagcttttaactaaaaaagctaaggaacggcccttaaataagggatttgagagaagtcccttagcgtttttagttaaaagtTAAGGGACTCTACGCTAAGGGCCTcaacctaagggacaccaataatgatgccct	....((((((((.(((((((((((((((((((((((((((((((.(((((((.((..(((((....))))).(((....))))).))))))).))))))))))))))))))))))))))))))))))))))).......((((.((.((....)).))))))	43.8	-86.4	1.2
AGCGGAATATAAAAACTTGTCTCT	PC-5p-133	24	5'	15	8	12	10	chrC04	-	40291455	40291606	catgattattgagggttcttagggtggagtttttAGCGGAATATAAAAACTTGTCTCTtaagagttggttcttagcttttttagttaaaaattaagagacgggtttttatattccgctaaaattcctactttaagaacctccaataatcatg	(((((((((((..((((((((..((((((.((((((((((((((((((((..((((((((.......(((.((((((.....)))))).)))))))))))..)))))))))))))))))))))))).))..))))))))..)))))))))))	32.2	-79	1.6
AGACTTTATATGGGCTTTGAGACT	PC-5p-134	24	5'	49	7	38	9	chrA09	-	11386771	11386851	tcaaagcAGACTTTATATGGGCTTTGAGACTgaggtaagcctaatatccaagtCTCAAAACCCATATAAGATCTGCTtcta	...(((((((..(((((((((.(((((((((..((((.......))))..))))))))).)))))))))..)))))))...	38.3	-38.2	1.2
GTTCCGACGGAAAATGAATTCTT	PC-5p-135	23	5'	14	3	11	3	chrA06	+	17658061	17658204	gacGTTCCGACGGAAAATGAATTCTTcggaatataccgaggaacttccgaggaaattccgaggaaacacaaaatttggctttctcggaatttcctcggaatataccgacggaattccgagGAAAATTCATTCCGTCGGAATATT	...(((((((((((..((((((((((((((((...(((.((...(((((((((((((((((((((.((.......))..)))))))))))))))))))))....))..))).))))))))))..)))))))))))))))))...	43.1	-76.3	1.2
								chrA03	-	973522	973682	agcggtattctgacggacGTTCCGACGGAAAATGAATTCTTcggaatataccgaggaatttccgaggcaattccgaggaaacacaaaatttggcttcctcggaatttcctcggaatataccgacggaattccgaggaaaattcatttcgtcggaatattcc	..(((....)))..(((..((((((((((..((((((((((((((((...(((.((...((((((((.((((((((((((.((.......))..)))))))))))).))))))))....))..))).))))))))))..))))))))))))))))..))).	44.7	-75.4	1
AGCGGAATATAAGAATTCGTCTCT	PC-5p-136	24	5'	128	43	99	53	chrC04_random	+	3979553	3979726	ttattgagagattcttagagtgaggttcttAGCGGAATATAAGAATTCGTCTCTtaacttttaactaaataaattaaatatcttatttaaaagccggttcttgatttttttaattaaaagttaagagacggatttttatatttcgctaagaactccatcctaaaaaactttcga	...(((((((.((.((((..((..((((((((((((((((((((((((((((((((((((((((.((((.(((((((..(((.............)))..))))))).)))).))))))))))))))))))))))))))))))))))))))))..))..)))).)).)))))))	27	-77	1.6
GAGTGAGAAATGGAGTGATGAACA	PC-5p-137	24	5'	438	42	339	51	chrUnn_random	+	435882	436064	tacttagagcatctccaaccctactccataatttactgcaaaataGAGTGAGAAATGGAGTGATGAACAaacaaaaaactcattactctatttatggagtaatcacatttttgtttGTTCATCACTCCATTTTCCACTCCattttgcagtaaattatgaagtggggttgcagatgctcttact	.....(((((((((.((((((((((.((((((((((((((((((.(((((..(((((((((((((((((((((((((....(((((((((....)))))))))....)))))))))))))))))))))))))..))))).)))))))))))))))))).)))))))))).)))))))))....	35	-112.8	1.8
AGCGGAATATAAGAACTCGACTCT	PC-5p-138	24	5'	156	52	121	64	chrC07	-	36821326	36821499	attaacgggggttcttaggacggggctcttAGCGGAATATAAGAACTCGACTCTtaatttttaactgaaaatgctaagagtcggctcttaaataagagatttaagagccgactcttaactttttcagttaaatgttaAGAGTCGGGTTCTTATATTCTGTTaagaaacctgtac	...................(((((..(((((((((((((((((((((((((((((((..((((((((((((...(((((((((((((((((((.....)))))))))))))))))))...))))))))))))..)))))))))))))))))))))))))))))))..)))))..	36.8	-100.7	1.6
ATATTCCGACGAATTCTGGGCGTC	PC-5p-139	24	5'	18	12	14	14	chrC02	+	2855265	2855414	attggtATATTCCGACGAATTCTGGGCGTCggaatataccgacggacaacggttcctcggacaataccgacggagagcattcctcgaaaaataccgacgaaccaatgtctgtcggtatattccgacgcccagaattcgtcggaatatacc	...(((((((((((((((((((((((((((((((((((((((((((((..(((((.((((.......(((.((((....))))))).......)))).)))))..)))))))))))))))))))))))))))))))))))))))))))))	49.3	-105.8	1.4
CGAGAAGTTGGAGGATTGCAAACT	PC-5p-140	24	5'	21	2	16	2	chrA09	+	30966107	30966267	taaaaatcttatatatataaagCGAGAAGTTGGAGGATTGCAAACTgaattatgagtctatgacttttaaaaatcttatatatatagttgtttataatagtcatagactcataattcagtttgcaatcctccaacttctcgctttgattataggatttaaa	...((((((((((....((((((((((((((((((((((((((((((((((((((((((((((((.(((.((((.((((....))))..)))).))).))))))))))))))))))))))))))))))))))))))))))))))))..))))))))))...	26.7	-94.2	2.2
GATACGGTCTCTTAGCTTTTAACT	PC-5p-141	24	5'	63	21	48	25	chrC08	+	22433882	22434064	attgcagatctcttaggttggggtttttagcgtaatataaGATACGGTCTCTTAGCTTTTAACTaaaaaaaactaagagacatctcttaaataagagatataagaaacgtttcttagtttttttagttaaaaactaagagaccgtatcttatattacgttaaaaaccctaatctaaaagacct	.....((.(((.(((((((((((((((((((((((((((((((((((((((((((.(((((((((((((((.((((((((((((((((....))))))).........)))))))))))))))))))))))).))))))))))))))))))))))))))))))))))))))))))).))).))	29	-101.1	1.9
								chrC04	+	7124156	7124349	aagagcatgtttattacagatctcttaggttggatttcttatcgtaatataaGATACGGTCTCTTAGCTTTTAACTagaaaagctaagagacgtctcttaaataagagatataagagacgtctcttaaataagagatataagagacgtctcttagcttttttagttAAAAGCTAAAAGACCGTATCGCTAaaaa	...(((.....(((((((((..(((......)))..)))....))))))...((((((((((.(((((((((((((((((((((((((((((((((((((.((.....((.((((((....)))))).)).....)).))))))))))))))))))))))))))))))))))))).))))))))))))).....	31.4	-91.2	1.5
AATAACACAATCTTATTGGTCGGT	PC-5p-142	24	5'	17	9	13	11	chrC03_random	+	4612110	4612271	aaaagatatccaatatgaAATAACACAATCTTATTGGTCGGTgaacccaagaataagtcttctttaatgagttatttttggagttattcttgggttcaccccctagggtgaacctttagattcaccaaccaataggattgtgttatttcatattcgatattt	...(((((((.(((((((((((((((((((((((((((.(((((..((((((((((.((.........)).))))))))))......(((.((((((((((....))))))))))..))).))))).))))))))))))))))))))))))))).)))))))	33.3	-83.3	1.5
GTAGGGTCTCTTAACTTTTAACT	PC-5p-143	23	5'	38	13	29	16	chrC04	+	1100987	1101174	tgtcgggcaacattataggcggtcccttaggctgggcctttaagcGTAGGGTCTCTTAACTTTTAACTaaaaacgctaagggacttctctcaaatcccttatttaaaagccgtcccttagcgtttttaGTTAAAAGTTAAGGGACCTtacgcttaagggcccagcctaagggaccgcctataatgttg	.......(((((((((((((((((((((((((((((((((((((((((((((((((((((((((((((((((((((((((((((..((...((((.....))))...))..)))))))))))))))))))))))))))))))))))))))))))))))))))))))))))))))))))))))))))))	45.2	-144.9	1.7
AGCGGAATATAAGAACCTGCCTCT	PC-5p-144	24	5'	10	8	8	10	chrC03	+	47893610	47893810	agattagtcgggtacagttagagcatgattattgggggttcttagggtgaggttcttAGCGGAATATAAGAACCTGCCTCTtaacttttaactaaaaaagctaagaaccggttcttaaataagagttttaagagccggttcttaacttttttagttaaaagttaagagacatgttcttatattccgctaagaacccactct	...................(((((.............))))).((((((.(((((((((((((((((((((((.((.(((((((((((((((((((((((.((((((((((((((((((.......)))))))))))))))))).))))))))))))))))))))))).)).)))))))))))))))))))))))))))))	36.3	-108.3	1.5
GTAAGAACCTCATCTTAAGAACCT	PC-5p-145	24	5'	21	20	16	25	chrC04	-	47657931	47658139	gtatttaagaaccggttcttattttttttttagttaaaagttaaaaaacgatttcttatattctaGTAAGAACCTCATCCTAAGAACCTccattaatcatgctctaagagcataattaaccCGGGGTTCTTAGGATGCGGTTCTTagcggaagttaagaaactgtttcttaacttttaactaaaaaagctaagaaccggttattaaaat	...(((((.((((((((((((...((((((((((((((((((((.((((..(((((((..((((..((((((((.(((((((((((((((..(((((.((((((...)))))).)))))...))))))))))))))).))))))))..))))..)))))))..)))).)))))))))))))))))))).)))))))))))).)))))..	31.1	-100.4	1.5
AACGGAATATAAGAACTCGTCTC	PC-5p-146	23	5'	15	6	11	7	chrC05	+	2246012	2246173	ggttcttagggtagagttcttAACGGAATATAAGAACTCGTCTCttaacttttaactaaaaaagctacgaaccgtgtcttaaaactcttatttagagccggttcttaacttttttagttaaaagttaagagacagattcttatattccgttaagaactccac	..........((.(((((((((((((((((((((((((.(((((((((((((((((((((((((.((.((((((.(..(((((.......)))))..))))))).)).))))))))))))))))))))))))))).))))))))))))))))))))))).))	33.3	-82.2	1.5
ATTCAACCCCTTAACTCTAAACCT	PC-5p-147	24	5'	6	20	5	25	chrA05	+	13251591	13251752	atctccaaaacccaaccccttaactctatccccaaaATTCAACCCCTTAACTCTAAACCTagattagttaactaaaaggtaaaaatgtatttttaccctagggtaactaatctagacttagggtttatagttaaggggttgagttttggggatatggtttca	.....................(((..((((((((((((((((((((((((((.(((((((((((((((((.(((...((((((((....)))))))).)))..)))))))))).......))))))).))))))))))))))))))))))))))..)))...	35.8	-73.2	1.3
ACCGGAATATAAAAACTTGTCTCT	PC-5p-148	24	5'	43	24	33	30	chrC04	-	24115427	24115595	gattattgggggttcttaggatgagattcttACCGGAATATAAAAACTCGTCTCTtaacttttaactaaaaaagctaagaaccggttcttaaaactcttatttaagaaccggtttttagctttttagttaaaaattaagagacgggttcttatattccgtcaagaaccc	.........((((((((((((......))))..((((((((((.((((((((((((((.((((((((.(((((((((((((((((((((((((.......))))))))))))))))))))))))))))))))).)))))))))))))).))))))))))..))))))))	33.1	-87.1	1.6
TAATTTAAAGTCGTCCGGGGAAAG	PC-5p-149	24	5'	15	9	12	11	chrC07	+	42998329	42998519	aatttaactttaaccagacgacttaatataaagtcgtccctccagaagactTAATTTAAAGTCGTCCGGGGAAAGcaaagtcgtccagaatttttcccaattttctggtcaaaccttgcTTATCCCGGACGACCTTAAATtaagtcgtttagctggacgactttcatctaagtcgtctggagaaagttaaa	..(((((((((..((((((((((((....((((((((((........((((((((((((.((((((((((..((((((.((...((((((..((....))..))))))....)).))))))..)))))))))).))))))))))))........))))))))))....))))))))))))..)))))))))	39.3	-96.1	1.3
AGGCTGGGGTTCTTATCGTAATAT	PC-5p-150	24	5'	26	22	20	27	chrC05	+	30695803	30695972	agattcctgctacactgaatgaaagcacgtttattgcaggtcttttAGGCTGGGGTTCTTATCGTAATATaagatacggtctcttagcttttaactaaaaaaattaaaagactgtatcttATATTACGATAAAAACTCTAACCTaagaaacctgtaatatacatgctccg	.......................((((.((.((((((((((.(((((((.(((((((.((((((((((((((((((((((((.(((..((((......))))..))).)))))))))))))))))))))))).))))))).))))))).)))))))))).)).))))...	33.5	-73.3	1.3
AGATCGTCTGATACTAATGGG	PC-5p-151	21	5'	15	22	12	27	chrCnn_random	+	33329005	33329132	tcagAGATCGTCTGATACTAATGGGtcattttttgtaattggtaaatcttaactaaacattttacacgcttgagagactctttctcttgcaaaaaatgATCCATTAGTATCAGACGATCtcaaagacg	...((((((((((((((((((((((((((((((((((.(((((........)))))...............((((((...)))))).)))))))))))))))))))))))))))))))))).......	34.4	-60.6	1.4
AATAATTGTCGGGTCCACAAT	PC-5p-152	21	5'	13	7	10	9	chrC08	+	15501270	15501429	tatatattatatatgcgtaAATAATTGTCGGGTCCACAATtattgtggaacctcataaataagggttcttaaagattcttaaaaccctcttttaaaaatctttatctatgaagttccacaaaaattgtggaccccacaattacttatacatatgtaatat	...((((((((((((..(((.(((((((.((((((((((((.(((((((((.(((((.(((((((((.(((((((............)).))))).))))))))).))))).))))))))).)))))))))))).))))))).)))..))))))))))))	28.1	-70.5	1.6
GTTAAGAACTCTAGTTAAGAAACT	PC-5p-153	24	5'	15	2	11	2	chrC06	+	29712108	29712183	ggGTTAAGAACTCTAGTTAAGAAACTcttatttttagcggttcaatgggagtttcttaattaggagttcttaaaaa	...((((((((((((((((((((((((..(((...........)))..))))))))))))))).)))))))))...	31.6	-30.9	1.3
AACGGAATATAAGAATCTGTATCT	PC-5p-154	24	5'	14	2	11	2	chrC07	+	26123519	26123676	agagtggggttcttAACGGAATATAAGAATCTGTATCTtaacttttaactaaaaaaattaagaaccagctcttaaaactcttatttaagaaccggttcttagcttttttagttaaaaattaagagacgggttcttatatttcgttaaaaactctaccc	...((((((((.((((((((((((((((((((((.((((((.((((((((((((((..((((((((...(((((((.......)))))))...))))))))..)))))))))))))).)))))).)))))))))))))))))))))).))))))))..	29.7	-73.7	1.6
AGCGGAATATGAGAATCCTCTTAA	PC-5p-155	24	5'	28	4	21	4	chrA02	+	670831	671000	tggagggttcttgagatgtggttcttAGCGGAATATGAGAATCCTCTTAActtttaactaaaaaaatgtaagaaccggttcttaaataagagttttaagagatggttcttaatttttttagttaaaaattaagaaacgagttctaatattccggtaaaaacctcacccta	...(((((.........(.((((.(((.((((((((.((((((.((((((.((((((((((((((((.(((((((((..(((((((.......)))))))..))))))))))))))))))))))))).))))))...)).)))).)))))))).))).)))).)))))).	31.2	-63.2	1.2
AATCATGGTTAAGGAACT	PC-5p-156	18	5'	26	12	20	15	chrA03	-	7438142	7438220	ctaAATCATGGTTAAGAAACTaacaattgtctaaaatggtattgtttagacaatagttagcttcttaaccatgattatt	...(((((((((((((((.(((((.((((((((((.........)))))))))).))))).)))))))))))))))...	26.6	-36.3	1.7
[1]Name	New discovered 5p or 3p sequences are annotated as PC-5p or PC-3p (PC, predicted candidate)
[2]pre-miRNA	pre-miRNA sequences from B. napus genome
[3]SS	Secondary structure
[4]MFEI	Minimal folding energy indexes (MFEI) = -dG*100/pre-miRNA length/CG%
