# Supplementary material for: Identification of miRNAs and their targets in transgenic Brassica napus and its acceptor (Westar) by high-throughput sequencing and degradome analysis
Source: Royal Society of Chemistry journal article supplement (doi:10.1039/c5ra14672k), 2015-01-01
Supplement: c5ra14672k7.xlsx [file c5ra14672k7.xlsx]

## Sheet: Sheet1
Additional file 6: Table S6 - Data comparison of novel miRNAs in the WA and TG libraries
Name[1]	Sequence	WA Norm	TG Norm	Log2 Ratio[2]
PC-3p-1	TACGTTTAAGTCGTCCAGGGTC	20	22	-0.14
PC-3p-2	AGACTCAGACTCAGCCGCAGCCGC	23	18	0.35
PC-3p-3	GTTTAGAACTCCGCAATTACATA	13	5	1.38
PC-3p-4	AACCACGTCATAAGAACCCCGAGT	17	16	0.09
PC-3p-5	TTGTAGAATTTTGGGAAGGGC	52	33	0.66
PC-3p-6	TGAGATATGAAGTTGAGTTGGAAC	19	2	3.25**
PC-3p-7	AATTCCGTTGGAAAATCCTGA	10	4	1.32
PC-3p-8	AGAGTGAACCATTTGAACAAATCT	11	4	1.46
PC-3p-9	GCTTTCCCCGGACGACTTTAAATT	183	473	-1.37**
PC-3p-10	TTCCGCTAAGAACTCCACCTTAAT	13	20	-0.62
PC-3p-11	AATTTCCGCTAAGAACCTCATCCT	33	12	1.46**
PC-3p-12	AATACCTGCGGATGTCCGGATCCG	15	9	0.74
PC-3p-13	GAGATATGAAGTTGGGTTGAAAC	21	5	2.07**
PC-3p-14	ATTAAGGACCCAAGACCAAGGACC	25	32	-0.36
PC-3p-15	TATCCCGGACGACCTTAAATT	209	237	-0.18
PC-3p-16	AACTTCCGCTAAGAACCACATCCT	47	40	0.23
PC-3p-17	GAGATATGAAGTTGGGTTT	14	0	-
PC-3p-18	ATCAGAGATTTCGGCCGTAAATTC	15	2	2.91**
PC-3p-19	ATTTTCCGAGGAACTCCATTCCCT	11	12	-0.13
PC-3p-20	ATTCCGACAAGAACTCCGCCCT	102	212	-1.06**
PC-3p-21	ATATTCCGCTAAGAACTTCATTCT	12	5	1.26
PC-3p-22	TTATCCCGGACGACCTTAAAT	34	36	-0.08
PC-3p-23	CGCTAAGAACTCCATCATAAGAAT	26	20	0.38
PC-3p-24	ATATTCCCCTAAAAACTCCACCCT	9	21	-1.22**
PC-3p-25	ATTAAGGACCTAAGCACAAGGACT	12	17	-0.5
PC-3p-26	GTCTTAGAACTCCGGGTTAATCA	10	12	-0.26
PC-3p-27	AAGGACCCCCAATAATCATGCCCT	5	11	-1.14
PC-3p-28	AATTCCGTTGGAAAATCCTGACA	14	1	3.81**
PC-3p-29	ATATTCTGCTAAGAACTCTACCCT	10	2	2.32**
PC-3p-30	AGGGTGAGGTCGGGGGTTCGAATC	18	23	-0.35
PC-3p-31	ATTCCGTTAAGAACTCCACCTTA	49	74	-0.59
PC-3p-32	ATATTCTCCTAAGAATTCTGCCCT	58	52	0.16
PC-3p-33	ATATAAGAGCCGTCTGTTAGCTGA	6	12	-1
PC-3p-34	AGAGAATTTGCCAAAGGACAAACT	10	9	0.15
PC-3p-35	GTTGACTCTGAGAATACCCGGAAA	63	27	1.22**
PC-3p-36	TGAAATACATGCAGATCTCCCGCT	13	11	0.24
PC-3p-37	ACACTTTTCGGCTAAGAGACGACT	43	36	0.26
PC-3p-38	ACGAAGCATAGAACAGATCTTTCT	10	14	-0.49
PC-3p-39	CGGGCCCCTTAGGATACTACTGA	27	54	-1.00**
PC-3p-40	ACTTTTCGGCTAAGAGACGACTCT	11	7	0.65
PC-3p-41	AGACTACTAGATTTTGACCCGTGC	12	2	2.58**
PC-3p-42	GCGGACCTAGACTCACAGCCCTGC	1	11	-3.46**
PC-3p-43	TGTATTTCCTCGGAATTGCCT	12	4	1.58
PC-3p-44	AAAAACGACGTCGTCTTATCTTGT	13	4	1.7
PC-3p-45	AGAGTGAGATATAAAGTTGGGTT	19	2	3.25**
PC-3p-46	ACTTCACCCTAAGAACTCTCCAT	6	10	-0.74
PC-3p-47	AAAGATTGTTGTGGTCTTGTGCCT	153	169	-0.14
PC-3p-48	AATTTCTGCTAAGAACTTCACTCT	10	5	1
PC-3p-49	TAGAACTCCGCATTTACATACGCA	12	9	0.42
PC-3p-50	AACTTCTGCTAAGAACCATATCCT	16	15	0.09
PC-3p-51	TTTGTTCACAATTGCATAGTC	7	16	-1.19
PC-3p-52	ATATTCCGCTAAGAACTTCACTCT	33	35	-0.08
PC-3p-53	ATCCATTAGTATCAGACGATC	156	164	-0.07
PC-3p-54	GAGATATGAAATTGGATTGGAGCA	26	4	2.70**
PC-3p-55	AAGGGCTTCCAACTTAAAACCAAT	29	32	-0.14
PC-3p-56	AAGGACCTCTTGCGATAATCATGG	56	15	1.90**
PC-3p-57	ATAAGAACTGTCTCTTAACCGAAA	22	7	1.65**
PC-3p-58	AGAGTCGGGGTCTTATATTCTGCT	18	11	0.71
PC-3p-59	ATTAAGGACCCAAGAGTAAGGACC	15	8	0.91
PC-3p-60	AGCGAGATATGAAGTTAGGTTGGA	24	6	2.00**
PC-3p-61	GGTTTCCCGTAAAGCTTAGAACT	14	16	-0.19
PC-3p-62	AAAAATAGAGTGCCTTTGGAGATG	14	2	2.81**
PC-3p-63	CTTTCCCCGGACGACTTTAAA	4	10	-1.32
PC-3p-64	ATATTCTGCTAAGAACTTCACCCT	36	18	1.00**
PC-3p-65	AAGAATTCTGTCCTAAGAAAACCT	12	1	3.58**
PC-3p-66	ATATTCTGTTAAGAACCCCACCCT	30	25	0.26
PC-3p-67	GCTTATCCCGGACGACCTTAAATT	18	14	0.36
PC-3p-68	TGACGCGTAGCGCCTAGGCGGCC	12	14	-0.22
PC-3p-69	GGAGTGAGATATGAAGTTGGGTTT	22	0	-
PC-3p-70	GAGATATGGAGTTGGGTTTGAGC	17	0	-
PC-3p-71	AACTTCCACTAAGAACCCTACTCT	7	16	-1.19
PC-3p-72	AGAGTCGGGTTCTTATATTCTGCT	288	131	1.14**
PC-3p-73	TGACAGCTTGTCCTGTGGGAATGC	13	31	-1.25**
PC-3p-74	AGAGACGGATTCTTATATTCTGCT	21	17	0.3
PC-3p-75	ATATTCTTCTAAGAACTCCGTCCT	35	34	0.04
PC-3p-76	GATGACGGTATTTCTCCTACGTAG	6	22	-1.87**
PC-3p-77	ATATTCTGATAAAAAACTCCACCT	11	17	-0.63
PC-3p-78	AACTTCTGCTAAGAACTTCATCCT	33	10	1.72**
PC-3p-79	AGAAGACGGACGAGATGAATACAT	22	6	1.87**
PC-3p-80	GCTTTCCCCGGACGACTTTAAAT	17	47	-1.47**
PC-3p-81	TATATCCCGCTAAGAACCCTACCT	2	10	-2.32**
PC-3p-82	AACTTTCGCTAAAAACTCTATCCT	27	19	0.51
PC-3p-83	AGAGTGAACCATTAGAGCAAATC	13	0	-
PC-3p-84	GTTGAGGGTTTATTTCACTGGATT	18	4	2.17**
PC-3p-85	GAGATATGGAGTTGGGTTGAAGCA	57	10	2.51**
PC-3p-86	AGAGTGAAATATGAAGTTGGGTT	12	1	3.58**
PC-3p-87	TTTATCCAAGGGTTCAGGCTT	9	12	-0.42
PC-3p-88	ATATTCCGTTAAGAACTCCACCCT	215	360	-0.74
PC-3p-89	CTTTCCCCGGACGACTTTAAATT	15	24	-0.68
PC-3p-90	TGCTTATCCCGGACGACCTTAAAT	46	42	0.13
PC-3p-91	AGAGTAAACTATTGGACCAAAACT	11	2	2.46**
PC-3p-92	ATATTCTGGTAAGAACCTCACCCT	28	31	-0.15
PC-3p-93	TGTTCTGTTTCAAATATATCTGAG	38	32	0.25
PC-3p-94	ACCGACGCATTTCCGACGAACCCT	9	14	-0.64
PC-3p-95	GATTAGTCGTTGGGCCTAGAAAGC	55	29	0.92
PC-3p-96	CTTATCCCGGACGACCTTAAAA	3	14	-2.22**
PC-3p-97	ATATTTCCCTGAGAACTCCGCCCT	14	55	-1.97**
PC-3p-98	TATCCCGGACGACCTTAAAT	13	14	-0.11
PC-3p-99	ATTCTAAGAACTCCGGGTTAATCA	25	19	0.4
PC-3p-100	AGGAGCAGAACCAAGTTAGTC	18	15	0.26
PC-3p-101	TGCTTTCCCCGGACGACTTTAAAT	46	114	-1.31**
PC-3p-102	ACTAAGTCGTCTAATTGGAAGACT	9	22	-1.29**
PC-3p-103	ATATTCCGCTAAGAACTTCATCCT	17	14	0.28
PC-3p-104	AAAGGGACTCTACGCTAAGGGCCT	36	30	0.26
PC-3p-105	AACTTCCGCTAAGAACTCCACCCT	53	79	-0.58
PC-3p-106	CATCGATGACTGGAGTTCTCC	1	12	-3.58**
PC-3p-107	CTTATCCCGGACGACCTTAAAT	15	17	-0.18
PC-3p-108	TACAGTTGCAATGCTTGTGGGTCT	5	13	-1.38
PC-3p-109	GCAGTGAGATATGAAGTTGGGTT	17	2	3.09**
PC-3p-110	ATATTCCGTTAATAACTCCACCCT	10	24	-1.26**
PC-3p-111	AAGAGACACAATCTAAGAGACCTG	21	1	4.39**
PC-3p-112	AGTAGGGTTGGAGTAATTTTACTC	29	12	1.27**
PC-3p-113	TGAACGTAGTTGTACTTGGACTA	7	14	-1
PC-3p-114	ACTCCACTCTAAGAACTCCGGGTT	31	36	-0.22
PC-3p-115	ATATTCCCTTAAAAACTCTGCCCT	22	47	-1.10**
PC-3p-116	AACTCTACTCTAAGAACCCCGGGT	22	33	-0.58
PC-3p-117	GATACCAACTGATGAGCAGAAACT	19	5	1.93
PC-3p-118	TTCCCCGGACGACTTTAAATTAAG	15	29	-0.95
PC-3p-119	TAACTTCTGCTAAGAACTCATCCT	24	13	0.88
PC-3p-120	AACTTCTGCTAAGAACCTCACTCT	17	22	-0.37
PC-3p-121	AACGGAATTAAAATTGAGGATTTC	19	5	1.93
PC-3p-122	AACTTCTACTAAGAACTCCACTCT	22	43	-0.97
PC-3p-123	AGAAATTCTTTGTTAGACTTGGAC	12	11	0.13
PC-3p-124	AGAGACTGTATTTTATATTAC	20	11	0.86
PC-3p-125	CGCTGCAGCGCTGTGAACCT	18	12	0.58
PC-3p-126	GAAGAATTCATTTTCCGTCGGAAC	10	2	2.32**
PC-3p-127	ATATTACGATAAAAACTCTAACCT	7	17	-1.28
PC-3p-128	AACTTCCGCTAAGAACTCCATCCT	73	125	-0.78
PC-3p-129	GAAATGGAGTAGGGTTGGAAC	12	2	2.58**
PC-3p-130	CTAAGAACCCCACCCTAAGAACCT	1	11	-3.46**
PC-3p-131	AATAGTTGGATTCTGATTCGGGCT	41	26	0.66
PC-3p-132	GAGATATGAAGTTGGGTTGAAACA	43	5	3.10**
PC-3p-133	GGTCATGTCTGACAGCTTCACT	101	66	0.61
PC-3p-134	AAAGAGAATTTGCCAAAGGACAAA	19	5	1.93**
PC-3p-135	TGACAACCCGTCCCATGGACC	2	16	-3.00**
PC-3p-136	ATATTCCGTTAAGAACTTCGCCCT	15	8	0.91
PC-3p-137	TTTCCCCGGACGACTTTAAATTA	7	11	-0.65
PC-3p-138	TAAGAACCCACATTAATCATG	53	105	-0.99
PC-3p-139	GATTGATGCTTGGGATTTATTT	18	10	0.85
PC-3p-140	TGAGGTCCTGGGTTCGAGACTT	17	12	0.5
PC-3p-141	AGAGACTGTATCTTATATTACGCT	87	37	1.23**
PC-3p-142	GAAATGGAGTAGGATTGGAGC	10	4	1.32
PC-3p-143	AAGGACCCAAGAGCAAGGACCACC	19	8	1.25
PC-3p-144	GCAAGTCGTCCTTGGCTATT	19	6	1.66
PC-3p-145	TTTCCCCGGACGACTTTAAAT	34	75	-1.14**
PC-3p-146	AATGGTCAAGATTGTTTCATCTCT	8	11	-0.46
PC-3p-147	TTCAGATGGATCATCCGGATGACT	14	7	1
PC-3p-148	ACTCTAAGAACTCCGGATTAATCA	7	11	-0.65
PC-3p-149	GAGATTTGAAGTTGGGTTGGAGCA	12	6	1
PC-5p-1	AGCGAACTATAAGAACCTGTCTCT	16	14	0.19
PC-5p-2	AGGATGAGGTTGTTAGCGGAAGTT	18	5	1.85
PC-5p-3	AGCGGAATTTAAGAAATCATCTCT	12	4	1.58
PC-5p-4	AAACCGTCTGTTAACTTTTAACTA	12	12	0
PC-5p-5	AGCGGATGTTAAGAAACAGTTTCT	17	9	0.92
PC-5p-6	AGGATGAGGTTCTTATCGGAAGTT	21	7	1.58**
PC-5p-7	AGCGGAATATAAGAAATCGTCTCT	75	48	0.64
PC-5p-8	TGAGTCGTCTGAATTGTTGGA	15	0	-
PC-5p-9	GAATTTGCTCCAATGGTTCACTGT	12	1	3.58**
PC-5p-10	AGCGGAATATAAGAATTTATCTCT	15	21	-0.49
PC-5p-11	AGCGGATGTCAAGAAACTGTTTCT	35	15	1.22**
PC-5p-12	AGCGGAATATAAGAATTCGTTTCT	19	25	-0.4
PC-5p-13	ATGATTATCGGAGGGTTCTTAAGT	24	18	0.42
PC-5p-14	TAAACCCTGAAGCCTCGGATA	17	15	0.18
PC-5p-15	ATAATTGTCGGGTCCACAATT	2	11	-2.46**
PC-5p-16	GAGGAAATCCAAGAGAGAGAGACA	31	11	1.49**
PC-5p-17	AGGGTCGGTGTCCTGCAGAGCTGT	7	14	-1
PC-5p-18	AGTGGGAAATGGAGTGATGAACA	15	1	3.91**
PC-5p-19	ACCGGAATATAAGAATCTGTCTCT	13	9	0.53
PC-5p-20	AGCGGATATAAGAGACGTCTCTTA	21	22	-0.07
PC-5p-21	TGAACCCAAGATCTCACCCTT	333	377	-0.18
PC-5p-22	ATCCTGATCTGGATTCGGTCCTTC	11	5	1.14
PC-5p-23	AGCGGAATATAAGAACCTGACTCT	238	130	0.87
PC-5p-24	GCTCCAATGGTACTCTATTTCTC	12	9	0.42
PC-5p-25	ATCTGCATTAGTGAACTCCATGGG	61	37	0.72
PC-5p-26	AAAACCCTGAACCCTTGGATAAAC	9	21	-1.22**
PC-5p-27	GAGTGGAAAATGGAGTGATGAACA	19	1	4.25**
PC-5p-28	AAAGCCTGAACCCTTGGATAAATC	35	11	1.67**
PC-5p-29	AAACCCTGAACCCTTGGATAAACT	10	5	1
PC-5p-30	AGTATCCGTCGGAATTTCCTCAGA	12	1	3.58**
PC-5p-31	AACGGCATATAAGAACCTGACTCT	21	13	0.69
PC-5p-32	TTAATTTAAGGTCGTCCGGGA	25	44	-0.82
PC-5p-33	AGCGGAATATAAGAAATTGTCTCT	27	13	1.05**
PC-5p-34	AATTTAAAGTCGTCCGGGGAAAGC	25	30	-0.26
PC-5p-35	ACTCGAACCCAAGACCTCACCCTT	30	55	-0.87
PC-5p-36	GTTTTCGTTCTTGTGTGAAGC	16	2	3.00**
PC-5p-37	AGCAGAATATAAGAACCTGACTCT	40	29	0.46
PC-5p-38	GGAGTGAGAAATGGAGTGATGAAC	84	7	3.58**
PC-5p-39	GATTCGAACCCCCGACCTCACCCT	20	45	-1.17**
PC-5p-40	AAACCGAACTGAACTGAACCGTT	5	12	-1.26
PC-5p-41	GAGAAAATCGACTGTGAGGAGAGA	31	14	1.15**
PC-5p-42	GAGAAAGTGAATCATCGGAAGATT	11	1	3.46**
PC-5p-43	GGAGTGGGAAATGAAGTGATGAAC	10	0	-
PC-5p-44	TACTCGAACCCAAGATCTCACCTT	9	11	-0.29
PC-5p-45	GCCGGAAGTTAAGAAACTGTTTTT	10	6	0.74
PC-5p-46	ACCGGAATATAAGATCTCGTCTCT	79	39	1.02**
PC-5p-47	ATAAGATGGATGAGCCACTCCACT	46	19	1.28**
PC-5p-48	AGTCTCGAACTCAGGACCTCACCC	9	17	-0.92
PC-5p-49	AAAGTGAGGTTCTTATCGGAAGTT	98	11	3.16**
PC-5p-50	ATCGGAATATAAGAACTCGTCTCT	353	180	0.97
PC-5p-51	ATCGGAATATAAGAATCTGTCTCT	22	15	0.55
PC-5p-52	AGTGTAGAACCTCTACCCAAAAGT	19	8	1.25
PC-5p-53	AGCGGAATATAAGAACTCGGCTCT	13	10	0.38
PC-5p-54	TTGACCCTGGACGACTTAAAC	73	60	0.28
PC-5p-55	AGATACGGTCTCTTAACTTTTAGC	43	24	0.84
PC-5p-56	ATGGACTAAGAAATGCTCCAACCT	37	9	2.04**
PC-5p-57	GAGTGAGAAATGGAGTAATGAACT	22	1	4.46**
PC-5p-58	ATGATTAACCCGGGTTCTTAGGAT	9	22	-1.29**
PC-5p-59	AGCGGAATATAAGAACTCGTCTTT	16	5	1.68
PC-5p-60	ACTTAATTTAAGGTCGTCCGGGAT	21	24	-0.19
PC-5p-61	GAATCCGACTCTTAACTTTTAACT	44	24	0.87
PC-5p-62	GATTAACCCGGAGTTCTTAGATTG	11	5	1.14
PC-5p-63	ACCCTTGGATAAACCCTGAAGCCT	12	19	-0.66
PC-5p-64	AGCCGGACGACTTAGAATTAAGTC	35	12	1.54**
PC-5p-65	GACCCACAAGCATTGCAACTG	34	74	-1.12**
PC-5p-66	GCCTGAACCCTTGGATAAATC	84	35	1.26**
PC-5p-67	AGCAGAATATAAGAACCCGGCTCT	28	53	-0.92
PC-5p-68	AAACACTAAACTCTAAACCATTGG	13	6	1.12
PC-5p-69	AACGGAATATAAGAACCAGTCTCT	21	17	0.3
PC-5p-70	GTTCCAATGGTGTTACTGTATAAT	10	9	0.15
PC-5p-71	AATATAAGATACGGTCTCTTAGCT	21	18	0.22
PC-5p-72	AAGTCAACCCGCTGGTCAAAGATT	15	11	0.45
PC-5p-73	ATCGGAATATAAGAACCTGACTCT	51	40	0.35
PC-5p-74	GACTTAATTTAAGGTCGTCCGGGA	18	18	0
PC-5p-75	AGCGAAATATAAGAATCTGACTCT	22	25	-0.18
PC-5p-76	TAATTTAAGGTCGTCCGGGAT	15	19	-0.34
PC-5p-77	GGGGGTTTTTAGGATGAAGTTCTT	16	0	-
PC-5p-78	TTTAAGGTCGTCCGGGATAAGCAA	16	33	-1.04**
PC-5p-79	GTTATCATTACTGTCGACCAGGAG	8	11	-0.46
PC-5p-80	AGTAGGATTCTTAGCGGAGTATA	15	11	0.45
PC-5p-81	AAAACCCTGAACCCTTGGATAAAT	17	11	0.63
PC-5p-82	ATACTGTTGAAACAGGAGGACACC	10	11	-0.14
PC-5p-83	AGCGGAATATAAGAATCTCTCT	10	3	1.74
PC-5p-84	AGGGTAGGGTTCTTAGCAGAATA	13	1	3.70**
PC-5p-85	GTAGAGAACTCCCTTTGAAAAACT	17	8	1.09
PC-5p-86	AGCGGAATATAAGGAACCATCTCT	32	14	1.19**
PC-5p-87	ATTTAAAGTCGTCCGGGGAAAGC	4	11	-1.46
PC-5p-88	AATTAAGTCGTCTGCAAAGGA	15	86	-2.52**
PC-5p-89	AGATACGGTCTCTTAGTTTTGAAC	18	9	1
PC-5p-90	ACTATCCGGATCTGGATTCGGCCT	18	12	0.58
PC-5p-91	GAGTGGGAAATGGAGTAATGAACA	25	3	3.06**
PC-5p-92	ATCGGAATATAAGAAACTGTCTCT	173	97	0.83
PC-5p-93	TAATTTAAAGTCGTCCGGGGAAA	13	11	0.24
PC-5p-94	AACGGAATATAAGAATTTGACTCT	200	122	0.71
PC-5p-95	GTAGGGTCCCTTAACTTTTAACA	12	14	-0.22
PC-5p-96	AACCGTCTGTTAACTTTTAACTA	45	31	0.54
PC-5p-97	TTAATTTAAGGTCGTCCGGGATA	15	14	0.1
PC-5p-98	ACCGGAATATAAGAAACTGTCTCT	75	20	1.91**
PC-5p-99	GTTTTTAGCGGAATATAAGAACCT	13	4	1.7
PC-5p-100	GTTCCGACGGAAAATGAATTCCTC	20	7	1.51**
PC-5p-101	AGTATGCAAGTGTGAGGACCATT	18	0	-
PC-5p-102	AGCGGAATATAAGAATTTGTCTCT	137	79	0.79
PC-5p-103	AATTAGATAAGTCACAGACCT	23	14	0.72
PC-5p-104	CGGAATATAAGAACCTGTTTCTT	18	16	0.17
PC-5p-105	AAACTCAGGATGGACAGCGCC	17	20	-0.23
PC-5p-106	TAACGGAATATAAGAACTCGACT	31	22	0.49
PC-5p-107	CGACCTCACCCTTTAACAGCC	14	29	-1.05**
PC-5p-108	GAGTGGGAAATGGAGTGATGAACA	31	5	2.63**
PC-5p-109	GAGTTTTGTGATTGTGCGAGAGTT	3	11	-1.87
PC-5p-110	GTTTTGAGAGATTGGGAAGCT	225	69	1.71**
PC-5p-111	ATATACCGACGGAACTGTTCCCTC	19	19	0
PC-5p-112	AGAATGAGGTTCTTATCGGAAGTT	11	6	0.87
PC-5p-113	TATAATTCAGTCGTCCGCCCG	11	9	0.29
PC-5p-114	GGGTATTCTAAGAATCAACGGATT	11	8	0.46
PC-5p-115	AGAGTGGGATTCTTAGCGGAAGTT	24	5	2.26**
PC-5p-116	ACCGGAATATAAGAACTCGTCTCT	121	72	0.75
PC-5p-117	CGGGTATTTACGGAAAAGTCAACC	13	15	-0.21
PC-5p-118	AGCGGAATATAAGAACTTGTTTCT	47	35	0.43
PC-5p-119	AAACCGAACTGAACTGAACCGTTC	22	6	1.87**
PC-5p-120	AATGTAGAAACCCTCAAACTAAAG	12	11	0.13
PC-5p-121	AGGAATTAGAATGAAGAAGCTATC	20	5	2.00**
PC-5p-122	GATTAACCCGGGGTTCTTAGGATG	53	53	0
PC-5p-123	AGCGGAATATAAGAACTTGTTTC	33	18	0.87
PC-5p-124	AACTGTAAACCCTAAATCCAAACC	11	12	-0.13
PC-5p-125	AATCTGGACGACTTATCTGTAAGT	12	10	0.26
PC-5p-126	AATTTAAGGTCGTCCGGGATAAGC	74	72	0.04
PC-5p-127	AGCGGAAAATAAGAACTCGTGTCT	139	93	0.58
PC-5p-128	TGAAAAGTCTTCCAAATGGAC	12	5	1.26
PC-5p-129	AATAGGAACCCCTGAACCCAAACC	8	14	-0.81
PC-5p-130	GAATTACGGCTGTGTAGAGCACTC	81	60	0.43
PC-5p-131	GAGCGAGAAATGGAGCGATGAACA	31	15	1.05**
PC-5p-132	GGGTCCTTAATCGTAGGGTC	13	7	0.89
PC-5p-133	AGCGGAATATAAAAACTTGTCTCT	12	10	0.26
PC-5p-134	AGACTTTATATGGGCTTTGAGACT	38	9	2.08**
PC-5p-135	GTTCCGACGGAAAATGAATTCTT	11	3	1.87
PC-5p-136	AGCGGAATATAAGAATTCGTCTCT	99	53	0.9
PC-5p-137	GAGTGAGAAATGGAGTGATGAACA	339	51	2.73**
PC-5p-138	AGCGGAATATAAGAACTCGACTCT	121	64	0.92
PC-5p-139	ATATTCCGACGAATTCTGGGCGTC	14	14	0
PC-5p-140	CGAGAAGTTGGAGGATTGCAAACT	16	2	3.00**
PC-5p-141	GATACGGTCTCTTAGCTTTTAACT	48	25	0.94
PC-5p-142	AATAACACAATCTTATTGGTCGGT	13	11	0.24
PC-5p-143	GTAGGGTCTCTTAACTTTTAACT	29	16	0.86
PC-5p-144	AGCGGAATATAAGAACCTGCCTCT	8	10	-0.32
PC-5p-145	GTAAGAACCTCATCTTAAGAACCT	16	25	-0.64
PC-5p-146	AACGGAATATAAGAACTCGTCTC	11	7	0.65
PC-5p-147	ATTCAACCCCTTAACTCTAAACCT	5	25	-2.32**
PC-5p-148	ACCGGAATATAAAAACTTGTCTCT	33	30	0.14
PC-5p-149	TAATTTAAAGTCGTCCGGGGAAAG	12	11	0.13
PC-5p-150	AGGCTGGGGTTCTTATCGTAATAT	20	27	-0.43
PC-5p-151	AGATCGTCTGATACTAATGGG	12	27	-1.17**
PC-5p-152	AATAATTGTCGGGTCCACAAT	10	9	0.15
PC-5p-153	GTTAAGAACTCTAGTTAAGAAACT	11	2	2.46**
PC-5p-154	AACGGAATATAAGAATCTGTATCT	11	2	2.46**
PC-5p-155	AGCGGAATATGAGAATCCTCTTAA	21	4	2.39**
PC-5p-156	AATCATGGTTAAGGAACT	20	15	0.42
[1]Name	Name regulation following Additional file 5: Table S5; red marked miRNAs were detected in degradome analysis.
[2]Log2 Ratio	Log2 (WA Norm/TG Norm); ** indicates highly significant variation (p-value < 0.01 in both Chi-square 2×2 & Fisher-exact test and |log2(WA/TG)|≥1) between the WA and TG libraries.
