# Supplementary material for: Identification of miRNAs and their targets in transgenic Brassica napus and its acceptor (Westar) by high-throughput sequencing and degradome analysis
Source: Royal Society of Chemistry journal article supplement (doi:10.1039/c5ra14672k), 2015-01-01
Supplement: c5ra14672k8.xlsx [file c5ra14672k8.xlsx]

## Sheet: Sheet1
Additional file 7: Table S7 - Overview of degradome sequences in the WA and TG degradome libraries
Type		WA	TG
Raw reads	Total	31003060	24766218
	Unique	9657446	7318668
ADTs & Length[1]	Total	133889	94146
	Unique	52133	39027
Input cDNA[2]		101040	101040
Mapped-cDNA reads	Total	23597707	18863658
	Unique	6891809	5351033
Coverd cDNA		76541	73225
[1]ADTs & Length: adapters data and lengths <15 nt
[2]Input cDNA: B. napus cDNA library; http://www.genoscope.cns.fr/brassicanapus
