# Supplementary material for: Identification of miRNAs and their targets in transgenic Brassica napus and its acceptor (Westar) by high-throughput sequencing and degradome analysis
Source: Royal Society of Chemistry journal article supplement (doi:10.1039/c5ra14672k), 2015-01-01
Supplement: c5ra14672k9.xlsx [file c5ra14672k9.xlsx]

## Sheet: S8.1
Additional file 8: Table S8.1 - Targets of identified conserved unique miRNA sequences in the WA and TG degradome libraries
miRNA Family	miRNA Groups	Name[1]	Sequence	Transcript ID	Gene annotation	Symbol[2]	GO[3]	KEGG[4]	Score[5]	Range[6]	Site[7]	WA Category[8]	TG Category[8]	WA TPB[9]	TG TPB[9]
miR156	Con-BN	bna-miR156b,c,g	TTGACAGAAGATAGAGAGCAC	BnaA02g14580D	Squamosa promoter-binding-like protein 6	SPL6	GO:0005634(nucleus);GO:0003677(DNA binding);GO:0046872(metal ion binding);GO:0006355(regulation of transcription, DNA-dependent);GO:0006351(transcription, DNA-dependent)	-	2.5	1072-1092	1083	4	-	11	0
				BnaA02g17670D	12-oxophytodienoate reductase 1	OPR1	GO:0005829(cytosol);GO:0016629(12-oxophytodienoate reductase activity);GO:0010181(FMN binding);GO:0031408(oxylipin biosynthetic process);GO:0046686(response to cadmium ion);GO:0009751(response to salicylic acid stimulus);GO:0009611(response to wounding)	ko00592(alpha-Linolenic acid metabolism)	4	716-735	726	2	-	32	0
				BnaA04g27550D	Squamosa promoter-binding-like protein 15	SPL15	GO:0005634(nucleus);GO:0003677(DNA binding);GO:0046872(metal ion binding);GO:0042127(regulation of cell proliferation);GO:0008361(regulation of cell size);GO:0006355(regulation of transcription, DNA-dependent);GO:0006351(transcription, DNA-dependent);GO:0010228(vegetative to reproductive phase transition of meristem)	-	2	886-906	897	4	-	32	0
				BnaA07g08830D	Squamosa promoter-binding-like protein 10	SPL10	GO:0005634(nucleus);GO:0003677(DNA binding);GO:0046872(metal ion binding);GO:0010358(leaf shaping);GO:0045893(positive regulation of transcription, DNA-dependent);GO:0048510(regulation of timing of transition from vegetative to reproductive phase);GO:0006351(transcription, DNA-dependent)	-	2	1621-1641	1632	2	0	30	50
				BnaA07g08840D	Squamosa promoter-binding-like protein 10	SPL10	GO:0005634(nucleus);GO:0003677(DNA binding);GO:0046872(metal ion binding);GO:0010358(leaf shaping);GO:0045893(positive regulation of transcription, DNA-dependent);GO:0048510(regulation of timing of transition from vegetative to reproductive phase);GO:0006351(transcription, DNA-dependent)	-	2	2287-2307	2298	4	2	32	162
				BnaA07g17550D	Squamosa promoter-binding-like protein 15	SPL15	GO:0005634(nucleus);GO:0003677(DNA binding);GO:0046872(metal ion binding);GO:0042127(regulation of cell proliferation);GO:0008361(regulation of cell size);GO:0006355(regulation of transcription, DNA-dependent);GO:0006351(transcription, DNA-dependent);GO:0010228(vegetative to reproductive phase transition of meristem)	-	2	864-884	875	4	4	16	20
				BnaA09g16340D	Squamosa promoter-binding-like protein 2	SPL2	GO:0005634(nucleus);GO:0003677(DNA binding);GO:0046872(metal ion binding);GO:0048510(regulation of timing of transition from vegetative to reproductive phase);GO:0006355(regulation of transcription, DNA-dependent);GO:0006351(transcription, DNA-dependent)	-	2	2039-2059	2050	-	2	0	40
				BnaA09g27960D	Squamosa promoter-binding-like protein 10	SPL10	GO:0005634(nucleus);GO:0003677(DNA binding);GO:0046872(metal ion binding);GO:0010358(leaf shaping);GO:0045893(positive regulation of transcription, DNA-dependent);GO:0048510(regulation of timing of transition from vegetative to reproductive phase);GO:0006351(transcription, DNA-dependent)	-	2.5	1528-1548	1539	4	-	16	0
				BnaAnng25050D	Squamosa promoter-binding-like protein 10	SPL10	GO:0005634(nucleus);GO:0003677(DNA binding);GO:0046872(metal ion binding);GO:0010358(leaf shaping);GO:0045893(positive regulation of transcription, DNA-dependent);GO:0048510(regulation of timing of transition from vegetative to reproductive phase);GO:0006351(transcription, DNA-dependent)	-	2	1330-1350	1341	2	0	30	50
				BnaC02g14000D	Squamosa promoter-binding-like protein 6	SPL6	GO:0005634(nucleus);GO:0003677(DNA binding);GO:0046872(metal ion binding);GO:0006355(regulation of transcription, DNA-dependent);GO:0006351(transcription, DNA-dependent)	-	2.5	1085-1105	1096	4	-	11	0
				BnaC02g19100D	Squamosa promoter-binding-like protein 6	SPL6	GO:0005634(nucleus);GO:0003677(DNA binding);GO:0046872(metal ion binding);GO:0006355(regulation of transcription, DNA-dependent);GO:0006351(transcription, DNA-dependent)	-	2.5	1106-1126	1117	4	-	11	0
				BnaC02g24210D	12-oxophytodienoate reductase 1	OPR1	GO:0005829(cytosol);GO:0016629(12-oxophytodienoate reductase activity);GO:0010181(FMN binding);GO:0031408(oxylipin biosynthetic process);GO:0046686(response to cadmium ion);GO:0009751(response to salicylic acid stimulus);GO:0009611(response to wounding)	ko00592(alpha-Linolenic acid metabolism)	4	573-592	583	2	-	32	0
				BnaC03g57620D	Squamosa promoter-binding-like protein 11	SPL11	GO:0005634(nucleus);GO:0003677(DNA binding);GO:0046872(metal ion binding);GO:0048510(regulation of timing of transition from vegetative to reproductive phase);GO:0006355(regulation of transcription, DNA-dependent);GO:0006351(transcription, DNA-dependent)	-	2	2293-2313	2304	2	2	30	50
				BnaC04g23930D	Squamosa promoter-binding-like protein 15	SPL15	GO:0005634(nucleus);GO:0003677(DNA binding);GO:0046872(metal ion binding);GO:0042127(regulation of cell proliferation);GO:0008361(regulation of cell size);GO:0006355(regulation of transcription, DNA-dependent);GO:0006351(transcription, DNA-dependent);GO:0010228(vegetative to reproductive phase transition of meristem)	-	2	941-961	952	4	-	32	0
				BnaC04g48150D	Squamosa promoter-binding-like protein 9	SPL9	GO:0005737(cytoplasm);GO:0005634(nucleus);GO:0003677(DNA binding);GO:0046872(metal ion binding);GO:0048366(leaf development);GO:2000025(regulation of leaf formation);GO:0006355(regulation of transcription, DNA-dependent);GO:0006351(transcription, DNA-dependent);GO:0010228(vegetative to reproductive phase transition of meristem)	-	2	2010-2030	2021	1	1	129	81
				BnaC05g21270D	Squamosa promoter-binding-like protein 10	SPL10	GO:0005634(nucleus);GO:0003677(DNA binding);GO:0046872(metal ion binding);GO:0010358(leaf shaping);GO:0045893(positive regulation of transcription, DNA-dependent);GO:0048510(regulation of timing of transition from vegetative to reproductive phase);GO:0006351(transcription, DNA-dependent)	-	2.5	1680-1700	1691	4	-	16	0
				BnaC06g16200D	Squamosa promoter-binding-like protein 15	SPL15	GO:0005634(nucleus);GO:0003677(DNA binding);GO:0046872(metal ion binding);GO:0042127(regulation of cell proliferation);GO:0008361(regulation of cell size);GO:0006355(regulation of transcription, DNA-dependent);GO:0006351(transcription, DNA-dependent);GO:0010228(vegetative to reproductive phase transition of meristem)	-	2	878-898	889	4	4	16	20
				BnaC07g11380D	Squamosa promoter-binding-like protein 10	SPL10	GO:0005634(nucleus);GO:0003677(DNA binding);GO:0046872(metal ion binding);GO:0010358(leaf shaping);GO:0045893(positive regulation of transcription, DNA-dependent);GO:0048510(regulation of timing of transition from vegetative to reproductive phase);GO:0006351(transcription, DNA-dependent)	-	2	1557-1577	1568	2	4	65	40
				BnaC07g11390D	Squamosa promoter-binding-like protein 10	SPL10	GO:0005634(nucleus);GO:0003677(DNA binding);GO:0046872(metal ion binding);GO:0010358(leaf shaping);GO:0045893(positive regulation of transcription, DNA-dependent);GO:0048510(regulation of timing of transition from vegetative to reproductive phase);GO:0006351(transcription, DNA-dependent)	-	2	2358-2378	2369	4	4	8	10
				BnaC07g17030D	Squamosa promoter-binding-like protein 2	SPL2	GO:0005634(nucleus);GO:0003677(DNA binding);GO:0046872(metal ion binding);GO:0048510(regulation of timing of transition from vegetative to reproductive phase);GO:0006355(regulation of transcription, DNA-dependent);GO:0006351(transcription, DNA-dependent)	-	2	3263-3283	3274	4	-	32	0
				BnaC09g17430D	Squamosa promoter-binding-like protein 2	SPL2	GO:0005634(nucleus);GO:0003677(DNA binding);GO:0046872(metal ion binding);GO:0048510(regulation of timing of transition from vegetative to reproductive phase);GO:0006355(regulation of transcription, DNA-dependent);GO:0006351(transcription, DNA-dependent)	-	2	2909-2929	2920	-	2	0	40
		bna-MIR156b-p3	GCTCTCTATACTTCTGTCACC	BnaA09g08870D	-	-	-	-	4	609-628	619	2	-	22	0
				BnaC03g41640D	FHA domain-containing protein DDL	DDL	GO:0009507(chloroplast);GO:0005829(cytosol);GO:0005634(nucleus);GO:0005515(protein binding);GO:0003723(RNA binding);GO:0008283(cell proliferation);GO:0035196(production of miRNAs involved in gene silencing by miRNA);GO:0048638(regulation of developmental growth)	-	4	355-375	366	2	-	419	0
				BnaC05g43300D	ATP-dependent RNA helicase mtr4	MTR4	GO:0005730(nucleolus);GO:0031499(TRAMP complex);GO:0005524(ATP binding);GO:0004004(ATP-dependent RNA helicase activity);GO:0003676(nucleic acid binding);GO:0043630(ncRNA polyadenylation involved in polyadenylation-dependent ncRNA catabolic process);GO:0071049(nuclear retention of pre-mRNA with aberrant 3'-ends at the site of transcription);GO:0006364(rRNA processing);GO:0016078(tRNA catabolic pro…	-	3	556-577	568	4	-	16	0
				BnaC09g09130D	-	-	-	-	4	739-758	749	2	-	22	0
		bna-MIR156c-p3	GCTCTCTATACTTCTGTCAATA	BnaA06g34480D	Pentatricopeptide repeat-containing protein At2g01860	PP142	-	-	4	1280-1300	1291	-	2	0	40
		bna-miR156d,e,f,a_R-1	TGACAGAAGAGAGTGAGCAC	BnaA01g21750D	Amino acid permease 1	AAP1	GO:0016021(integral to membrane);GO:0005886(plasma membrane);GO:0015175(neutral amino acid transmembrane transporter activity);GO:0015293(symporter activity);GO:0043090(amino acid import);GO:0009624(response to nematode)	-	4	87-106	97	4	-	16	0
				BnaA03g13580D	Squamosa promoter-binding-like protein 13A	SP13A	-	-	2	1147-1166	1157	1	0	32	101
				BnaA03g19060D	Probable peptide/nitrate transporter At2g40460	PTR30	GO:0016021(integral to membrane);GO:0005215(transporter activity);GO:0006857(oligopeptide transport)	-	4	5516-5534	5526	-	4	0	8
				BnaA05g02680D	Squamosa promoter-binding-like protein 9	SPL9	GO:0005737(cytoplasm);GO:0005634(nucleus);GO:0003677(DNA binding);GO:0046872(metal ion binding);GO:0048366(leaf development);GO:2000025(regulation of leaf formation);GO:0006355(regulation of transcription, DNA-dependent);GO:0006351(transcription, DNA-dependent);GO:0010228(vegetative to reproductive phase transition of meristem)	-	1	1616-1635	1626	-	4	0	20
				BnaA06g36780D	Squamosa promoter-binding-like protein 2	SPL2	GO:0005634(nucleus);GO:0003677(DNA binding);GO:0046872(metal ion binding);GO:0048510(regulation of timing of transition from vegetative to reproductive phase);GO:0006355(regulation of transcription, DNA-dependent);GO:0006351(transcription, DNA-dependent)	-	1	3001-3020	3011	4	-	32	0
				BnaA07g08830D	Squamosa promoter-binding-like protein 10	SPL10	GO:0005634(nucleus);GO:0003677(DNA binding);GO:0046872(metal ion binding);GO:0010358(leaf shaping);GO:0045893(positive regulation of transcription, DNA-dependent);GO:0048510(regulation of timing of transition from vegetative to reproductive phase);GO:0006351(transcription, DNA-dependent)	-	1	1621-1640	1631	2	2	29	24
				BnaA07g08840D	Squamosa promoter-binding-like protein 10	SPL10	GO:0005634(nucleus);GO:0003677(DNA binding);GO:0046872(metal ion binding);GO:0010358(leaf shaping);GO:0045893(positive regulation of transcription, DNA-dependent);GO:0048510(regulation of timing of transition from vegetative to reproductive phase);GO:0006351(transcription, DNA-dependent)	-	1	2287-2306	2297	4	2	32	81
				BnaA07g17550D	Squamosa promoter-binding-like protein 15	SPL15	GO:0005634(nucleus);GO:0003677(DNA binding);GO:0046872(metal ion binding);GO:0042127(regulation of cell proliferation);GO:0008361(regulation of cell size);GO:0006355(regulation of transcription, DNA-dependent);GO:0006351(transcription, DNA-dependent);GO:0010228(vegetative to reproductive phase transition of meristem)	-	1	864-883	874	0	-	48	0
				BnaA07g27730D	Squamosa promoter-binding-like protein 6	SPL6	GO:0005634(nucleus);GO:0003677(DNA binding);GO:0046872(metal ion binding);GO:0006355(regulation of transcription, DNA-dependent);GO:0006351(transcription, DNA-dependent)	-	2	629-648	639	-	4	0	40
				BnaA09g16340D	Squamosa promoter-binding-like protein 2	SPL2	GO:0005634(nucleus);GO:0003677(DNA binding);GO:0046872(metal ion binding);GO:0048510(regulation of timing of transition from vegetative to reproductive phase);GO:0006355(regulation of transcription, DNA-dependent);GO:0006351(transcription, DNA-dependent)	-	1	2039-2058	2049	2	1	32	81
				BnaA09g27960D	Squamosa promoter-binding-like protein 10	SPL10	GO:0005634(nucleus);GO:0003677(DNA binding);GO:0046872(metal ion binding);GO:0010358(leaf shaping);GO:0045893(positive regulation of transcription, DNA-dependent);GO:0048510(regulation of timing of transition from vegetative to reproductive phase);GO:0006351(transcription, DNA-dependent)	-	1.5	1528-1547	1538	4	4	16	20
				BnaAnng25050D	Squamosa promoter-binding-like protein 10	SPL10	GO:0005634(nucleus);GO:0003677(DNA binding);GO:0046872(metal ion binding);GO:0010358(leaf shaping);GO:0045893(positive regulation of transcription, DNA-dependent);GO:0048510(regulation of timing of transition from vegetative to reproductive phase);GO:0006351(transcription, DNA-dependent)	-	1	1330-1349	1340	2	2	29	24
				BnaC01g13070D	-	-	-	-	4	1317-1337	1328	-	2	0	81
				BnaC01g42990D	Amino acid permease 1	AAP1	GO:0016021(integral to membrane);GO:0005886(plasma membrane);GO:0015175(neutral amino acid transmembrane transporter activity);GO:0015293(symporter activity);GO:0043090(amino acid import);GO:0009624(response to nematode)	-	4	87-106	97	4	-	16	0
				BnaC03g16490D	Squamosa promoter-binding-like protein 13A	SP13A	-	-	2	1158-1177	1168	1	0	32	101
				BnaC03g57620D	Squamosa promoter-binding-like protein 11	SPL11	GO:0005634(nucleus);GO:0003677(DNA binding);GO:0046872(metal ion binding);GO:0048510(regulation of timing of transition from vegetative to reproductive phase);GO:0006355(regulation of transcription, DNA-dependent);GO:0006351(transcription, DNA-dependent)	-	1	2293-2312	2303	2	2	29	24
				BnaC04g02520D	Squamosa promoter-binding-like protein 9	SPL9	GO:0005737(cytoplasm);GO:0005634(nucleus);GO:0003677(DNA binding);GO:0046872(metal ion binding);GO:0048366(leaf development);GO:2000025(regulation of leaf formation);GO:0006355(regulation of transcription, DNA-dependent);GO:0006351(transcription, DNA-dependent);GO:0010228(vegetative to reproductive phase transition of meristem)	-	1	1666-1685	1676	-	4	0	20
				BnaC04g23930D	Squamosa promoter-binding-like protein 15	SPL15	GO:0005634(nucleus);GO:0003677(DNA binding);GO:0046872(metal ion binding);GO:0042127(regulation of cell proliferation);GO:0008361(regulation of cell size);GO:0006355(regulation of transcription, DNA-dependent);GO:0006351(transcription, DNA-dependent);GO:0010228(vegetative to reproductive phase transition of meristem)	-	1	941-960	951	-	4	0	40
				BnaC04g48150D	Squamosa promoter-binding-like protein 9	SPL9	GO:0005737(cytoplasm);GO:0005634(nucleus);GO:0003677(DNA binding);GO:0046872(metal ion binding);GO:0048366(leaf development);GO:2000025(regulation of leaf formation);GO:0006355(regulation of transcription, DNA-dependent);GO:0006351(transcription, DNA-dependent);GO:0010228(vegetative to reproductive phase transition of meristem)	-	1	2010-2029	2020	1	1	129	81
				BnaC05g21270D	Squamosa promoter-binding-like protein 10	SPL10	GO:0005634(nucleus);GO:0003677(DNA binding);GO:0046872(metal ion binding);GO:0010358(leaf shaping);GO:0045893(positive regulation of transcription, DNA-dependent);GO:0048510(regulation of timing of transition from vegetative to reproductive phase);GO:0006351(transcription, DNA-dependent)	-	1.5	1680-1699	1690	4	4	16	20
				BnaC05g21280D	Squamosa promoter-binding-like protein 10	SPL10	GO:0005634(nucleus);GO:0003677(DNA binding);GO:0046872(metal ion binding);GO:0010358(leaf shaping);GO:0045893(positive regulation of transcription, DNA-dependent);GO:0048510(regulation of timing of transition from vegetative to reproductive phase);GO:0006351(transcription, DNA-dependent)	-	1.5	1462-1481	1472	2	2	29	24
				BnaC06g16200D	Squamosa promoter-binding-like protein 15	SPL15	GO:0005634(nucleus);GO:0003677(DNA binding);GO:0046872(metal ion binding);GO:0042127(regulation of cell proliferation);GO:0008361(regulation of cell size);GO:0006355(regulation of transcription, DNA-dependent);GO:0006351(transcription, DNA-dependent);GO:0010228(vegetative to reproductive phase transition of meristem)	-	1	878-897	888	2	-	48	0
				BnaC07g11380D	Squamosa promoter-binding-like protein 10	SPL10	GO:0005634(nucleus);GO:0003677(DNA binding);GO:0046872(metal ion binding);GO:0010358(leaf shaping);GO:0045893(positive regulation of transcription, DNA-dependent);GO:0048510(regulation of timing of transition from vegetative to reproductive phase);GO:0006351(transcription, DNA-dependent)	-	1	1557-1576	1567	2	2	65	81
				BnaC07g11390D	Squamosa promoter-binding-like protein 10	SPL10	GO:0005634(nucleus);GO:0003677(DNA binding);GO:0046872(metal ion binding);GO:0010358(leaf shaping);GO:0045893(positive regulation of transcription, DNA-dependent);GO:0048510(regulation of timing of transition from vegetative to reproductive phase);GO:0006351(transcription, DNA-dependent)	-	1	2358-2377	2368	3	2	13	24
				BnaC07g17030D	Squamosa promoter-binding-like protein 2	SPL2	GO:0005634(nucleus);GO:0003677(DNA binding);GO:0046872(metal ion binding);GO:0048510(regulation of timing of transition from vegetative to reproductive phase);GO:0006355(regulation of transcription, DNA-dependent);GO:0006351(transcription, DNA-dependent)	-	1	3263-3282	3273	1	-	65	0
				BnaC09g17430D	Squamosa promoter-binding-like protein 2	SPL2	GO:0005634(nucleus);GO:0003677(DNA binding);GO:0046872(metal ion binding);GO:0048510(regulation of timing of transition from vegetative to reproductive phase);GO:0006355(regulation of transcription, DNA-dependent);GO:0006351(transcription, DNA-dependent)	-	1	2909-2928	2919	2	1	32	81
				BnaCnng61400D	Squamosa promoter-binding-like protein 6	SPL6	GO:0005634(nucleus);GO:0003677(DNA binding);GO:0046872(metal ion binding);GO:0006355(regulation of transcription, DNA-dependent);GO:0006351(transcription, DNA-dependent)	-	0	760-779	770	-	4	0	40
		bna-miR156e_R+1	TGACAGAAGAGAGTGAGCACT	BnaA01g21750D	Amino acid permease 1	AAP1	GO:0016021(integral to membrane);GO:0005886(plasma membrane);GO:0015175(neutral amino acid transmembrane transporter activity);GO:0015293(symporter activity);GO:0043090(amino acid import);GO:0009624(response to nematode)	-	4	86-106	97	4	-	16	0
				BnaA03g13580D	Squamosa promoter-binding-like protein 13A	SP13A	-	-	3	1146-1166	1157	1	0	32	101
				BnaA03g19060D	Probable peptide/nitrate transporter At2g40460	PTR30	GO:0016021(integral to membrane);GO:0005215(transporter activity);GO:0006857(oligopeptide transport)	-	4	4563-4582	4574	-	4	0	8
				BnaA03g19060D	Probable peptide/nitrate transporter At2g40460	PTR30	GO:0016021(integral to membrane);GO:0005215(transporter activity);GO:0006857(oligopeptide transport)	-	4	5515-5534	5526	-	4	0	8
				BnaA05g02680D	Squamosa promoter-binding-like protein 9	SPL9	GO:0005737(cytoplasm);GO:0005634(nucleus);GO:0003677(DNA binding);GO:0046872(metal ion binding);GO:0048366(leaf development);GO:2000025(regulation of leaf formation);GO:0006355(regulation of transcription, DNA-dependent);GO:0006351(transcription, DNA-dependent);GO:0010228(vegetative to reproductive phase transition of meristem)	-	2	1615-1635	1626	-	4	0	20
				BnaA06g36780D	Squamosa promoter-binding-like protein 2	SPL2	GO:0005634(nucleus);GO:0003677(DNA binding);GO:0046872(metal ion binding);GO:0048510(regulation of timing of transition from vegetative to reproductive phase);GO:0006355(regulation of transcription, DNA-dependent);GO:0006351(transcription, DNA-dependent)	-	1.5	3000-3020	3011	4	-	32	0
				BnaA07g08830D	Squamosa promoter-binding-like protein 10	SPL10	GO:0005634(nucleus);GO:0003677(DNA binding);GO:0046872(metal ion binding);GO:0010358(leaf shaping);GO:0045893(positive regulation of transcription, DNA-dependent);GO:0048510(regulation of timing of transition from vegetative to reproductive phase);GO:0006351(transcription, DNA-dependent)	-	1	1620-1640	1631	2	2	29	24
				BnaA07g08840D	Squamosa promoter-binding-like protein 10	SPL10	GO:0005634(nucleus);GO:0003677(DNA binding);GO:0046872(metal ion binding);GO:0010358(leaf shaping);GO:0045893(positive regulation of transcription, DNA-dependent);GO:0048510(regulation of timing of transition from vegetative to reproductive phase);GO:0006351(transcription, DNA-dependent)	-	2	2286-2306	2297	4	2	32	81
				BnaA07g17550D	Squamosa promoter-binding-like protein 15	SPL15	GO:0005634(nucleus);GO:0003677(DNA binding);GO:0046872(metal ion binding);GO:0042127(regulation of cell proliferation);GO:0008361(regulation of cell size);GO:0006355(regulation of transcription, DNA-dependent);GO:0006351(transcription, DNA-dependent);GO:0010228(vegetative to reproductive phase transition of meristem)	-	2	863-883	874	0	-	48	0
				BnaA07g27730D	Squamosa promoter-binding-like protein 6	SPL6	GO:0005634(nucleus);GO:0003677(DNA binding);GO:0046872(metal ion binding);GO:0006355(regulation of transcription, DNA-dependent);GO:0006351(transcription, DNA-dependent)	-	3	628-648	639	-	4	0	40
				BnaA09g16340D	Squamosa promoter-binding-like protein 2	SPL2	GO:0005634(nucleus);GO:0003677(DNA binding);GO:0046872(metal ion binding);GO:0048510(regulation of timing of transition from vegetative to reproductive phase);GO:0006355(regulation of transcription, DNA-dependent);GO:0006351(transcription, DNA-dependent)	-	1.5	2038-2058	2049	2	1	32	81
				BnaA09g27960D	Squamosa promoter-binding-like protein 10	SPL10	GO:0005634(nucleus);GO:0003677(DNA binding);GO:0046872(metal ion binding);GO:0010358(leaf shaping);GO:0045893(positive regulation of transcription, DNA-dependent);GO:0048510(regulation of timing of transition from vegetative to reproductive phase);GO:0006351(transcription, DNA-dependent)	-	2.5	1527-1547	1538	4	4	16	20
				BnaAnng25050D	Squamosa promoter-binding-like protein 10	SPL10	GO:0005634(nucleus);GO:0003677(DNA binding);GO:0046872(metal ion binding);GO:0010358(leaf shaping);GO:0045893(positive regulation of transcription, DNA-dependent);GO:0048510(regulation of timing of transition from vegetative to reproductive phase);GO:0006351(transcription, DNA-dependent)	-	1	1329-1349	1340	2	2	29	24
				BnaC01g42990D	Amino acid permease 1	AAP1	GO:0016021(integral to membrane);GO:0005886(plasma membrane);GO:0015175(neutral amino acid transmembrane transporter activity);GO:0015293(symporter activity);GO:0043090(amino acid import);GO:0009624(response to nematode)	-	4	86-106	97	4	-	16	0
				BnaC03g16490D	Squamosa promoter-binding-like protein 13A	SP13A	-	-	3	1157-1177	1168	1	0	32	101
				BnaC03g22680D	Probable peptide/nitrate transporter At2g40460	PTR30	GO:0016021(integral to membrane);GO:0005215(transporter activity);GO:0006857(oligopeptide transport)	-	4	5108-5127	5119	-	4	0	8
				BnaC03g57620D	Squamosa promoter-binding-like protein 11	SPL11	GO:0005634(nucleus);GO:0003677(DNA binding);GO:0046872(metal ion binding);GO:0048510(regulation of timing of transition from vegetative to reproductive phase);GO:0006355(regulation of transcription, DNA-dependent);GO:0006351(transcription, DNA-dependent)	-	1	2292-2312	2303	2	2	29	24
				BnaC04g02520D	Squamosa promoter-binding-like protein 9	SPL9	GO:0005737(cytoplasm);GO:0005634(nucleus);GO:0003677(DNA binding);GO:0046872(metal ion binding);GO:0048366(leaf development);GO:2000025(regulation of leaf formation);GO:0006355(regulation of transcription, DNA-dependent);GO:0006351(transcription, DNA-dependent);GO:0010228(vegetative to reproductive phase transition of meristem)	-	2	1665-1685	1676	-	4	0	20
				BnaC04g23930D	Squamosa promoter-binding-like protein 15	SPL15	GO:0005634(nucleus);GO:0003677(DNA binding);GO:0046872(metal ion binding);GO:0042127(regulation of cell proliferation);GO:0008361(regulation of cell size);GO:0006355(regulation of transcription, DNA-dependent);GO:0006351(transcription, DNA-dependent);GO:0010228(vegetative to reproductive phase transition of meristem)	-	2	940-960	951	-	4	0	40
				BnaC04g48150D	Squamosa promoter-binding-like protein 9	SPL9	GO:0005737(cytoplasm);GO:0005634(nucleus);GO:0003677(DNA binding);GO:0046872(metal ion binding);GO:0048366(leaf development);GO:2000025(regulation of leaf formation);GO:0006355(regulation of transcription, DNA-dependent);GO:0006351(transcription, DNA-dependent);GO:0010228(vegetative to reproductive phase transition of meristem)	-	2	2009-2029	2020	1	1	129	81
				BnaC05g21270D	Squamosa promoter-binding-like protein 10	SPL10	GO:0005634(nucleus);GO:0003677(DNA binding);GO:0046872(metal ion binding);GO:0010358(leaf shaping);GO:0045893(positive regulation of transcription, DNA-dependent);GO:0048510(regulation of timing of transition from vegetative to reproductive phase);GO:0006351(transcription, DNA-dependent)	-	2.5	1679-1699	1690	4	4	16	20
				BnaC05g21280D	Squamosa promoter-binding-like protein 10	SPL10	GO:0005634(nucleus);GO:0003677(DNA binding);GO:0046872(metal ion binding);GO:0010358(leaf shaping);GO:0045893(positive regulation of transcription, DNA-dependent);GO:0048510(regulation of timing of transition from vegetative to reproductive phase);GO:0006351(transcription, DNA-dependent)	-	1.5	1461-1481	1472	2	2	29	24
				BnaC06g16200D	Squamosa promoter-binding-like protein 15	SPL15	GO:0005634(nucleus);GO:0003677(DNA binding);GO:0046872(metal ion binding);GO:0042127(regulation of cell proliferation);GO:0008361(regulation of cell size);GO:0006355(regulation of transcription, DNA-dependent);GO:0006351(transcription, DNA-dependent);GO:0010228(vegetative to reproductive phase transition of meristem)	-	2	877-897	888	2	-	48	0
				BnaC07g11380D	Squamosa promoter-binding-like protein 10	SPL10	GO:0005634(nucleus);GO:0003677(DNA binding);GO:0046872(metal ion binding);GO:0010358(leaf shaping);GO:0045893(positive regulation of transcription, DNA-dependent);GO:0048510(regulation of timing of transition from vegetative to reproductive phase);GO:0006351(transcription, DNA-dependent)	-	2	1556-1576	1567	2	2	65	81
				BnaC07g11390D	Squamosa promoter-binding-like protein 10	SPL10	GO:0005634(nucleus);GO:0003677(DNA binding);GO:0046872(metal ion binding);GO:0010358(leaf shaping);GO:0045893(positive regulation of transcription, DNA-dependent);GO:0048510(regulation of timing of transition from vegetative to reproductive phase);GO:0006351(transcription, DNA-dependent)	-	1	2357-2377	2368	3	2	13	24
				BnaC07g17030D	Squamosa promoter-binding-like protein 2	SPL2	GO:0005634(nucleus);GO:0003677(DNA binding);GO:0046872(metal ion binding);GO:0048510(regulation of timing of transition from vegetative to reproductive phase);GO:0006355(regulation of transcription, DNA-dependent);GO:0006351(transcription, DNA-dependent)	-	1.5	3262-3282	3273	1	-	65	0
				BnaC09g17430D	Squamosa promoter-binding-like protein 2	SPL2	GO:0005634(nucleus);GO:0003677(DNA binding);GO:0046872(metal ion binding);GO:0048510(regulation of timing of transition from vegetative to reproductive phase);GO:0006355(regulation of transcription, DNA-dependent);GO:0006351(transcription, DNA-dependent)	-	1.5	2908-2928	2919	2	1	32	81
				BnaCnng61400D	Squamosa promoter-binding-like protein 6	SPL6	GO:0005634(nucleus);GO:0003677(DNA binding);GO:0046872(metal ion binding);GO:0006355(regulation of transcription, DNA-dependent);GO:0006351(transcription, DNA-dependent)	-	1	759-779	770	-	4	0	40
		bna-MIR156e-p3	GCTCACCTCTCTTTCTGTCAGT	BnaA03g17380D	L-type lectin-domain containing receptor kinase IV.1	LRK41	GO:0016021(integral to membrane);GO:0005886(plasma membrane);GO:0005524(ATP binding);GO:0004674(protein serine/threonine kinase activity);GO:0004872(receptor activity);GO:0005529(sugar binding);GO:0009751(response to salicylic acid stimulus)	-	4	1235-1255	1246	4	-	16	0
	Con-BA	bra-miR156a-3p, ath-MIR156e-p3	GCTTACTCTCTCTCTGTCACC	BnaA02g16030D	Putative receptor-like protein kinase At1g72540	Y1725	GO:0005524(ATP binding);GO:0004674(protein serine/threonine kinase activity)	-	4	2388-2408	2399	2	-	48	0
				BnaA09g11450D	Uncharacterized protein At5g41620	Y5162	GO:0009507(chloroplast);GO:0005886(plasma membrane)	-	4	1421-1440	1431	4	-	16	0
				BnaAnng00610D	-	-	-	ko00510(N-Glycan biosynthesis)	4	546-565	556	4	2	8	30
				BnaAnng15980D	Protein GrpE	GRPE	GO:0005737(cytoplasm);GO:0000774(adenyl-nucleotide exchange factor activity);GO:0051087(chaperone binding);GO:0042803(protein homodimerization activity);GO:0006457(protein folding);GO:0006950(response to stress)	-	4	1405-1425	1416	-	4	0	40
				BnaC02g03380D	-	-	-	ko00510(N-Glycan biosynthesis)	4	549-568	559	4	2	8	30
				BnaC04g22150D	-	-	-	-	4	754-774	765	4	-	16	0
				BnaC09g11910D	Uncharacterized protein At5g41620	Y5162	GO:0009507(chloroplast);GO:0005886(plasma membrane)	-	4	1476-1495	1486	4	-	16	0
miR158	Con-BA	bra-miR158-3p	TTTCCAAATGTAGACAAAGCA	BnaA09g11120D	Pentatricopeptide repeat-containing protein At1g12300, mitochondrial	PPR36	GO:0005739(mitochondrion);GO:0005488(binding)	-	4	10104-10124	10115	0	0	113	182
				BnaC09g11440D	Pentatricopeptide repeat-containing protein At1g12300, mitochondrial	PPR36	GO:0005739(mitochondrion);GO:0005488(binding)	-	4	387-407	398	0	0	113	182
miR159	Con-BN	bna-miR159	TTTGGATTGAAGGGAGCTCTA	BnaA02g09340D	Transcription factor GAMYB	GAM1	GO:0005634(nucleus);GO:0003677(DNA binding);GO:0030154(cell differentiation);GO:0009908(flower development);GO:0006355(regulation of transcription, DNA-dependent);GO:0006351(transcription, DNA-dependent)	-	3	1202-1222	1213	-	4	0	40
				BnaA03g11630D	Transcription factor GAMYB	GAM1	GO:0005634(nucleus);GO:0003677(DNA binding);GO:0030154(cell differentiation);GO:0009908(flower development);GO:0006355(regulation of transcription, DNA-dependent);GO:0006351(transcription, DNA-dependent)	-	4	1262-1282	1273	4	0	16	242
				BnaA03g22590D	Transcription factor MYB104	MY104	GO:0005634(nucleus);GO:0003677(DNA binding);GO:0006355(regulation of transcription, DNA-dependent);GO:0006351(transcription, DNA-dependent)	-	3.5	1375-1395	1386	0	0	306	242
				BnaA05g27620D	Transcription factor GAMYB	GAM1	GO:0005634(nucleus);GO:0003677(DNA binding);GO:0030154(cell differentiation);GO:0009908(flower development);GO:0006355(regulation of transcription, DNA-dependent);GO:0006351(transcription, DNA-dependent)	-	3.5	1624-1644	1635	0	0	1043	1090
				BnaAnng27960D	Transcription factor GAMYB	GAM1	GO:0005634(nucleus);GO:0003677(DNA binding);GO:0030154(cell differentiation);GO:0009908(flower development);GO:0006355(regulation of transcription, DNA-dependent);GO:0006351(transcription, DNA-dependent)	-	1.5	1020-1040	1031	0	-	161	0
				BnaC03g26620D	Transcription factor MYB104	MY104	GO:0005634(nucleus);GO:0003677(DNA binding);GO:0006355(regulation of transcription, DNA-dependent);GO:0006351(transcription, DNA-dependent)	-	3.5	1489-1509	1500	0	0	274	444
				BnaC03g71630D	Transcription factor GAMYB	GAM1	GO:0005634(nucleus);GO:0003677(DNA binding);GO:0030154(cell differentiation);GO:0009908(flower development);GO:0006355(regulation of transcription, DNA-dependent);GO:0006351(transcription, DNA-dependent)	-	4	2491-2511	2502	4	0	16	242
				BnaCnng31260D	Transcription factor GAMYB	GAM1	GO:0005634(nucleus);GO:0003677(DNA binding);GO:0030154(cell differentiation);GO:0009908(flower development);GO:0006355(regulation of transcription, DNA-dependent);GO:0006351(transcription, DNA-dependent)	-	3.5	1087-1107	1098	0	0	1107	1090
				BnaCnng49390D	Transcription factor GAMYB	GAM1	GO:0005634(nucleus);GO:0003677(DNA binding);GO:0030154(cell differentiation);GO:0009908(flower development);GO:0006355(regulation of transcription, DNA-dependent);GO:0006351(transcription, DNA-dependent)	-	3.5	1054-1074	1065	0	0	1720	1090
				BnaCnng51960D	Transcription factor GAMYB	GAM1	GO:0005634(nucleus);GO:0003677(DNA binding);GO:0030154(cell differentiation);GO:0009908(flower development);GO:0006355(regulation of transcription, DNA-dependent);GO:0006351(transcription, DNA-dependent)	-	1.5	1032-1052	1043	4	-	32	0
miR160	Con-BN	bna-miR160a,b,c,d	TGCCTGGCTCCCTGTATGCCA	BnaA01g06910D	Auxin response factor 16	ARFP	GO:0005634(nucleus);GO:0003677(DNA binding);GO:0046983(protein dimerization activity);GO:0009734(auxin mediated signaling pathway);GO:0051301(cell division);GO:0007389(pattern specification process);GO:0006355(regulation of transcription, DNA-dependent);GO:0048829(root cap development);GO:0006351(transcription, DNA-dependent)	-	2.5	2330-2350	2341	0	0	2089	1908
				BnaA02g11050D	BAG family molecular chaperone regulator 1	BAG1	-	-	3.5	423-442	433	2	2	48	131
				BnaA03g12820D	BAG family molecular chaperone regulator 1	BAG1	-	-	3.5	432-451	442	1	0	97	293
				BnaA03g49980D	Auxin response factor 16	ARFP	GO:0005634(nucleus);GO:0003677(DNA binding);GO:0046983(protein dimerization activity);GO:0009734(auxin mediated signaling pathway);GO:0051301(cell division);GO:0007389(pattern specification process);GO:0006355(regulation of transcription, DNA-dependent);GO:0048829(root cap development);GO:0006351(transcription, DNA-dependent)	-	2.5	5306-5326	5317	0	0	2089	1908
				BnaA07g13830D	Auxin response factor 10	ARFJ	GO:0005634(nucleus);GO:0003677(DNA binding);GO:0046983(protein dimerization activity);GO:0009738(abscisic acid mediated signaling pathway);GO:0009734(auxin mediated signaling pathway);GO:0051301(cell division);GO:0048589(developmental growth);GO:0010154(fruit development);GO:0048366(leaf development);GO:0007389(pattern specification process);GO:0048441(petal development);GO:0031540(regulation of …	-	2	1687-1707	1698	0	0	532	323
				BnaA07g20790D	Auxin response factor 17	ARFQ	GO:0005634(nucleus);GO:0003677(DNA binding);GO:0048830(adventitious root development);GO:0009653(anatomical structure morphogenesis);GO:0009734(auxin mediated signaling pathway);GO:0006355(regulation of transcription, DNA-dependent);GO:0006351(transcription, DNA-dependent)	-	0.5	1318-1338	1329	0	0	887	1494
				BnaA07g33740D	Auxin response factor 17	ARFQ	GO:0005634(nucleus);GO:0003677(DNA binding);GO:0048830(adventitious root development);GO:0009653(anatomical structure morphogenesis);GO:0009734(auxin mediated signaling pathway);GO:0006355(regulation of transcription, DNA-dependent);GO:0006351(transcription, DNA-dependent)	-	1.5	291-311	302	0	0	2822	7389
				BnaC01g08330D	Auxin response factor 16	ARFP	GO:0005634(nucleus);GO:0003677(DNA binding);GO:0046983(protein dimerization activity);GO:0009734(auxin mediated signaling pathway);GO:0051301(cell division);GO:0007389(pattern specification process);GO:0006355(regulation of transcription, DNA-dependent);GO:0048829(root cap development);GO:0006351(transcription, DNA-dependent)	-	2.5	2313-2333	2324	0	0	2089	1908
				BnaC02g45010D	BAG family molecular chaperone regulator 1	BAG1	-	-	3.5	426-445	436	2	2	48	131
				BnaC04g15900D	Auxin response factor 10	ARFJ	GO:0005634(nucleus);GO:0003677(DNA binding);GO:0046983(protein dimerization activity);GO:0009738(abscisic acid mediated signaling pathway);GO:0009734(auxin mediated signaling pathway);GO:0051301(cell division);GO:0048589(developmental growth);GO:0010154(fruit development);GO:0048366(leaf development);GO:0007389(pattern specification process);GO:0048441(petal development);GO:0031540(regulation of …	-	2	1688-1708	1699	0	0	532	323
				BnaC06g20640D	Auxin response factor 17	ARFQ	GO:0005634(nucleus);GO:0003677(DNA binding);GO:0048830(adventitious root development);GO:0009653(anatomical structure morphogenesis);GO:0009734(auxin mediated signaling pathway);GO:0006355(regulation of transcription, DNA-dependent);GO:0006351(transcription, DNA-dependent)	-	0.5	1334-1354	1345	0	0	887	1494
				BnaC06g38360D	Auxin response factor 17	ARFQ	GO:0005634(nucleus);GO:0003677(DNA binding);GO:0048830(adventitious root development);GO:0009653(anatomical structure morphogenesis);GO:0009734(auxin mediated signaling pathway);GO:0006355(regulation of transcription, DNA-dependent);GO:0006351(transcription, DNA-dependent)	-	1.5	1843-1863	1854	0	0	2822	7389
				BnaC07g42330D	Auxin response factor 16	ARFP	GO:0005634(nucleus);GO:0003677(DNA binding);GO:0046983(protein dimerization activity);GO:0009734(auxin mediated signaling pathway);GO:0051301(cell division);GO:0007389(pattern specification process);GO:0006355(regulation of transcription, DNA-dependent);GO:0048829(root cap development);GO:0006351(transcription, DNA-dependent)	-	2.5	6290-6310	6301	2	2	2089	1908
				BnaCnng57590D	BAG family molecular chaperone regulator 1	BAG1	-	-	3.5	466-485	476	2	0	65	252
		bna-MIR160c-p3,d-p3	GCGTACAGAGTAGTCAAGCATG	BnaA01g22910D	Pentatricopeptide repeat-containing protein At1g61870, mitochondrial	PPR87	GO:0005743(mitochondrial inner membrane);GO:0000166(nucleotide binding);GO:0003723(RNA binding)	-	4	390-411	402	4	-	16	0
				BnaA03g50490D	-	-	-	-	3	1103-1123	1114	2	2	113	101
				BnaC01g29970D	Pentatricopeptide repeat-containing protein At1g61870, mitochondrial	PPR87	GO:0005743(mitochondrial inner membrane);GO:0000166(nucleotide binding);GO:0003723(RNA binding)	-	4	390-411	402	4	-	16	0
				BnaC07g42850D	Translation initiation factor IF-3	IF3	GO:0005737(cytoplasm);GO:0003743(translation initiation factor activity)	-	3	1139-1159	1150	2	2	113	101
miR161	Con-BN	bna-miR161	TCAATGCACTGAAAGTGACTA	BnaA01g02370D	Pentatricopeptide repeat-containing protein At4g34830, chloroplastic	PP349	GO:0009507(chloroplast);GO:0005488(binding);GO:0048255(mRNA stabilization)	-	4	3365-3385	3376	2	4	32	20
				BnaA04g10910D	Pentatricopeptide repeat-containing protein At5g41170, mitochondrial	PP412	GO:0005739(mitochondrion);GO:0005488(binding)	-	3	707-727	718	4	1	11	27
				BnaA07g16740D	Pentatricopeptide repeat-containing protein At5g41170, mitochondrial	PP412	GO:0005739(mitochondrion);GO:0005488(binding)	-	3	577-597	588	4	1	11	27
				BnaA09g45590D	Pentatricopeptide repeat-containing protein At1g12300, mitochondrial	PPR36	GO:0005739(mitochondrion);GO:0005488(binding)	-	3	1090-1110	1101	4	-	11	0
				BnaA09g46700D	Pentatricopeptide repeat-containing protein At1g12300, mitochondrial	PPR36	GO:0005739(mitochondrion);GO:0005488(binding)	-	3	563-583	574	4	0	32	121
				BnaC01g03630D	Pentatricopeptide repeat-containing protein At4g34830, chloroplastic	PP349	GO:0009507(chloroplast);GO:0005488(binding);GO:0048255(mRNA stabilization)	-	4	3432-3452	3443	2	4	65	20
				BnaC04g33130D	Pentatricopeptide repeat-containing protein At5g41170, mitochondrial	PP412	GO:0005739(mitochondrion);GO:0005488(binding)	-	3	710-730	721	4	2	11	27
				BnaC08g41520D	Pentatricopeptide repeat-containing protein At1g12775, mitochondrial	PPR39	GO:0005739(mitochondrion);GO:0005488(binding)	-	4	287-307	298	4	-	11	0
				BnaC09g37630D	Pentatricopeptide repeat-containing protein At1g12620	PPR37	GO:0005488(binding)	-	3	984-1004	995	-	0	0	121
miR162	Con-BA	bra-miR162-3p	TCGATAAACCTCTGCATCCAG	BnaA03g46660D	Heat shock 70 kDa protein 7, chloroplastic	HSP7G	-	ko03040(Spliceosome);ko04010(MAPK signaling pathway);ko04144(Endocytosis);ko04612(Antigen processing and presentation)	3	147-167	158	-	3	0	61
				BnaA08g14780D	Heat shock 70 kDa protein 7, chloroplastic	HSP7G	-	ko03040(Spliceosome);ko04010(MAPK signaling pathway);ko04144(Endocytosis);ko04612(Antigen processing and presentation)	3	147-167	158	4	3	16	34
				BnaC07g38890D	Heat shock 70 kDa protein 6, chloroplastic	HSP7F	-	ko03040(Spliceosome);ko04010(MAPK signaling pathway);ko04144(Endocytosis);ko04612(Antigen processing and presentation)	3	528-548	539	-	3	0	74
				BnaC08g11440D	Heat shock 70 kDa protein 6, chloroplastic	HSP7F	-	ko03040(Spliceosome);ko04010(MAPK signaling pathway);ko04144(Endocytosis);ko04612(Antigen processing and presentation)	3	147-167	158	4	3	16	34
miR164	Con-BN	bna-miR164a	TGGAGAAGCAGGGCACGTGCA	BnaA03g33770D	Protein CUP-SHAPED COTYLEDON 1	NAC54	GO:0005634(nucleus);GO:0003677(DNA binding);GO:0003700(sequence-specific DNA binding transcription factor activity);GO:0010160(formation of organ boundary);GO:0048467(gynoecium development);GO:0048527(lateral root development);GO:0051782(negative regulation of cell division);GO:0010072(primary shoot apical meristem specification);GO:0010223(secondary shoot formation)	-	3	1326-1346	1337	-	4	0	20
				BnaA05g26240D	NAC domain-containing protein 21/22	NAC22	GO:0005634(nucleus);GO:0003677(DNA binding);GO:0003700(sequence-specific DNA binding transcription factor activity);GO:0009734(auxin mediated signaling pathway);GO:0048527(lateral root development);GO:0010072(primary shoot apical meristem specification)	-	2	3120-3140	3131	0	4	113	20
				BnaA06g37020D	Protein WEAK CHLOROPLAST MOVEMENT UNDER BLUE LIGHT-like 3	WEL3	-	ko04010(MAPK signaling pathway)	3.5	555-576	567	-	2	0	40
				BnaA08g00130D	NAC domain-containing protein 21/22	NAC22	GO:0005634(nucleus);GO:0003677(DNA binding);GO:0003700(sequence-specific DNA binding transcription factor activity);GO:0009734(auxin mediated signaling pathway);GO:0048527(lateral root development);GO:0010072(primary shoot apical meristem specification)	-	2	4077-4097	4088	0	-	548	0
				BnaAnng06380D	NAC domain-containing protein 100	NC100	GO:0005634(nucleus);GO:0003677(DNA binding);GO:0006355(regulation of transcription, DNA-dependent);GO:0006351(transcription, DNA-dependent)	-	2.5	1024-1044	1035	0	4	48	20
				BnaAnng07000D	NAC domain-containing protein 100	NC100	GO:0005634(nucleus);GO:0003677(DNA binding);GO:0006355(regulation of transcription, DNA-dependent);GO:0006351(transcription, DNA-dependent)	-	1.5	806-826	817	0	0	161	162
				BnaC02g01470D	NAC domain-containing protein 100	NC100	GO:0005634(nucleus);GO:0003677(DNA binding);GO:0006355(regulation of transcription, DNA-dependent);GO:0006351(transcription, DNA-dependent)	-	2.5	906-926	917	0	4	48	20
				BnaC03g38960D	Protein CUP-SHAPED COTYLEDON 1	NAC54	GO:0005634(nucleus);GO:0003677(DNA binding);GO:0003700(sequence-specific DNA binding transcription factor activity);GO:0010160(formation of organ boundary);GO:0048467(gynoecium development);GO:0048527(lateral root development);GO:0051782(negative regulation of cell division);GO:0010072(primary shoot apical meristem specification);GO:0010223(secondary shoot formation)	-	3	1250-1270	1261	-	4	0	20
				BnaC03g70990D	NAC domain-containing protein 21/22	NAC22	GO:0005634(nucleus);GO:0003677(DNA binding);GO:0003700(sequence-specific DNA binding transcription factor activity);GO:0009734(auxin mediated signaling pathway);GO:0048527(lateral root development);GO:0010072(primary shoot apical meristem specification)	-	2	4786-4806	4797	0	-	194	0
				BnaC05g40360D	NAC domain-containing protein 21/22	NAC22	GO:0005634(nucleus);GO:0003677(DNA binding);GO:0003700(sequence-specific DNA binding transcription factor activity);GO:0009734(auxin mediated signaling pathway);GO:0048527(lateral root development);GO:0010072(primary shoot apical meristem specification)	-	2	1838-1858	1849	0	4	113	20
				BnaC07g49940D	NAC domain-containing protein 100	NC100	GO:0005634(nucleus);GO:0003677(DNA binding);GO:0006355(regulation of transcription, DNA-dependent);GO:0006351(transcription, DNA-dependent)	-	1.5	955-975	966	0	-	65	0
		bna-miR164b,c,d	TGGAGAAGCAGGGCACGTGCG	BnaA03g33770D	Protein CUP-SHAPED COTYLEDON 1	NAC54	GO:0005634(nucleus);GO:0003677(DNA binding);GO:0003700(sequence-specific DNA binding transcription factor activity);GO:0010160(formation of organ boundary);GO:0048467(gynoecium development);GO:0048527(lateral root development);GO:0051782(negative regulation of cell division);GO:0010072(primary shoot apical meristem specification);GO:0010223(secondary shoot formation)	-	3	1326-1346	1337	-	4	0	20
				BnaA04g09470D	NAC domain-containing protein 100	NC100	GO:0005634(nucleus);GO:0003677(DNA binding);GO:0006355(regulation of transcription, DNA-dependent);GO:0006351(transcription, DNA-dependent)	-	3.5	1001-1021	1012	1	4	65	20
				BnaA05g26240D	NAC domain-containing protein 21/22	NAC22	GO:0005634(nucleus);GO:0003677(DNA binding);GO:0003700(sequence-specific DNA binding transcription factor activity);GO:0009734(auxin mediated signaling pathway);GO:0048527(lateral root development);GO:0010072(primary shoot apical meristem specification)	-	2	3120-3140	3131	0	4	113	20
				BnaA06g37020D	Protein WEAK CHLOROPLAST MOVEMENT UNDER BLUE LIGHT-like 3	WEL3	-	ko04010(MAPK signaling pathway)	4	555-576	567	-	2	0	40
				BnaA08g00130D	NAC domain-containing protein 21/22	NAC22	GO:0005634(nucleus);GO:0003677(DNA binding);GO:0003700(sequence-specific DNA binding transcription factor activity);GO:0009734(auxin mediated signaling pathway);GO:0048527(lateral root development);GO:0010072(primary shoot apical meristem specification)	-	2	4077-4097	4088	0	-	548	0
				BnaAnng06380D	NAC domain-containing protein 100	NC100	GO:0005634(nucleus);GO:0003677(DNA binding);GO:0006355(regulation of transcription, DNA-dependent);GO:0006351(transcription, DNA-dependent)	-	1.5	1024-1044	1035	0	4	48	20
				BnaAnng07000D	NAC domain-containing protein 100	NC100	GO:0005634(nucleus);GO:0003677(DNA binding);GO:0006355(regulation of transcription, DNA-dependent);GO:0006351(transcription, DNA-dependent)	-	2	806-826	817	0	0	161	162
				BnaC02g01470D	NAC domain-containing protein 100	NC100	GO:0005634(nucleus);GO:0003677(DNA binding);GO:0006355(regulation of transcription, DNA-dependent);GO:0006351(transcription, DNA-dependent)	-	1.5	906-926	917	0	4	48	20
				BnaC03g38960D	Protein CUP-SHAPED COTYLEDON 1	NAC54	GO:0005634(nucleus);GO:0003677(DNA binding);GO:0003700(sequence-specific DNA binding transcription factor activity);GO:0010160(formation of organ boundary);GO:0048467(gynoecium development);GO:0048527(lateral root development);GO:0051782(negative regulation of cell division);GO:0010072(primary shoot apical meristem specification);GO:0010223(secondary shoot formation)	-	3	1250-1270	1261	-	4	0	20
				BnaC03g70990D	NAC domain-containing protein 21/22	NAC22	GO:0005634(nucleus);GO:0003677(DNA binding);GO:0003700(sequence-specific DNA binding transcription factor activity);GO:0009734(auxin mediated signaling pathway);GO:0048527(lateral root development);GO:0010072(primary shoot apical meristem specification)	-	2	4786-4806	4797	0	-	194	0
				BnaC04g31690D	NAC domain-containing protein 100	NC100	GO:0005634(nucleus);GO:0003677(DNA binding);GO:0006355(regulation of transcription, DNA-dependent);GO:0006351(transcription, DNA-dependent)	-	3.5	992-1012	1003	0	4	65	20
				BnaC05g40360D	NAC domain-containing protein 21/22	NAC22	GO:0005634(nucleus);GO:0003677(DNA binding);GO:0003700(sequence-specific DNA binding transcription factor activity);GO:0009734(auxin mediated signaling pathway);GO:0048527(lateral root development);GO:0010072(primary shoot apical meristem specification)	-	2	1838-1858	1849	0	4	113	20
				BnaC07g49940D	NAC domain-containing protein 100	NC100	GO:0005634(nucleus);GO:0003677(DNA binding);GO:0006355(regulation of transcription, DNA-dependent);GO:0006351(transcription, DNA-dependent)	-	2	955-975	966	0	-	65	0
		bna-MIR164b-p3,c-p3,d-p3	CACGTGTTCTACTACTCCAAC	BnaA08g13710D	-	-	-	-	3.5	48-69	60	-	4	0	20
				BnaC08g13060D	Proline-rich receptor-like protein kinase PERK2	PERK2	GO:0016021(integral to membrane);GO:0005886(plasma membrane);GO:0005524(ATP binding);GO:0004674(protein serine/threonine kinase activity);GO:0004872(receptor activity)	-	3.5	48-69	60	-	4	0	20
miR166	Con-BN	bna-MIR166a-p5	GGAATGTTGTTTGGCTCGAAG	BnaA08g21910D	Filament-like plant protein 4	FPP4	GO:0005886(plasma membrane)	-	4	683-702	693	2	-	32	0
	Con-BA-miR	aly-miR166a-5p	GGAATGTTGTCTGGCTCGAGG	BnaA01g37210D	Beta-galactosidase 1	BGAL1	GO:0048046(apoplast);GO:0009505(plant-type cell wall);GO:0009506(plasmodesma);GO:0004565(beta-galactosidase activity);GO:0043169(cation binding);GO:0005529(sugar binding);GO:0005975(carbohydrate metabolic process)	ko00052(Galactose metabolism);ko00511(Other glycan degradation);ko00600(Sphingolipid metabolism)	4	3760-3780	3771	-	4	0	20
		bna-MIR166d-p5	GGACTGTTGTCTGGCTCGAGG	BnaA10g16480D	-	-	-	-	4	3305-3325	3316	4	-	16	0
				BnaC09g39310D	-	-	-	-	3.5	3594-3614	3605	4	-	16	0
		bna-MIR166f-p5_1ss16TC	GGAATGTTGTCTGGACCGAGG	BnaA01g37210D	Beta-galactosidase 1	BGAL1	GO:0048046(apoplast);GO:0009505(plant-type cell wall);GO:0009506(plasmodesma);GO:0004565(beta-galactosidase activity);GO:0043169(cation binding);GO:0005529(sugar binding);GO:0005975(carbohydrate metabolic process)	ko00052(Galactose metabolism);ko00511(Other glycan degradation);ko00600(Sphingolipid metabolism)	3	3760-3780	3771	-	4	0	20
miR167	Con-BN	bna-miR167a_R-1,b_R-1,c	TGAAGCTGCCAGCATGATCTA	BnaA04g07950D	Auxin response factor 8	ARFH	GO:0005634(nucleus);GO:0003677(DNA binding);GO:0046983(protein dimerization activity);GO:0003700(sequence-specific DNA binding transcription factor activity);GO:0009734(auxin mediated signaling pathway);GO:0009908(flower development)	-	4	3406-3427	3417	0	0	290	485
				BnaA05g15420D	MATE efflux family protein 1	MATE1	GO:0016021(integral to membrane);GO:0005886(plasma membrane);GO:0015297(antiporter activity);GO:0015238(drug transmembrane transporter activity);GO:0005216(ion channel activity)	-	4	2327-2346	2338	2	4	19	8
				BnaA05g35760D	MATE efflux family protein 1	MATE1	GO:0016021(integral to membrane);GO:0005886(plasma membrane);GO:0015297(antiporter activity);GO:0015238(drug transmembrane transporter activity);GO:0005216(ion channel activity)	-	4	3175-3194	3186	2	4	19	8
				BnaA07g25390D	Auxin response factor 8	ARFH	GO:0005634(nucleus);GO:0003677(DNA binding);GO:0046983(protein dimerization activity);GO:0003700(sequence-specific DNA binding transcription factor activity);GO:0009734(auxin mediated signaling pathway);GO:0009908(flower development)	-	4	4008-4029	4019	0	0	774	1171
				BnaA10g25930D	Retrovirus-related Pol polyprotein from transposon TNT 1-94	POLX	GO:0004190(aspartic-type endopeptidase activity);GO:0003677(DNA binding);GO:0004519(endonuclease activity);GO:0003964(RNA-directed DNA polymerase activity);GO:0008270(zinc ion binding);GO:0015074(DNA integration)	ko00040(Pentose and glucuronate interconversions)	3.5	9492-9511	9502	-	1	0	81
				BnaC05g25120D	MATE efflux family protein 1	MATE1	GO:0016021(integral to membrane);GO:0005886(plasma membrane);GO:0015297(antiporter activity);GO:0015238(drug transmembrane transporter activity);GO:0005216(ion channel activity)	-	4	2494-2513	2505	2	4	19	8
				BnaC06g27170D	Auxin response factor 8	ARFH	GO:0005634(nucleus);GO:0003677(DNA binding);GO:0046983(protein dimerization activity);GO:0003700(sequence-specific DNA binding transcription factor activity);GO:0009734(auxin mediated signaling pathway);GO:0009908(flower development)	-	4	4085-4106	4096	0	0	774	1171
				BnaCnng25410D	Auxin response factor 8	ARFH	GO:0005634(nucleus);GO:0003677(DNA binding);GO:0046983(protein dimerization activity);GO:0003700(sequence-specific DNA binding transcription factor activity);GO:0009734(auxin mediated signaling pathway);GO:0009908(flower development)	-	4	3451-3472	3462	0	0	290	485
		bna-MIR167d-p3	AGATCATCCTGCGGCTTCATT	BnaA06g30260D	Probably inactive leucine-rich repeat receptor-like protein kinase At5g48380	Y5838	GO:0016021(integral to membrane);GO:0005886(plasma membrane);GO:0009506(plasmodesma);GO:0005524(ATP binding);GO:0004672(protein kinase activity);GO:0004872(receptor activity);GO:0033612(receptor serine/threonine kinase binding);GO:0031348(negative regulation of defense response)	-	4	315-335	326	4	-	16	0
				BnaC07g26450D	Probably inactive leucine-rich repeat receptor-like protein kinase At5g48380	Y5838	GO:0016021(integral to membrane);GO:0005886(plasma membrane);GO:0009506(plasmodesma);GO:0005524(ATP binding);GO:0004672(protein kinase activity);GO:0004872(receptor activity);GO:0033612(receptor serine/threonine kinase binding);GO:0031348(negative regulation of defense response)	-	4	1262-1282	1273	4	-	16	0
miR168	Con-BN	bna-miR168a	TCGCTTGGTGCAGGTCGGGAA	BnaA05g17460D	Protein argonaute 1	AGO1	GO:0005829(cytosol);GO:0005634(nucleus);GO:0030529(ribonucleoprotein complex);GO:0004521(endoribonuclease activity);GO:0035198(miRNA binding);GO:0035197(siRNA binding);GO:0048830(adventitious root development);GO:0009850(auxin metabolic process);GO:0009793(embryo development ending in seed dormancy);GO:0035195(gene silencing by miRNA);GO:0009965(leaf morphogenesis);GO:0006355(regulation of transc…	-	4	1273-1293	1284	0	0	943	1131
				BnaA08g03260D	Protein argonaute 1	AGO1	GO:0005829(cytosol);GO:0005634(nucleus);GO:0030529(ribonucleoprotein complex);GO:0004521(endoribonuclease activity);GO:0035198(miRNA binding);GO:0035197(siRNA binding);GO:0048830(adventitious root development);GO:0009850(auxin metabolic process);GO:0009793(embryo development ending in seed dormancy);GO:0035195(gene silencing by miRNA);GO:0009965(leaf morphogenesis);GO:0006355(regulation of transc…	-	4	912-932	923	0	0	943	1151
				BnaC05g25730D	Protein argonaute 1	AGO1	GO:0005829(cytosol);GO:0005634(nucleus);GO:0030529(ribonucleoprotein complex);GO:0004521(endoribonuclease activity);GO:0035198(miRNA binding);GO:0035197(siRNA binding);GO:0048830(adventitious root development);GO:0009850(auxin metabolic process);GO:0009793(embryo development ending in seed dormancy);GO:0035195(gene silencing by miRNA);GO:0009965(leaf morphogenesis);GO:0006355(regulation of transc…	-	4	689-709	700	0	0	943	1131
				BnaC08g02120D	Zinc finger CCCH domain-containing protein 4	C3H4	GO:0005634(nucleus);GO:0003677(DNA binding);GO:0000166(nucleotide binding);GO:0003723(RNA binding);GO:0008270(zinc ion binding);GO:0042742(defense response to bacterium)	-	4	2545-2565	2556	2	-	32	0
				BnaC08g46720D	Protein argonaute 1	AGO1	GO:0005829(cytosol);GO:0005634(nucleus);GO:0030529(ribonucleoprotein complex);GO:0004521(endoribonuclease activity);GO:0035198(miRNA binding);GO:0035197(siRNA binding);GO:0048830(adventitious root development);GO:0009850(auxin metabolic process);GO:0009793(embryo development ending in seed dormancy);GO:0035195(gene silencing by miRNA);GO:0009965(leaf morphogenesis);GO:0006355(regulation of transc…	-	4	356-376	367	0	0	943	1151
		bna-MIR168a-p3	CGGATCCCGCCTTGTATCAAG	BnaA10g16920D	Microfibrillar-associated protein 1	MFAP1	GO:0005578(proteinaceous extracellular matrix)	-	3.5	1620-1641	1632	3	3	19	34
				BnaCnng52070D	Microfibrillar-associated protein 1	MFAP1	GO:0005578(proteinaceous extracellular matrix)	-	3.5	1670-1691	1682	3	3	19	34
		bna-MIR168b-p5	CTCGGATTCGCTTGGTGCAGG	BnaA06g09970D	Clustered mitochondria protein	CLU	-	-	3.5	6828-6848	6839	-	2	0	61
	Con-BA	bra-miR168b-3p,c-3p	CCCGCCTTGCATCAACTGAAT	BnaA10g17000D	Putative F-box protein At3g16590	FB146	-	-	4	1385-1405	1396	2	-	32	0
				BnaC09g40180D	NADH--cytochrome b5 reductase 1	NB5R1	-	ko00520(Amino sugar and nucleotide sugar metabolism)	4	1323-1343	1334	2	-	32	0
		bra-miR168b-5p,c-5p	TCGCTTGGTGCAGGTCGGGAC	BnaC08g02120D	Zinc finger CCCH domain-containing protein 4	C3H4	GO:0005634(nucleus);GO:0003677(DNA binding);GO:0000166(nucleotide binding);GO:0003723(RNA binding);GO:0008270(zinc ion binding);GO:0042742(defense response to bacterium)	-	4	2545-2565	2556	2	-	32	0
miR169	Con-BN	bna-miR169a,b	CAGCCAAGGATGACTTGCCGA	BnaA02g16180D	Nuclear transcription factor Y subunit A-3	NFYA3	GO:0016602(CCAAT-binding factor complex);GO:0003677(DNA binding);GO:0003700(sequence-specific DNA binding transcription factor activity)	ko04612(Antigen processing and presentation)	4	1854-1874	1865	4	-	16	0
				BnaA10g29990D	Nuclear transcription factor Y subunit A-1	NFYA1	GO:0016602(CCAAT-binding factor complex);GO:0003677(DNA binding);GO:0003700(sequence-specific DNA binding transcription factor activity);GO:0048510(regulation of timing of transition from vegetative to reproductive phase)	-	4	2242-2262	2253	-	4	0	40
				BnaC02g21570D	Nuclear transcription factor Y subunit A-3	NFYA3	GO:0016602(CCAAT-binding factor complex);GO:0003677(DNA binding);GO:0003700(sequence-specific DNA binding transcription factor activity)	ko04612(Antigen processing and presentation)	4	1874-1894	1885	4	-	16	0
				BnaC06g06950D	Nuclear transcription factor Y subunit A-5	NFYA5	GO:0016602(CCAAT-binding factor complex);GO:0003677(DNA binding);GO:0003700(sequence-specific DNA binding transcription factor activity);GO:0009738(abscisic acid mediated signaling pathway);GO:0009785(blue light signaling pathway);GO:0045892(negative regulation of transcription, DNA-dependent);GO:0009414(response to water deprivation)	ko04612(Antigen processing and presentation)	3.5	1872-1892	1883	-	4	0	40
				BnaC09g44190D	Nuclear transcription factor Y subunit A-1	NFYA1	GO:0016602(CCAAT-binding factor complex);GO:0003677(DNA binding);GO:0003700(sequence-specific DNA binding transcription factor activity);GO:0048510(regulation of timing of transition from vegetative to reproductive phase)	-	4	2195-2215	2206	-	2	0	81
		bna-MIR169c-p3,d-p3,e-p5,i-p3	GGCAGTCTCCTTGGCTATC	BnaA03g17570D	Acetyl-coenzyme A carboxylase carboxyl transferase subunit alpha, chloroplastic	ACCA	GO:0009317(acetyl-CoA carboxylase complex);GO:0009706(chloroplast inner membrane);GO:0009570(chloroplast stroma);GO:0003989(acetyl-CoA carboxylase activity);GO:0005524(ATP binding);GO:0006633(fatty acid biosynthetic process)	ko00061(Fatty acid biosynthesis);ko00253(Tetracycline biosynthesis);ko00620(Pyruvate metabolism);ko00640(Propanoate metabolism)	3.5	2442-2460	2451	-	4	0	40
				BnaA03g54490D	Pentatricopeptide repeat-containing protein At5g42310, mitochondrial	PP413	GO:0009507(chloroplast);GO:0005739(mitochondrion);GO:0005488(binding)	-	4	1668-1687	1677	2	2	161	141
				BnaA04g00320D	60S ribosomal protein L7a-1	RL7A1	GO:0009507(chloroplast);GO:0022625(cytosolic large ribosomal subunit);GO:0005730(nucleolus);GO:0009506(plasmodesma);GO:0005774(vacuolar membrane);GO:0042254(ribosome biogenesis)	ko03010(Ribosome)	4	1324-1342	1333	-	2	0	40
				BnaA04g04780D	60S ribosomal protein L12-2	RL122	GO:0022625(cytosolic large ribosomal subunit);GO:0016020(membrane);GO:0005515(protein binding);GO:0019843(rRNA binding);GO:0003735(structural constituent of ribosome);GO:0006412(translation)	ko03010(Ribosome)	4	192-210	201	4	-	32	0
				BnaA05g22960D	-	-	-	-	4	408-425	417	2	-	32	0
				BnaA08g18080D	Uncharacterized protein At2g34160	Y2416	GO:0005829(cytosol);GO:0003676(nucleic acid binding)	-	4	1030-1047	1038	4	-	32	0
				BnaA09g10930D	-	-	-	-	3.5	214-232	223	4	-	16	0
				BnaA09g36900D	-	-	-	-	3.5	170-188	179	4	-	16	0
				BnaC04g17970D	Pentatricopeptide repeat-containing protein At5g42310, mitochondrial	PP413	GO:0009507(chloroplast);GO:0005739(mitochondrion);GO:0005488(binding)	-	4	1591-1610	1600	2	2	161	141
				BnaC04g21140D	60S ribosomal protein L7a-1	RL7A1	GO:0009507(chloroplast);GO:0022625(cytosolic large ribosomal subunit);GO:0005730(nucleolus);GO:0009506(plasmodesma);GO:0005774(vacuolar membrane);GO:0042254(ribosome biogenesis)	ko03010(Ribosome)	4	1323-1341	1332	-	2	0	40
				BnaC06g18630D	60S ribosomal protein L7a-1	RL7A1	GO:0009507(chloroplast);GO:0022625(cytosolic large ribosomal subunit);GO:0005730(nucleolus);GO:0009506(plasmodesma);GO:0005774(vacuolar membrane);GO:0042254(ribosome biogenesis)	ko03010(Ribosome)	4	1900-1918	1909	-	4	0	40
				BnaC08g28600D	-	-	-	-	3.5	84-102	93	4	-	16	0
				BnaC09g11180D	-	-	-	-	3.5	217-235	226	4	-	16	0
				BnaCnng31050D	60S ribosomal protein L12-2	RL122	GO:0022625(cytosolic large ribosomal subunit);GO:0016020(membrane);GO:0005515(protein binding);GO:0019843(rRNA binding);GO:0003735(structural constituent of ribosome);GO:0006412(translation)	ko03010(Ribosome)	4	197-215	206	3	3	43	57
		bna-miR169g_R-1,h_R-1,i_R-1,j_R-1,k_R-1	TAGCCAAGGATGACTTGCCTG	BnaA01g02050D	Uncharacterized protein At2g17340	Y2734	-	-	4	1250-1269	1260	4	-	16	0
				BnaA02g16180D	Nuclear transcription factor Y subunit A-3	NFYA3	GO:0016602(CCAAT-binding factor complex);GO:0003677(DNA binding);GO:0003700(sequence-specific DNA binding transcription factor activity)	ko04612(Antigen processing and presentation)	2.5	1854-1874	1865	4	-	16	0
				BnaA03g04040D	Nuclear transcription factor Y subunit A-1	NFYA1	GO:0016602(CCAAT-binding factor complex);GO:0003677(DNA binding);GO:0003700(sequence-specific DNA binding transcription factor activity);GO:0048510(regulation of timing of transition from vegetative to reproductive phase)	-	4	1451-1471	1462	4	2	32	81
				BnaA10g29990D	Nuclear transcription factor Y subunit A-1	NFYA1	GO:0016602(CCAAT-binding factor complex);GO:0003677(DNA binding);GO:0003700(sequence-specific DNA binding transcription factor activity);GO:0048510(regulation of timing of transition from vegetative to reproductive phase)	-	4	2242-2262	2253	-	4	0	40
				BnaAnng02740D	Nuclear transcription factor Y subunit A-2	NFYA2	GO:0005634(nucleus);GO:0003677(DNA binding);GO:0003700(sequence-specific DNA binding transcription factor activity);GO:0009567(double fertilization forming a zygote and endosperm)	-	3	1678-1698	1689	4	4	32	40
				BnaC01g03200D	Uncharacterized protein At2g17340	Y2734	-	-	3.5	1254-1273	1264	4	-	16	0
				BnaC02g21570D	Nuclear transcription factor Y subunit A-3	NFYA3	GO:0016602(CCAAT-binding factor complex);GO:0003677(DNA binding);GO:0003700(sequence-specific DNA binding transcription factor activity)	ko04612(Antigen processing and presentation)	2.5	1874-1894	1885	4	-	16	0
				BnaC06g06950D	Nuclear transcription factor Y subunit A-5	NFYA5	GO:0016602(CCAAT-binding factor complex);GO:0003677(DNA binding);GO:0003700(sequence-specific DNA binding transcription factor activity);GO:0009738(abscisic acid mediated signaling pathway);GO:0009785(blue light signaling pathway);GO:0045892(negative regulation of transcription, DNA-dependent);GO:0009414(response to water deprivation)	ko04612(Antigen processing and presentation)	2	1873-1892	1883	-	4	0	40
				BnaC09g44190D	Nuclear transcription factor Y subunit A-1	NFYA1	GO:0016602(CCAAT-binding factor complex);GO:0003677(DNA binding);GO:0003700(sequence-specific DNA binding transcription factor activity);GO:0048510(regulation of timing of transition from vegetative to reproductive phase)	-	4	2195-2215	2206	-	2	0	81
		bna-MIR169h-p3,k-p3	GGCAGTCTCCTCGGCTATT	BnaA03g41940D	UDP-glycosyltransferase 84A1	U84A1	GO:0047218(hydroxycinnamate 4-beta-glucosyltransferase activity);GO:0009636(response to toxin);GO:0010224(response to UV-B)	-	3.5	908-927	918	4	3	16	101
				BnaC07g33030D	UDP-glycosyltransferase 84A1	U84A1	GO:0047218(hydroxycinnamate 4-beta-glucosyltransferase activity);GO:0009636(response to toxin);GO:0010224(response to UV-B)	-	3.5	908-927	918	4	3	16	101
		bna-miR169m	TGAGCCAAAGATGACTTGCCG	BnaAnng02740D	Nuclear transcription factor Y subunit A-2	NFYA2	GO:0005634(nucleus);GO:0003677(DNA binding);GO:0003700(sequence-specific DNA binding transcription factor activity);GO:0009567(double fertilization forming a zygote and endosperm)	-	2	1679-1699	1690	-	0	0	162
				BnaC05g19190D	Nuclear transcription factor Y subunit A-2	NFYA2	GO:0005634(nucleus);GO:0003677(DNA binding);GO:0003700(sequence-specific DNA binding transcription factor activity);GO:0009567(double fertilization forming a zygote and endosperm)	-	1.5	1488-1508	1499	-	4	0	40
		bna-miR169n	CAGCCAAGGATGACTTGCCGG	BnaA02g16180D	Nuclear transcription factor Y subunit A-3	NFYA3	GO:0016602(CCAAT-binding factor complex);GO:0003677(DNA binding);GO:0003700(sequence-specific DNA binding transcription factor activity)	ko04612(Antigen processing and presentation)	4	1854-1874	1865	4	-	16	0
				BnaA03g04040D	Nuclear transcription factor Y subunit A-1	NFYA1	GO:0016602(CCAAT-binding factor complex);GO:0003677(DNA binding);GO:0003700(sequence-specific DNA binding transcription factor activity);GO:0048510(regulation of timing of transition from vegetative to reproductive phase)	-	3.5	1451-1471	1462	4	2	32	81
				BnaA10g29990D	Nuclear transcription factor Y subunit A-1	NFYA1	GO:0016602(CCAAT-binding factor complex);GO:0003677(DNA binding);GO:0003700(sequence-specific DNA binding transcription factor activity);GO:0048510(regulation of timing of transition from vegetative to reproductive phase)	-	3	2242-2262	2253	-	4	0	40
				BnaAnng02740D	Nuclear transcription factor Y subunit A-2	NFYA2	GO:0005634(nucleus);GO:0003677(DNA binding);GO:0003700(sequence-specific DNA binding transcription factor activity);GO:0009567(double fertilization forming a zygote and endosperm)	-	4	1678-1698	1689	4	4	32	40
				BnaC02g21570D	Nuclear transcription factor Y subunit A-3	NFYA3	GO:0016602(CCAAT-binding factor complex);GO:0003677(DNA binding);GO:0003700(sequence-specific DNA binding transcription factor activity)	ko04612(Antigen processing and presentation)	4	1874-1894	1885	4	-	16	0
				BnaC06g06950D	Nuclear transcription factor Y subunit A-5	NFYA5	GO:0016602(CCAAT-binding factor complex);GO:0003677(DNA binding);GO:0003700(sequence-specific DNA binding transcription factor activity);GO:0009738(abscisic acid mediated signaling pathway);GO:0009785(blue light signaling pathway);GO:0045892(negative regulation of transcription, DNA-dependent);GO:0009414(response to water deprivation)	ko04612(Antigen processing and presentation)	2.5	1872-1892	1883	-	4	0	40
				BnaC09g44190D	Nuclear transcription factor Y subunit A-1	NFYA1	GO:0016602(CCAAT-binding factor complex);GO:0003677(DNA binding);GO:0003700(sequence-specific DNA binding transcription factor activity);GO:0048510(regulation of timing of transition from vegetative to reproductive phase)	-	3	2195-2215	2206	-	2	0	81
	Con-BA	ath-miR169b-3p_R-1	GGCAAGTTGTCCTTCGGCTAC	BnaC08g30010D	LETM1 and EF-hand domain-containing protein 1, mitochondrial	LETM1	GO:0016021(integral to membrane);GO:0005743(mitochondrial inner membrane);GO:0005509(calcium ion binding)	-	4	3096-3117	3107	2	4	32	20
	Con-N	ath-MIR169e-p3_L+1	GCAAGTTGACTTTGGCTC	BnaA01g04100D	Poly(A) polymerase type 3 (Fragment)	PAPO3	GO:0005634(nucleus);GO:0005524(ATP binding);GO:0046872(metal ion binding);GO:0004652(polynucleotide adenylyltransferase activity);GO:0003723(RNA binding);GO:0006397(mRNA processing);GO:0043631(RNA polyadenylation);GO:0006351(transcription, DNA-dependent)	ko03018(RNA degradation)	3.5	4428-4446	4436	-	4	0	20
				BnaA02g02580D	Myb-related protein Pp1 (Fragment)	MYB1	GO:0005634(nucleus);GO:0003677(DNA binding);GO:0006355(regulation of transcription, DNA-dependent);GO:0006351(transcription, DNA-dependent)	-	3	762-779	770	4	-	5	0
				BnaA02g29770D	UPF0301 protein Tfu	Y2389	-	-	4	639-655	647	-	4	0	20
				BnaA03g05370D	Myb-related protein Pp1 (Fragment)	MYB1	GO:0005634(nucleus);GO:0003677(DNA binding);GO:0006355(regulation of transcription, DNA-dependent);GO:0006351(transcription, DNA-dependent)	-	3	276-293	284	4	-	5	0
				BnaA03g33950D	Topless-related protein 4	TPR4	GO:0005634(nucleus);GO:0005515(protein binding);GO:0006355(regulation of transcription, DNA-dependent);GO:0006351(transcription, DNA-dependent)	-	4	6345-6361	6353	-	4	0	20
				BnaA05g35260D	Probable CCR4-associated factor 1 homolog 7	CAF1G	GO:0005737(cytoplasm);GO:0005634(nucleus);GO:0046872(metal ion binding);GO:0004535(poly(A)-specific ribonuclease activity);GO:0003723(RNA binding);GO:0006355(regulation of transcription, DNA-dependent);GO:0006351(transcription, DNA-dependent)	-	4	402-419	410	-	4	0	20
				BnaA10g06080D	-		-	ko04910(Insulin signaling pathway)	4	1923-1940	1931	-	2	0	61
				BnaA10g18810D	Transcription factor MYB29	MYB29	-	-	3	413-430	421	4	-	5	0
				BnaC01g05560D	Poly(A) polymerase type 3 (Fragment)	PAPO3	GO:0005634(nucleus);GO:0005524(ATP binding);GO:0046872(metal ion binding);GO:0004652(polynucleotide adenylyltransferase activity);GO:0003723(RNA binding);GO:0006397(mRNA processing);GO:0043631(RNA polyadenylation);GO:0006351(transcription, DNA-dependent)	ko03018(RNA degradation)	3.5	4647-4665	4655	-	4	0	20
				BnaC02g05990D	Myb-related protein Pp1 (Fragment)	MYB1	GO:0005634(nucleus);GO:0003677(DNA binding);GO:0006355(regulation of transcription, DNA-dependent);GO:0006351(transcription, DNA-dependent)	-	3	1015-1032	1023	4	-	5	0
				BnaC02g37820D	UPF0301 protein Tfu	Y2389	-	-	4	652-668	660	-	4	0	20
				BnaC03g06900D	Myb-related protein Pp1 (Fragment)	MYB1	GO:0005634(nucleus);GO:0003677(DNA binding);GO:0006355(regulation of transcription, DNA-dependent);GO:0006351(transcription, DNA-dependent)	-	3	270-287	278	4	-	5	0
				BnaC03g39340D	Topless-related protein 4	TPR4	GO:0005634(nucleus);GO:0005515(protein binding);GO:0006355(regulation of transcription, DNA-dependent);GO:0006351(transcription, DNA-dependent)	-	4	6493-6509	6501	-	4	0	20
				BnaC04g12640D	Probable CCR4-associated factor 1 homolog 7	CAF1G	GO:0005737(cytoplasm);GO:0005634(nucleus);GO:0046872(metal ion binding);GO:0004535(poly(A)-specific ribonuclease activity);GO:0003723(RNA binding);GO:0006355(regulation of transcription, DNA-dependent);GO:0006351(transcription, DNA-dependent)	-	4	197-214	205	-	4	0	20
				BnaC09g26700D	-		-	ko04910(Insulin signaling pathway)	4	1923-1940	1931	-	2	0	61
				BnaC09g41540D	Protein SUPPRESSOR OF npr1-1, CONSTITUTIVE 1	SNC1	GO:0005737(cytoplasm);GO:0031224(intrinsic to membrane);GO:0005792(microsome);GO:0005634(nucleus);GO:0005524(ATP binding);GO:0017111(nucleoside-triphosphatase activity);GO:0005515(protein binding);GO:0004888(transmembrane signaling receptor activity);GO:0006915(apoptosis);GO:0042742(defense response to bacterium);GO:0009733(response to auxin stimulus);GO:0009862(systemic acquired resistance, sali…	-	4	458-475	466	2	4	97	40
				BnaC09g42570D	Transcription factor MYB39	MYB39	GO:0005634(nucleus);GO:0003677(DNA binding);GO:0006355(regulation of transcription, DNA-dependent)	-	3	426-443	434	4	-	5	0
				BnaCnng41350D	Auxin-responsive protein IAA17	IAA17	GO:0005634(nucleus);GO:0046983(protein dimerization activity);GO:0009734(auxin mediated signaling pathway);GO:0006355(regulation of transcription, DNA-dependent);GO:0006351(transcription, DNA-dependent)	-	4	2069-2085	2076	4	4	16	20
miR171	Con-BN	bna-miR171f,g	TGATTGAGCCGCGCCAATATC	BnaA03g21080D	Scarecrow-like protein 27	SCL27	GO:0005634(nucleus);GO:0051301(cell division);GO:0006355(regulation of transcription, DNA-dependent);GO:0048768(root hair cell tip growth);GO:0006351(transcription, DNA-dependent)	-	0	899-919	910	0	0	935	1050
				BnaA04g01210D	Scarecrow-like protein 22	SCL22	GO:0005634(nucleus);GO:0051301(cell division);GO:0006355(regulation of transcription, DNA-dependent);GO:0048768(root hair cell tip growth);GO:0006351(transcription, DNA-dependent)	-	0	660-680	671	2	0	661	1655
				BnaA07g01720D	Scarecrow-like protein 15	SCL15	GO:0005634(nucleus);GO:0030154(cell differentiation);GO:0006355(regulation of transcription, DNA-dependent);GO:0006351(transcription, DNA-dependent)	-	3	600-620	611	2	2	97	242
				BnaA07g37990D	Scarecrow-like protein 27	SCL27	GO:0005634(nucleus);GO:0051301(cell division);GO:0006355(regulation of transcription, DNA-dependent);GO:0048768(root hair cell tip growth);GO:0006351(transcription, DNA-dependent)	-	0	774-794	785	0	1	435	707
				BnaAnng18540D	Scarecrow-like protein 6	SCL6	GO:0005634(nucleus);GO:0005515(protein binding);GO:0051301(cell division);GO:0007623(circadian rhythm);GO:0006355(regulation of transcription, DNA-dependent);GO:0048768(root hair cell tip growth);GO:0006351(transcription, DNA-dependent)	ko04144(Endocytosis)	0	843-863	854	0	0	6209	17605
				BnaAnng18550D	Scarecrow-like protein 6	SCL6	GO:0005634(nucleus);GO:0005515(protein binding);GO:0051301(cell division);GO:0007623(circadian rhythm);GO:0006355(regulation of transcription, DNA-dependent);GO:0048768(root hair cell tip growth);GO:0006351(transcription, DNA-dependent)	-	0	832-852	843	0	0	6209	17605
				BnaC03g25140D	Scarecrow-like protein 27	SCL27	GO:0005634(nucleus);GO:0051301(cell division);GO:0006355(regulation of transcription, DNA-dependent);GO:0048768(root hair cell tip growth);GO:0006351(transcription, DNA-dependent)	-	0	949-969	960	1	0	581	969
				BnaC04g22080D	Scarecrow-like protein 22	SCL22	GO:0005634(nucleus);GO:0051301(cell division);GO:0006355(regulation of transcription, DNA-dependent);GO:0048768(root hair cell tip growth);GO:0006351(transcription, DNA-dependent)	-	0	808-828	819	0	0	3209	6824
				BnaC07g03310D	Scarecrow-like protein 15	SCL15	GO:0005634(nucleus);GO:0030154(cell differentiation);GO:0006355(regulation of transcription, DNA-dependent);GO:0006351(transcription, DNA-dependent)	-	3	602-622	613	2	2	97	242
				BnaCnng57010D	Scarecrow-like protein 27	SCL27	GO:0005634(nucleus);GO:0051301(cell division);GO:0006355(regulation of transcription, DNA-dependent);GO:0048768(root hair cell tip growth);GO:0006351(transcription, DNA-dependent)	-	0	799-819	810	1	1	435	707
		bna-miR171f,g_1ss12TC	TGATTGAGCCGCGTCAATATC	BnaA03g21080D	Scarecrow-like protein 27	SCL27	GO:0005634(nucleus);GO:0051301(cell division);GO:0006355(regulation of transcription, DNA-dependent);GO:0048768(root hair cell tip growth);GO:0006351(transcription, DNA-dependent)	-	0.5	899-919	910	0	0	935	1050
				BnaA04g01210D	Scarecrow-like protein 22	SCL22	GO:0005634(nucleus);GO:0051301(cell division);GO:0006355(regulation of transcription, DNA-dependent);GO:0048768(root hair cell tip growth);GO:0006351(transcription, DNA-dependent)	-	0.5	660-680	671	2	0	661	1655
				BnaA07g01720D	Scarecrow-like protein 15	SCL15	GO:0005634(nucleus);GO:0030154(cell differentiation);GO:0006355(regulation of transcription, DNA-dependent);GO:0006351(transcription, DNA-dependent)	-	3	600-620	611	2	2	97	242
				BnaA07g37990D	Scarecrow-like protein 27	SCL27	GO:0005634(nucleus);GO:0051301(cell division);GO:0006355(regulation of transcription, DNA-dependent);GO:0048768(root hair cell tip growth);GO:0006351(transcription, DNA-dependent)	-	0.5	774-794	785	0	1	435	707
				BnaAnng18540D	Scarecrow-like protein 6	SCL6	GO:0005634(nucleus);GO:0005515(protein binding);GO:0051301(cell division);GO:0007623(circadian rhythm);GO:0006355(regulation of transcription, DNA-dependent);GO:0048768(root hair cell tip growth);GO:0006351(transcription, DNA-dependent)	ko04144(Endocytosis)	0.5	843-863	854	0	0	6209	17605
				BnaAnng18550D	Scarecrow-like protein 6	SCL6	GO:0005634(nucleus);GO:0005515(protein binding);GO:0051301(cell division);GO:0007623(circadian rhythm);GO:0006355(regulation of transcription, DNA-dependent);GO:0048768(root hair cell tip growth);GO:0006351(transcription, DNA-dependent)	-	0.5	832-852	843	0	0	6209	17605
				BnaC03g25140D	Scarecrow-like protein 27	SCL27	GO:0005634(nucleus);GO:0051301(cell division);GO:0006355(regulation of transcription, DNA-dependent);GO:0048768(root hair cell tip growth);GO:0006351(transcription, DNA-dependent)	-	0.5	949-969	960	1	0	581	969
				BnaC04g22080D	Scarecrow-like protein 22	SCL22	GO:0005634(nucleus);GO:0051301(cell division);GO:0006355(regulation of transcription, DNA-dependent);GO:0048768(root hair cell tip growth);GO:0006351(transcription, DNA-dependent)	-	0.5	808-828	819	0	0	3209	6824
				BnaC07g03310D	Scarecrow-like protein 15	SCL15	GO:0005634(nucleus);GO:0030154(cell differentiation);GO:0006355(regulation of transcription, DNA-dependent);GO:0006351(transcription, DNA-dependent)	-	3	602-622	613	2	2	97	242
				BnaCnng57010D	Scarecrow-like protein 27	SCL27	GO:0005634(nucleus);GO:0051301(cell division);GO:0006355(regulation of transcription, DNA-dependent);GO:0048768(root hair cell tip growth);GO:0006351(transcription, DNA-dependent)	-	0.5	799-819	810	1	1	435	707
		ath-miR171-5p, bna-MIR171g-p5	TATTGGCCTGGTTCACTCAGA	BnaC04g21590D	Solanesyl diphosphate synthase 2, chloroplastic	SPS2	-	ko00900(Terpenoid backbone biosynthesis)	4	1284-1304	1295	2	2	110	89
				BnaC07g15160D	Solanesyl diphosphate synthase 2, chloroplastic	SPS2	-	ko00900(Terpenoid backbone biosynthesis)	4	1381-1401	1392	2	2	110	89
miR172	Con-BN	bna-miR172a	AGAATCTTGATGATGCTGCAT	BnaA01g34730D	Floral homeotic protein APETALA 2	AP2	GO:0005634(nucleus);GO:0003677(DNA binding);GO:0003700(sequence-specific DNA binding transcription factor activity);GO:0030154(cell differentiation);GO:0010073(meristem maintenance);GO:0048316(seed development);GO:0010093(specification of floral organ identity)	-	2	1032-1052	1043	0	0	194	202
				BnaA02g06490D	AP2-like ethylene-responsive transcription factor TOE2	TOE2	GO:0005634(nucleus);GO:0003677(DNA binding);GO:0003700(sequence-specific DNA binding transcription factor activity);GO:0009873(ethylene mediated signaling pathway)	-	1	1965-1985	1976	0	0	3322	4603
				BnaA03g22100D	Ethylene-responsive transcription factor RAP2-7	RAP27	GO:0005634(nucleus);GO:0003677(DNA binding);GO:0003700(sequence-specific DNA binding transcription factor activity);GO:0009873(ethylene mediated signaling pathway);GO:0010228(vegetative to reproductive phase transition of meristem)	-	3	2273-2293	2284	0	0	1258	626
				BnaA03g53830D	Floral homeotic protein APETALA 2	AP2	GO:0005634(nucleus);GO:0003677(DNA binding);GO:0003700(sequence-specific DNA binding transcription factor activity);GO:0030154(cell differentiation);GO:0010073(meristem maintenance);GO:0048316(seed development);GO:0010093(specification of floral organ identity)	-	2	2207-2227	2218	2	0	48	40
				BnaA05g05840D	Ribulose bisphosphate carboxylase/oxygenase activase, chloroplastic	RCA	GO:0048046(apoplast);GO:0005618(cell wall);GO:0009941(chloroplast envelope);GO:0009535(chloroplast thylakoid membrane);GO:0005634(nucleus);GO:0010287(plastoglobule);GO:0010319(stromule);GO:0043531(ADP binding);GO:0005524(ATP binding);GO:0046863(ribulose-1,5-bisphosphate carboxylase/oxygenase activator activity);GO:0042742(defense response to bacterium);GO:0010150(leaf senescence);GO:0009409(respo…	ko00630(Glyoxylate and dicarboxylate metabolism);ko00710(Carbon fixation in photosynthetic organisms)	2.5	411-431	422	2	2	274	505
				BnaA07g12050D	AP2-like ethylene-responsive transcription factor TOE3	TOE3	GO:0005634(nucleus);GO:0003677(DNA binding);GO:0003700(sequence-specific DNA binding transcription factor activity);GO:0009873(ethylene mediated signaling pathway)	-	2.5	2215-2236	2227	0	0	210	525
				BnaA07g13990D	Ethylene-responsive transcription factor RAP2-7	RAP27	GO:0005634(nucleus);GO:0003677(DNA binding);GO:0003700(sequence-specific DNA binding transcription factor activity);GO:0009873(ethylene mediated signaling pathway);GO:0010228(vegetative to reproductive phase transition of meristem)	-	3	2455-2475	2466	4	2	8	20
				BnaA10g12950D	AP2-like ethylene-responsive transcription factor TOE2	TOE2	GO:0005634(nucleus);GO:0003677(DNA binding);GO:0003700(sequence-specific DNA binding transcription factor activity);GO:0009873(ethylene mediated signaling pathway)	-	1	2922-2942	2933	0	0	3080	2039
				BnaC03g26480D	Ethylene-responsive transcription factor RAP2-7	RAP27	GO:0005634(nucleus);GO:0003677(DNA binding);GO:0003700(sequence-specific DNA binding transcription factor activity);GO:0009873(ethylene mediated signaling pathway);GO:0010228(vegetative to reproductive phase transition of meristem)	-	3	2317-2337	2328	0	0	1298	646
				BnaC03g65170D	Cysteine-rich receptor-like protein kinase 10	CRK10	GO:0016021(integral to membrane);GO:0005886(plasma membrane);GO:0005524(ATP binding);GO:0004674(protein serine/threonine kinase activity);GO:0004872(receptor activity)	ko04210(Apoptosis);ko04620(Toll-like receptor signaling pathway);ko04722(Neurotrophin signaling pathway);ko05140(Leishmaniasis);ko05142(Chagas disease)	3.5	1816-1836	1827	2	2	161	162
				BnaC04g05700D	Ribulose bisphosphate carboxylase/oxygenase activase, chloroplastic	RCA	GO:0048046(apoplast);GO:0005618(cell wall);GO:0009941(chloroplast envelope);GO:0009535(chloroplast thylakoid membrane);GO:0005634(nucleus);GO:0010287(plastoglobule);GO:0010319(stromule);GO:0043531(ADP binding);GO:0005524(ATP binding);GO:0046863(ribulose-1,5-bisphosphate carboxylase/oxygenase activator activity);GO:0042742(defense response to bacterium);GO:0010150(leaf senescence);GO:0009409(respo…	ko00630(Glyoxylate and dicarboxylate metabolism);ko00710(Carbon fixation in photosynthetic organisms)	2.5	441-461	452	2	2	306	505
				BnaC04g15640D	Ethylene-responsive transcription factor RAP2-7	RAP27	GO:0005634(nucleus);GO:0003677(DNA binding);GO:0003700(sequence-specific DNA binding transcription factor activity);GO:0009873(ethylene mediated signaling pathway);GO:0010228(vegetative to reproductive phase transition of meristem)	-	3	2403-2423	2414	4	2	8	20
				BnaC07g16190D	AP2-like ethylene-responsive transcription factor TOE3	TOE3	GO:0005634(nucleus);GO:0003677(DNA binding);GO:0003700(sequence-specific DNA binding transcription factor activity);GO:0009873(ethylene mediated signaling pathway)	-	3	2174-2194	2185	0	0	210	525
				BnaC09g13430D	Ethylene-responsive transcription factor RAP2-7	RAP27	GO:0005634(nucleus);GO:0003677(DNA binding);GO:0003700(sequence-specific DNA binding transcription factor activity);GO:0009873(ethylene mediated signaling pathway);GO:0010228(vegetative to reproductive phase transition of meristem)	-	3	1028-1048	1039	4	1	8	20
				BnaC09g35430D	AP2-like ethylene-responsive transcription factor TOE2	TOE2	GO:0005634(nucleus);GO:0003677(DNA binding);GO:0003700(sequence-specific DNA binding transcription factor activity);GO:0009873(ethylene mediated signaling pathway)	-	1	2660-2680	2671	0	0	2919	2039
				BnaCnng39690D	Floral homeotic protein APETALA 2	AP2	GO:0005634(nucleus);GO:0003677(DNA binding);GO:0003700(sequence-specific DNA binding transcription factor activity);GO:0030154(cell differentiation);GO:0010073(meristem maintenance);GO:0048316(seed development);GO:0010093(specification of floral organ identity)	-	2	2222-2242	2233	0	1	48	40
				BnaCnng71740D	Floral homeotic protein APETALA 2	AP2	GO:0005634(nucleus);GO:0003677(DNA binding);GO:0003700(sequence-specific DNA binding transcription factor activity);GO:0030154(cell differentiation);GO:0010073(meristem maintenance);GO:0048316(seed development);GO:0010093(specification of floral organ identity)	-	2	1030-1050	1041	0	0	194	202
		bna-miR172b,c	GGAATCTTGATGATGCTGCAT	BnaA01g34730D	Floral homeotic protein APETALA 2	AP2	GO:0005634(nucleus);GO:0003677(DNA binding);GO:0003700(sequence-specific DNA binding transcription factor activity);GO:0030154(cell differentiation);GO:0010073(meristem maintenance);GO:0048316(seed development);GO:0010093(specification of floral organ identity)	-	2.5	1032-1052	1043	0	0	194	202
				BnaA02g06490D	AP2-like ethylene-responsive transcription factor TOE2	TOE2	GO:0005634(nucleus);GO:0003677(DNA binding);GO:0003700(sequence-specific DNA binding transcription factor activity);GO:0009873(ethylene mediated signaling pathway)	-	1.5	1965-1985	1976	0	0	3322	4603
				BnaA03g22100D	Ethylene-responsive transcription factor RAP2-7	RAP27	GO:0005634(nucleus);GO:0003677(DNA binding);GO:0003700(sequence-specific DNA binding transcription factor activity);GO:0009873(ethylene mediated signaling pathway);GO:0010228(vegetative to reproductive phase transition of meristem)	-	3.5	2273-2293	2284	0	0	1258	626
				BnaA03g53830D	Floral homeotic protein APETALA 2	AP2	GO:0005634(nucleus);GO:0003677(DNA binding);GO:0003700(sequence-specific DNA binding transcription factor activity);GO:0030154(cell differentiation);GO:0010073(meristem maintenance);GO:0048316(seed development);GO:0010093(specification of floral organ identity)	-	2.5	2207-2227	2218	2	0	48	40
				BnaA05g05840D	Ribulose bisphosphate carboxylase/oxygenase activase, chloroplastic	RCA	GO:0048046(apoplast);GO:0005618(cell wall);GO:0009941(chloroplast envelope);GO:0009535(chloroplast thylakoid membrane);GO:0005634(nucleus);GO:0010287(plastoglobule);GO:0010319(stromule);GO:0043531(ADP binding);GO:0005524(ATP binding);GO:0046863(ribulose-1,5-bisphosphate carboxylase/oxygenase activator activity);GO:0042742(defense response to bacterium);GO:0010150(leaf senescence);GO:0009409(respo…	ko00630(Glyoxylate and dicarboxylate metabolism);ko00710(Carbon fixation in photosynthetic organisms)	3	411-431	422	2	2	274	505
				BnaA07g12050D	AP2-like ethylene-responsive transcription factor TOE3	TOE3	GO:0005634(nucleus);GO:0003677(DNA binding);GO:0003700(sequence-specific DNA binding transcription factor activity);GO:0009873(ethylene mediated signaling pathway)	-	3	2215-2236	2227	0	0	210	525
				BnaA07g13990D	Ethylene-responsive transcription factor RAP2-7	RAP27	GO:0005634(nucleus);GO:0003677(DNA binding);GO:0003700(sequence-specific DNA binding transcription factor activity);GO:0009873(ethylene mediated signaling pathway);GO:0010228(vegetative to reproductive phase transition of meristem)	-	3.5	2455-2475	2466	4	2	8	20
				BnaA10g12950D	AP2-like ethylene-responsive transcription factor TOE2	TOE2	GO:0005634(nucleus);GO:0003677(DNA binding);GO:0003700(sequence-specific DNA binding transcription factor activity);GO:0009873(ethylene mediated signaling pathway)	-	1.5	2922-2942	2933	0	0	3080	2039
				BnaC03g26480D	Ethylene-responsive transcription factor RAP2-7	RAP27	GO:0005634(nucleus);GO:0003677(DNA binding);GO:0003700(sequence-specific DNA binding transcription factor activity);GO:0009873(ethylene mediated signaling pathway);GO:0010228(vegetative to reproductive phase transition of meristem)	-	3.5	2317-2337	2328	0	0	1298	646
				BnaC03g65170D	Cysteine-rich receptor-like protein kinase 10	CRK10	GO:0016021(integral to membrane);GO:0005886(plasma membrane);GO:0005524(ATP binding);GO:0004674(protein serine/threonine kinase activity);GO:0004872(receptor activity)	ko04210(Apoptosis);ko04620(Toll-like receptor signaling pathway);ko04722(Neurotrophin signaling pathway);ko05140(Leishmaniasis);ko05142(Chagas disease)	3.5	1816-1836	1827	2	2	161	162
				BnaC04g05700D	Ribulose bisphosphate carboxylase/oxygenase activase, chloroplastic	RCA	GO:0048046(apoplast);GO:0005618(cell wall);GO:0009941(chloroplast envelope);GO:0009535(chloroplast thylakoid membrane);GO:0005634(nucleus);GO:0010287(plastoglobule);GO:0010319(stromule);GO:0043531(ADP binding);GO:0005524(ATP binding);GO:0046863(ribulose-1,5-bisphosphate carboxylase/oxygenase activator activity);GO:0042742(defense response to bacterium);GO:0010150(leaf senescence);GO:0009409(respo…	ko00630(Glyoxylate and dicarboxylate metabolism);ko00710(Carbon fixation in photosynthetic organisms)	3	441-461	452	2	2	306	505
				BnaC04g15640D	Ethylene-responsive transcription factor RAP2-7	RAP27	GO:0005634(nucleus);GO:0003677(DNA binding);GO:0003700(sequence-specific DNA binding transcription factor activity);GO:0009873(ethylene mediated signaling pathway);GO:0010228(vegetative to reproductive phase transition of meristem)	-	3.5	2403-2423	2414	4	2	8	20
				BnaC07g16190D	AP2-like ethylene-responsive transcription factor TOE3	TOE3	GO:0005634(nucleus);GO:0003677(DNA binding);GO:0003700(sequence-specific DNA binding transcription factor activity);GO:0009873(ethylene mediated signaling pathway)	-	3.5	2174-2194	2185	0	0	210	525
				BnaC07g30850D	-	-	-	-	4	456-476	467	4	-	16	0
				BnaC09g13430D	Ethylene-responsive transcription factor RAP2-7	RAP27	GO:0005634(nucleus);GO:0003677(DNA binding);GO:0003700(sequence-specific DNA binding transcription factor activity);GO:0009873(ethylene mediated signaling pathway);GO:0010228(vegetative to reproductive phase transition of meristem)	-	3.5	1028-1048	1039	4	1	8	20
				BnaC09g35430D	AP2-like ethylene-responsive transcription factor TOE2	TOE2	GO:0005634(nucleus);GO:0003677(DNA binding);GO:0003700(sequence-specific DNA binding transcription factor activity);GO:0009873(ethylene mediated signaling pathway)	-	1.5	2660-2680	2671	0	0	2919	2039
				BnaCnng39690D	Floral homeotic protein APETALA 2	AP2	GO:0005634(nucleus);GO:0003677(DNA binding);GO:0003700(sequence-specific DNA binding transcription factor activity);GO:0030154(cell differentiation);GO:0010073(meristem maintenance);GO:0048316(seed development);GO:0010093(specification of floral organ identity)	-	2.5	2222-2242	2233	0	1	48	40
				BnaCnng71740D	Floral homeotic protein APETALA 2	AP2	GO:0005634(nucleus);GO:0003677(DNA binding);GO:0003700(sequence-specific DNA binding transcription factor activity);GO:0030154(cell differentiation);GO:0010073(meristem maintenance);GO:0048316(seed development);GO:0010093(specification of floral organ identity)	-	2.5	1030-1050	1041	0	0	194	202
		bna-miR172a_R-1,d_R-1	AGAATCTTGATGATGCTGCA	BnaA01g34730D	Floral homeotic protein APETALA 2	AP2	GO:0005634(nucleus);GO:0003677(DNA binding);GO:0003700(sequence-specific DNA binding transcription factor activity);GO:0030154(cell differentiation);GO:0010073(meristem maintenance);GO:0048316(seed development);GO:0010093(specification of floral organ identity)	-	1	1033-1052	1043	0	0	194	202
				BnaA02g06490D	AP2-like ethylene-responsive transcription factor TOE2	TOE2	GO:0005634(nucleus);GO:0003677(DNA binding);GO:0003700(sequence-specific DNA binding transcription factor activity);GO:0009873(ethylene mediated signaling pathway)	-	1	1966-1985	1976	0	0	3322	4603
				BnaA03g22100D	Ethylene-responsive transcription factor RAP2-7	RAP27	GO:0005634(nucleus);GO:0003677(DNA binding);GO:0003700(sequence-specific DNA binding transcription factor activity);GO:0009873(ethylene mediated signaling pathway);GO:0010228(vegetative to reproductive phase transition of meristem)	-	2	2274-2293	2284	0	0	1258	626
				BnaA03g53830D	Floral homeotic protein APETALA 2	AP2	GO:0005634(nucleus);GO:0003677(DNA binding);GO:0003700(sequence-specific DNA binding transcription factor activity);GO:0030154(cell differentiation);GO:0010073(meristem maintenance);GO:0048316(seed development);GO:0010093(specification of floral organ identity)	-	1	2208-2227	2218	2	0	48	40
				BnaA05g05840D	Ribulose bisphosphate carboxylase/oxygenase activase, chloroplastic	RCA	GO:0048046(apoplast);GO:0005618(cell wall);GO:0009941(chloroplast envelope);GO:0009535(chloroplast thylakoid membrane);GO:0005634(nucleus);GO:0010287(plastoglobule);GO:0010319(stromule);GO:0043531(ADP binding);GO:0005524(ATP binding);GO:0046863(ribulose-1,5-bisphosphate carboxylase/oxygenase activator activity);GO:0042742(defense response to bacterium);GO:0010150(leaf senescence);GO:0009409(respo…	ko00630(Glyoxylate and dicarboxylate metabolism);ko00710(Carbon fixation in photosynthetic organisms)	1.5	412-431	422	2	2	274	505
				BnaA07g12050D	AP2-like ethylene-responsive transcription factor TOE3	TOE3	GO:0005634(nucleus);GO:0003677(DNA binding);GO:0003700(sequence-specific DNA binding transcription factor activity);GO:0009873(ethylene mediated signaling pathway)	-	2.5	2217-2236	2227	0	0	210	525
				BnaA07g13990D	Ethylene-responsive transcription factor RAP2-7	RAP27	GO:0005634(nucleus);GO:0003677(DNA binding);GO:0003700(sequence-specific DNA binding transcription factor activity);GO:0009873(ethylene mediated signaling pathway);GO:0010228(vegetative to reproductive phase transition of meristem)	-	2	2456-2475	2466	4	2	8	20
				BnaA10g12950D	AP2-like ethylene-responsive transcription factor TOE2	TOE2	GO:0005634(nucleus);GO:0003677(DNA binding);GO:0003700(sequence-specific DNA binding transcription factor activity);GO:0009873(ethylene mediated signaling pathway)	-	1	2923-2942	2933	0	0	3080	2039
				BnaAnng07150D	-	-	-	-	3.5	382-400	391	2	-	65	0
				BnaC03g26480D	Ethylene-responsive transcription factor RAP2-7	RAP27	GO:0005634(nucleus);GO:0003677(DNA binding);GO:0003700(sequence-specific DNA binding transcription factor activity);GO:0009873(ethylene mediated signaling pathway);GO:0010228(vegetative to reproductive phase transition of meristem)	-	2	2318-2337	2328	0	0	1298	646
				BnaC03g60080D	Transcription repressor MYB4	MYB4	GO:0005634(nucleus);GO:0003677(DNA binding);GO:0045892(negative regulation of transcription, DNA-dependent);GO:0009753(response to jasmonic acid stimulus);GO:0009751(response to salicylic acid stimulus);GO:0010224(response to UV-B);GO:0006351(transcription, DNA-dependent)	-	4	1040-1058	1049	-	4	0	13
				BnaC03g65170D	Cysteine-rich receptor-like protein kinase 10	CRK10	GO:0016021(integral to membrane);GO:0005886(plasma membrane);GO:0005524(ATP binding);GO:0004674(protein serine/threonine kinase activity);GO:0004872(receptor activity)	ko04210(Apoptosis);ko04620(Toll-like receptor signaling pathway);ko04722(Neurotrophin signaling pathway);ko05140(Leishmaniasis);ko05142(Chagas disease)	3.5	1817-1836	1827	2	2	161	162
				BnaC04g05700D	Ribulose bisphosphate carboxylase/oxygenase activase, chloroplastic	RCA	GO:0048046(apoplast);GO:0005618(cell wall);GO:0009941(chloroplast envelope);GO:0009535(chloroplast thylakoid membrane);GO:0005634(nucleus);GO:0010287(plastoglobule);GO:0010319(stromule);GO:0043531(ADP binding);GO:0005524(ATP binding);GO:0046863(ribulose-1,5-bisphosphate carboxylase/oxygenase activator activity);GO:0042742(defense response to bacterium);GO:0010150(leaf senescence);GO:0009409(respo…	ko00630(Glyoxylate and dicarboxylate metabolism);ko00710(Carbon fixation in photosynthetic organisms)	1.5	442-461	452	2	2	306	505
				BnaC04g15640D	Ethylene-responsive transcription factor RAP2-7	RAP27	GO:0005634(nucleus);GO:0003677(DNA binding);GO:0003700(sequence-specific DNA binding transcription factor activity);GO:0009873(ethylene mediated signaling pathway);GO:0010228(vegetative to reproductive phase transition of meristem)	-	2	2404-2423	2414	4	2	8	20
				BnaC05g46800D	-	-	-	-	4	280-299	290	-	4	0	40
				BnaC07g16190D	AP2-like ethylene-responsive transcription factor TOE3	TOE3	GO:0005634(nucleus);GO:0003677(DNA binding);GO:0003700(sequence-specific DNA binding transcription factor activity);GO:0009873(ethylene mediated signaling pathway)	-	2	2175-2194	2185	0	0	210	525
				BnaC07g38010D	Cysteine-rich receptor-like protein kinase 10	CRK10	GO:0016021(integral to membrane);GO:0005886(plasma membrane);GO:0005524(ATP binding);GO:0004674(protein serine/threonine kinase activity);GO:0004872(receptor activity)	-	3.5	1771-1790	1781	4	-	8	0
				BnaC09g13430D	Ethylene-responsive transcription factor RAP2-7	RAP27	GO:0005634(nucleus);GO:0003677(DNA binding);GO:0003700(sequence-specific DNA binding transcription factor activity);GO:0009873(ethylene mediated signaling pathway);GO:0010228(vegetative to reproductive phase transition of meristem)	-	2	1029-1048	1039	4	1	8	20
				BnaC09g20820D	Protein VAC14 homolog	VAC14	-	-	4	4435-4454	4445	-	4	0	20
				BnaC09g35430D	AP2-like ethylene-responsive transcription factor TOE2	TOE2	GO:0005634(nucleus);GO:0003677(DNA binding);GO:0003700(sequence-specific DNA binding transcription factor activity);GO:0009873(ethylene mediated signaling pathway)	-	1	2661-2680	2671	0	0	2919	2039
				BnaCnng23360D	Transcription repressor MYB4	MYB4	GO:0005634(nucleus);GO:0003677(DNA binding);GO:0045892(negative regulation of transcription, DNA-dependent);GO:0009753(response to jasmonic acid stimulus);GO:0009751(response to salicylic acid stimulus);GO:0010224(response to UV-B);GO:0006351(transcription, DNA-dependent)	-	4	544-562	553	-	4	0	13
				BnaCnng39690D	Floral homeotic protein APETALA 2	AP2	GO:0005634(nucleus);GO:0003677(DNA binding);GO:0003700(sequence-specific DNA binding transcription factor activity);GO:0030154(cell differentiation);GO:0010073(meristem maintenance);GO:0048316(seed development);GO:0010093(specification of floral organ identity)	-	1	2223-2242	2233	0	1	48	40
				BnaCnng71740D	Floral homeotic protein APETALA 2	AP2	GO:0005634(nucleus);GO:0003677(DNA binding);GO:0003700(sequence-specific DNA binding transcription factor activity);GO:0030154(cell differentiation);GO:0010073(meristem maintenance);GO:0048316(seed development);GO:0010093(specification of floral organ identity)	-	1	1031-1050	1041	0	0	194	202
	Con-BA	bra-miR172b-5p, ath-miR172e-5p_R+1	GCAGCACCATTAAGATTCACA	BnaA10g29400D	Proline-rich receptor-like protein kinase PERK8	PERK8	GO:0016021(integral to membrane);GO:0005886(plasma membrane);GO:0005524(ATP binding);GO:0004674(protein serine/threonine kinase activity);GO:0005199(structural constituent of cell wall)	-	4	906-926	917	-	4	0	40
		aly-MIR172a-p5_1ss2CT	GTTGTTTGCTGCTGTGGCATC	BnaA10g04750D	Josephin-like protein	JOSL	GO:0000166(nucleotide binding);GO:0008242(omega peptidase activity)	-	4	413-432	424	-	2	0	27
miR319	Con-BA	bra-miR319-3p, ath-miR319a,b, aly-miR319a-3p,b-3p	TTGGACTGAAGGGAGCTCCCT	BnaA01g29050D	Transcription factor TCP3	TCP3	GO:0005634(nucleus);GO:0003677(DNA binding);GO:0048366(leaf development);GO:0006355(regulation of transcription, DNA-dependent);GO:0009733(response to auxin stimulus);GO:0006351(transcription, DNA-dependent)	-	3.5	1080-1101	1092	4	-	11	0
				BnaA05g24520D	Transcription factor TCP4	TCP4	GO:0005634(nucleus);GO:0003677(DNA binding);GO:0009793(embryo development ending in seed dormancy);GO:0048366(leaf development);GO:0006355(regulation of transcription, DNA-dependent);GO:0006351(transcription, DNA-dependent)	-	3.5	918-939	930	3	2	27	40
				BnaC01g40850D	Transcription factor TCP2	TCP2	GO:0005634(nucleus);GO:0003677(DNA binding);GO:0048366(leaf development);GO:0006355(regulation of transcription, DNA-dependent);GO:0006351(transcription, DNA-dependent)	-	2.5	2072-2091	2082	-	4	0	40
				BnaCnng49390D	Transcription factor GAMYB	GAM1	GO:0005634(nucleus);GO:0003677(DNA binding);GO:0030154(cell differentiation);GO:0009908(flower development);GO:0006355(regulation of transcription, DNA-dependent);GO:0006351(transcription, DNA-dependent)	-	4	1053-1073	1064	-	4	0	40
				BnaCnng59700D	Transcription factor TCP4	TCP4	GO:0005634(nucleus);GO:0003677(DNA binding);GO:0009793(embryo development ending in seed dormancy);GO:0048366(leaf development);GO:0006355(regulation of transcription, DNA-dependent);GO:0006351(transcription, DNA-dependent)	-	3.5	911-932	923	3	2	27	40
		ath-miR319c, aly-miR319d-3p	TTGGACTGAAGGGAGCTCCTT	BnaA01g29050D	Transcription factor TCP3	TCP3	GO:0005634(nucleus);GO:0003677(DNA binding);GO:0048366(leaf development);GO:0006355(regulation of transcription, DNA-dependent);GO:0009733(response to auxin stimulus);GO:0006351(transcription, DNA-dependent)	-	3	1081-1101	1092	4	-	11	0
				BnaA05g24520D	Transcription factor TCP4	TCP4	GO:0005634(nucleus);GO:0003677(DNA binding);GO:0009793(embryo development ending in seed dormancy);GO:0048366(leaf development);GO:0006355(regulation of transcription, DNA-dependent);GO:0006351(transcription, DNA-dependent)	-	3	919-939	930	3	2	27	40
				BnaA06g18980D	Beta-glucosidase 15	BGL15	GO:0009505(plant-type cell wall);GO:0009506(plasmodesma);GO:0008422(beta-glucosidase activity);GO:0043169(cation binding);GO:0005975(carbohydrate metabolic process)	ko00460(Cyanoamino acid metabolism);ko00500(Starch and sucrose metabolism);ko00940(Phenylpropanoid biosynthesis)	3.5	2011-2031	2022	2	2	97	81
				BnaC01g40850D	Transcription factor TCP2	TCP2	GO:0005634(nucleus);GO:0003677(DNA binding);GO:0048366(leaf development);GO:0006355(regulation of transcription, DNA-dependent);GO:0006351(transcription, DNA-dependent)	-	3.5	2071-2091	2082	-	4	0	40
				BnaCnng49390D	Transcription factor GAMYB	GAM1	GO:0005634(nucleus);GO:0003677(DNA binding);GO:0030154(cell differentiation);GO:0009908(flower development);GO:0006355(regulation of transcription, DNA-dependent);GO:0006351(transcription, DNA-dependent)	-	4	1053-1073	1064	-	4	0	40
				BnaCnng59700D	Transcription factor TCP4	TCP4	GO:0005634(nucleus);GO:0003677(DNA binding);GO:0009793(embryo development ending in seed dormancy);GO:0048366(leaf development);GO:0006355(regulation of transcription, DNA-dependent);GO:0006351(transcription, DNA-dependent)	-	3	912-932	923	3	2	27	40
miR390	Con-BN	bna-miR390a,b,c	AAGCTCAGGAGGGATAGCGCC	BnaA08g23940D	PHD finger protein ALFIN-LIKE 7	ALFL7	GO:0005634(nucleus);GO:0035064(methylated histone residue binding);GO:0008270(zinc ion binding);GO:0016568(chromatin modification);GO:0006355(regulation of transcription, DNA-dependent);GO:0006351(transcription, DNA-dependent)	-	4	750-770	761	-	2	0	61
				BnaC08g16190D	PHD finger protein ALFIN-LIKE 7	ALFL7	GO:0005634(nucleus);GO:0035064(methylated histone residue binding);GO:0008270(zinc ion binding);GO:0016568(chromatin modification);GO:0006355(regulation of transcription, DNA-dependent);GO:0006351(transcription, DNA-dependent)	-	3.5	847-867	858	-	2	0	61
miR391	Con-BA	bra-miR391-3p	ACGGTATCTCTCCTACGTAGC	BnaC06g01120D	Dof zinc finger protein DOF1.6	DOF16	GO:0005634(nucleus);GO:0003677(DNA binding);GO:0008270(zinc ion binding);GO:0006355(regulation of transcription, DNA-dependent);GO:0006351(transcription, DNA-dependent)	-	3	545-565	556	4	-	11	0
				BnaC08g04350D	Dof zinc finger protein DOF1.6	DOF16	GO:0005634(nucleus);GO:0003677(DNA binding);GO:0008270(zinc ion binding);GO:0006355(regulation of transcription, DNA-dependent);GO:0006351(transcription, DNA-dependent)	-	4	202-222	213	4	-	11	0
		bra-miR391-5p	TTCGCAGGAGAGATAGCGCCA	BnaA01g07100D	Calcium-transporting ATPase 10, plasma membrane-type	ACA10	GO:0016021(integral to membrane);GO:0005886(plasma membrane);GO:0009506(plasmodesma);GO:0005524(ATP binding);GO:0005388(calcium-transporting ATPase activity);GO:0005516(calmodulin binding);GO:0046872(metal ion binding);GO:0006754(ATP biosynthetic process)	-	2.5	627-647	638	0	0	258	323
				BnaA02g08330D	Calcium-transporting ATPase 8, plasma membrane-type	ACA8	GO:0016021(integral to membrane);GO:0005886(plasma membrane);GO:0009506(plasmodesma);GO:0005524(ATP binding);GO:0005388(calcium-transporting ATPase activity);GO:0005516(calmodulin binding);GO:0046872(metal ion binding);GO:0043621(protein self-association);GO:0006754(ATP biosynthetic process);GO:0009624(response to nematode)	-	3	577-597	588	1	0	226	1171
				BnaAnng07140D	-	-	-	-	4	79-100	91	4	-	32	0
				BnaC01g08580D	Calcium-transporting ATPase 10, plasma membrane-type	ACA10	GO:0016021(integral to membrane);GO:0005886(plasma membrane);GO:0009506(plasmodesma);GO:0005524(ATP binding);GO:0005388(calcium-transporting ATPase activity);GO:0005516(calmodulin binding);GO:0046872(metal ion binding);GO:0006754(ATP biosynthetic process)	-	2.5	561-581	572	0	0	258	323
				BnaC06g36680D	RNA pseudourine synthase 2, chloroplastic	PUS2	GO:0009507(chloroplast);GO:0009982(pseudouridine synthase activity);GO:0003723(RNA binding);GO:0001522(pseudouridine synthesis)	-	4	1468-1489	1479	4	-	16	0
				BnaC07g42210D	Calcium-transporting ATPase 10, plasma membrane-type	ACA10	GO:0016021(integral to membrane);GO:0005886(plasma membrane);GO:0009506(plasmodesma);GO:0005524(ATP binding);GO:0005388(calcium-transporting ATPase activity);GO:0005516(calmodulin binding);GO:0046872(metal ion binding);GO:0006754(ATP biosynthetic process)	-	4	620-640	631	0	0	2258	4401
miR393	Con-BN	bna-miR393_R+1	TCCAAAGGGATCGCATTGATCC	BnaA01g23600D	Transcription factor bHLH77	BH077	GO:0005634(nucleus);GO:0003677(DNA binding);GO:0006355(regulation of transcription, DNA-dependent);GO:0006351(transcription, DNA-dependent)	-	3	371-392	383	0	0	258	1131
				BnaA02g28290D	Protein AUXIN SIGNALING F-BOX 2	AFB2	GO:0005634(nucleus);GO:0019005(SCF ubiquitin ligase complex);GO:0005774(vacuolar membrane);GO:0010011(auxin binding);GO:0000822(inositol hexakisphosphate binding);GO:0009734(auxin mediated signaling pathway);GO:0006952(defense response);GO:0007275(multicellular organismal development);GO:0002237(response to molecule of bacterial origin)	-	2	2519-2540	2531	0	0	1177	2059
				BnaA03g25790D	GRR1-like protein 1	GRH1	GO:0043224(nuclear SCF ubiquitin ligase complex);GO:0010011(auxin binding);GO:0000822(inositol hexakisphosphate binding);GO:0005515(protein binding);GO:0009734(auxin mediated signaling pathway);GO:0006952(defense response);GO:0045014(negative regulation of transcription by glucose);GO:0002237(response to molecule of bacterial origin);GO:0048443(stamen development)	-	4	2322-2343	2334	0	0	242	525
				BnaA04g00230D	Protein TRANSPORT INHIBITOR RESPONSE 1	TIR1	GO:0005634(nucleus);GO:0019005(SCF ubiquitin ligase complex);GO:0010011(auxin binding);GO:0000822(inositol hexakisphosphate binding);GO:0005515(protein binding);GO:0004842(ubiquitin-protein ligase activity);GO:0009734(auxin mediated signaling pathway);GO:0007049(cell cycle);GO:0016036(cellular response to phosphate starvation);GO:0006952(defense response);GO:0009873(ethylene mediated signaling pa…	-	3	2255-2277	2268	0	0	6497	18130
				BnaA07g19520D	Protein TRANSPORT INHIBITOR RESPONSE 1	TIR1	GO:0005634(nucleus);GO:0019005(SCF ubiquitin ligase complex);GO:0010011(auxin binding);GO:0000822(inositol hexakisphosphate binding);GO:0005515(protein binding);GO:0004842(ubiquitin-protein ligase activity);GO:0009734(auxin mediated signaling pathway);GO:0007049(cell cycle);GO:0016036(cellular response to phosphate starvation);GO:0006952(defense response);GO:0009873(ethylene mediated signaling pa…	-	3	2800-2822	2813	0	0	2405	7387
				BnaA08g24570D	Protein AUXIN SIGNALING F-BOX 3	AFB3	GO:0005634(nucleus);GO:0019005(SCF ubiquitin ligase complex);GO:0010011(auxin binding);GO:0000822(inositol hexakisphosphate binding);GO:0009734(auxin mediated signaling pathway);GO:0071249(cellular response to nitrate);GO:0006952(defense response);GO:0048527(lateral root development);GO:0080022(primary root development);GO:0002237(response to molecule of bacterial origin)	-	2	2628-2649	2640	0	0	1669	3886
				BnaA09g01370D	GRR1-like protein 1	GRH1	GO:0043224(nuclear SCF ubiquitin ligase complex);GO:0010011(auxin binding);GO:0000822(inositol hexakisphosphate binding);GO:0005515(protein binding);GO:0009734(auxin mediated signaling pathway);GO:0006952(defense response);GO:0045014(negative regulation of transcription by glucose);GO:0002237(response to molecule of bacterial origin);GO:0048443(stamen development)	-	3	2656-2677	2668	-	4	0	20
				BnaA09g40340D	Protein TRANSPORT INHIBITOR RESPONSE 1	TIR1	GO:0005634(nucleus);GO:0019005(SCF ubiquitin ligase complex);GO:0010011(auxin binding);GO:0000822(inositol hexakisphosphate binding);GO:0005515(protein binding);GO:0004842(ubiquitin-protein ligase activity);GO:0009734(auxin mediated signaling pathway);GO:0007049(cell cycle);GO:0016036(cellular response to phosphate starvation);GO:0006952(defense response);GO:0009873(ethylene mediated signaling pa…	-	3	2335-2357	2348	0	0	2316	7327
				BnaC02g36370D	Protein AUXIN SIGNALING F-BOX 2	AFB2	GO:0005634(nucleus);GO:0019005(SCF ubiquitin ligase complex);GO:0005774(vacuolar membrane);GO:0010011(auxin binding);GO:0000822(inositol hexakisphosphate binding);GO:0009734(auxin mediated signaling pathway);GO:0006952(defense response);GO:0007275(multicellular organismal development);GO:0002237(response to molecule of bacterial origin)	-	2	2579-2600	2591	0	0	1177	2059
				BnaC03g73110D	GRR1-like protein 1	GRH1	GO:0043224(nuclear SCF ubiquitin ligase complex);GO:0010011(auxin binding);GO:0000822(inositol hexakisphosphate binding);GO:0005515(protein binding);GO:0009734(auxin mediated signaling pathway);GO:0006952(defense response);GO:0045014(negative regulation of transcription by glucose);GO:0002237(response to molecule of bacterial origin);GO:0048443(stamen development)	-	4	2358-2379	2370	0	0	242	525
				BnaC06g43000D	Protein TRANSPORT INHIBITOR RESPONSE 1	TIR1	GO:0005634(nucleus);GO:0019005(SCF ubiquitin ligase complex);GO:0010011(auxin binding);GO:0000822(inositol hexakisphosphate binding);GO:0005515(protein binding);GO:0004842(ubiquitin-protein ligase activity);GO:0009734(auxin mediated signaling pathway);GO:0007049(cell cycle);GO:0016036(cellular response to phosphate starvation);GO:0006952(defense response);GO:0009873(ethylene mediated signaling pa…	-	3	2070-2092	2083	0	0	2405	7387
				BnaC07g07840D	Transcription factor bHLH76	BH076	GO:0005634(nucleus);GO:0003677(DNA binding);GO:0009911(positive regulation of flower development);GO:0006355(regulation of transcription, DNA-dependent);GO:0006351(transcription, DNA-dependent)	-	3	308-329	320	0	0	129	404
				BnaC08g15770D	Protein AUXIN SIGNALING F-BOX 3	AFB3	GO:0005634(nucleus);GO:0019005(SCF ubiquitin ligase complex);GO:0010011(auxin binding);GO:0000822(inositol hexakisphosphate binding);GO:0009734(auxin mediated signaling pathway);GO:0071249(cellular response to nitrate);GO:0006952(defense response);GO:0048527(lateral root development);GO:0080022(primary root development);GO:0002237(response to molecule of bacterial origin)	-	2	2405-2426	2417	0	0	1669	3886
				BnaC08g29060D	Protein AUXIN SIGNALING F-BOX 3	AFB3	GO:0005634(nucleus);GO:0019005(SCF ubiquitin ligase complex);GO:0010011(auxin binding);GO:0000822(inositol hexakisphosphate binding);GO:0009734(auxin mediated signaling pathway);GO:0071249(cellular response to nitrate);GO:0006952(defense response);GO:0048527(lateral root development);GO:0080022(primary root development);GO:0002237(response to molecule of bacterial origin)	-	2	2424-2445	2436	0	0	1669	3886
				BnaC08g32660D	Protein TRANSPORT INHIBITOR RESPONSE 1	TIR1	GO:0005634(nucleus);GO:0019005(SCF ubiquitin ligase complex);GO:0010011(auxin binding);GO:0000822(inositol hexakisphosphate binding);GO:0005515(protein binding);GO:0004842(ubiquitin-protein ligase activity);GO:0009734(auxin mediated signaling pathway);GO:0007049(cell cycle);GO:0016036(cellular response to phosphate starvation);GO:0006952(defense response);GO:0009873(ethylene mediated signaling pa…	-	3	2373-2395	2386	0	0	2316	7327
				BnaC08g40890D	Protein AUXIN SIGNALING F-BOX 3	AFB3	GO:0005634(nucleus);GO:0019005(SCF ubiquitin ligase complex);GO:0010011(auxin binding);GO:0000822(inositol hexakisphosphate binding);GO:0009734(auxin mediated signaling pathway);GO:0071249(cellular response to nitrate);GO:0006952(defense response);GO:0048527(lateral root development);GO:0080022(primary root development);GO:0002237(response to molecule of bacterial origin)	-	2	2456-2477	2468	0	0	1669	3886
				BnaC09g00530D	GRR1-like protein 1	GRH1	GO:0043224(nuclear SCF ubiquitin ligase complex);GO:0010011(auxin binding);GO:0000822(inositol hexakisphosphate binding);GO:0005515(protein binding);GO:0009734(auxin mediated signaling pathway);GO:0006952(defense response);GO:0045014(negative regulation of transcription by glucose);GO:0002237(response to molecule of bacterial origin);GO:0048443(stamen development)	-	3	2677-2698	2689	-	4	0	20
				BnaCnng29920D	Transcription factor bHLH77	BH077	GO:0005634(nucleus);GO:0003677(DNA binding);GO:0006355(regulation of transcription, DNA-dependent);GO:0006351(transcription, DNA-dependent)	-	3	411-432	423	0	4	194	40
				BnaCnng60850D	Protein TRANSPORT INHIBITOR RESPONSE 1	TIR1	GO:0005634(nucleus);GO:0019005(SCF ubiquitin ligase complex);GO:0010011(auxin binding);GO:0000822(inositol hexakisphosphate binding);GO:0005515(protein binding);GO:0004842(ubiquitin-protein ligase activity);GO:0009734(auxin mediated signaling pathway);GO:0007049(cell cycle);GO:0016036(cellular response to phosphate starvation);GO:0006952(defense response);GO:0009873(ethylene mediated signaling pa…	-	3	2383-2405	2396	0	0	7251	20237
miR394	Con-BN	bna-miR394a_L+1,b_L+1	TTTGGCATTCTGTCCACCTCC	BnaA06g23530D	Probable WRKY transcription factor 19	WRK19	GO:0009941(chloroplast envelope);GO:0031224(intrinsic to membrane);GO:0005634(nucleus);GO:0005524(ATP binding);GO:0017111(nucleoside-triphosphatase activity);GO:0005515(protein binding);GO:0004674(protein serine/threonine kinase activity);GO:0043565(sequence-specific DNA binding);GO:0003700(sequence-specific DNA binding transcription factor activity);GO:0004888(transmembrane signaling receptor ac…	-	3.5	628-649	639	2	2	32	40
				BnaA07g08860D	F-box only protein 6	FBX6	-	-	1	1668-1688	1679	0	0	73	121
				BnaA09g06880D	Probable WRKY transcription factor 19	WRK19	GO:0009941(chloroplast envelope);GO:0031224(intrinsic to membrane);GO:0005634(nucleus);GO:0005524(ATP binding);GO:0017111(nucleoside-triphosphatase activity);GO:0005515(protein binding);GO:0004674(protein serine/threonine kinase activity);GO:0043565(sequence-specific DNA binding);GO:0003700(sequence-specific DNA binding transcription factor activity);GO:0004888(transmembrane signaling receptor ac…	-	3.5	535-556	546	2	2	32	40
				BnaA09g27990D	F-box only protein 6	FBX6	-	-	1	1826-1846	1837	2	0	73	141
				BnaC05g21250D	F-box only protein 6	FBX6	-	-	1	1681-1701	1692	2	0	73	141
				BnaC07g11360D	F-box only protein 6	FBX6	-	-	1	1761-1781	1772	0	0	73	121
miR395	Con-BN	bna-miR395a,b,c	CTGAAGTGTTTGGGGGAACTC	BnaA03g36860D	ATP sulfurylase 1, chloroplastic	APS1	GO:0009570(chloroplast stroma);GO:0005886(plasma membrane);GO:0005524(ATP binding);GO:0004781(sulfate adenylyltransferase (ATP) activity);GO:0046686(response to cadmium ion);GO:0000103(sulfate assimilation)	ko00230(Purine metabolism);ko00450(Selenoamino acid metabolism);ko00920(Sulfur metabolism)	3.5	430-450	441	2	0	108	343
				BnaA05g16830D	ATP-sulfurylase 3, chloroplastic	APS3	GO:0009570(chloroplast stroma);GO:0005524(ATP binding);GO:0004781(sulfate adenylyltransferase (ATP) activity);GO:0009970(cellular response to sulfate starvation);GO:0070206(protein trimerization);GO:0000103(sulfate assimilation)	ko00230(Purine metabolism);ko00450(Selenoamino acid metabolism);ko00920(Sulfur metabolism)	3.5	397-417	408	2	0	108	323
				BnaA06g36560D	ATP sulfurylase 4, chloroplastic	APS4	GO:0009570(chloroplast stroma);GO:0005739(mitochondrion);GO:0005524(ATP binding);GO:0004781(sulfate adenylyltransferase (ATP) activity);GO:0000103(sulfate assimilation)	ko00230(Purine metabolism);ko00450(Selenoamino acid metabolism);ko00920(Sulfur metabolism)	1.5	334-354	345	0	0	129	40
				BnaA08g21110D	Sulfate transporter 2.1	SUT21	GO:0016021(integral to membrane);GO:0008271(secondary active sulfate transmembrane transporter activity);GO:0015293(symporter activity)	-	2.5	41-61	52	4	1	11	40
				BnaA10g22050D	Sulfate transporter 2.1	SUT21	GO:0016021(integral to membrane);GO:0008271(secondary active sulfate transmembrane transporter activity);GO:0015293(symporter activity)	-	2.5	41-61	52	4	2	11	40
				BnaC07g17320D	Pentatricopeptide repeat-containing protein At5g43790	PP415	-	ko00230(Purine metabolism);ko00450(Selenoamino acid metabolism);ko00920(Sulfur metabolism)	1.5	2576-2596	2587	0	1	129	40
				BnaC09g46440D	Sulfate transporter 2.1	SUT21	GO:0016021(integral to membrane);GO:0008271(secondary active sulfate transmembrane transporter activity);GO:0015293(symporter activity)	-	2.5	104-124	115	4	2	11	40
				BnaCnng62800D	ATP sulfurylase 1, chloroplastic	APS1	GO:0009570(chloroplast stroma);GO:0005886(plasma membrane);GO:0005524(ATP binding);GO:0004781(sulfate adenylyltransferase (ATP) activity);GO:0046686(response to cadmium ion);GO:0000103(sulfate assimilation)	ko00230(Purine metabolism);ko00450(Selenoamino acid metabolism);ko00920(Sulfur metabolism)	3.5	408-428	419	2	0	108	343
		bra-miR395a-5p,d-5p, ban-MIR395b-p5	GTTCCTCTGAGCACTTCATTG	BnaA03g05990D	-	-	-	-	3.5	1040-1059	1050	2	-	65	0
		bna-MIR395e-p5	GTTCCCTGAAACGCTTCATTG	BnaA01g24650D	-	-	-	-	4	1963-1984	1974	-	4	0	20
				BnaA07g20310D	-	-	-	-	3.5	808-828	819	2	-	32	0
				BnaC06g19800D	-	-	-	-	3.5	802-822	813	2	-	32	0
miR396	Con-BN	bna-miR396a_1ss21TG	TTCCACAGCTTTCTTGAACTG	BnaA01g00300D	Growth-regulating factor 2	GRF2	-	-	3	1040-1061	1051	0	0	145	565
				BnaA01g27000D	Beta-glucosidase 44	BGL44	GO:0022626(cytosolic ribosome);GO:0005576(extracellular region);GO:0009505(plant-type cell wall);GO:0080081(4-methylumbelliferyl-beta-D-glucopyranoside beta-glucosidase activity);GO:0047668(amygdalin beta-glucosidase activity);GO:0080083(beta-gentiobiose beta-glucosidase activity);GO:0004567(beta-mannosidase activity);GO:0080079(cellobiose glucosidase activity);GO:0080082(esculin beta-glucosidase…	ko00460(Cyanoamino acid metabolism);ko00500(Starch and sucrose metabolism);ko00940(Phenylpropanoid biosynthesis)	3.5	2420-2440	2431	2	0	435	808
				BnaA03g16700D	Growth-regulating factor 3	GRF3	-	-	3	1089-1110	1100	4	4	16	20
				BnaA03g23060D	Growth-regulating factor 1	GRF1	-	-	3.5	587-608	598	0	0	1505	1938
				BnaA03g46480D	Growth-regulating factor 8	GRF8	-	-	3.5	1014-1035	1025	0	0	677	162
				BnaA03g54290D	Growth-regulating factor 2	GRF2	-	-	3	1344-1365	1355	0	0	177	111
				BnaA03g54950D	Growth-regulating factor 2	GRF2	-	-	3	764-785	775	0	0	177	111
				BnaA04g26220D	Growth-regulating factor 9	GRF9	-	-	4	813-834	824	0	-	48	0
				BnaA04g27590D	Proline-rich receptor-like protein kinase PERK1	PERK1	GO:0016021(integral to membrane);GO:0005886(plasma membrane);GO:0005524(ATP binding);GO:0004674(protein serine/threonine kinase activity);GO:0046777(protein autophosphorylation)	-	4	784-804	795	0	2	774	444
				BnaA05g04600D	Ribosome biogenesis protein BOP1 homolog	BOP1	GO:0005730(nucleolus);GO:0005654(nucleoplasm);GO:0006364(rRNA processing)	-	4	2233-2253	2244	2	-	48	0
				BnaA05g07850D	Growth-regulating factor 3	GRF3	-	-	3	1152-1173	1163	-	0	0	101
				BnaA06g31770D	Protease Do-like 1, chloroplastic	DEGP1	GO:0009535(chloroplast thylakoid membrane);GO:0005634(nucleus);GO:0031977(thylakoid lumen);GO:0004252(serine-type endopeptidase activity);GO:0010206(photosystem II repair);GO:0030163(protein catabolic process);GO:0006508(proteolysis);GO:0006950(response to stress)	-	4	2620-2640	2631	2	4	81	20
				BnaA07g15850D	Growth-regulating factor 4	GRF4	-	-	3	826-847	837	4	-	16	0
				BnaA07g25420D	Helicase sen1	SEN1	GO:0035649(Nrd1 complex);GO:0005634(nucleus);GO:0005524(ATP binding);GO:0043141(ATP-dependent 5'-3' DNA helicase activity);GO:0032575(ATP-dependent 5'-3' RNA helicase activity);GO:0006397(mRNA processing);GO:0006364(rRNA processing);GO:0043144(snoRNA processing);GO:0016180(snRNA processing);GO:0006369(termination of RNA polymerase II transcription);GO:0008033(tRNA processing)	-	4	3237-3257	3248	2	-	32	0
				BnaA08g30080D	Growth-regulating factor 2	GRF2	-	-	3	1770-1791	1781	0	0	177	111
				BnaA09g33270D	Growth-regulating factor 4	GRF4	-	-	3	926-947	937	-	0	0	81
				BnaAnng03050D	Nuclear protein STH1/NPS1	STH1	GO:0000775(chromosome, centromeric region);GO:0016586(RSC complex);GO:0005524(ATP binding);GO:0003677(DNA binding);GO:0008094(DNA-dependent ATPase activity);GO:0004386(helicase activity);GO:0070577(histone acetyl-lysine binding);GO:0043044(ATP-dependent chromatin remodeling);GO:0031055(chromatin remodeling at centromere);GO:0007010(cytoskeleton organization);GO:0006302(double-strand break repair)…	-	3.5	4537-4557	4548	-	4	0	40
				BnaAnng36500D	DEAD-box ATP-dependent RNA helicase 21	RH21	GO:0005737(cytoplasm);GO:0005634(nucleus);GO:0005524(ATP binding);GO:0008026(ATP-dependent helicase activity);GO:0003723(RNA binding);GO:0006397(mRNA processing);GO:0008380(RNA splicing)	-	3.5	118-138	129	4	4	32	40
				BnaC01g01310D	Growth-regulating factor 2	GRF2	-	-	3	1147-1168	1158	0	0	145	565
				BnaC01g15970D	Growth-regulating factor 8	GRF8	-	-	3.5	774-795	785	0	0	452	202
				BnaC01g34490D	Beta-glucosidase 44	BGL44	GO:0022626(cytosolic ribosome);GO:0005576(extracellular region);GO:0009505(plant-type cell wall);GO:0080081(4-methylumbelliferyl-beta-D-glucopyranoside beta-glucosidase activity);GO:0047668(amygdalin beta-glucosidase activity);GO:0080083(beta-gentiobiose beta-glucosidase activity);GO:0004567(beta-mannosidase activity);GO:0080079(cellobiose glucosidase activity);GO:0080082(esculin beta-glucosidase…	ko00460(Cyanoamino acid metabolism);ko00500(Starch and sucrose metabolism);ko00940(Phenylpropanoid biosynthesis)	3.5	2331-2351	2342	2	0	435	808
				BnaC02g44780D	Growth-regulating factor 7	GRF7	-	-	3.5	718-739	729	0	-	65	0
				BnaC03g20100D	Growth-regulating factor 3	GRF3	-	-	3	1309-1330	1320	4	0	16	61
				BnaC03g27220D	Growth-regulating factor 1	GRF1	-	-	3.5	2316-2337	2327	1	1	1505	1938
				BnaC04g07230D	Acetyl-coenzyme A carboxylase carboxyl transferase subunit alpha, chloroplastic	ACCA	GO:0009317(acetyl-CoA carboxylase complex);GO:0009706(chloroplast inner membrane);GO:0009570(chloroplast stroma);GO:0003989(acetyl-CoA carboxylase activity);GO:0005524(ATP binding);GO:0006633(fatty acid biosynthetic process)	ko00061(Fatty acid biosynthesis);ko00253(Tetracycline biosynthesis);ko00620(Pyruvate metabolism);ko00640(Propanoate metabolism)	3.5	3087-3107	3098	2	2	81	202
				BnaC04g08880D	Growth-regulating factor 3	GRF3	-	-	3	1157-1178	1168	-	0	0	101
				BnaC04g42140D	CDT1-like protein a, chloroplastic	CDT1A	GO:0009507(chloroplast);GO:0005634(nucleus);GO:0019901(protein kinase binding);GO:0007049(cell cycle);GO:0009658(chloroplast organization);GO:0006260(DNA replication)	-	4	1354-1374	1365	0	0	323	162
				BnaC04g50230D	Growth-regulating factor 9	GRF9	-	-	4	838-859	849	2	-	48	0
				BnaC06g14240D	Growth-regulating factor 4	GRF4	-	-	3	930-951	941	4	-	16	0
				BnaC07g38750D	Growth-regulating factor 8	GRF8	-	-	3.5	1063-1084	1074	0	0	742	565
				BnaC07g46760D	Growth-regulating factor 2	GRF2	-	-	3	1282-1303	1293	0	0	177	111
				BnaCnng33260D	Protease Do-like 1, chloroplastic	DEGP1	GO:0009535(chloroplast thylakoid membrane);GO:0005634(nucleus);GO:0031977(thylakoid lumen);GO:0004252(serine-type endopeptidase activity);GO:0010206(photosystem II repair);GO:0030163(protein catabolic process);GO:0006508(proteolysis);GO:0006950(response to stress)	-	4	2249-2269	2260	2	4	81	20
miR398	Con-BA	bra-miR398-3p	TGTGTTCTCAGGTCACCCCTG	BnaAnng23490D	Dehydration-responsive element-binding protein 2B	DRE2B	GO:0005634(nucleus);GO:0003677(DNA binding);GO:0003700(sequence-specific DNA binding transcription factor activity);GO:0010286(heat acclimation)	-	4	434-453	444	4	4	16	20
				BnaC09g42920D	-	-	-	-	0	3103-3123	3114	0	-	226	0
		bol-miR398a-3p_R-1	TGTGTTCTCAGGTCACCCCT	BnaA01g31290D	Dehydration-responsive element-binding protein 2A	DRE2A	GO:0005634(nucleus);GO:0003677(DNA binding);GO:0005515(protein binding);GO:0003700(sequence-specific DNA binding transcription factor activity);GO:0010286(heat acclimation);GO:0042542(response to hydrogen peroxide);GO:0010224(response to UV-B);GO:0009414(response to water deprivation)	-	4	421-439	430	4	4	16	20
				BnaA02g28690D	-	-	-	-	4	308-327	318	0	0	48	155
				BnaA06g32330D	-	-	-	-	4	309-328	319	0	0	48	155
				BnaAnng23490D	Dehydration-responsive element-binding protein 2B	DRE2B	GO:0005634(nucleus);GO:0003677(DNA binding);GO:0003700(sequence-specific DNA binding transcription factor activity);GO:0010286(heat acclimation)	-	3	435-453	444	4	4	16	20
				BnaAnng26290D	Cytochrome c oxidase subunit 5b-1, mitochondrial	CX5B1	GO:0009535(chloroplast thylakoid membrane);GO:0005743(mitochondrial inner membrane);GO:0050897(cobalt ion binding);GO:0004129(cytochrome-c oxidase activity);GO:0008270(zinc ion binding)	ko00190(Oxidative phosphorylation);ko04260(Cardiac muscle contraction);ko05010(Alzheimer's disease);ko05012(Parkinson's disease);ko05016(Huntington's disease)	4	102-121	112	-	4	0	40
				BnaC03g39200D	Cytochrome c oxidase subunit 5b-1, mitochondrial	CX5B1	GO:0009535(chloroplast thylakoid membrane);GO:0005743(mitochondrial inner membrane);GO:0050897(cobalt ion binding);GO:0004129(cytochrome-c oxidase activity);GO:0008270(zinc ion binding)	ko00190(Oxidative phosphorylation);ko04260(Cardiac muscle contraction);ko05010(Alzheimer's disease);ko05012(Parkinson's disease);ko05016(Huntington's disease)	4	898-917	908	2	2	129	121
				BnaC07g24070D	-	-	-	-	4	416-435	426	2	0	48	155
				BnaC09g42920D	-	-	-	-	0	3104-3123	3114	0	-	226	0
miR399	Con-BN	bna-miR399a_1ss13TG,b_1ss13TG	TGCCAAAGGAGAGTTGCCCGG	BnaA04g19750D	Probable ubiquitin-conjugating enzyme E2 24	UBC24	GO:0005524(ATP binding);GO:0004842(ubiquitin-protein ligase activity);GO:0016036(cellular response to phosphate starvation);GO:0055062(phosphate ion homeostasis);GO:0006817(phosphate transport)	ko04120(Ubiquitin mediated proteolysis)	3	1050-1070	1061	2	2	903	2786
				BnaA09g32030D	Glutamate receptor 3.6	GLR36	GO:0016021(integral to membrane);GO:0030288(outer membrane-bounded periplasmic space);GO:0005886(plasma membrane);GO:0005262(calcium channel activity);GO:0005234(extracellular-glutamate-gated ion channel activity);GO:0004965(GABA-B receptor activity);GO:0004970(ionotropic glutamate receptor activity);GO:0019722(calcium-mediated signaling);GO:0071230(cellular response to amino acid stimulus);GO:00…	-	3.5	3296-3316	3307	2	-	32	0
				BnaC08g22850D	Glutamate receptor 3.6	GLR36	GO:0016021(integral to membrane);GO:0030288(outer membrane-bounded periplasmic space);GO:0005886(plasma membrane);GO:0005262(calcium channel activity);GO:0005234(extracellular-glutamate-gated ion channel activity);GO:0004965(GABA-B receptor activity);GO:0004970(ionotropic glutamate receptor activity);GO:0019722(calcium-mediated signaling);GO:0071230(cellular response to amino acid stimulus);GO:00…	-	3.5	2865-2885	2876	2	-	32	0
				BnaC09g26140D	Protein SPA1-RELATED 2	SPA2	GO:0005634(nucleus);GO:0005524(ATP binding);GO:0005515(protein binding);GO:0004672(protein kinase activity);GO:0009585(red, far-red light phototransduction)	ko04115(p53 signaling pathway);ko04120(Ubiquitin mediated proteolysis)	3.5	971-991	982	2	2	48	81
		bna-MIR399c-p5	AGGGCAAGATCTCCTTTGGC	BnaA04g26750D	Two-component response regulator-like APRR9	APRR9	GO:0005634(nucleus);GO:0003677(DNA binding);GO:0005515(protein binding);GO:0000156(two-component response regulator activity);GO:0007623(circadian rhythm);GO:0045892(negative regulation of transcription, DNA-dependent);GO:0010017(red or far-red light signaling pathway);GO:0009266(response to temperature stimulus);GO:0006351(transcription, DNA-dependent)	ko04712(Circadian rhythm - plant)	4	1589-1607	1598	4	3	16	40
				BnaC04g51630D	Metal tolerance protein A2	MTPA2	GO:0016021(integral to membrane);GO:0009705(plant-type vacuole membrane);GO:0008324(cation transmembrane transporter activity);GO:0046872(metal ion binding);GO:0010299(detoxification of cobalt ion);GO:0010312(detoxification of zinc ion);GO:0006829(zinc ion transport)	-	4	1641-1659	1650	4	2	16	40
	Con-BA	ath-miR399c-3p	TGCCAAAGGAGAGTTGCCCTG	BnaA04g19750D	Probable ubiquitin-conjugating enzyme E2 24	UBC24	GO:0005524(ATP binding);GO:0004842(ubiquitin-protein ligase activity);GO:0016036(cellular response to phosphate starvation);GO:0055062(phosphate ion homeostasis);GO:0006817(phosphate transport)	ko04120(Ubiquitin mediated proteolysis)	3	1345-1365	1356	2	2	613	929
miR400	Con-BA	bra-miR400-3p	GACTTATAATGATCTCATGAA	BnaA09g29630D	UPF0392 protein At1g27200	Y1720	GO:0016021(integral to membrane)	-	4	1450-1469	1460	4	1	32	81
miR403	Con-BN	bna-miR403	TTAGATTCACGCACAAACTCG	BnaA05g14760D	Protein argonaute 2	AGO2	GO:0030529(ribonucleoprotein complex);GO:0035197(siRNA binding);GO:0051607(defense response to virus);GO:0031047(gene silencing by RNA);GO:0006355(regulation of transcription, DNA-dependent);GO:0006417(regulation of translation);GO:0006351(transcription, DNA-dependent)	-	1	3367-3387	3378	0	0	1226	1171
				BnaA09g25290D	Protein argonaute 2	AGO2	GO:0030529(ribonucleoprotein complex);GO:0035197(siRNA binding);GO:0051607(defense response to virus);GO:0031047(gene silencing by RNA);GO:0006355(regulation of transcription, DNA-dependent);GO:0006417(regulation of translation);GO:0006351(transcription, DNA-dependent)	-	1	3538-3558	3549	0	0	452	525
				BnaCnng68320D	Protein argonaute 2	AGO2	GO:0030529(ribonucleoprotein complex);GO:0035197(siRNA binding);GO:0051607(defense response to virus);GO:0031047(gene silencing by RNA);GO:0006355(regulation of transcription, DNA-dependent);GO:0006417(regulation of translation);GO:0006351(transcription, DNA-dependent)	-	1	3019-3039	3030	0	0	516	969
miR824	Con-BN	bna-miR824	TAGACCATTTGTGAGAAGGGA	BnaA01g02900D	Agamous-like MADS-box protein AGL16	AGL16	GO:0005634(nucleus);GO:0042803(protein homodimerization activity);GO:0043565(sequence-specific DNA binding);GO:0003700(sequence-specific DNA binding transcription factor activity);GO:0008134(transcription factor binding);GO:0010440(stomatal lineage progression)	-	0.5	2888-2908	2899	0	0	323	424
				BnaA03g51000D	Agamous-like MADS-box protein AGL16	AGL16	GO:0005634(nucleus);GO:0042803(protein homodimerization activity);GO:0043565(sequence-specific DNA binding);GO:0003700(sequence-specific DNA binding transcription factor activity);GO:0008134(transcription factor binding);GO:0010440(stomatal lineage progression)	-	0.5	3134-3154	3145	2	2	97	141
				BnaC01g04170D	Agamous-like MADS-box protein AGL16	AGL16	GO:0005634(nucleus);GO:0042803(protein homodimerization activity);GO:0043565(sequence-specific DNA binding);GO:0003700(sequence-specific DNA binding transcription factor activity);GO:0008134(transcription factor binding);GO:0010440(stomatal lineage progression)	-	0.5	2870-2890	2881	0	0	290	464
				BnaC07g44870D	Agamous-like MADS-box protein AGL16	AGL16	GO:0005634(nucleus);GO:0042803(protein homodimerization activity);GO:0043565(sequence-specific DNA binding);GO:0003700(sequence-specific DNA binding transcription factor activity);GO:0008134(transcription factor binding);GO:0010440(stomatal lineage progression)	-	0.5	3132-3152	3143	2	2	97	141
		bna-MIR824-p3	CCTTCTCATCGATGGTCTAGA	BnaA02g08520D	60S ribosomal protein L31-3	RL313	GO:0005618(cell wall);GO:0022625(cytosolic large ribosomal subunit);GO:0009506(plasmodesma);GO:0003735(structural constituent of ribosome);GO:0006412(translation)	ko03010(Ribosome)	4	939-960	951	4	-	32	0
				BnaA03g10640D	60S ribosomal protein L31-3	RL313	GO:0005618(cell wall);GO:0022625(cytosolic large ribosomal subunit);GO:0009506(plasmodesma);GO:0003735(structural constituent of ribosome);GO:0006412(translation)	ko03010(Ribosome)	4	1091-1112	1103	-	4	0	40
				BnaA04g26960D	Long chain acyl-CoA synthetase 1	LACS1	GO:0005783(endoplasmic reticulum);GO:0005524(ATP binding);GO:0004467(long-chain fatty acid-CoA ligase activity);GO:0031957(very long-chain fatty acid-CoA ligase activity);GO:0010143(cutin biosynthetic process);GO:0010025(wax biosynthetic process)	ko00071(Fatty acid metabolism);ko03320(PPAR signaling pathway);ko04146(Peroxisome);ko04920(Adipocytokine signaling pathway)	3.5	1339-1358	1349	4	-	16	0
				BnaA05g21080D	Kinesin-related protein 4	KIF4	GO:0000775(chromosome, centromeric region);GO:0005737(cytoplasm);GO:0005874(microtubule);GO:0005524(ATP binding);GO:0043515(kinetochore binding);GO:0003777(microtubule motor activity);GO:0051301(cell division);GO:0007018(microtubule-based movement);GO:0000089(mitotic metaphase);GO:0006810(transport)	-	3.5	8601-8621	8612	4	4	16	20
				BnaC04g51420D	Long chain acyl-CoA synthetase 1	LACS1	GO:0005783(endoplasmic reticulum);GO:0005524(ATP binding);GO:0004467(long-chain fatty acid-CoA ligase activity);GO:0031957(very long-chain fatty acid-CoA ligase activity);GO:0010143(cutin biosynthetic process);GO:0010025(wax biosynthetic process)	ko00071(Fatty acid metabolism);ko03320(PPAR signaling pathway);ko04146(Peroxisome);ko04920(Adipocytokine signaling pathway)	3.5	1583-1602	1593	4	-	16	0
				BnaC05g33920D	Kinesin-related protein 4	KIF4	GO:0000775(chromosome, centromeric region);GO:0005737(cytoplasm);GO:0005874(microtubule);GO:0005524(ATP binding);GO:0043515(kinetochore binding);GO:0003777(microtubule motor activity);GO:0051301(cell division);GO:0007018(microtubule-based movement);GO:0000089(mitotic metaphase);GO:0006810(transport)	-	3.5	8708-8728	8719	4	4	16	20
miR1885	Con-BA	bra-miR1885b	TACATCTTCTCCGCGGAAGCTC	BnaA01g24490D	Protein SUPPRESSOR OF npr1-1, CONSTITUTIVE 1	SNC1	GO:0005737(cytoplasm);GO:0031224(intrinsic to membrane);GO:0005792(microsome);GO:0005634(nucleus);GO:0005524(ATP binding);GO:0017111(nucleoside-triphosphatase activity);GO:0005515(protein binding);GO:0004888(transmembrane signaling receptor activity);GO:0006915(apoptosis);GO:0042742(defense response to bacterium);GO:0009733(response to auxin stimulus);GO:0009862(systemic acquired resistance, sali…	-	3	227-248	239	2	2	48	61
				BnaA01g32130D	Putative disease resistance protein At4g11170	Y4117	GO:0031224(intrinsic to membrane);GO:0005739(mitochondrion);GO:0005524(ATP binding);GO:0017111(nucleoside-triphosphatase activity);GO:0004888(transmembrane signaling receptor activity);GO:0006915(apoptosis);GO:0045087(innate immune response);GO:0010193(response to ozone)	-	2	165-186	177	0	0	403	323
				BnaA02g03790D	Putative disease resistance protein At4g11170	Y4117	GO:0031224(intrinsic to membrane);GO:0005739(mitochondrion);GO:0005524(ATP binding);GO:0017111(nucleoside-triphosphatase activity);GO:0004888(transmembrane signaling receptor activity);GO:0006915(apoptosis);GO:0045087(innate immune response);GO:0010193(response to ozone)	-	2.5	45-66	57	1	4	97	40
				BnaA03g07040D	Putative U-box domain-containing protein 46	PUB46	GO:0000151(ubiquitin ligase complex);GO:0005488(binding);GO:0004842(ubiquitin-protein ligase activity)	ko00500(Starch and sucrose metabolism)	3.5	4746-4767	4758	2	2	65	162
				BnaA03g29580D	Putative disease resistance protein At4g11170	Y4117	GO:0031224(intrinsic to membrane);GO:0005739(mitochondrion);GO:0005524(ATP binding);GO:0017111(nucleoside-triphosphatase activity);GO:0004888(transmembrane signaling receptor activity);GO:0006915(apoptosis);GO:0045087(innate immune response);GO:0010193(response to ozone)	-	4	204-225	216	4	2	16	61
				BnaA03g45000D	Putative disease resistance protein At4g11170	Y4117	GO:0031224(intrinsic to membrane);GO:0005739(mitochondrion);GO:0005524(ATP binding);GO:0017111(nucleoside-triphosphatase activity);GO:0004888(transmembrane signaling receptor activity);GO:0006915(apoptosis);GO:0045087(innate immune response);GO:0010193(response to ozone)	-	3	444-465	456	0	0	1871	1655
				BnaA03g45020D	Putative disease resistance protein At4g11170	Y4117	GO:0031224(intrinsic to membrane);GO:0005739(mitochondrion);GO:0005524(ATP binding);GO:0017111(nucleoside-triphosphatase activity);GO:0004888(transmembrane signaling receptor activity);GO:0006915(apoptosis);GO:0045087(innate immune response);GO:0010193(response to ozone)	-	3	258-279	270	2	0	242	602
				BnaA03g45050D	Putative disease resistance protein At4g11170	Y4117	GO:0031224(intrinsic to membrane);GO:0005739(mitochondrion);GO:0005524(ATP binding);GO:0017111(nucleoside-triphosphatase activity);GO:0004888(transmembrane signaling receptor activity);GO:0006915(apoptosis);GO:0045087(innate immune response);GO:0010193(response to ozone)	-	4	243-264	255	0	0	48	172
				BnaA08g10100D	Putative disease resistance protein At4g11170	Y4117	GO:0031224(intrinsic to membrane);GO:0005739(mitochondrion);GO:0005524(ATP binding);GO:0017111(nucleoside-triphosphatase activity);GO:0004888(transmembrane signaling receptor activity);GO:0006915(apoptosis);GO:0045087(innate immune response);GO:0010193(response to ozone)	-	3	6894-6915	6906	4	4	16	20
				BnaAnng10090D	Putative UDP-arabinose 4-epimerase 4	ARAE4	GO:0032580(Golgi cisterna membrane);GO:0016021(integral to membrane);GO:0050662(coenzyme binding);GO:0050373(UDP-arabinose 4-epimerase activity);GO:0003978(UDP-glucose 4-epimerase activity);GO:0006012(galactose metabolic process)	ko00520(Amino sugar and nucleotide sugar metabolism)	0	2305-2326	2317	0	0	161	323
				BnaAnng14860D	Putative disease resistance protein At4g11170	Y4117	GO:0031224(intrinsic to membrane);GO:0005739(mitochondrion);GO:0005524(ATP binding);GO:0017111(nucleoside-triphosphatase activity);GO:0004888(transmembrane signaling receptor activity);GO:0006915(apoptosis);GO:0045087(innate immune response);GO:0010193(response to ozone)	-	4	186-207	198	-	4	0	20
				BnaC01g39050D	Putative disease resistance protein At4g11170	Y4117	GO:0031224(intrinsic to membrane);GO:0005739(mitochondrion);GO:0005524(ATP binding);GO:0017111(nucleoside-triphosphatase activity);GO:0004888(transmembrane signaling receptor activity);GO:0006915(apoptosis);GO:0045087(innate immune response);GO:0010193(response to ozone)	-	2	45-66	57	0	0	113	81
				BnaC01g40310D	Putative disease resistance protein At4g11170	Y4117	GO:0031224(intrinsic to membrane);GO:0005739(mitochondrion);GO:0005524(ATP binding);GO:0017111(nucleoside-triphosphatase activity);GO:0004888(transmembrane signaling receptor activity);GO:0006915(apoptosis);GO:0045087(innate immune response);GO:0010193(response to ozone)	-	4	186-207	198	-	4	0	20
				BnaC02g08420D	Putative disease resistance protein At4g11170	Y4117	GO:0031224(intrinsic to membrane);GO:0005739(mitochondrion);GO:0005524(ATP binding);GO:0017111(nucleoside-triphosphatase activity);GO:0004888(transmembrane signaling receptor activity);GO:0006915(apoptosis);GO:0045087(innate immune response);GO:0010193(response to ozone)	-	3.5	1374-1395	1386	2	2	55	63
				BnaC02g09250D	Putative disease resistance protein At4g11170	Y4117	GO:0031224(intrinsic to membrane);GO:0005739(mitochondrion);GO:0005524(ATP binding);GO:0017111(nucleoside-triphosphatase activity);GO:0004888(transmembrane signaling receptor activity);GO:0006915(apoptosis);GO:0045087(innate immune response);GO:0010193(response to ozone)	-	3.5	51-72	63	2	0	65	162
				BnaC02g38690D	Protein SUPPRESSOR OF npr1-1, CONSTITUTIVE 1	SNC1	GO:0005737(cytoplasm);GO:0031224(intrinsic to membrane);GO:0005792(microsome);GO:0005634(nucleus);GO:0005524(ATP binding);GO:0017111(nucleoside-triphosphatase activity);GO:0005515(protein binding);GO:0004888(transmembrane signaling receptor activity);GO:0006915(apoptosis);GO:0042742(defense response to bacterium);GO:0009733(response to auxin stimulus);GO:0009862(systemic acquired resistance, sali…	-	2.5	57-78	69	0	0	129	121
				BnaC03g64750D	Putative disease resistance protein At4g11170	Y4117	GO:0031224(intrinsic to membrane);GO:0005739(mitochondrion);GO:0005524(ATP binding);GO:0017111(nucleoside-triphosphatase activity);GO:0004888(transmembrane signaling receptor activity);GO:0006915(apoptosis);GO:0045087(innate immune response);GO:0010193(response to ozone)	-	3	9396-9417	9408	4	4	16	20
				BnaC03g69970D	Putative disease resistance protein At4g11170	Y4117	GO:0031224(intrinsic to membrane);GO:0005739(mitochondrion);GO:0005524(ATP binding);GO:0017111(nucleoside-triphosphatase activity);GO:0004888(transmembrane signaling receptor activity);GO:0006915(apoptosis);GO:0045087(innate immune response);GO:0010193(response to ozone)	-	4	105-126	117	0	0	355	444
				BnaC07g37000D	Putative disease resistance protein At4g11170	Y4117	GO:0031224(intrinsic to membrane);GO:0005739(mitochondrion);GO:0005524(ATP binding);GO:0017111(nucleoside-triphosphatase activity);GO:0004888(transmembrane signaling receptor activity);GO:0006915(apoptosis);GO:0045087(innate immune response);GO:0010193(response to ozone)	-	3	339-360	351	2	0	242	602
				BnaC07g37020D	Putative disease resistance protein At4g11170	Y4117	GO:0031224(intrinsic to membrane);GO:0005739(mitochondrion);GO:0005524(ATP binding);GO:0017111(nucleoside-triphosphatase activity);GO:0004888(transmembrane signaling receptor activity);GO:0006915(apoptosis);GO:0045087(innate immune response);GO:0010193(response to ozone)	-	4	267-288	279	0	0	274	764
				BnaCnng14160D	Putative disease resistance protein At4g11170	Y4117	GO:0031224(intrinsic to membrane);GO:0005739(mitochondrion);GO:0005524(ATP binding);GO:0017111(nucleoside-triphosphatase activity);GO:0004888(transmembrane signaling receptor activity);GO:0006915(apoptosis);GO:0045087(innate immune response);GO:0010193(response to ozone)	-	4	249-270	261	2	2	48	61
				BnaCnng39060D	Putative disease resistance protein At4g11170	Y4117	GO:0031224(intrinsic to membrane);GO:0005739(mitochondrion);GO:0005524(ATP binding);GO:0017111(nucleoside-triphosphatase activity);GO:0004888(transmembrane signaling receptor activity);GO:0006915(apoptosis);GO:0045087(innate immune response);GO:0010193(response to ozone)	-	3.5	60-81	72	2	2	55	74
miR5654	Con-BA	bra-miR5654a	ATAAATCCCAAGCATCATCCA	BnaA09g46700D	Pentatricopeptide repeat-containing protein At1g12300, mitochondrial	PPR36	GO:0005739(mitochondrion);GO:0005488(binding)	-	3	1136-1156	1147	0	2	108	71
				BnaA09g46840D	Pentatricopeptide repeat-containing protein At3g22470, mitochondrial	PP247	GO:0005739(mitochondrion);GO:0005488(binding)	-	3	1641-1661	1652	0	0	108	61
				BnaA09g47120D	Pentatricopeptide repeat-containing protein At1g12300, mitochondrial	PPR36	GO:0005739(mitochondrion);GO:0005488(binding)	-	3	1547-1567	1558	0	0	70	185
				BnaA10g04990D	Probable disease resistance protein At1g12280	DRL1	GO:0005524(ATP binding);GO:0006915(apoptosis);GO:0006952(defense response)	-	4	87-107	98	4	-	16	0
				BnaC05g28500D	-	-	-	-	1	8-29	20	4	-	32	0
				BnaC06g40800D	Probable disease resistance protein At1g12280	DRL1	GO:0005524(ATP binding);GO:0006915(apoptosis);GO:0006952(defense response)	-	4	431-451	442	4	-	16	0
				BnaC08g40130D	Pentatricopeptide repeat-containing protein At3g22470, mitochondrial	PP247	GO:0005739(mitochondrion);GO:0005488(binding)	-	3	1013-1033	1024	0	0	81	225
				BnaC08g40920D	Pentatricopeptide repeat-containing protein At3g22470, mitochondrial	PP247	GO:0005739(mitochondrion);GO:0005488(binding)	-	3	935-955	946	2	0	70	205
				BnaC08g44830D	Pentatricopeptide repeat-containing protein At1g06580	PPR17	GO:0005488(binding)	-	4	695-715	706	-	4	0	20
				BnaC09g37630D	Pentatricopeptide repeat-containing protein At1g12620	PPR37	GO:0005488(binding)	-	3	1546-1566	1557	2	4	16	20
miR5718	Con-BA	bra-miR5718	TCAGAACCAAACACAGAACAAG	BnaC04g04980D	-	-	-	-	3	1296-1316	1307	4	-	32	0
				BnaC08g49360D	Glycine-rich RNA-binding protein GRP1A	GRP1	GO:0005634(nucleus);GO:0000166(nucleotide binding);GO:0003723(RNA binding)	ko05130(Pathogenic Escherichia coli infection)	3.5	908-930	921	3	-	65	0
				BnaC09g08970D	Purple acid phosphatase 10	PPA10	GO:0005829(cytosol);GO:0005576(extracellular region);GO:0009505(plant-type cell wall);GO:0009506(plasmodesma);GO:0003993(acid phosphatase activity);GO:0046872(metal ion binding)	-	3	143-164	155	0	0	339	404
miR5719	Con-BA	bra-MIR5719-p3_1ss21AT	TCGGATTATCATCACAACACT	BnaC06g20510D	Probable pectin methyltransferase QUA2	PMTT	GO:0000139(Golgi membrane);GO:0016021(integral to membrane);GO:0008168(methyltransferase activity);GO:0007155(cell adhesion);GO:0007047(cellular cell wall organization);GO:0010289(homogalacturonan biosynthetic process);GO:0009735(response to cytokinin stimulus);GO:0048364(root development);GO:0048367(shoot development)	-	4	3596-3615	3606	4	-	16	0
		bra-MIR5719-p5_1ss16AC	TGTTGTGATGATAATCCGACT	BnaA03g45000D	Putative disease resistance protein At4g11170	Y4117	GO:0031224(intrinsic to membrane);GO:0005739(mitochondrion);GO:0005524(ATP binding);GO:0017111(nucleoside-triphosphatase activity);GO:0004888(transmembrane signaling receptor activity);GO:0006915(apoptosis);GO:0045087(innate immune response);GO:0010193(response to ozone)	-	2.5	4949-4969	4960	-	4	0	40
				BnaA03g45020D	Putative disease resistance protein At4g11170	Y4117	GO:0031224(intrinsic to membrane);GO:0005739(mitochondrion);GO:0005524(ATP binding);GO:0017111(nucleoside-triphosphatase activity);GO:0004888(transmembrane signaling receptor activity);GO:0006915(apoptosis);GO:0045087(innate immune response);GO:0010193(response to ozone)	-	2.5	1513-1533	1524	-	4	0	40
				BnaA03g45040D	Putative disease resistance protein At4g11170	Y4117	GO:0031224(intrinsic to membrane);GO:0005739(mitochondrion);GO:0005524(ATP binding);GO:0017111(nucleoside-triphosphatase activity);GO:0004888(transmembrane signaling receptor activity);GO:0006915(apoptosis);GO:0045087(innate immune response);GO:0010193(response to ozone)	-	2	1151-1171	1162	-	4	0	40
				BnaA05g33170D	Putative disease resistance protein At4g11170	Y4117	GO:0031224(intrinsic to membrane);GO:0005739(mitochondrion);GO:0005524(ATP binding);GO:0017111(nucleoside-triphosphatase activity);GO:0004888(transmembrane signaling receptor activity);GO:0006915(apoptosis);GO:0045087(innate immune response);GO:0010193(response to ozone)	-	2	1222-1242	1233	4	2	11	27
				BnaA07g13040D	Serrate RNA effector molecule	SRRT	GO:0009507(chloroplast);GO:0005829(cytosol);GO:0010445(nuclear dicing body);GO:0016607(nuclear speck);GO:0005730(nucleolus);GO:0005515(protein binding);GO:0008270(zinc ion binding);GO:0016568(chromatin modification);GO:0006397(mRNA processing);GO:0031053(primary miRNA processing);GO:0010267(production of ta-siRNAs involved in RNA interference);GO:2000011(regulation of adaxial/abaxial pattern form…	-	4	1312-1331	1323	2	-	22	0
				BnaC03g61680D	Putative disease resistance protein At4g11170	Y4117	GO:0031224(intrinsic to membrane);GO:0005739(mitochondrion);GO:0005524(ATP binding);GO:0017111(nucleoside-triphosphatase activity);GO:0004888(transmembrane signaling receptor activity);GO:0006915(apoptosis);GO:0045087(innate immune response);GO:0010193(response to ozone)	-	1	2589-2609	2600	4	2	16	40
				BnaC04g38630D	Serrate RNA effector molecule	SRRT	GO:0009507(chloroplast);GO:0005829(cytosol);GO:0010445(nuclear dicing body);GO:0016607(nuclear speck);GO:0005730(nucleolus);GO:0005515(protein binding);GO:0008270(zinc ion binding);GO:0016568(chromatin modification);GO:0006397(mRNA processing);GO:0031053(primary miRNA processing);GO:0010267(production of ta-siRNAs involved in RNA interference);GO:2000011(regulation of adaxial/abaxial pattern form…	-	4	1144-1163	1155	3	-	22	0
				BnaC05g47400D	Putative disease resistance protein At4g11170	Y4117	GO:0031224(intrinsic to membrane);GO:0005739(mitochondrion);GO:0005524(ATP binding);GO:0017111(nucleoside-triphosphatase activity);GO:0004888(transmembrane signaling receptor activity);GO:0006915(apoptosis);GO:0045087(innate immune response);GO:0010193(response to ozone)	-	2	1294-1314	1305	4	2	11	27
				BnaC05g47420D	Putative disease resistance protein At4g11170	Y4117	GO:0031224(intrinsic to membrane);GO:0005739(mitochondrion);GO:0005524(ATP binding);GO:0017111(nucleoside-triphosphatase activity);GO:0004888(transmembrane signaling receptor activity);GO:0006915(apoptosis);GO:0045087(innate immune response);GO:0010193(response to ozone)	-	3	1227-1247	1238	4	2	11	27
				BnaC06g43790D	Patellin-1	PATL1	GO:0048046(apoplast);GO:0009507(chloroplast);GO:0016021(integral to membrane);GO:0005886(plasma membrane);GO:0009506(plasmodesma);GO:0005773(vacuole);GO:0008289(lipid binding);GO:0002020(protease binding);GO:0007049(cell cycle);GO:0051301(cell division);GO:0009860(pollen tube growth);GO:0006810(transport)	-	4	1499-1520	1511	-	4	0	13
				BnaCnng14160D	Putative disease resistance protein At4g11170	Y4117	GO:0031224(intrinsic to membrane);GO:0005739(mitochondrion);GO:0005524(ATP binding);GO:0017111(nucleoside-triphosphatase activity);GO:0004888(transmembrane signaling receptor activity);GO:0006915(apoptosis);GO:0045087(innate immune response);GO:0010193(response to ozone)	-	2	1376-1396	1387	-	4	0	40
miR5725	Con-BA	bra-MIR5725-p3	TGGCACAATCTGATCTGCATC	BnaA03g48610D	E3 ubiquitin-protein ligase RMA3	RMA3	GO:0005789(endoplasmic reticulum membrane);GO:0016021(integral to membrane);GO:0004842(ubiquitin-protein ligase activity);GO:0008270(zinc ion binding)	ko00860(Porphyrin and chlorophyll metabolism)	4	1556-1575	1566	2	-	65	0
				BnaA09g25870D	Twinkle homolog protein, chloroplastic/mitochondrial	TWIH	-	-	4	7088-7108	7099	-	4	0	40
				BnaCnng46940D	-	-	-	-	4	1896-1916	1907	2	4	65	20
miR6028	Con-BN	bna-MIR6028-p3	TGAATGTCTTTCTCTTCATC	BnaA01g20340D	-	-	-	-	3	1588-1606	1598	0	0	564	283
				BnaA02g01070D	Probable E3 ubiquitin-protein ligase HERC2	HERC2	GO:0005622(intracellular);GO:0020037(heme binding);GO:0004842(ubiquitin-protein ligase activity);GO:0042787(protein ubiquitination involved in ubiquitin-dependent protein catabolic process)	ko04120(Ubiquitin mediated proteolysis)	4	2045-2064	2055	2	2	32	81
				BnaA03g07810D	Proline-rich receptor-like protein kinase PERK9	PERK9	GO:0016021(integral to membrane);GO:0005886(plasma membrane);GO:0005524(ATP binding);GO:0004674(protein serine/threonine kinase activity)	-	4	1123-1142	1133	4	-	32	0
				BnaA03g35510D	Myosin-VIIa	MYO7A	GO:0045179(apical cortex);GO:0005902(microvillus);GO:0016459(myosin complex);GO:0003779(actin binding);GO:0030898(actin-dependent ATPase activity);GO:0005524(ATP binding);GO:0003774(motor activity);GO:0032027(myosin light chain binding);GO:0030048(actin filament-based movement);GO:0048800(antennal morphogenesis);GO:0008407(bristle morphogenesis);GO:0035317(imaginal disc-derived wing hair organiza…	-	4	6370-6389	6380	2	3	40	30
				BnaA03g45020D	Putative disease resistance protein At4g11170	Y4117	GO:0031224(intrinsic to membrane);GO:0005739(mitochondrion);GO:0005524(ATP binding);GO:0017111(nucleoside-triphosphatase activity);GO:0004888(transmembrane signaling receptor activity);GO:0006915(apoptosis);GO:0045087(innate immune response);GO:0010193(response to ozone)	-	4	312-331	322	2	2	54	40
				BnaA04g03760D	Beta-hexosaminidase 1	HEXO1	-	ko00511(Other glycan degradation);ko00520(Amino sugar and nucleotide sugar metabolism);ko00531(Glycosaminoglycan degradation);ko00603(Glycosphingolipid biosynthesis - globo series);ko00604(Glycosphingolipid biosynthesis - ganglio series);ko04142(Lysosome)	4	2271-2289	2280	4	4	16	20
				BnaA05g05100D	BON1-associated protein 2	BAP2	GO:0016020(membrane);GO:0006952(defense response)	-	1.5	78-97	88	-	4	0	40
				BnaA06g00960D	ABC transporter G family member 24	AB24G	GO:0016021(integral to membrane);GO:0005886(plasma membrane);GO:0005524(ATP binding);GO:0016887(ATPase activity);GO:0006810(transport)	ko02010(ABC transporters)	4	4677-4696	4687	2	-	48	0
				BnaA06g15600D	GTP-binding protein At3g49725, chloroplastic	Y3725	GO:0009507(chloroplast);GO:0005525(GTP binding)	-	4	2590-2609	2600	-	4	0	20
				BnaA07g22100D	Gibberellin-regulated protein 6	GASA6	-	-	4	2547-2566	2557	-	4	0	20
				BnaA07g26320D	Calmodulin-binding transcription activator 4	CMTA4	GO:0005829(cytosol);GO:0005634(nucleus);GO:0005516(calmodulin binding);GO:0003677(DNA binding);GO:0006355(regulation of transcription, DNA-dependent);GO:0006950(response to stress);GO:0006351(transcription, DNA-dependent)	-	3.5	8610-8629	8620	2	-	32	0
				BnaA09g49440D	Protein phosphatase 2C 3	P2C03	GO:0005886(plasma membrane);GO:0008287(protein serine/threonine phosphatase complex);GO:0046872(metal ion binding);GO:0005267(potassium channel activity);GO:0004722(protein serine/threonine phosphatase activity);GO:0006470(protein dephosphorylation)	-	4	608-626	618	4	-	32	0
				BnaAnng10160D	Elongation factor Tu, chloroplastic	EFTU	GO:0048046(apoplast);GO:0009941(chloroplast envelope);GO:0009570(chloroplast stroma);GO:0009535(chloroplast thylakoid membrane);GO:0009295(nucleoid);GO:0005730(nucleolus);GO:0005525(GTP binding);GO:0003924(GTPase activity);GO:0005515(protein binding);GO:0003746(translation elongation factor activity)	ko04626(Plant-pathogen interaction)	4	1168-1188	1179	2	2	1048	1030
				BnaAnng26220D	-	-	-	-	3.5	1643-1661	1653	2	-	81	0
				BnaC01g25570D	-	-	-	-	3	1591-1609	1601	2	2	564	283
				BnaC02g03920D	Inhibitor of Bruton tyrosine kinase	IBTK	GO:0005737(cytoplasm);GO:0016020(membrane)	ko04120(Ubiquitin mediated proteolysis)	4	1223-1242	1233	2	2	32	81
				BnaC02g22210D	-	-	-	-	4	722-742	733	2	-	32	0
				BnaC02g24880D	Uncharacterized methyltransferase At1g78140, chloroplastic	Y1814	GO:0010287(plastoglobule);GO:0008168(methyltransferase activity)	-	4	527-546	537	4	-	11	0
				BnaC02g35640D	Transcription factor AIG1	BH032	GO:0005634(nucleus);GO:0003677(DNA binding);GO:0005515(protein binding);GO:0009718(anthocyanin biosynthetic process);GO:0016036(cellular response to phosphate starvation);GO:0006355(regulation of transcription, DNA-dependent);GO:0080147(root hair cell development);GO:0006351(transcription, DNA-dependent)	-	4	1309-1327	1318	4	-	32	0
				BnaC03g41300D	Myosin-VIIa	MYO7A	GO:0045179(apical cortex);GO:0005902(microvillus);GO:0016459(myosin complex);GO:0003779(actin binding);GO:0030898(actin-dependent ATPase activity);GO:0005524(ATP binding);GO:0003774(motor activity);GO:0032027(myosin light chain binding);GO:0030048(actin filament-based movement);GO:0048800(antennal morphogenesis);GO:0008407(bristle morphogenesis);GO:0035317(imaginal disc-derived wing hair organiza…	-	4	6072-6091	6082	2	2	40	30
				BnaC03g48190D	SKP1-like protein 1B	SKP1B	GO:0005634(nucleus);GO:0005515(protein binding);GO:0009734(auxin mediated signaling pathway);GO:0007059(chromosome segregation);GO:0009793(embryo development ending in seed dormancy);GO:0009873(ethylene mediated signaling pathway);GO:0044419(interspecies interaction between organisms);GO:0006511(ubiquitin-dependent protein catabolic process)	ko04110(Cell cycle);ko04111(Cell cycle - yeast);ko04114(Oocyte meiosis);ko04120(Ubiquitin mediated proteolysis);ko04310(Wnt signaling pathway);ko04350(TGF-beta signaling pathway)	4	136-155	146	4	-	32	0
				BnaC04g04480D	BON1-associated protein 2	BAP2	GO:0016020(membrane);GO:0006952(defense response)	-	1.5	78-97	88	0	0	258	323
				BnaC06g22840D	Xylogalacturonan beta-1,3-xylosyltransferase	XGD1	GO:0000139(Golgi membrane);GO:0016021(integral to membrane);GO:0035252(UDP-xylosyltransferase activity);GO:0045489(pectin biosynthetic process);GO:0010398(xylogalacturonan metabolic process)	-	3	1651-1670	1661	-	4	0	20
				BnaC08g21330D	GTP-binding protein At3g49725, chloroplastic	Y3725	GO:0009507(chloroplast);GO:0005525(GTP binding)	-	4	1727-1746	1737	-	4	0	20
				BnaCnng12090D	-	-	-	-	3.5	1655-1673	1665	2	-	81	0
miR6029	Con-BN	bna-miR6029	TGGGGTTGTGATTTCAGGCTT	BnaA03g19090D	WEB family protein At2g40480	Y2048	-	-	3	816-837	828	4	2	11	101
				BnaC03g22710D	WEB family protein At2g40480	Y2048	-	-	4	1124-1145	1136	4	2	11	101
miR6030	Con-BN	bna-miR6030	TCCACCCATACCATACAGACCC	BnaA06g08260D	Disease resistance protein RFL1	RFL1	-	-	3	537-558	549	1	1	97	81
				BnaA07g17000D	Putative disease resistance protein At4g10780	DRL23	GO:0005524(ATP binding);GO:0017111(nucleoside-triphosphatase activity);GO:0006915(apoptosis);GO:0006952(defense response)	-	2	540-561	552	2	4	11	13
				BnaA08g24820D	Disease resistance protein RPS5	RPS5	GO:0005524(ATP binding);GO:0006915(apoptosis);GO:0009816(defense response to bacterium, incompatible interaction);GO:0009626(plant-type hypersensitive response)	-	3	528-549	540	0	0	387	1198
				BnaA09g10520D	Putative disease resistance protein At1g63350	DRL19	GO:0005524(ATP binding);GO:0006915(apoptosis);GO:0006952(defense response)	-	2	534-555	546	-	4	0	13
				BnaA09g13850D	Probable disease resistance protein At1g61190	DRL16	GO:0005524(ATP binding);GO:0006915(apoptosis);GO:0006952(defense response)	-	4	528-549	540	1	0	32	262
				BnaA09g46490D	Disease resistance protein RFL1	RFL1	-	-	4	534-555	546	0	0	264	472
				BnaA09g47230D	Disease resistance protein RFL1	RFL1	-	-	1.5	537-558	549	0	0	281	459
				BnaA10g01470D	Uncharacterized protein Os08g0359500	Y8359	-	-	3	975-995	986	2	2	290	222
				BnaAnng03870D	Disease resistance protein RPS5	RPS5	GO:0005524(ATP binding);GO:0006915(apoptosis);GO:0009816(defense response to bacterium, incompatible interaction);GO:0009626(plant-type hypersensitive response)	-	0.5	537-558	549	0	0	210	202
				BnaC05g01500D	Uncharacterized protein Os08g0359500	Y8359	-	-	3	1200-1220	1211	2	2	290	222
				BnaC05g09570D	Disease resistance protein RFL1	RFL1	-	-	3	537-558	549	0	1	97	81
				BnaC06g40800D	Probable disease resistance protein At1g12280	DRL1	GO:0005524(ATP binding);GO:0006915(apoptosis);GO:0006952(defense response)	-	3	24-45	36	1	2	65	81
				BnaC08g15420D	Disease resistance protein RPS5	RPS5	GO:0005524(ATP binding);GO:0006915(apoptosis);GO:0009816(defense response to bacterium, incompatible interaction);GO:0009626(plant-type hypersensitive response)	-	4	51-72	63	-	4	0	20
				BnaC08g15510D	Probable disease resistance protein At1g12290	DRL2	GO:0005524(ATP binding);GO:0006915(apoptosis);GO:0006952(defense response)	-	1	153-174	165	0	0	382	1171
				BnaC08g21550D	Disease resistance protein RPS5	RPS5	GO:0005524(ATP binding);GO:0006915(apoptosis);GO:0009816(defense response to bacterium, incompatible interaction);GO:0009626(plant-type hypersensitive response)	-	0.5	537-558	549	0	0	210	202
				BnaC08g40550D	Disease resistance protein RFL1	RFL1	-	-	2	459-480	471	0	0	264	472
				BnaC08g40560D	Disease resistance protein RFL1	RFL1	-	-	4	537-558	549	0	0	264	472
				BnaC08g41330D	Disease resistance protein RFL1	RFL1	-	-	1.5	537-558	549	0	0	119	217
				BnaC08g41340D	Probable disease resistance protein At1g12290	DRL2	GO:0005524(ATP binding);GO:0006915(apoptosis);GO:0006952(defense response)	-	3	543-564	555	3	4	11	13
				BnaC08g41420D	Putative disease resistance protein At4g10780	DRL23	GO:0005524(ATP binding);GO:0017111(nucleoside-triphosphatase activity);GO:0006915(apoptosis);GO:0006952(defense response)	-	4	501-522	513	3	-	11	0
				BnaC08g41710D	Probable disease resistance protein At1g12290	DRL2	GO:0005524(ATP binding);GO:0006915(apoptosis);GO:0006952(defense response)	-	1	510-531	522	0	0	382	1171
				BnaC08g48650D	Disease resistance protein RFL1	RFL1	-	-	1.5	537-558	549	0	0	210	202
				BnaC09g10770D	Putative disease resistance protein At1g63350	DRL19	GO:0005524(ATP binding);GO:0006915(apoptosis);GO:0006952(defense response)	-	2	534-555	546	-	4	0	13
				BnaCnng10060D	Probable disease resistance protein At1g61190	DRL16	GO:0005524(ATP binding);GO:0006915(apoptosis);GO:0006952(defense response)	-	4	527-548	539	2	0	32	262
				BnaCnng20410D	Probable disease resistance protein At1g12290	DRL2	GO:0005524(ATP binding);GO:0006915(apoptosis);GO:0006952(defense response)	-	2	540-561	552	4	-	5	0
				BnaCnng64090D	Disease resistance protein RPS5	RPS5	GO:0005524(ATP binding);GO:0006915(apoptosis);GO:0009816(defense response to bacterium, incompatible interaction);GO:0009626(plant-type hypersensitive response)	-	0.5	537-558	549	0	0	210	202
				BnaUnng00420D	Putative disease resistance protein At1g63350	DRL19	GO:0005524(ATP binding);GO:0006915(apoptosis);GO:0006952(defense response)	-	3	405-426	417	4	4	32	40
		bna-MIR6030-p5	GTCTGTATGTGTGGGCTGAGT	BnaC04g08160D	Interactor of constitutive active ROPs 2, chloroplastic	ICR2	GO:0009507(chloroplast);GO:0005874(microtubule)	ko04530(Tight junction);ko05416(Viral myocarditis)	3	1048-1067	1058	4	-	32	0
miR9410	Con-BA	bol-MIR9410-p3_1ss12TC	TGGAAGACTTTCCAGACGACT	BnaA09g40430D	Ferrochelatase-2, chloroplastic	HEMH2	GO:0031969(chloroplast membrane);GO:0009535(chloroplast thylakoid membrane);GO:0004325(ferrochelatase activity);GO:0006783(heme biosynthetic process)	ko00860(Porphyrin and chlorophyll metabolism)	4	2732-2753	2744	2	3	81	40
				BnaC08g01640D	Salt tolerance protein	STO	GO:0005634(nucleus);GO:0005515(protein binding);GO:0008270(zinc ion binding);GO:0009640(photomorphogenesis);GO:0080167(response to karrikin);GO:0009651(response to salt stress)	-	4	884-904	895	4	-	32	0
				BnaC08g32870D	Ferrochelatase-2, chloroplastic	HEMH2	GO:0031969(chloroplast membrane);GO:0009535(chloroplast thylakoid membrane);GO:0004325(ferrochelatase activity);GO:0006783(heme biosynthetic process)	ko00860(Porphyrin and chlorophyll metabolism)	4	2793-2814	2805	2	3	81	40
miR9557	Con-BA	bra-miR9557-5p	TTTTGCGTTTCAACTCGGTCC	BnaAnng21320D	-	-	-	-	4	542-562	553	4	-	16	0
miR9563	Con-BA	bra-MIR9563a-p3_1ss19AT	AGTTAAAAGTTAAGAGACT	BnaA01g03480D	ABC transporter I family member 10, chloroplastic	AB10I	GO:0009941(chloroplast envelope);GO:0005524(ATP binding);GO:0016887(ATPase activity);GO:0006810(transport)	ko02010(ABC transporters)	2.5	1583-1601	1592	4	-	32	0
				BnaA03g10310D	Protein VERNALIZATION INSENSITIVE 3	VIN3	GO:0005634(nucleus);GO:0003677(DNA binding);GO:0005515(protein binding);GO:0008270(zinc ion binding);GO:0006355(regulation of transcription, DNA-dependent);GO:0001666(response to hypoxia);GO:0006351(transcription, DNA-dependent);GO:0010048(vernalization response)	-	2	163-181	172	4	-	32	0
				BnaC02g27240D	-	-	-	-	4	501-518	509	-	4	0	40
		bra-MIR9563a-p5_1ss17CT	AGCGGAATATAAGAACTCGTCTCT	BnaC03g49530D	Ethylene-responsive transcription factor ABR1	ABR1	GO:0005634(nucleus);GO:0003677(DNA binding);GO:0003700(sequence-specific DNA binding transcription factor activity);GO:0009738(abscisic acid mediated signaling pathway);GO:0050832(defense response to fungus);GO:0009873(ethylene mediated signaling pathway);GO:0009788(negative regulation of abscisic acid mediated signaling pathway);GO:0009749(response to glucose stimulus);GO:0006970(response to osm…	-	2.5	1485-1508	1499	-	4	0	40
	Con-N	bra-miR9563a-5p_L+2R+1_1ss5CT	GAACTCGTCTCTTAATTTTTAACT	BnaC03g37420D	Ras-related protein RABA4d	RAA4D	GO:0045177(apical part of cell);GO:0030659(cytoplasmic vesicle membrane);GO:0070382(exocytic vesicle);GO:0090404(pollen tube tip);GO:0005525(GTP binding);GO:0019900(kinase binding);GO:0009860(pollen tube growth);GO:0015031(protein transport);GO:0080092(regulation of pollen tube growth);GO:0007264(small GTPase mediated signal transduction)	-	1.5	1200-1223	1214	4	-	32	0
				BnaC05g10850D	Sodium/hydrogen exchanger 8	NHX8	GO:0016021(integral to membrane);GO:0005886(plasma membrane);GO:0010348(lithium:hydrogen antiporter activity);GO:0010352(lithium ion export);GO:0006814(sodium ion transport)	-	1.5	964-987	978	-	4	0	40
				BnaC06g33960D	Nuclear transcription factor Y subunit A-3	NFYA3	GO:0016602(CCAAT-binding factor complex);GO:0003677(DNA binding);GO:0003700(sequence-specific DNA binding transcription factor activity)	-	4	541-564	555	0	-	97	0
		bra-MIR9563b-p5_1ss6GA	AACAGAATATAAGAACTCGTCTCT	BnaC03g49530D	Ethylene-responsive transcription factor ABR1	ABR1	GO:0005634(nucleus);GO:0003677(DNA binding);GO:0003700(sequence-specific DNA binding transcription factor activity);GO:0009738(abscisic acid mediated signaling pathway);GO:0050832(defense response to fungus);GO:0009873(ethylene mediated signaling pathway);GO:0009788(negative regulation of abscisic acid mediated signaling pathway);GO:0009749(response to glucose stimulus);GO:0006970(response to osm…	-	3.5	1485-1508	1499	-	4	0	40
miR9566	Con-N	bra-MIR9566-p5	AATACTTAGGCTCTCTCTAGG	BnaC03g68570D	Protease 2	PTRB	GO:0004252(serine-type endopeptidase activity);GO:0070008(serine-type exopeptidase activity);GO:0006508(proteolysis)	ko05142(Chagas disease)	4	2927-2946	2937	-	4	0	13
				BnaC05g43440D	-	-	-	-	4	3022-3041	3033	-	4	0	20
miR9568	Con-BA	bra-miR9568-5p_L-3R+2	GGATATCTTAGGATGAGGTTC	BnaC01g38880D	Threonine dehydratase biosynthetic, chloroplastic	THD1	GO:0009507(chloroplast);GO:0004794(L-threonine ammonia-lyase activity);GO:0030170(pyridoxal phosphate binding);GO:0009097(isoleucine biosynthetic process)	ko00260(Glycine, serine and threonine metabolism);ko00290(Valine, leucine and isoleucine biosynthesis)	2	835-855	846	-	4	0	20
[1]Name	Name regulation following Additional file 3: Table S3
[2]Symbol	The symbol of gene annotation
[3]GO	GO (Gene ontology) annotation; http://www.geneontology.org
[4]KEGG	KEGG (kyoto encyclopedia of genes and genomes) pathways annotation; http;//www.genome.jp/kegg
[5]Score	Alignment score
[6]Range	Alignment range
[7]Site	Degradome cleavage site
[8]Category	Degradome cleavage cateory
[9]TPB	Targets per billion = targets count*1.00E+09/total count

## Sheet: S8.2
Additional file 8: Table S8.2 - Targets of identified novel unique miRNA sequences in the WA and TG degradome libraries
Name[1]	Sequence	Transcript ID	Gene annotation	Symbol[2]	GO[3]	KEGG[4]	Score[5]	Range[6]	Site[7]	WA Category[8]	TG Category[8]	WA TPB[9]	TG TPB[9]
PC-3p-2	AGACTCAGACTCAGCCGCAGCCGC	BnaA07g14310D	CAX-interacting protein 4	CXIP4	GO:0005737(cytoplasm);GO:0005634(nucleus);GO:0003676(nucleic acid binding);GO:0008270(zinc ion binding);GO:0051928(positive regulation of calcium ion transport)	-	4	824-848	839	2	2	177	141
		BnaC06g06860D	-	-	-	-	4	553-576	567	2	-	65	0
PC-3p-13	GAGATATGAAGTTGGGTTGAAAC	BnaA01g01410D	-	-	-	-	2	3933-3955	3946	4	-	16	0
		BnaA02g35600D	Glycine-rich RNA-binding protein 5, mitochondrial	RBG5	-	-	2	377-399	390	4	-	16	0
PC-3p-17	GAGATATGAAGTTGGGTTT	BnaA01g01410D	-	-	-	-	1	3937-3955	3946	4	-	16	0
		BnaA02g35600D	Glycine-rich RNA-binding protein 5, mitochondrial	RBG5	-	-	1	381-399	390	4	-	16	0
		BnaA05g01030D	B3 domain-containing transcription factor NGA1	NGA1	GO:0005634(nucleus);GO:0003677(DNA binding);GO:0009908(flower development);GO:0048366(leaf development);GO:0006355(regulation of transcription, DNA-dependent);GO:0006351(transcription, DNA-dependent)	-	3	74-92	83	4	-	16	0
		BnaA06g30910D	BAG family molecular chaperone regulator 8, chloroplastic	BAG8	-	-	3.5	469-487	478	-	4	0	40
		BnaA08g19620D	Uridine-cytidine kinase C	UCKC	GO:0005524(ATP binding);GO:0016773(phosphotransferase activity, alcohol group as acceptor);GO:0004849(uridine kinase activity)	-	4	3738-3756	3747	-	4	0	20
		BnaA09g15400D	Calreticulin-1	CALR1	GO:0009507(chloroplast);GO:0005788(endoplasmic reticulum lumen);GO:0005739(mitochondrion);GO:0009506(plasmodesma);GO:0005774(vacuolar membrane);GO:0005509(calcium ion binding);GO:0005529(sugar binding);GO:0051082(unfolded protein binding);GO:0055074(calcium ion homeostasis);GO:0006457(protein folding);GO:0046686(response to cadmium ion);GO:0006979(response to oxidative stress);GO:0009651(response…	ko04145(Phagosome);ko04612(Antigen processing and presentation);ko05142(Chagas disease)	3	81-100	91	2	-	54	0
		BnaC01g43040D	Calreticulin-2	CALR2	GO:0005788(endoplasmic reticulum lumen);GO:0005739(mitochondrion);GO:0005773(vacuole);GO:0005509(calcium ion binding);GO:0005529(sugar binding);GO:0051082(unfolded protein binding);GO:0006457(protein folding);GO:0006979(response to oxidative stress);GO:0009651(response to salt stress)	ko04145(Phagosome);ko04612(Antigen processing and presentation);ko05142(Chagas disease)	4	42-61	52	2	-	22	0
		BnaC04g00580D	B3 domain-containing transcription factor NGA1	NGA1	GO:0005634(nucleus);GO:0003677(DNA binding);GO:0009908(flower development);GO:0048366(leaf development);GO:0006355(regulation of transcription, DNA-dependent);GO:0006351(transcription, DNA-dependent)	-	3	63-81	72	4	-	16	0
		BnaC09g16150D	Calreticulin-1	CALR1	GO:0009507(chloroplast);GO:0005788(endoplasmic reticulum lumen);GO:0005739(mitochondrion);GO:0009506(plasmodesma);GO:0005774(vacuolar membrane);GO:0005509(calcium ion binding);GO:0005529(sugar binding);GO:0051082(unfolded protein binding);GO:0055074(calcium ion homeostasis);GO:0006457(protein folding);GO:0046686(response to cadmium ion);GO:0006979(response to oxidative stress);GO:0009651(response…	ko04145(Phagosome);ko04612(Antigen processing and presentation);ko05142(Chagas disease)	3	100-118	109	3	-	32	0
		BnaCnng29680D	Uridine-cytidine kinase C	UCKC	GO:0005524(ATP binding);GO:0016773(phosphotransferase activity, alcohol group as acceptor);GO:0004849(uridine kinase activity)	-	4	7286-7304	7295	-	4	0	20
		BnaCnng44050D	-	-	-	-	3.5	847-864	856	2	-	32	0
		BnaCnng60990D	Cytochrome P450 705A20	C75AK	GO:0016021(integral to membrane);GO:0009055(electron carrier activity);GO:0020037(heme binding);GO:0004497(monooxygenase activity);GO:0016705(oxidoreductase activity, acting on paired donors, with incorporation or reduction of molecular oxygen)	ko00361(gamma-Hexachlorocyclohexane degradation);ko00626(Naphthalene and anthracene degradation);ko00903(Limonene and pinene degradation);ko00945(Stilbenoid, diarylheptanoid and gingerol biosynthesis)	4	702-719	711	4	-	8	0
PC-3p-21	ATATTCCGCTAAGAACTTCATTCT	BnaA09g37010D	Probable inactive receptor-like protein kinase At1g65250	Y1652	GO:0005524(ATP binding);GO:0004672(protein kinase activity)	-	1.5	21-44	35	4	-	16	0
		BnaC08g34350D	BEL1-like homeodomain protein 4	BLH4	GO:0005634(nucleus);GO:0043565(sequence-specific DNA binding);GO:0003700(sequence-specific DNA binding transcription factor activity);GO:0009965(leaf morphogenesis)	-	3.5	4244-4267	4258	4	-	16	0
PC-3p-22	TTATCCCGGACGACCTTAAAT	BnaA08g05330D	Serine/threonine-protein kinase fray2	FRAY2	GO:0005524(ATP binding);GO:0046872(metal ion binding);GO:0004674(protein serine/threonine kinase activity)	-	4	620-640	631	4	-	11	0
		BnaA08g30030D	Serine/threonine-protein kinase fray2	FRAY2	GO:0005524(ATP binding);GO:0046872(metal ion binding);GO:0004674(protein serine/threonine kinase activity)	-	4	620-640	631	4	-	11	0
		BnaC08g47330D	Serine/threonine-protein kinase fray2	FRAY2	GO:0005524(ATP binding);GO:0046872(metal ion binding);GO:0004674(protein serine/threonine kinase activity)	-	4	620-640	631	4	-	11	0
PC-3p-24	ATATTCCCCTAAAAACTCCACCCT	BnaA09g37010D	Probable inactive receptor-like protein kinase At1g65250	Y1652	GO:0005524(ATP binding);GO:0004672(protein kinase activity)	-	4	21-44	35	4	-	16	0
		BnaC08g34350D	BEL1-like homeodomain protein 4	BLH4	GO:0005634(nucleus);GO:0043565(sequence-specific DNA binding);GO:0003700(sequence-specific DNA binding transcription factor activity);GO:0009965(leaf morphogenesis)	-	3	4244-4267	4258	4	-	16	0
PC-3p-29	ATATTCTGCTAAGAACTCTACCCT	BnaA09g37010D	Probable inactive receptor-like protein kinase At1g65250	Y1652	GO:0005524(ATP binding);GO:0004672(protein kinase activity)	-	1.5	21-44	35	4	-	16	0
		BnaC08g34350D	BEL1-like homeodomain protein 4	BLH4	GO:0005634(nucleus);GO:0043565(sequence-specific DNA binding);GO:0003700(sequence-specific DNA binding transcription factor activity);GO:0009965(leaf morphogenesis)	-	3	4244-4267	4258	4	-	16	0
PC-3p-43	TGTATTTCCTCGGAATTGCCT	BnaA06g26880D	-	-	-	-	4	9114-9134	9125	4	2	16	40
		BnaC07g30080D	-	-	-	-	4	8535-8555	8546	4	2	16	40
PC-3p-44	AAAAACGACGTCGTCTTATCTTGT	BnaA02g35580D	Probable 3-hydroxyisobutyrate dehydrogenase-like 3, mitochondrial	3HID3	-	ko00280(Valine, leucine and isoleucine degradation)	4	200-222	213	2	-	97	0
PC-3p-52	ATATTCCGCTAAGAACTTCACTCT	BnaA09g37010D	Probable inactive receptor-like protein kinase At1g65250	Y1652	GO:0005524(ATP binding);GO:0004672(protein kinase activity)	-	1	21-44	35	4	-	16	0
		BnaC08g34350D	BEL1-like homeodomain protein 4	BLH4	GO:0005634(nucleus);GO:0043565(sequence-specific DNA binding);GO:0003700(sequence-specific DNA binding transcription factor activity);GO:0009965(leaf morphogenesis)	-	3	4244-4267	4258	4	-	16	0
PC-3p-53	ATCCATTAGTATCAGACGATC	BnaA05g19710D	Protein ALWAYS EARLY 3	ALY3	GO:0005634(nucleus);GO:0003677(DNA binding);GO:0005515(protein binding);GO:0006355(regulation of transcription, DNA-dependent)	-	2	7286-7307	7298	4	-	16	0
		BnaC05g30570D	Protein ALWAYS EARLY 3	ALY3	GO:0005634(nucleus);GO:0003677(DNA binding);GO:0005515(protein binding);GO:0006355(regulation of transcription, DNA-dependent)	-	2	7348-7369	7360	4	-	16	0
PC-3p-54	GAGATATGAAATTGGATTGGAGCA	BnaA01g01410D	-	-	-	-	3	3932-3955	3946	4	-	16	0
		BnaA02g35600D	Glycine-rich RNA-binding protein 5, mitochondrial	RBG5	-	-	3	376-399	390	4	-	16	0
PC-3p-64	ATATTCTGCTAAGAACTTCACCCT	BnaA09g37010D	Probable inactive receptor-like protein kinase At1g65250	Y1652	GO:0005524(ATP binding);GO:0004672(protein kinase activity)	-	1.5	21-44	35	4	-	16	0
		BnaC08g34350D	BEL1-like homeodomain protein 4	BLH4	GO:0005634(nucleus);GO:0043565(sequence-specific DNA binding);GO:0003700(sequence-specific DNA binding transcription factor activity);GO:0009965(leaf morphogenesis)	-	3.5	4244-4267	4258	4	-	16	0
PC-3p-66	ATATTCTGTTAAGAACCCCACCCT	BnaA09g37010D	Probable inactive receptor-like protein kinase At1g65250	Y1652	GO:0005524(ATP binding);GO:0004672(protein kinase activity)	-	3	21-44	35	4	-	16	0
PC-3p-69	GGAGTGAGATATGAAGTTGGGTTT	BnaC03g62400D	Phosphoserine aminotransferase, chloroplastic	SERC	GO:0009570(chloroplast stroma);GO:0004648(O-phospho-L-serine:2-oxoglutarate aminotransferase activity);GO:0030170(pyridoxal phosphate binding);GO:0006564(L-serine biosynthetic process)	ko00260(Glycine, serine and threonine metabolism);ko00750(Vitamin B6 metabolism)	4	61-84	75	-	4	0	20
PC-3p-70	GAGATATGGAGTTGGGTTTGAGC	BnaA01g01410D	-	-	-	-	2	3933-3955	3946	4	-	16	0
		BnaA02g35600D	Glycine-rich RNA-binding protein 5, mitochondrial	RBG5	-	-	2	377-399	390	4	-	16	0
PC-3p-72	AGAGTCGGGTTCTTATATTCTGCT	BnaC02g02110D	Tropinone reductase homolog At1g07440	TRNH1	GO:0005488(binding);GO:0016491(oxidoreductase activity);GO:0046686(response to cadmium ion);GO:0080167(response to karrikin)	ko00960(Tropane, piperidine and pyridine alkaloid biosynthesis)	2.5	726-749	740	2	-	30	0
		BnaC02g33350D	Tonoplast dicarboxylate transporter	TDT	GO:0016021(integral to membrane);GO:0005774(vacuolar membrane);GO:0015140(malate transmembrane transporter activity);GO:0051453(regulation of intracellular pH);GO:0006814(sodium ion transport)	-	3.5	1792-1815	1806	2	-	30	0
		BnaC04g09330D	BEL1-like homeodomain protein 1	BLH1	GO:0005737(cytoplasm);GO:0005634(nucleus);GO:0046982(protein heterodimerization activity);GO:0042803(protein homodimerization activity);GO:0043565(sequence-specific DNA binding);GO:0003700(sequence-specific DNA binding transcription factor activity);GO:0010197(polar nucleus fusion);GO:0009737(response to abscisic acid stimulus);GO:0010201(response to continuous far red light stimulus by the high-…	-	2.5	1592-1615	1606	3	-	30	0
		BnaC05g00920D	-	-	-	-	3.5	521-544	535	4	-	8	0
PC-3p-74	AGAGACGGATTCTTATATTCTGCT	BnaA03g57160D	Thioredoxin M-type, chloroplastic	TRXM	GO:0009507(chloroplast);GO:0009055(electron carrier activity);GO:0015035(protein disulfide oxidoreductase activity);GO:0045454(cell redox homeostasis);GO:0022900(electron transport chain);GO:0006662(glycerol ether metabolic process);GO:0006810(transport)	-	3	242-264	255	2	2	161	162
		BnaA09g01610D	Thioredoxin M2, chloroplastic	TRXM2	GO:0009570(chloroplast stroma);GO:0009535(chloroplast thylakoid membrane);GO:0009055(electron carrier activity);GO:0008047(enzyme activator activity);GO:0015035(protein disulfide oxidoreductase activity);GO:0045454(cell redox homeostasis);GO:0022900(electron transport chain);GO:0006662(glycerol ether metabolic process);GO:0006979(response to oxidative stress);GO:0006810(transport)	-	4	166-188	179	2	2	129	162
		BnaC02g02110D	Tropinone reductase homolog At1g07440	TRNH1	GO:0005488(binding);GO:0016491(oxidoreductase activity);GO:0046686(response to cadmium ion);GO:0080167(response to karrikin)	ko00960(Tropane, piperidine and pyridine alkaloid biosynthesis)	2.5	726-749	740	2	-	30	0
		BnaC02g33350D	Tonoplast dicarboxylate transporter	TDT	GO:0016021(integral to membrane);GO:0005774(vacuolar membrane);GO:0015140(malate transmembrane transporter activity);GO:0051453(regulation of intracellular pH);GO:0006814(sodium ion transport)	-	3.5	1792-1815	1806	2	-	30	0
		BnaC04g09330D	BEL1-like homeodomain protein 1	BLH1	GO:0005737(cytoplasm);GO:0005634(nucleus);GO:0046982(protein heterodimerization activity);GO:0042803(protein homodimerization activity);GO:0043565(sequence-specific DNA binding);GO:0003700(sequence-specific DNA binding transcription factor activity);GO:0010197(polar nucleus fusion);GO:0009737(response to abscisic acid stimulus);GO:0010201(response to continuous far red light stimulus by the high-…	-	2.5	1592-1615	1606	3	-	30	0
		BnaC05g00920D	-	-	-	-	3.5	521-544	535	4	-	8	0
		BnaC09g00770D	Thioredoxin M-type, chloroplastic	TRXM	GO:0009507(chloroplast);GO:0009055(electron carrier activity);GO:0015035(protein disulfide oxidoreductase activity);GO:0045454(cell redox homeostasis);GO:0022900(electron transport chain);GO:0006662(glycerol ether metabolic process);GO:0006810(transport)	-	4	164-186	177	2	2	129	162
		BnaCnng16050D	Thioredoxin M-type, chloroplastic	TRXM	GO:0009507(chloroplast);GO:0009055(electron carrier activity);GO:0015035(protein disulfide oxidoreductase activity);GO:0045454(cell redox homeostasis);GO:0022900(electron transport chain);GO:0006662(glycerol ether metabolic process);GO:0006810(transport)	-	3	272-294	285	2	2	97	323
PC-3p-75	ATATTCTTCTAAGAACTCCGTCCT	BnaA09g37010D	Probable inactive receptor-like protein kinase At1g65250	Y1652	GO:0005524(ATP binding);GO:0004672(protein kinase activity)	-	4	21-44	35	4	-	16	0
PC-3p-85	GAGATATGGAGTTGGGTTGAAGCA	BnaA01g01410D	-	-	-	-	2	3932-3955	3946	4	-	16	0
		BnaA02g35600D	Glycine-rich RNA-binding protein 5, mitochondrial	RBG5	-	-	2	376-399	390	4	-	16	0
PC-3p-88	ATATTCCGTTAAGAACTCCACCCT	BnaA09g37010D	Probable inactive receptor-like protein kinase At1g65250	Y1652	GO:0005524(ATP binding);GO:0004672(protein kinase activity)	-	1	21-44	35	4	-	16	0
		BnaC08g34350D	BEL1-like homeodomain protein 4	BLH4	GO:0005634(nucleus);GO:0043565(sequence-specific DNA binding);GO:0003700(sequence-specific DNA binding transcription factor activity);GO:0009965(leaf morphogenesis)	-	3	4244-4267	4258	4	-	16	0
PC-3p-103	ATATTCCGCTAAGAACTTCATCCT	BnaA09g37010D	Probable inactive receptor-like protein kinase At1g65250	Y1652	GO:0005524(ATP binding);GO:0004672(protein kinase activity)	-	1	21-44	35	4	-	16	0
		BnaC08g34350D	BEL1-like homeodomain protein 4	BLH4	GO:0005634(nucleus);GO:0043565(sequence-specific DNA binding);GO:0003700(sequence-specific DNA binding transcription factor activity);GO:0009965(leaf morphogenesis)	-	3	4244-4267	4258	4	-	16	0
PC-3p-105	AACTTCCGCTAAGAACTCCACCCT	BnaA09g37010D	Probable inactive receptor-like protein kinase At1g65250	Y1652	GO:0005524(ATP binding);GO:0004672(protein kinase activity)	-	4	21-44	35	4	-	16	0
PC-3p-110	ATATTCCGTTAATAACTCCACCCT	BnaA09g37010D	Probable inactive receptor-like protein kinase At1g65250	Y1652	GO:0005524(ATP binding);GO:0004672(protein kinase activity)	-	3	21-44	35	4	-	16	0
		BnaC08g34350D	BEL1-like homeodomain protein 4	BLH4	GO:0005634(nucleus);GO:0043565(sequence-specific DNA binding);GO:0003700(sequence-specific DNA binding transcription factor activity);GO:0009965(leaf morphogenesis)	-	4	4244-4267	4258	4	-	16	0
PC-3p-119	TAACTTCTGCTAAGAACTCATCCT	BnaC06g06630D	Protein LURP-one-related 2	LOR2	GO:0044237(cellular metabolic process)	-	4	519-541	532	-	4	0	13
PC-3p-120	AACTTCTGCTAAGAACCTCACTCT	BnaA10g24400D	-	-	-	-	4	1114-1138	1129	-	4	0	20
		BnaC09g49000D	-	-	-	-	4	1224-1248	1239	-	4	0	20
		BnaCnng45610D	F-box protein SKIP31	SKI31	-	-	3.5	519-541	533	2	-	32	0
PC-3p-124	AGAGACTGTATTTTATATTAC	BnaA05g32730D	Inhibitor of Bruton tyrosine kinase	IBTK	GO:0005737(cytoplasm);GO:0016020(membrane)	ko04120(Ubiquitin mediated proteolysis)	4	117-136	128	4	4	16	20
		BnaC02g27570D	F-box protein At4g00755	FB345	-	-	3.5	576-597	588	2	-	32	0
		BnaC05g48030D	-		-	-	4	432-451	443	4	4	16	20
PC-3p-125	CGCTGCAGCGCTGTGAACCT	BnaA10g03200D	Probable beta-1,3-galactosyltransferase 2	B3GT2	GO:0000139(Golgi membrane);GO:0016021(integral to membrane);GO:0008378(galactosyltransferase activity);GO:0006486(protein glycosylation)	-	3.5	2573-2593	2584	4	-	16	0
		BnaC05g03190D	Probable beta-1,3-galactosyltransferase 2	B3GT2	GO:0000139(Golgi membrane);GO:0016021(integral to membrane);GO:0008378(galactosyltransferase activity);GO:0006486(protein glycosylation)	-	3.5	2551-2571	2562	4	-	16	0
PC-3p-129	GAAATGGAGTAGGGTTGGAAC	BnaA09g46120D	Probable inactive purple acid phosphatase 1	PPA1	GO:0005576(extracellular region);GO:0003993(acid phosphatase activity);GO:0046872(metal ion binding)	-	3.5	1416-1435	1426	4	-	16	0
PC-3p-132	GAGATATGAAGTTGGGTTGAAACA	BnaA01g01410D	-	-	-	-	2	3932-3955	3946	4	-	16	0
		BnaA02g35600D	Glycine-rich RNA-binding protein 5, mitochondrial	RBG5	-	-	2	376-399	390	4	-	16	0
PC-3p-136	ATATTCCGTTAAGAACTTCGCCCT	BnaA09g37010D	Probable inactive receptor-like protein kinase At1g65250	Y1652	GO:0005524(ATP binding);GO:0004672(protein kinase activity)	-	2	21-44	35	4	-	16	0
		BnaC08g34350D	BEL1-like homeodomain protein 4	BLH4	GO:0005634(nucleus);GO:0043565(sequence-specific DNA binding);GO:0003700(sequence-specific DNA binding transcription factor activity);GO:0009965(leaf morphogenesis)	-	4	4244-4267	4258	4	-	16	0
PC-3p-142	GAAATGGAGTAGGATTGGAGC	BnaA09g46120D	Probable inactive purple acid phosphatase 1	PPA1	GO:0005576(extracellular region);GO:0003993(acid phosphatase activity);GO:0046872(metal ion binding)	-	3.5	1416-1435	1426	4	-	16	0
PC-3p-144	GCAAGTCGTCCTTGGCTATT	BnaA05g05140D	Remorin	REMO	GO:0005886(plasma membrane);GO:0005515(protein binding)	-	4	1638-1656	1648	4	4	16	20
		BnaA06g15330D	-	-	-	-	3.5	1520-1538	1529	2	2	290	404
		BnaC04g04520D	Remorin	REMO	GO:0005886(plasma membrane);GO:0005515(protein binding)	-	4	1841-1859	1851	4	4	16	20
		BnaC05g16910D	-	-	-	-	3.5	1541-1559	1550	2	2	129	81
PC-3p-145	TTTCCCCGGACGACTTTAAAT	BnaA05g09300D	-	-	-	-	3.5	1722-1741	1732	4	-	5	0
		BnaA07g17960D	Serine/threonine-protein kinase EDR1	EDR1	-	ko04010(MAPK signaling pathway);ko04530(Tight junction)	3.5	5914-5933	5924	4	-	5	0
		BnaC02g27290D	DNA mismatch repair protein PMS1	PMS1	-	ko03430(Mismatch repair)	3.5	752-771	762	4	-	5	0
		BnaC02g47320D	-	-	-	-	3.5	24-43	34	4	-	5	0
		BnaC04g55480D	Guanylate kinase	KGUA	GO:0005737(cytoplasm);GO:0005524(ATP binding);GO:0004385(guanylate kinase activity);GO:0046037(GMP metabolic process)	ko00230(Purine metabolism)	3.5	475-494	485	4	-	5	0
PC-3p-149	GAGATTTGAAGTTGGGTTGGAGCA	BnaA01g01410D	-	-	-	-	2	3932-3955	3946	4	-	16	0
		BnaA02g35600D	Glycine-rich RNA-binding protein 5, mitochondrial	RBG5	-	-	2	376-399	390	4	-	16	0
PC-5p-4	AAACCGTCTGTTAACTTTTAACTA	BnaC08g25010D	-	-	-	-	4	842-865	856	4	2	32	81
PC-5p-7	AGCGGAATATAAGAAATCGTCTCT	BnaC03g49530D	Ethylene-responsive transcription factor ABR1	ABR1	GO:0005634(nucleus);GO:0003677(DNA binding);GO:0003700(sequence-specific DNA binding transcription factor activity);GO:0009738(abscisic acid mediated signaling pathway);GO:0050832(defense response to fungus);GO:0009873(ethylene mediated signaling pathway);GO:0009788(negative regulation of abscisic acid mediated signaling pathway);GO:0009749(response to glucose stimulus);GO:0006970(response to osm…	-	1.5	1485-1508	1499	-	4	0	40
PC-5p-10	AGCGGAATATAAGAATTTATCTCT	BnaC03g49530D	Ethylene-responsive transcription factor ABR1	ABR1	GO:0005634(nucleus);GO:0003677(DNA binding);GO:0003700(sequence-specific DNA binding transcription factor activity);GO:0009738(abscisic acid mediated signaling pathway);GO:0050832(defense response to fungus);GO:0009873(ethylene mediated signaling pathway);GO:0009788(negative regulation of abscisic acid mediated signaling pathway);GO:0009749(response to glucose stimulus);GO:0006970(response to osm…	-	4	1485-1508	1499	-	4	0	40
PC-5p-12	AGCGGAATATAAGAATTCGTTTCT	BnaC03g49530D	Ethylene-responsive transcription factor ABR1	ABR1	GO:0005634(nucleus);GO:0003677(DNA binding);GO:0003700(sequence-specific DNA binding transcription factor activity);GO:0009738(abscisic acid mediated signaling pathway);GO:0050832(defense response to fungus);GO:0009873(ethylene mediated signaling pathway);GO:0009788(negative regulation of abscisic acid mediated signaling pathway);GO:0009749(response to glucose stimulus);GO:0006970(response to osm…	-	3	1485-1508	1499	-	4	0	40
PC-5p-19	ACCGGAATATAAGAATCTGTCTCT	BnaC03g49530D	Ethylene-responsive transcription factor ABR1	ABR1	GO:0005634(nucleus);GO:0003677(DNA binding);GO:0003700(sequence-specific DNA binding transcription factor activity);GO:0009738(abscisic acid mediated signaling pathway);GO:0050832(defense response to fungus);GO:0009873(ethylene mediated signaling pathway);GO:0009788(negative regulation of abscisic acid mediated signaling pathway);GO:0009749(response to glucose stimulus);GO:0006970(response to osm…	-	3.5	1485-1508	1499	-	4	0	40
PC-5p-23	AGCGGAATATAAGAACCTGACTCT	BnaC03g49530D	Ethylene-responsive transcription factor ABR1	ABR1	GO:0005634(nucleus);GO:0003677(DNA binding);GO:0003700(sequence-specific DNA binding transcription factor activity);GO:0009738(abscisic acid mediated signaling pathway);GO:0050832(defense response to fungus);GO:0009873(ethylene mediated signaling pathway);GO:0009788(negative regulation of abscisic acid mediated signaling pathway);GO:0009749(response to glucose stimulus);GO:0006970(response to osm…	-	3.5	1485-1508	1499	-	4	0	40
PC-5p-26	AAAACCCTGAACCCTTGGATAAAC	BnaC01g17760D	Oxysterol-binding protein-related protein 4A	ORP4A	GO:0008289(lipid binding);GO:0006869(lipid transport)	-	3	2101-2124	2115	4	-	16	0
		BnaC09g05390D	Inositol polyphosphate multikinase beta	IPMKB	GO:0005634(nucleus);GO:0005524(ATP binding);GO:0047326(inositol tetrakisphosphate 5-kinase activity);GO:0008440(inositol trisphosphate 3-kinase activity);GO:0000823(inositol trisphosphate 6-kinase activity);GO:0010264(myo-inositol hexakisphosphate biosynthetic process);GO:0006355(regulation of transcription, DNA-dependent)	-	3.5	852-874	865	4	-	32	0
PC-5p-27	GAGTGGAAAATGGAGTGATGAACA	BnaAnng08550D	Squamosa promoter-binding-like protein 7	SPL7	GO:0005634(nucleus);GO:0003677(DNA binding);GO:0046872(metal ion binding);GO:0055070(copper ion homeostasis);GO:0006355(regulation of transcription, DNA-dependent);GO:0006351(transcription, DNA-dependent)	-	3.5	742-765	756	4	0	32	81
PC-5p-33	AGCGGAATATAAGAAATTGTCTCT	BnaC03g49530D	Ethylene-responsive transcription factor ABR1	ABR1	GO:0005634(nucleus);GO:0003677(DNA binding);GO:0003700(sequence-specific DNA binding transcription factor activity);GO:0009738(abscisic acid mediated signaling pathway);GO:0050832(defense response to fungus);GO:0009873(ethylene mediated signaling pathway);GO:0009788(negative regulation of abscisic acid mediated signaling pathway);GO:0009749(response to glucose stimulus);GO:0006970(response to osm…	-	2	1485-1508	1499	-	4	0	40
PC-5p-36	GTTTTCGTTCTTGTGTGAAGC	BnaA03g11760D	Formin-like protein 5	FH5	GO:0005618(cell wall);GO:0016021(integral to membrane);GO:0009524(phragmoplast);GO:0003779(actin binding);GO:0030041(actin filament polymerization);GO:0045010(actin nucleation);GO:0009960(endosperm development);GO:0048317(seed morphogenesis)	ko04310(Wnt signaling pathway)	4	1606-1626	1617	4	-	16	0
		BnaA03g24920D	PGR5-like protein 1B, chloroplastic	PGL1B	GO:0009535(chloroplast thylakoid membrane);GO:0016021(integral to membrane);GO:0009773(photosynthetic electron transport in photosystem I);GO:0006810(transport)	-	4	707-726	717	2	2	32	61
		BnaC03g14440D	Formin-like protein 5	FH5	GO:0005618(cell wall);GO:0016021(integral to membrane);GO:0009524(phragmoplast);GO:0003779(actin binding);GO:0030041(actin filament polymerization);GO:0045010(actin nucleation);GO:0009960(endosperm development);GO:0048317(seed morphogenesis)	ko04310(Wnt signaling pathway)	4	1593-1613	1604	4	-	16	0
		BnaC03g45540D	Putative proline-rich receptor-like protein kinase PERK11	PEK11	GO:0016021(integral to membrane);GO:0005886(plasma membrane);GO:0005524(ATP binding);GO:0004674(protein serine/threonine kinase activity)	-	4	38-58	49	-	2	0	121
		BnaC03g72980D	PGR5-like protein 1B, chloroplastic	PGL1B	GO:0009535(chloroplast thylakoid membrane);GO:0016021(integral to membrane);GO:0009773(photosynthetic electron transport in photosystem I);GO:0006810(transport)	-	4	658-677	668	2	2	32	61
PC-5p-47	ATAAGATGGATGAGCCACTCCACT	BnaC09g07320D	Uncharacterized protein ycf36	YCF36	GO:0009507(chloroplast)	-	3.5	1968-1991	1982	2	2	258	81
PC-5p-50	ATCGGAATATAAGAACTCGTCTCT	BnaC03g49530D	Ethylene-responsive transcription factor ABR1	ABR1	GO:0005634(nucleus);GO:0003677(DNA binding);GO:0003700(sequence-specific DNA binding transcription factor activity);GO:0009738(abscisic acid mediated signaling pathway);GO:0050832(defense response to fungus);GO:0009873(ethylene mediated signaling pathway);GO:0009788(negative regulation of abscisic acid mediated signaling pathway);GO:0009749(response to glucose stimulus);GO:0006970(response to osm…	-	3.5	1485-1508	1499	-	4	0	40
PC-5p-51	ATCGGAATATAAGAATCTGTCTCT	BnaC03g49530D	Ethylene-responsive transcription factor ABR1	ABR1	GO:0005634(nucleus);GO:0003677(DNA binding);GO:0003700(sequence-specific DNA binding transcription factor activity);GO:0009738(abscisic acid mediated signaling pathway);GO:0050832(defense response to fungus);GO:0009873(ethylene mediated signaling pathway);GO:0009788(negative regulation of abscisic acid mediated signaling pathway);GO:0009749(response to glucose stimulus);GO:0006970(response to osm…	-	3.5	1485-1508	1499	-	4	0	40
PC-5p-53	AGCGGAATATAAGAACTCGGCTCT	BnaC03g49530D	Ethylene-responsive transcription factor ABR1	ABR1	GO:0005634(nucleus);GO:0003677(DNA binding);GO:0003700(sequence-specific DNA binding transcription factor activity);GO:0009738(abscisic acid mediated signaling pathway);GO:0050832(defense response to fungus);GO:0009873(ethylene mediated signaling pathway);GO:0009788(negative regulation of abscisic acid mediated signaling pathway);GO:0009749(response to glucose stimulus);GO:0006970(response to osm…	-	3.5	1485-1508	1499	-	4	0	40
PC-5p-58	ATGATTAACCCGGGTTCTTAGGAT	BnaA02g32390D	-	-	-	-	3.5	430-454	445	-	4	0	40
PC-5p-59	AGCGGAATATAAGAACTCGTCTTT	BnaC03g49530D	Ethylene-responsive transcription factor ABR1	ABR1	GO:0005634(nucleus);GO:0003677(DNA binding);GO:0003700(sequence-specific DNA binding transcription factor activity);GO:0009738(abscisic acid mediated signaling pathway);GO:0050832(defense response to fungus);GO:0009873(ethylene mediated signaling pathway);GO:0009788(negative regulation of abscisic acid mediated signaling pathway);GO:0009749(response to glucose stimulus);GO:0006970(response to osm…	-	3	1485-1508	1499	-	4	0	40
PC-5p-61	GAATCCGACTCTTAACTTTTAACT	BnaC03g37420D	Ras-related protein RABA4d	RAA4D	GO:0045177(apical part of cell);GO:0030659(cytoplasmic vesicle membrane);GO:0070382(exocytic vesicle);GO:0090404(pollen tube tip);GO:0005525(GTP binding);GO:0019900(kinase binding);GO:0009860(pollen tube growth);GO:0015031(protein transport);GO:0080092(regulation of pollen tube growth);GO:0007264(small GTPase mediated signal transduction)	-	3	1200-1223	1214	4	-	32	0
		BnaC05g10850D	Sodium/hydrogen exchanger 8	NHX8	GO:0016021(integral to membrane);GO:0005886(plasma membrane);GO:0010348(lithium:hydrogen antiporter activity);GO:0010352(lithium ion export);GO:0006814(sodium ion transport)	-	3	964-987	978	-	4	0	40
PC-5p-62	GATTAACCCGGAGTTCTTAGATTG	BnaC04g51140D	Beta-glucosidase 11	BGL11	GO:0008422(beta-glucosidase activity);GO:0043169(cation binding);GO:0005975(carbohydrate metabolic process)	ko00460(Cyanoamino acid metabolism);ko00500(Starch and sucrose metabolism);ko00940(Phenylpropanoid biosynthesis)	0	5642-5665	5656	4	-	32	0
PC-5p-64	AGCCGGACGACTTAGAATTAAGTC	BnaC01g28500D	AP-1 complex subunit gamma-2	AP1G2	GO:0030131(clathrin adaptor complex);GO:0030665(clathrin coated vesicle membrane);GO:0044431(Golgi apparatus part);GO:0005488(binding);GO:0008565(protein transporter activity);GO:0006897(endocytosis);GO:0006886(intracellular protein transport)	ko04142(Lysosome)	4	6111-6133	6124	4	-	16	0
PC-5p-65	GACCCACAAGCATTGCAACTG	BnaA01g34710D	Inositol-3-phosphate synthase	INO1	GO:0005737(cytoplasm);GO:0005488(binding);GO:0004512(inositol-3-phosphate synthase activity);GO:0006021(inositol biosynthetic process);GO:0008654(phospholipid biosynthetic process)	ko00521(Streptomycin biosynthesis);ko00562(Inositol phosphate metabolism)	4	322-341	332	2	2	97	101
		BnaA03g13430D	-	-	-	-	4	825-846	836	4	-	5	0
		BnaC01g00680D	Inositol-3-phosphate synthase	INO1	GO:0005737(cytoplasm);GO:0005488(binding);GO:0004512(inositol-3-phosphate synthase activity);GO:0006021(inositol biosynthetic process);GO:0008654(phospholipid biosynthetic process)	ko00521(Streptomycin biosynthesis);ko00562(Inositol phosphate metabolism)	4	331-350	341	2	2	97	101
		BnaC03g16240D	-	-	-	-	4	853-874	864	4	-	5	0
PC-5p-69	AACGGAATATAAGAACCAGTCTCT	BnaC03g49530D	Ethylene-responsive transcription factor ABR1	ABR1	GO:0005634(nucleus);GO:0003677(DNA binding);GO:0003700(sequence-specific DNA binding transcription factor activity);GO:0009738(abscisic acid mediated signaling pathway);GO:0050832(defense response to fungus);GO:0009873(ethylene mediated signaling pathway);GO:0009788(negative regulation of abscisic acid mediated signaling pathway);GO:0009749(response to glucose stimulus);GO:0006970(response to osm…	-	2	1485-1508	1499	-	4	0	40
PC-5p-72	AAGTCAACCCGCTGGTCAAAGATT	BnaCnng72190D	Putative phospholipid:diacylglycerol acyltransferase 2	PDAT2	GO:0016021(integral to membrane);GO:0008374(O-acyltransferase activity);GO:0046027(phospholipid:diacylglycerol acyltransferase activity);GO:0006071(glycerol metabolic process);GO:0008610(lipid biosynthetic process)	-	2.5	157-180	171	-	2	0	81
PC-5p-81	AAAACCCTGAACCCTTGGATAAAT	BnaC01g17760D	Oxysterol-binding protein-related protein 4A	ORP4A	GO:0008289(lipid binding);GO:0006869(lipid transport)	-	3.5	2101-2124	2115	4	-	16	0
		BnaC09g05390D	Inositol polyphosphate multikinase beta	IPMKB	GO:0005634(nucleus);GO:0005524(ATP binding);GO:0047326(inositol tetrakisphosphate 5-kinase activity);GO:0008440(inositol trisphosphate 3-kinase activity);GO:0000823(inositol trisphosphate 6-kinase activity);GO:0010264(myo-inositol hexakisphosphate biosynthetic process);GO:0006355(regulation of transcription, DNA-dependent)	-	4	852-874	865	4	-	32	0
PC-5p-83	AGCGGAATATAAGAATCTCTCT	BnaC03g49530D	Ethylene-responsive transcription factor ABR1	ABR1	GO:0005634(nucleus);GO:0003677(DNA binding);GO:0003700(sequence-specific DNA binding transcription factor activity);GO:0009738(abscisic acid mediated signaling pathway);GO:0050832(defense response to fungus);GO:0009873(ethylene mediated signaling pathway);GO:0009788(negative regulation of abscisic acid mediated signaling pathway);GO:0009749(response to glucose stimulus);GO:0006970(response to osm…	-	3.5	1487-1508	1499	-	4	0	40
PC-5p-86	AGCGGAATATAAGGAACCATCTCT	BnaC03g49530D	Ethylene-responsive transcription factor ABR1	ABR1	GO:0005634(nucleus);GO:0003677(DNA binding);GO:0003700(sequence-specific DNA binding transcription factor activity);GO:0009738(abscisic acid mediated signaling pathway);GO:0050832(defense response to fungus);GO:0009873(ethylene mediated signaling pathway);GO:0009788(negative regulation of abscisic acid mediated signaling pathway);GO:0009749(response to glucose stimulus);GO:0006970(response to osm…	-	2.5	1485-1508	1499	-	4	0	40
PC-5p-92	ATCGGAATATAAGAAACTGTCTCT	BnaC03g49530D	Ethylene-responsive transcription factor ABR1	ABR1	GO:0005634(nucleus);GO:0003677(DNA binding);GO:0003700(sequence-specific DNA binding transcription factor activity);GO:0009738(abscisic acid mediated signaling pathway);GO:0050832(defense response to fungus);GO:0009873(ethylene mediated signaling pathway);GO:0009788(negative regulation of abscisic acid mediated signaling pathway);GO:0009749(response to glucose stimulus);GO:0006970(response to osm…	-	2.5	1485-1508	1499	-	4	0	40
PC-5p-94	AACGGAATATAAGAATTTGACTCT	BnaC03g49530D	Ethylene-responsive transcription factor ABR1	ABR1	GO:0005634(nucleus);GO:0003677(DNA binding);GO:0003700(sequence-specific DNA binding transcription factor activity);GO:0009738(abscisic acid mediated signaling pathway);GO:0050832(defense response to fungus);GO:0009873(ethylene mediated signaling pathway);GO:0009788(negative regulation of abscisic acid mediated signaling pathway);GO:0009749(response to glucose stimulus);GO:0006970(response to osm…	-	3	1485-1508	1499	-	4	0	40
PC-5p-96	AACCGTCTGTTAACTTTTAACTA	BnaA03g31900D	Lysine--tRNA ligase	SYK	GO:0005829(cytosol);GO:0009506(plasmodesma);GO:0005524(ATP binding);GO:0004824(lysine-tRNA ligase activity);GO:0003676(nucleic acid binding);GO:0006430(lysyl-tRNA aminoacylation)	ko00970(Aminoacyl-tRNA biosynthesis)	3.5	1922-1945	1936	-	4	0	10
		BnaC03g37420D	Ras-related protein RABA4d	RAA4D	GO:0045177(apical part of cell);GO:0030659(cytoplasmic vesicle membrane);GO:0070382(exocytic vesicle);GO:0090404(pollen tube tip);GO:0005525(GTP binding);GO:0019900(kinase binding);GO:0009860(pollen tube growth);GO:0015031(protein transport);GO:0080092(regulation of pollen tube growth);GO:0007264(small GTPase mediated signal transduction)	-	4	1199-1221	1212	4	-	32	0
		BnaC04g11070D	50S ribosomal protein L28, chloroplastic	RK28	GO:0009507(chloroplast);GO:0016020(membrane);GO:0009547(plastid ribosome);GO:0003735(structural constituent of ribosome);GO:0006412(translation)	ko03010(Ribosome)	4	347-369	360	4	-	32	0
PC-5p-98	ACCGGAATATAAGAAACTGTCTCT	BnaC03g49530D	Ethylene-responsive transcription factor ABR1	ABR1	GO:0005634(nucleus);GO:0003677(DNA binding);GO:0003700(sequence-specific DNA binding transcription factor activity);GO:0009738(abscisic acid mediated signaling pathway);GO:0050832(defense response to fungus);GO:0009873(ethylene mediated signaling pathway);GO:0009788(negative regulation of abscisic acid mediated signaling pathway);GO:0009749(response to glucose stimulus);GO:0006970(response to osm…	-	2.5	1485-1508	1499	-	4	0	40
PC-5p-99	GTTTTTAGCGGAATATAAGAACCT	BnaC04g40760D	Omega-3 fatty acid desaturase, endoplasmic reticulum	FAD3E	GO:0005789(endoplasmic reticulum membrane);GO:0016021(integral to membrane);GO:0016717(oxidoreductase activity, acting on paired donors, with oxidation of a pair of donors resulting in the reduction of molecular oxygen to two molecules of water);GO:0006633(fatty acid biosynthetic process)	ko01040(Biosynthesis of unsaturated fatty acids)	2.5	1668-1691	1682	2	-	65	0
PC-5p-100	GTTCCGACGGAAAATGAATTCCTC	BnaC01g41010D	Bifunctional aspartokinase/homoserine dehydrogenase 2, chloroplastic	AKH2	GO:0009507(chloroplast);GO:0016597(amino acid binding);GO:0004072(aspartate kinase activity);GO:0005524(ATP binding);GO:0004412(homoserine dehydrogenase activity);GO:0050661(NADP binding);GO:0009086(methionine biosynthetic process)	ko00260(Glycine, serine and threonine metabolism);ko00270(Cysteine and methionine metabolism);ko00300(Lysine biosynthesis)	1.5	4148-4171	4162	2	4	16	10
		BnaC03g24840D	Putative F-box protein At1g46984	FB36	-	-	1.5	4816-4839	4830	2	4	16	10
		BnaC03g39500D	BAHD acyltransferase At3g29680	BAHD2	-	ko00230(Purine metabolism)	1.5	5886-5909	5900	-	0	0	81
		BnaC07g17880D	-	-	-	-	1.5	328-351	342	2	4	16	10
		BnaC09g30070D	-	-	-	-	1.5	1154-1177	1168	2	4	16	10
PC-5p-101	AGTATGCAAGTGTGAGGACCATT	BnaC06g22510D	-	-	-	-	4	4093-4114	4106	4	-	8	0
PC-5p-102	AGCGGAATATAAGAATTTGTCTCT	BnaC03g49530D	Ethylene-responsive transcription factor ABR1	ABR1	GO:0005634(nucleus);GO:0003677(DNA binding);GO:0003700(sequence-specific DNA binding transcription factor activity);GO:0009738(abscisic acid mediated signaling pathway);GO:0050832(defense response to fungus);GO:0009873(ethylene mediated signaling pathway);GO:0009788(negative regulation of abscisic acid mediated signaling pathway);GO:0009749(response to glucose stimulus);GO:0006970(response to osm…	-	3	1485-1508	1499	-	4	0	40
PC-5p-104	CGGAATATAAGAACCTGTTTCTT	BnaAnng00290D	Expansin-A9	EXPA9	GO:0005618(cell wall);GO:0009507(chloroplast);GO:0005576(extracellular region);GO:0016020(membrane);GO:0009664(plant-type cell wall organization)	-	3	795-817	808	2	-	161	0
PC-5p-107	CGACCTCACCCTTTAACAGCC	BnaA03g29710D	Glyoxysomal fatty acid beta-oxidation multifunctional protein MFP-a	MFPA	GO:0009514(glyoxysome);GO:0018812(3-hydroxyacyl-CoA dehydratase activity);GO:0003857(3-hydroxyacyl-CoA dehydrogenase activity);GO:0008692(3-hydroxybutyryl-CoA epimerase activity);GO:0050662(coenzyme binding);GO:0004165(dodecenoyl-CoA delta-isomerase activity);GO:0004300(enoyl-CoA hydratase activity);GO:0006635(fatty acid beta-oxidation)	ko00592(alpha-Linolenic acid metabolism)	2	1354-1374	1365	4	-	32	0
		BnaA04g20460D	Thioredoxin O1, mitochondrial	TRXO1	GO:0005759(mitochondrial matrix);GO:0009055(electron carrier activity);GO:0016671(oxidoreductase activity, acting on a sulfur group of donors, disulfide as acceptor);GO:0015035(protein disulfide oxidoreductase activity);GO:0045454(cell redox homeostasis);GO:0022900(electron transport chain);GO:0006662(glycerol ether metabolic process);GO:0006810(transport)	-	4	1025-1046	1037	-	2	0	27
PC-5p-110	GTTTTGAGAGATTGGGAAGCT	BnaA01g22260D	Formin-like protein 3	FH3	GO:0003779(actin binding);GO:0004721(phosphoprotein phosphatase activity);GO:0030036(actin cytoskeleton organization)	-	4	242-261	252	4	-	16	0
		BnaA08g25520D	Serine/threonine-protein kinase SRK2A	SRK2A	GO:0005829(cytosol);GO:0005634(nucleus);GO:0005524(ATP binding);GO:0005515(protein binding);GO:0004674(protein serine/threonine kinase activity);GO:0009737(response to abscisic acid stimulus);GO:0009651(response to salt stress)	-	3.5	44-64	55	4	-	32	0
		BnaC01g43120D	RNA-binding protein 25	RBM25	-	-	4	245-264	255	4	-	16	0
PC-5p-116	ACCGGAATATAAGAACTCGTCTCT	BnaC03g49530D	Ethylene-responsive transcription factor ABR1	ABR1	GO:0005634(nucleus);GO:0003677(DNA binding);GO:0003700(sequence-specific DNA binding transcription factor activity);GO:0009738(abscisic acid mediated signaling pathway);GO:0050832(defense response to fungus);GO:0009873(ethylene mediated signaling pathway);GO:0009788(negative regulation of abscisic acid mediated signaling pathway);GO:0009749(response to glucose stimulus);GO:0006970(response to osm…	-	3.5	1485-1508	1499	-	4	0	40
PC-5p-118	AGCGGAATATAAGAACTTGTTTCT	BnaC03g49530D	Ethylene-responsive transcription factor ABR1	ABR1	GO:0005634(nucleus);GO:0003677(DNA binding);GO:0003700(sequence-specific DNA binding transcription factor activity);GO:0009738(abscisic acid mediated signaling pathway);GO:0050832(defense response to fungus);GO:0009873(ethylene mediated signaling pathway);GO:0009788(negative regulation of abscisic acid mediated signaling pathway);GO:0009749(response to glucose stimulus);GO:0006970(response to osm…	-	3.5	1485-1508	1499	-	4	0	40
PC-5p-122	GATTAACCCGGGGTTCTTAGGATG	BnaC04g51140D	Beta-glucosidase 11	BGL11	GO:0008422(beta-glucosidase activity);GO:0043169(cation binding);GO:0005975(carbohydrate metabolic process)	ko00460(Cyanoamino acid metabolism);ko00500(Starch and sucrose metabolism);ko00940(Phenylpropanoid biosynthesis)	2.5	5642-5665	5656	4	-	32	0
		BnaC09g50760D	Probable disease resistance protein At5g04720	DRL30	GO:0005524(ATP binding);GO:0017111(nucleoside-triphosphatase activity);GO:0006915(apoptosis);GO:0006952(defense response)	-	0.5	1030-1053	1044	-	2	0	81
PC-5p-123	AGCGGAATATAAGAACTTGTTTC	BnaC03g49530D	Ethylene-responsive transcription factor ABR1	ABR1	GO:0005634(nucleus);GO:0003677(DNA binding);GO:0003700(sequence-specific DNA binding transcription factor activity);GO:0009738(abscisic acid mediated signaling pathway);GO:0050832(defense response to fungus);GO:0009873(ethylene mediated signaling pathway);GO:0009788(negative regulation of abscisic acid mediated signaling pathway);GO:0009749(response to glucose stimulus);GO:0006970(response to osm…	-	3.5	1486-1508	1499	-	4	0	40
PC-5p-127	AGCGGAAAATAAGAACTCGTGTCT	BnaC05g41840D	Eukaryotic translation initiation factor 3 subunit G	EIF3G	GO:0005852(eukaryotic translation initiation factor 3 complex);GO:0000166(nucleotide binding);GO:0003743(translation initiation factor activity)	-	4	1579-1601	1592	4	-	16	0
PC-5p-128	TGAAAAGTCTTCCAAATGGAC	BnaC01g09760D	-	-	-	-	2	1422-1442	1433	-	4	0	20
		BnaC06g12040D	Copia protein	COPIA	-	-	2	7541-7561	7552	-	4	0	20
		BnaC07g30740D	Probable carboxylesterase 18	CXE18	GO:0004091(carboxylesterase activity);GO:0080030(methyl indole-3-acetate esterase activity);GO:0080032(methyl jasmonate esterase activity);GO:0080031(methyl salicylate esterase activity);GO:0009860(pollen tube growth)	ko00623(2,4-Dichlorobenzoate degradation);ko00960(Tropane, piperidine and pyridine alkaloid biosynthesis)	2	2548-2568	2559	4	-	8	0
PC-5p-132	GGGTCCTTAATCGTAGGGTC	BnaAnng10200D	-	-	-	-	4	826-846	837	2	2	65	81
		BnaCnng58260D	-	-	-	-	4	843-863	854	2	2	65	81
PC-5p-135	GTTCCGACGGAAAATGAATTCTT	BnaC01g41010D	Bifunctional aspartokinase/homoserine dehydrogenase 2, chloroplastic	AKH2	GO:0009507(chloroplast);GO:0016597(amino acid binding);GO:0004072(aspartate kinase activity);GO:0005524(ATP binding);GO:0004412(homoserine dehydrogenase activity);GO:0050661(NADP binding);GO:0009086(methionine biosynthetic process)	ko00260(Glycine, serine and threonine metabolism);ko00270(Cysteine and methionine metabolism);ko00300(Lysine biosynthesis)	2	4149-4171	4162	2	4	16	10
		BnaC03g24840D	Putative F-box protein At1g46984	FB36	-	-	2	4817-4839	4830	2	4	16	10
		BnaC03g39500D	BAHD acyltransferase At3g29680	BAHD2	-	ko00230(Purine metabolism)	2	5887-5909	5900	-	0	0	81
		BnaC07g17880D	-	-	-	-	2	329-351	342	2	4	16	10
		BnaC09g30070D	-	-	-	-	2	1155-1177	1168	2	4	16	10
PC-5p-136	AGCGGAATATAAGAATTCGTCTCT	BnaC03g49530D	Ethylene-responsive transcription factor ABR1	ABR1	GO:0005634(nucleus);GO:0003677(DNA binding);GO:0003700(sequence-specific DNA binding transcription factor activity);GO:0009738(abscisic acid mediated signaling pathway);GO:0050832(defense response to fungus);GO:0009873(ethylene mediated signaling pathway);GO:0009788(negative regulation of abscisic acid mediated signaling pathway);GO:0009749(response to glucose stimulus);GO:0006970(response to osm…	-	2.5	1485-1508	1499	-	4	0	40
PC-5p-138	AGCGGAATATAAGAACTCGACTCT	BnaC03g49530D	Ethylene-responsive transcription factor ABR1	ABR1	GO:0005634(nucleus);GO:0003677(DNA binding);GO:0003700(sequence-specific DNA binding transcription factor activity);GO:0009738(abscisic acid mediated signaling pathway);GO:0050832(defense response to fungus);GO:0009873(ethylene mediated signaling pathway);GO:0009788(negative regulation of abscisic acid mediated signaling pathway);GO:0009749(response to glucose stimulus);GO:0006970(response to osm…	-	3.5	1485-1508	1499	-	4	0	40
PC-5p-141	GATACGGTCTCTTAGCTTTTAACT	BnaA06g36450D	Alcohol dehydrogenase class-3	ADHX	GO:0005829(cytosol);GO:0005777(peroxisome);GO:0004022(alcohol dehydrogenase (NAD) activity);GO:0051903(S-(hydroxymethyl)glutathione dehydrogenase activity);GO:0080007(S-nitrosoglutathione reductase activity);GO:0008270(zinc ion binding);GO:0008219(cell death);GO:0006069(ethanol oxidation);GO:0046292(formaldehyde metabolic process);GO:0010286(heat acclimation);GO:0048316(seed development)	ko00010(Glycolysis / Gluconeogenesis);ko00071(Fatty acid metabolism);ko00350(Tyrosine metabolism);ko00624(1- and 2-Methylnaphthalene degradation);ko00641(3-Chloroacrylic acid degradation);ko00680(Methane metabolism);ko00830(Retinol metabolism);ko00980(Metabolism of xenobiotics by cytochrome P450);ko00982(Drug metabolism - cytochrome P450)	4	664-687	678	2	-	97	0
PC-5p-144	AGCGGAATATAAGAACCTGCCTCT	BnaC03g49530D	Ethylene-responsive transcription factor ABR1	ABR1	GO:0005634(nucleus);GO:0003677(DNA binding);GO:0003700(sequence-specific DNA binding transcription factor activity);GO:0009738(abscisic acid mediated signaling pathway);GO:0050832(defense response to fungus);GO:0009873(ethylene mediated signaling pathway);GO:0009788(negative regulation of abscisic acid mediated signaling pathway);GO:0009749(response to glucose stimulus);GO:0006970(response to osm…	-	3.5	1485-1508	1499	-	4	0	40
PC-5p-146	AACGGAATATAAGAACTCGTCTC	BnaC03g49530D	Ethylene-responsive transcription factor ABR1	ABR1	GO:0005634(nucleus);GO:0003677(DNA binding);GO:0003700(sequence-specific DNA binding transcription factor activity);GO:0009738(abscisic acid mediated signaling pathway);GO:0050832(defense response to fungus);GO:0009873(ethylene mediated signaling pathway);GO:0009788(negative regulation of abscisic acid mediated signaling pathway);GO:0009749(response to glucose stimulus);GO:0006970(response to osm…	-	1.5	1486-1508	1499	-	4	0	40
PC-5p-154	AACGGAATATAAGAATCTGTATCT	BnaC03g49530D	Ethylene-responsive transcription factor ABR1	ABR1	GO:0005634(nucleus);GO:0003677(DNA binding);GO:0003700(sequence-specific DNA binding transcription factor activity);GO:0009738(abscisic acid mediated signaling pathway);GO:0050832(defense response to fungus);GO:0009873(ethylene mediated signaling pathway);GO:0009788(negative regulation of abscisic acid mediated signaling pathway);GO:0009749(response to glucose stimulus);GO:0006970(response to osm…	-	2.5	1485-1508	1499	-	4	0	40
PC-5p-156	AATCATGGTTAAGGAACT	BnaA01g14940D	Beta-carotene 3-hydroxylase 1, chloroplastic	BCH1	GO:0031969(chloroplast membrane);GO:0016021(integral to membrane);GO:0010291(carotene beta-ring hydroxylase activity);GO:0016787(hydrolase activity);GO:0005506(iron ion binding);GO:0016119(carotene metabolic process);GO:0016117(carotenoid biosynthetic process);GO:0006633(fatty acid biosynthetic process)	ko00906(Carotenoid biosynthesis)	4	203-219	211	4	-	32	0
		BnaA02g21420D	Primary amine oxidase	AMO	GO:0052595(aliphatic-amine oxidase activity);GO:0052594(aminoacetone:oxygen oxidoreductase(deaminating) activity);GO:0005507(copper ion binding);GO:0052596(phenethylamine:oxygen oxidoreductase (deaminating) activity);GO:0008131(primary amine oxidase activity);GO:0048038(quinone binding);GO:0052593(tryptamine:oxygen oxidoreductase (deaminating) activity);GO:0009308(amine metabolic process)	ko00260(Glycine, serine and threonine metabolism);ko00350(Tyrosine metabolism);ko00360(Phenylalanine metabolism);ko00410(beta-Alanine metabolism);ko00950(Isoquinoline alkaloid biosynthesis);ko00960(Tropane, piperidine and pyridine alkaloid biosynthesis)	3.5	2109-2127	2118	2	3	185	20
		BnaA04g02470D	Eukaryotic translation initiation factor 3 subunit E	EIF3E	GO:0005737(cytoplasm);GO:0003743(translation initiation factor activity)	-	4	1476-1493	1484	4	-	11	0
		BnaA05g24450D	Uncharacterized exonuclease domain-containing protein At3g15140	Y3514	GO:0004527(exonuclease activity);GO:0046872(metal ion binding);GO:0003676(nucleic acid binding)	-	4	431-447	438	-	4	0	20
		BnaA06g26040D	Superoxide dismutase [Fe] 3, chloroplastic	SODF3	-	ko04146(Peroxisome);ko05016(Huntington's disease)	4	673-690	681	4	2	11	61
		BnaA07g14320D	Outer envelope pore protein 16-1, chloroplastic	OP161	-	-	4	1048-1065	1056	2	2	129	323
		BnaA09g36630D	Eukaryotic translation initiation factor 3 subunit E	EIF3E	GO:0005737(cytoplasm);GO:0003743(translation initiation factor activity)	-	4	1050-1067	1058	4	-	11	0
		BnaC02g28390D	Primary amine oxidase	AMO	GO:0052595(aliphatic-amine oxidase activity);GO:0052594(aminoacetone:oxygen oxidoreductase(deaminating) activity);GO:0005507(copper ion binding);GO:0052596(phenethylamine:oxygen oxidoreductase (deaminating) activity);GO:0008131(primary amine oxidase activity);GO:0048038(quinone binding);GO:0052593(tryptamine:oxygen oxidoreductase (deaminating) activity);GO:0009308(amine metabolic process)	ko00260(Glycine, serine and threonine metabolism);ko00350(Tyrosine metabolism);ko00360(Phenylalanine metabolism);ko00410(beta-Alanine metabolism);ko00950(Isoquinoline alkaloid biosynthesis);ko00960(Tropane, piperidine and pyridine alkaloid biosynthesis)	3.5	2108-2126	2117	2	3	185	20
		BnaC02g42190D	Superoxide dismutase [Fe] 3, chloroplastic	SODF3	-	ko04146(Peroxisome);ko05016(Huntington's disease)	4	836-853	844	2	2	27	61
		BnaC04g15130D	Outer envelope pore protein 16-1, chloroplastic	OP161	-	-	4	982-999	990	-	3	0	81
		BnaC08g28210D	Eukaryotic translation initiation factor 3 subunit E	EIF3E	GO:0005737(cytoplasm);GO:0003743(translation initiation factor activity)	-	4	1075-1092	1083	4	-	11	0
[1]Name	Name regulation following Additional file 5: Table S5
[2]Symbol	The symbol of gene annotation
[3]GO	GO (Gene ontology) annotation; http://www.geneontology.org
[4]KEGG	KEGG (kyoto encyclopedia of genes and genomes) pathways annotation; http;//www.genome.jp/kegg
[5]Score	Alignment score
[6]Range	Alignment range
[7]Site	Degradome cleavage site
[8]Category	Degradome cleavage cateory
[9]TPB	Targets per billion = targets count*1.00E+09/total count
