# Supplementary material for: Identification of miRNAs and their targets in transgenic Brassica napus and its acceptor (Westar) by high-throughput sequencing and degradome analysis
Source: Royal Society of Chemistry journal article supplement (doi:10.1039/c5ra14672k), 2015-01-01
Supplement: c5ra14672k10.xlsx [file c5ra14672k10.xlsx]

## Sheet: Sheet1
Additional file 9: Table S9 - Categorization and comparison of high confidence miRNA targets in the WA and TG degradome libraries
Gene annotation	Symbol[1]	Transcript ID	Name[2]	Sequence	Range[3]	Site[4]	WA Category[5]	TG Category[5]	WA TPB[6]	TG TPB[6]	Log2 Ratio[7]
12-oxophytodienoate reductase 1	OPR1	BnaA02g17670D	bna-miR156b,c,g	TTGACAGAAGATAGAGAGCAC	716-735	726	2	-	32	0	-
		BnaC02g24210D	bna-miR156b,c,g	TTGACAGAAGATAGAGAGCAC	573-592	583	2	-	32	0	-
60S ribosomal protein L12-2	RL122	BnaCnng31050D	bna-MIR169c-p3,d-p3,e-p5,i-p3	GGCAGTCTCCTTGGCTATC	197-215	206	3	3	43	57	-0.41
60S ribosomal protein L7a-1	RL7A1	BnaA04g00320D	bna-MIR169c-p3,d-p3,e-p5,i-p3	GGCAGTCTCCTTGGCTATC	1324-1342	1333	-	2	0	40	-
		BnaC04g21140D	bna-MIR169c-p3,d-p3,e-p5,i-p3	GGCAGTCTCCTTGGCTATC	1323-1341	1332	-	2	0	40	-
ABC transporter G family member 24	AB24G	BnaA06g00960D	bna-MIR6028-p3	TGAATGTCTTTCTCTTCATC	4677-4696	4687	2	-	48	0	-
Acetyl-coenzyme A carboxylase carboxyl transferase subunit alpha, chloroplastic	ACCA	BnaC04g07230D	bna-miR396a_1ss21TG	TTCCACAGCTTTCTTGAACTG	3087-3107	3098	2	2	81	202	-1.32**
Agamous-like MADS-box protein AGL16	AGL16	BnaA01g02900D	bna-miR824	TAGACCATTTGTGAGAAGGGA	2888-2908	2899	0	0	323	424	-0.39
		BnaA03g51000D	bna-miR824	TAGACCATTTGTGAGAAGGGA	3134-3154	3145	2	2	97	141	-0.54
		BnaC01g04170D	bna-miR824	TAGACCATTTGTGAGAAGGGA	2870-2890	2881	0	0	290	464	-0.68
		BnaC07g44870D	bna-miR824	TAGACCATTTGTGAGAAGGGA	3132-3152	3143	2	2	97	141	-0.54
Alcohol dehydrogenase class-3	ADHX	BnaA06g36450D	PC-5p-141	GATACGGTCTCTTAGCTTTTAACT	664-687	678	2	-	97	0	-
AP2-like ethylene-responsive transcription factor TOE2	TOE2	BnaA02g06490D	bna-miR172a	AGAATCTTGATGATGCTGCAT	1965-1985	1976	0	0	3322	4603	-0.47
			bna-miR172b,c	GGAATCTTGATGATGCTGCAT
			bna-miR172a_R-1,d_R-1	AGAATCTTGATGATGCTGCA	1966-1985
		BnaA10g12950D	bna-miR172a	AGAATCTTGATGATGCTGCAT	2922-2942	2933	0	0	3080	2039	0.6
			bna-miR172b,c	GGAATCTTGATGATGCTGCAT
			bna-miR172a_R-1,d_R-1	AGAATCTTGATGATGCTGCA	2923-2942
		BnaC09g35430D	bna-miR172a	AGAATCTTGATGATGCTGCAT	2660-2680	2671	0	0	2919	2039	0.52
			bna-miR172b,c	GGAATCTTGATGATGCTGCAT
			bna-miR172a_R-1,d_R-1	AGAATCTTGATGATGCTGCA	2661-2680
AP2-like ethylene-responsive transcription factor TOE3	TOE3	BnaA07g12050D	bna-miR172a	AGAATCTTGATGATGCTGCAT	2215-2236	2227	0	0	210	525	-1.32**
			bna-miR172b,c	GGAATCTTGATGATGCTGCAT
			bna-miR172a_R-1,d_R-1	AGAATCTTGATGATGCTGCA	2217-2236
		BnaC07g16190D	bna-miR172a	AGAATCTTGATGATGCTGCAT	2174-2194	2185	0	0	210	525	-1.32**
			bna-miR172b,c	GGAATCTTGATGATGCTGCAT
			bna-miR172a_R-1,d_R-1	AGAATCTTGATGATGCTGCA	2175-2194
ATP sulfurylase 1, chloroplastic	APS1	BnaA03g36860D	bna-miR395a,b,c	CTGAAGTGTTTGGGGGAACTC	430-450	441	2	0	108	343	-1.67**
		BnaCnng62800D	bna-miR395a,b,c	CTGAAGTGTTTGGGGGAACTC	408-428	419	2	0	108	343	-1.67**
ATP-sulfurylase 3, chloroplastic	APS3	BnaA05g16830D	bna-miR395a,b,c	CTGAAGTGTTTGGGGGAACTC	397-417	408	2	0	108	323	-1.59**
ATP sulfurylase 4, chloroplastic	APS4	BnaA06g36560D	bna-miR395a,b,c	CTGAAGTGTTTGGGGGAACTC	334-354	345	0	0	129	40	1.69**
Auxin response factor 8	ARFH	BnaA04g07950D	bna-miR167a_R-1,b_R-1,c	TGAAGCTGCCAGCATGATCTA	3406-3427	3417	0	0	290	485	-0.74
		BnaA07g25390D	bna-miR167a_R-1,b_R-1,c	TGAAGCTGCCAGCATGATCTA	4008-4029	4019	0	0	774	1171	-0.6
		BnaC06g27170D	bna-miR167a_R-1,b_R-1,c	TGAAGCTGCCAGCATGATCTA	4085-4106	4096	0	0	774	1171	-0.6
		BnaCnng25410D	bna-miR167a_R-1,b_R-1,c	TGAAGCTGCCAGCATGATCTA	3451-3472	3462	0	0	290	485	-0.74
Auxin response factor 10	ARFJ	BnaA07g13830D	bna-miR160a,b,c,d	TGCCTGGCTCCCTGTATGCCA	1687-1707	1698	0	0	532	323	0.72
		BnaC04g15900D	bna-miR160a,b,c,d	TGCCTGGCTCCCTGTATGCCA	1688-1708	1699	0	0	532	323	0.72
Auxin response factor 16	ARFP	BnaA01g06910D	bna-miR160a,b,c,d	TGCCTGGCTCCCTGTATGCCA	2330-2350	2341	0	0	2089	1908	0.13
		BnaA03g49980D	bna-miR160a,b,c,d	TGCCTGGCTCCCTGTATGCCA	5306-5326	5317	0	0	2089	1908	0.13
		BnaC01g08330D	bna-miR160a,b,c,d	TGCCTGGCTCCCTGTATGCCA	2313-2333	2324	0	0	2089	1908	0.13
		BnaC07g42330D	bna-miR160a,b,c,d	TGCCTGGCTCCCTGTATGCCA	6290-6310	6301	2	2	2089	1908	0.13
Auxin response factor 17	ARFQ	BnaA07g20790D	bna-miR160a,b,c,d	TGCCTGGCTCCCTGTATGCCA	1318-1338	1329	0	0	887	1494	-0.75
		BnaA07g33740D	bna-miR160a,b,c,d	TGCCTGGCTCCCTGTATGCCA	291-311	302	0	0	2822	7389	-1.39**
		BnaC06g20640D	bna-miR160a,b,c,d	TGCCTGGCTCCCTGTATGCCA	1334-1354	1345	0	0	887	1494	-0.75
		BnaC06g38360D	bna-miR160a,b,c,d	TGCCTGGCTCCCTGTATGCCA	1843-1863	1854	0	0	2822	7389	-1.39**
BAG family molecular chaperone regulator 1	BAG1	BnaA02g11050D	bna-miR160a,b,c,d	TGCCTGGCTCCCTGTATGCCA	423-442	433	2	2	48	131	-1.45**
		BnaA03g12820D	bna-miR160a,b,c,d	TGCCTGGCTCCCTGTATGCCA	432-451	442	1	0	97	293	-1.59**
		BnaC02g45010D	bna-miR160a,b,c,d	TGCCTGGCTCCCTGTATGCCA	426-445	436	2	2	48	131	-1.45**
		BnaCnng57590D	bna-miR160a,b,c,d	TGCCTGGCTCCCTGTATGCCA	466-485	476	2	0	65	252	-1.95**
BAHD acyltransferase At3g29680	BAHD2	BnaC03g39500D	PC-5p-100	GTTCCGACGGAAAATGAATTCCTC	5886-5909	5900	-	0	0	81	-
			PC-5p-135	GTTCCGACGGAAAATGAATTCTT	5887-5909
BEL1-like homeodomain protein 1	BLH1	BnaC04g09330D	PC-3p-72	AGAGTCGGGTTCTTATATTCTGCT	1592-1615	1606	3	-	30	0	-
			PC-3p-74	AGAGACGGATTCTTATATTCTGCT
Beta-glucosidase 15	BGL15	BnaA06g18980D	ath-miR319c, aly-miR319d-3p	TTGGACTGAAGGGAGCTCCTT	2011-2031	2022	2	2	97	81	0.26
Beta-glucosidase 44	BGL44	BnaA01g27000D	bna-miR396a_1ss21TG	TTCCACAGCTTTCTTGAACTG	2420-2440	2431	2	0	435	808	-0.89
		BnaC01g34490D	bna-miR396a_1ss21TG	TTCCACAGCTTTCTTGAACTG	2331-2351	2342	2	0	435	808	-0.89
Bifunctional aspartokinase/homoserine dehydrogenase 2, chloroplastic	AKH2	BnaC01g41010D	PC-5p-100	GTTCCGACGGAAAATGAATTCCTC	4148-4171	4162	2	4	16	10	0.68
			PC-5p-135	GTTCCGACGGAAAATGAATTCTT	4149-4171
BON1-associated protein 2	BAP2	BnaC04g04480D	bna-MIR6028-p3	TGAATGTCTTTCTCTTCATC	78-97	88	0	0	258	323	-0.32
Calcium-transporting ATPase 8, plasma membrane-type	ACA8	BnaA02g08330D	bra-miR391-5p	TTCGCAGGAGAGATAGCGCCA	577-597	588	1	0	226	1171	-2.37**
Calcium-transporting ATPase 10, plasma membrane-type	ACA10	BnaA01g07100D	bra-miR391-5p	TTCGCAGGAGAGATAGCGCCA	627-647	638	0	0	258	323	-0.32
		BnaC01g08580D	bra-miR391-5p	TTCGCAGGAGAGATAGCGCCA	561-581	572	0	0	258	323	-0.32
		BnaC07g42210D	bra-miR391-5p	TTCGCAGGAGAGATAGCGCCA	620-640	631	0	0	2258	4401	-0.96
Calmodulin-binding transcription activator 4	CMTA4	BnaA07g26320D	bna-MIR6028-p3	TGAATGTCTTTCTCTTCATC	8610-8629	8620	2	-	32	0	-
Calreticulin-1	CALR1	BnaA09g15400D	PC-3p-17	GAGATATGAAGTTGGGTTT	81-100	91	2	-	54	0	-
		BnaC09g16150D	PC-3p-17	GAGATATGAAGTTGGGTTT	100-118	109	3	-	32	0	-
Calreticulin-2	CALR2	BnaC01g43040D	PC-3p-17	GAGATATGAAGTTGGGTTT	42-61	52	2	-	22	0	-
CAX-interacting protein 4	CXIP4	BnaA07g14310D	PC-3p-2	AGACTCAGACTCAGCCGCAGCCGC	824-848	839	2	2	177	141	0.33
CDT1-like protein a, chloroplastic	CDT1A	BnaC04g42140D	bna-miR396a_1ss21TG	TTCCACAGCTTTCTTGAACTG	1354-1374	1365	0	0	323	162	1.00**
Clustered mitochondria protein	CLU	BnaA06g09970D	bna-MIR168b-p5	CTCGGATTCGCTTGGTGCAGG	6828-6848	6839	-	2	0	61	-
Cysteine-rich receptor-like protein kinase 10	CRK10	BnaC03g65170D	bna-miR172a	AGAATCTTGATGATGCTGCAT	1816-1836	1827	2	2	161	162	-0.01
			bna-miR172b,c	GGAATCTTGATGATGCTGCAT
			bna-miR172a_R-1,d_R-1	AGAATCTTGATGATGCTGCA	1817-1836
Cytochrome c oxidase subunit 5b-1, mitochondrial	CX5B1	BnaC03g39200D	bol-miR398a-3p_R-1	TGTGTTCTCAGGTCACCCCT	898-917	908	2	2	129	121	0.09
Disease resistance protein RFL1	RFL1	BnaA06g08260D	bna-miR6030	TCCACCCATACCATACAGACCC	537-558	549	1	1	97	81	0.26
		BnaA09g46490D	bna-miR6030	TCCACCCATACCATACAGACCC	534-555	546	0	0	264	472	-0.84
		BnaA09g47230D	bna-miR6030	TCCACCCATACCATACAGACCC	537-558	549	0	0	281	459	-0.71
		BnaC05g09570D	bna-miR6030	TCCACCCATACCATACAGACCC	537-558	549	0	1	97	81	0.26
		BnaC08g40550D	bna-miR6030	TCCACCCATACCATACAGACCC	459-480	471	0	0	264	472	-0.84
		BnaC08g40560D	bna-miR6030	TCCACCCATACCATACAGACCC	537-558	549	0	0	264	472	-0.84
		BnaC08g41330D	bna-miR6030	TCCACCCATACCATACAGACCC	537-558	549	0	0	119	217	-0.87
		BnaC08g48650D	bna-miR6030	TCCACCCATACCATACAGACCC	537-558	549	0	0	210	202	0.06
Disease resistance protein RPS5	RPS5	BnaA08g24820D	bna-miR6030	TCCACCCATACCATACAGACCC	528-549	540	0	0	387	1198	-1.63**
		BnaAnng03870D	bna-miR6030	TCCACCCATACCATACAGACCC	537-558	549	0	0	210	202	0.06
		BnaC08g21550D	bna-miR6030	TCCACCCATACCATACAGACCC	537-558	549	0	0	210	202	0.06
		BnaCnng64090D	bna-miR6030	TCCACCCATACCATACAGACCC	537-558	549	0	0	210	202	0.06
E3 ubiquitin-protein ligase RMA3	RMA3	BnaA03g48610D	bra-MIR5725-p3	TGGCACAATCTGATCTGCATC	1556-1575	1566	2	-	65	0	-
Elongation factor Tu, chloroplastic	EFTU	BnaAnng10160D	bna-MIR6028-p3	TGAATGTCTTTCTCTTCATC	1168-1188	1179	2	2	1048	1030	0.02
Ethylene-responsive transcription factor RAP2-7	RAP27	BnaA03g22100D	bna-miR172a	AGAATCTTGATGATGCTGCAT	2273-2293	2284	0	0	1258	626	1.01**
			bna-miR172b,c	GGAATCTTGATGATGCTGCAT
			bna-miR172a_R-1,d_R-1	AGAATCTTGATGATGCTGCA	2274-2293
		BnaA07g13990D	bna-miR172a	AGAATCTTGATGATGCTGCAT	2455-2475	2466	4	2	8	20	-1.32
			bna-miR172b,c	GGAATCTTGATGATGCTGCAT
			bna-miR172a_R-1,d_R-1	AGAATCTTGATGATGCTGCA	2456-2475
		BnaC03g26480D	bna-miR172a	AGAATCTTGATGATGCTGCAT	2317-2337	2328	0	0	1298	646	1.01**
			bna-miR172b,c	GGAATCTTGATGATGCTGCAT
			bna-miR172a_R-1,d_R-1	AGAATCTTGATGATGCTGCA	2318-2337
		BnaC04g15640D	bna-miR172a	AGAATCTTGATGATGCTGCAT	2403-2423	2414	4	2	8	20	-1.32
			bna-miR172b,c	GGAATCTTGATGATGCTGCAT
			bna-miR172a_R-1,d_R-1	AGAATCTTGATGATGCTGCA	2404-2423
		BnaC09g13430D	bna-miR172a	AGAATCTTGATGATGCTGCAT	1028-1048	1039	4	1	8	20	-1.32
			bna-miR172b,c	GGAATCTTGATGATGCTGCAT
			bna-miR172a_R-1,d_R-1	AGAATCTTGATGATGCTGCA	1029-1048
Expansin-A9	EXPA9	BnaAnng00290D	PC-5p-104	CGGAATATAAGAACCTGTTTCTT	795-817	808	2	-	161	0	-
F-box only protein 6	FBX6	BnaA07g08860D	bna-miR394a_L+1,b_L+1	TTTGGCATTCTGTCCACCTCC	1668-1688	1679	0	0	73	121	-0.73
		BnaA09g27990D	bna-miR394a_L+1,b_L+1	TTTGGCATTCTGTCCACCTCC	1826-1846	1837	2	0	73	141	-0.95
		BnaC05g21250D	bna-miR394a_L+1,b_L+1	TTTGGCATTCTGTCCACCTCC	1681-1701	1692	2	0	73	141	-0.95
		BnaC07g11360D	bna-miR394a_L+1,b_L+1	TTTGGCATTCTGTCCACCTCC	1761-1781	1772	0	0	73	121	-0.73
F-box protein At4g00755	FB345	BnaC02g27570D	PC-3p-124	AGAGACTGTATTTTATATTAC	576-597	588	2	-	32	0	-
F-box protein SKIP31	SKI31	BnaCnng45610D	PC-3p-120	AACTTCTGCTAAGAACCTCACTCT	519-541	533	2	-	32	0	-
Ferrochelatase-2, chloroplastic	HEMH2	BnaA09g40430D	bol-MIR9410-p3_1ss12TC	TGGAAGACTTTCCAGACGACT	2732-2753	2744	2	3	81	40	1.02**
		BnaC08g32870D	bol-MIR9410-p3_1ss12TC	TGGAAGACTTTCCAGACGACT	2793-2814	2805	2	3	81	40	1.02**
FHA domain-containing protein DDL	DDL	BnaC03g41640D	bna-MIR156b-p3	GCTCTCTATACTTCTGTCACC	355-375	366	2	-	419	0	-
Filament-like plant protein 4	FPP4	BnaA08g21910D	bna-MIR166a-p5	GGAATGTTGTTTGGCTCGAAG	683-702	693	2	-	32	0	-
Floral homeotic protein APETALA 2	AP2	BnaA01g34730D	bna-miR172a	AGAATCTTGATGATGCTGCAT	1032-1052	1043	0	0	194	202	-0.06
			bna-miR172b,c	GGAATCTTGATGATGCTGCAT
			bna-miR172a_R-1,d_R-1	AGAATCTTGATGATGCTGCA	1033-1052
		BnaA03g53830D	bna-miR172a	AGAATCTTGATGATGCTGCAT	2207-2227	2218	2	0	48	40	0.26
			bna-miR172b,c	GGAATCTTGATGATGCTGCAT
			bna-miR172a_R-1,d_R-1	AGAATCTTGATGATGCTGCA	2208-2227
		BnaCnng39690D	bna-miR172a	AGAATCTTGATGATGCTGCAT	2222-2242	2233	0	1	48	40	0.26
			bna-miR172b,c	GGAATCTTGATGATGCTGCAT
			bna-miR172a_R-1,d_R-1	AGAATCTTGATGATGCTGCA	2223-2242
		BnaCnng71740D	bna-miR172a	AGAATCTTGATGATGCTGCAT	1030-1050	1041	0	0	194	202	-0.06
			bna-miR172b,c	GGAATCTTGATGATGCTGCAT
			bna-miR172a_R-1,d_R-1	AGAATCTTGATGATGCTGCA	1031-1050
Glutamate receptor 3.6	GLR36	BnaA09g32030D	bna-miR399a_1ss13TG,b_1ss13TG	TGCCAAAGGAGAGTTGCCCGG	3296-3316	3307	2	-	32	0	-
		BnaC08g22850D	bna-miR399a_1ss13TG,b_1ss13TG	TGCCAAAGGAGAGTTGCCCGG	2865-2885	2876	2	-	32	0	-
Glycine-rich RNA-binding protein GRP1A	GRP1	BnaC08g49360D	bra-miR5718	TCAGAACCAAACACAGAACAAG	908-930	921	3	-	65	0	-
Growth-regulating factor 1	GRF1	BnaA03g23060D	bna-miR396a_1ss21TG	TTCCACAGCTTTCTTGAACTG	587-608	598	0	0	1505	1938	-0.36
		BnaC03g27220D	bna-miR396a_1ss21TG	TTCCACAGCTTTCTTGAACTG	2316-2337	2327	1	1	1505	1938	-0.36
Growth-regulating factor 2	GRF2	BnaA01g00300D	bna-miR396a_1ss21TG	TTCCACAGCTTTCTTGAACTG	1040-1061	1051	0	0	145	565	-1.96**
		BnaA03g54290D	bna-miR396a_1ss21TG	TTCCACAGCTTTCTTGAACTG	1344-1365	1355	0	0	177	111	0.67
		BnaA03g54950D	bna-miR396a_1ss21TG	TTCCACAGCTTTCTTGAACTG	764-785	775	0	0	177	111	0.67
		BnaA08g30080D	bna-miR396a_1ss21TG	TTCCACAGCTTTCTTGAACTG	1770-1791	1781	0	0	177	111	0.67
		BnaC01g01310D	bna-miR396a_1ss21TG	TTCCACAGCTTTCTTGAACTG	1147-1168	1158	0	0	145	565	-1.96**
		BnaC07g46760D	bna-miR396a_1ss21TG	TTCCACAGCTTTCTTGAACTG	1282-1303	1293	0	0	177	111	0.67
Growth-regulating factor 3	GRF3	BnaA05g07850D	bna-miR396a_1ss21TG	TTCCACAGCTTTCTTGAACTG	1152-1173	1163	-	0	0	101	-
		BnaC03g20100D	bna-miR396a_1ss21TG	TTCCACAGCTTTCTTGAACTG	1309-1330	1320	4	0	16	61	-1.93**
		BnaC04g08880D	bna-miR396a_1ss21TG	TTCCACAGCTTTCTTGAACTG	1157-1178	1168	-	0	0	101	-
Growth-regulating factor 4	GRF4	BnaA09g33270D	bna-miR396a_1ss21TG	TTCCACAGCTTTCTTGAACTG	926-947	937	-	0	0	81	-
Growth-regulating factor 7	GRF7	BnaC02g44780D	bna-miR396a_1ss21TG	TTCCACAGCTTTCTTGAACTG	718-739	729	0	-	65	0	-
Growth-regulating factor 8	GRF8	BnaA03g46480D	bna-miR396a_1ss21TG	TTCCACAGCTTTCTTGAACTG	1014-1035	1025	0	0	677	162	2.06**
		BnaC01g15970D	bna-miR396a_1ss21TG	TTCCACAGCTTTCTTGAACTG	774-795	785	0	0	452	202	1.16**
		BnaC07g38750D	bna-miR396a_1ss21TG	TTCCACAGCTTTCTTGAACTG	1063-1084	1074	0	0	742	565	0.39
Growth-regulating factor 9	GRF9	BnaA04g26220D	bna-miR396a_1ss21TG	TTCCACAGCTTTCTTGAACTG	813-834	824	0	-	48	0	-
		BnaC04g50230D	bna-miR396a_1ss21TG	TTCCACAGCTTTCTTGAACTG	838-859	849	2	-	48	0	-
GRR1-like protein 1	GRH1	BnaA03g25790D	bna-miR393_R+1	TCCAAAGGGATCGCATTGATCC	2322-2343	2334	0	0	242	525	-1.12**
		BnaC03g73110D	bna-miR393_R+1	TCCAAAGGGATCGCATTGATCC	2358-2379	2370	0	0	242	525	-1.12**
Heat shock 70 kDa protein 6, chloroplastic	HSP7F	BnaC07g38890D	bra-miR162-3p	TCGATAAACCTCTGCATCCAG	528-548	539	-	3	0	74	-
		BnaC08g11440D	bra-miR162-3p	TCGATAAACCTCTGCATCCAG	147-167	158	4	3	16	34	-1.09
Heat shock 70 kDa protein 7, chloroplastic	HSP7G	BnaA03g46660D	bra-miR162-3p	TCGATAAACCTCTGCATCCAG	147-167	158	-	3	0	61	-
		BnaA08g14780D	bra-miR162-3p	TCGATAAACCTCTGCATCCAG	147-167	158	4	3	16	34	-1.09
Helicase sen1	SEN1	BnaA07g25420D	bna-miR396a_1ss21TG	TTCCACAGCTTTCTTGAACTG	3237-3257	3248	2	-	32	0	-
Inhibitor of Bruton tyrosine kinase	IBTK	BnaC02g03920D	bna-MIR6028-p3	TGAATGTCTTTCTCTTCATC	1223-1242	1233	2	2	32	81	-1.34**
Inositol-3-phosphate synthase	INO1	BnaA01g34710D	PC-5p-65	GACCCACAAGCATTGCAACTG	322-341	332	2	2	97	101	-0.06
		BnaC01g00680D	PC-5p-65	GACCCACAAGCATTGCAACTG	331-350	341	2	2	97	101	-0.06
Josephin-like protein	JOSL	BnaA10g04750D	aly-MIR172a-p5_1ss2CT	GTTGTTTGCTGCTGTGGCATC	413-432	424	-	2	0	27	-
LETM1 and EF-hand domain-containing protein 1, mitochondrial	LETM1	BnaC08g30010D	ath-miR169b-3p_R-1	GGCAAGTTGTCCTTCGGCTAC	3096-3117	3107	2	4	32	20	0.68
MATE efflux family protein 1	MATE1	BnaA05g15420D	bna-miR167a_R-1,b_R-1,c	TGAAGCTGCCAGCATGATCTA	2327-2346	2338	2	4	19	8	1.25
		BnaA05g35760D	bna-miR167a_R-1,b_R-1,c	TGAAGCTGCCAGCATGATCTA	3175-3194	3186	2	4	19	8	1.25
		BnaC05g25120D	bna-miR167a_R-1,b_R-1,c	TGAAGCTGCCAGCATGATCTA	2494-2513	2505	2	4	19	8	1.25
Metal tolerance protein A2	MTPA2	BnaC04g51630D	bna-MIR399c-p5	AGGGCAAGATCTCCTTTGGC	1641-1659	1650	4	2	16	40	-1.32**
Microfibrillar-associated protein 1	MFAP1	BnaA10g16920D	bna-MIR168a-p3	CGGATCCCGCCTTGTATCAAG	1620-1641	1632	3	3	19	34	-0.84
		BnaCnng52070D	bna-MIR168a-p3	CGGATCCCGCCTTGTATCAAG	1670-1691	1682	3	3	19	34	-0.84
Myosin-VIIa	MYO7A	BnaA03g35510D	bna-MIR6028-p3	TGAATGTCTTTCTCTTCATC	6370-6389	6380	2	3	40	30	0.42
		BnaC03g41300D	bna-MIR6028-p3	TGAATGTCTTTCTCTTCATC	6072-6091	6082	2	2	40	30	0.42
NAC domain-containing protein 100	NC100	BnaA04g09470D	bna-miR164b,c,d	TGGAGAAGCAGGGCACGTGCG	1001-1021	1012	1	4	65	20	1.70**
		BnaAnng06380D	bna-miR164a	TGGAGAAGCAGGGCACGTGCA	1024-1044	1035	0	4	48	20	1.26**
			bna-miR164b,c,d	TGGAGAAGCAGGGCACGTGCG
		BnaAnng07000D	bna-miR164a	TGGAGAAGCAGGGCACGTGCA	806-826	817	0	0	161	162	-0.01
			bna-miR164b,c,d	TGGAGAAGCAGGGCACGTGCG
		BnaC02g01470D	bna-miR164a	TGGAGAAGCAGGGCACGTGCA	906-926	917	0	4	48	20	1.26**
			bna-miR164b,c,d	TGGAGAAGCAGGGCACGTGCG
		BnaC04g31690D	bna-miR164b,c,d	TGGAGAAGCAGGGCACGTGCG	992-1012	1003	0	4	65	20	1.70**
		BnaC07g49940D	bna-miR164a	TGGAGAAGCAGGGCACGTGCA	955-975	966	0	-	65	0	-
			bna-miR164b,c,d	TGGAGAAGCAGGGCACGTGCG
NAC domain-containing protein 21/22	NAC22	BnaA05g26240D	bna-miR164a	TGGAGAAGCAGGGCACGTGCA	3120-3140	3131	0	4	113	20	2.50**
			bna-miR164b,c,d	TGGAGAAGCAGGGCACGTGCG
		BnaA08g00130D	bna-miR164a	TGGAGAAGCAGGGCACGTGCA	4077-4097	4088	0	-	548	0	-
			bna-miR164b,c,d	TGGAGAAGCAGGGCACGTGCG
		BnaC03g70990D	bna-miR164a	TGGAGAAGCAGGGCACGTGCA	4786-4806	4797	0	-	194	0	-
			bna-miR164b,c,d	TGGAGAAGCAGGGCACGTGCG
		BnaC05g40360D	bna-miR164a	TGGAGAAGCAGGGCACGTGCA	1838-1858	1849	0	4	113	20	2.50**
			bna-miR164b,c,d	TGGAGAAGCAGGGCACGTGCG
NADH--cytochrome b5 reductase 1	NB5R1	BnaC09g40180D	bra-miR168b-3p,c-3p	CCCGCCTTGCATCAACTGAAT	1323-1343	1334	2	-	32	0	-
Nuclear transcription factor Y subunit A-1	NFYA1	BnaA03g04040D	bna-miR169g_R-1,h_R-1,i_R-1,j_R-1,k_R-1	TAGCCAAGGATGACTTGCCTG	1451-1471	1462	4	2	32	81	-1.34**
			bna-miR169n	CAGCCAAGGATGACTTGCCGG
		BnaC09g44190D	bna-miR169a,b	CAGCCAAGGATGACTTGCCGA	2195-2215	2206	-	2	0	81	-
			bna-miR169g_R-1,h_R-1,i_R-1,j_R-1,k_R-1	TAGCCAAGGATGACTTGCCTG
			bna-miR169n	CAGCCAAGGATGACTTGCCGG
Nuclear transcription factor Y subunit A-2	NFYA2	BnaAnng02740D	bna-miR169m	TGAGCCAAAGATGACTTGCCG	1679-1699	1690	-	0	0	162	-
Nuclear transcription factor Y subunit A-3	NFYA3	BnaC06g33960D	bra-miR9563a-5p_L+2R+1_1ss5CT	GAACTCGTCTCTTAATTTTTAACT	541-564	555	0	-	97	0	-
Omega-3 fatty acid desaturase, endoplasmic reticulum	FAD3E	BnaC04g40760D	PC-5p-99	GTTTTTAGCGGAATATAAGAACCT	1668-1691	1682	2	-	65	0	-
Outer envelope pore protein 16-1, chloroplastic	OP161	BnaA07g14320D	PC-5p-156	AATCATGGTTAAGGAACT	1048-1065	1056	2	2	129	323	-1.32**
		BnaC04g15130D	PC-5p-156	AATCATGGTTAAGGAACT	982-999	990	-	3	0	81	-
Pentatricopeptide repeat-containing protein At1g12300, mitochondrial	PPR36	BnaA09g11120D	bra-miR158-3p	TTTCCAAATGTAGACAAAGCA	10104-10124	10115	0	0	113	182	-0.69
		BnaA09g46700D	bna-miR161	TCAATGCACTGAAAGTGACTA	563-583	574	4	0	32	121	-1.92**
			bra-miR5654a	ATAAATCCCAAGCATCATCCA	1136-1156	1147	0	2	108	71	0.61
		BnaA09g47120D	bra-miR5654a	ATAAATCCCAAGCATCATCCA	1547-1567	1558	0	0	70	185	-1.40**
		BnaC09g11440D	bra-miR158-3p	TTTCCAAATGTAGACAAAGCA	387-407	398	0	0	113	182	-0.69
Pentatricopeptide repeat-containing protein At1g12620	PPR37	BnaC09g37630D	bna-miR161	TCAATGCACTGAAAGTGACTA	984-1004	995	-	0	0	121	-
			bra-miR5654a	ATAAATCCCAAGCATCATCCA	1546-1566	1557	2	4	16	20	-0.32
Pentatricopeptide repeat-containing protein At2g01860	PP142	BnaA06g34480D	bna-MIR156c-p3	GCTCTCTATACTTCTGTCAATA	1280-1300	1291	-	2	0	40	-
Pentatricopeptide repeat-containing protein At3g22470, mitochondrial	PP247	BnaA09g46840D	bra-miR5654a	ATAAATCCCAAGCATCATCCA	1641-1661	1652	0	0	108	61	0.82
		BnaC08g40130D	bra-miR5654a	ATAAATCCCAAGCATCATCCA	1013-1033	1024	0	0	81	225	-1.47**
		BnaC08g40920D	bra-miR5654a	ATAAATCCCAAGCATCATCCA	935-955	946	2	0	70	205	-1.55**
Pentatricopeptide repeat-containing protein At4g34830, chloroplastic	PP349	BnaA01g02370D	bna-miR161	TCAATGCACTGAAAGTGACTA	3365-3385	3376	2	4	32	20	0.68
		BnaC01g03630D	bna-miR161	TCAATGCACTGAAAGTGACTA	3432-3452	3443	2	4	65	20	1.70**
Pentatricopeptide repeat-containing protein At5g41170, mitochondrial	PP412	BnaA04g10910D	bna-miR161	TCAATGCACTGAAAGTGACTA	707-727	718	4	1	11	27	-1.3
		BnaA07g16740D	bna-miR161	TCAATGCACTGAAAGTGACTA	577-597	588	4	1	11	27	-1.3
		BnaC04g33130D	bna-miR161	TCAATGCACTGAAAGTGACTA	710-730	721	4	2	11	27	-1.3
Pentatricopeptide repeat-containing protein At5g42310, mitochondrial	PP413	BnaA03g54490D	bna-MIR169c-p3,d-p3,e-p5,i-p3	GGCAGTCTCCTTGGCTATC	1668-1687	1677	2	2	161	141	0.19
		BnaC04g17970D	bna-MIR169c-p3,d-p3,e-p5,i-p3	GGCAGTCTCCTTGGCTATC	1591-1610	1600	2	2	161	141	0.19
Pentatricopeptide repeat-containing protein At5g43790	PP415	BnaC07g17320D	bna-miR395a,b,c	CTGAAGTGTTTGGGGGAACTC	2576-2596	2587	0	1	129	40	1.69**
PGR5-like protein 1B, chloroplastic	PGL1B	BnaA03g24920D	PC-5p-36	GTTTTCGTTCTTGTGTGAAGC	707-726	717	2	2	32	61	-0.93
		BnaC03g72980D	PC-5p-36	GTTTTCGTTCTTGTGTGAAGC	658-677	668	2	2	32	61	-0.93
PHD finger protein ALFIN-LIKE 7	ALFL7	BnaA08g23940D	bna-miR390a,b,c	AAGCTCAGGAGGGATAGCGCC	750-770	761	-	2	0	61	-
		BnaC08g16190D	bna-miR390a,b,c	AAGCTCAGGAGGGATAGCGCC	847-867	858	-	2	0	61	-
Primary amine oxidase	AMO	BnaA02g21420D	PC-5p-156	AATCATGGTTAAGGAACT	2109-2127	2118	2	3	185	20	3.21**
		BnaC02g28390D	PC-5p-156	AATCATGGTTAAGGAACT	2108-2126	2117	2	3	185	20	3.21**
Probable 3-hydroxyisobutyrate dehydrogenase-like 3, mitochondrial	3HID3	BnaA02g35580D	PC-3p-44	AAAAACGACGTCGTCTTATCTTGT	200-222	213	2	-	97	0	-
Probable disease resistance protein At1g12280	DRL1	BnaC06g40800D	bna-miR6030	TCCACCCATACCATACAGACCC	24-45	36	1	2	65	81	-0.32
Probable disease resistance protein At1g12290	DRL2	BnaC08g15510D	bna-miR6030	TCCACCCATACCATACAGACCC	153-174	165	0	0	382	1171	-1.62**
		BnaC08g41340D	bna-miR6030	TCCACCCATACCATACAGACCC	543-564	555	3	4	11	13	-0.24
		BnaC08g41710D	bna-miR6030	TCCACCCATACCATACAGACCC	510-531	522	0	0	382	1171	-1.62**
Probable disease resistance protein At1g61190	DRL16	BnaA09g13850D	bna-miR6030	TCCACCCATACCATACAGACCC	528-549	540	1	0	32	262	-3.03**
		BnaCnng10060D	bna-miR6030	TCCACCCATACCATACAGACCC	527-548	539	2	0	32	262	-3.03**
Probable disease resistance protein At5g04720	DRL30	BnaC09g50760D	PC-5p-122	GATTAACCCGGGGTTCTTAGGATG	1030-1053	1044	-	2	0	81	-
Probable E3 ubiquitin-protein ligase HERC2	HERC2	BnaA02g01070D	bna-MIR6028-p3	TGAATGTCTTTCTCTTCATC	2045-2064	2055	2	2	32	81	-1.34**
Probable ubiquitin-conjugating enzyme E2 24	UBC24	BnaA04g19750D	bna-miR399a_1ss13TG,b_1ss13TG	TGCCAAAGGAGAGTTGCCCGG	1050-1070	1061	2	2	903	2786	-1.63**
			ath-miR399c-3p	TGCCAAAGGAGAGTTGCCCTG	1345-1365	1356	2	2	613	929	-0.6
Probable WRKY transcription factor 19	WRK19	BnaA06g23530D	bna-miR394a_L+1,b_L+1	TTTGGCATTCTGTCCACCTCC	628-649	639	2	2	32	40	-0.32
		BnaA09g06880D	bna-miR394a_L+1,b_L+1	TTTGGCATTCTGTCCACCTCC	535-556	546	2	2	32	40	-0.32
Proline-rich receptor-like protein kinase PERK1	PERK1	BnaA04g27590D	bna-miR396a_1ss21TG	TTCCACAGCTTTCTTGAACTG	784-804	795	0	2	774	444	0.8
Protease Do-like 1, chloroplastic	DEGP1	BnaA06g31770D	bna-miR396a_1ss21TG	TTCCACAGCTTTCTTGAACTG	2620-2640	2631	2	4	81	20	2.02**
		BnaCnng33260D	bna-miR396a_1ss21TG	TTCCACAGCTTTCTTGAACTG	2249-2269	2260	2	4	81	20	2.02**
Protein argonaute 1	AGO1	BnaA05g17460D	bna-miR168a	TCGCTTGGTGCAGGTCGGGAA	1273-1293	1284	0	0	943	1131	-0.26
		BnaA08g03260D	bna-miR168a	TCGCTTGGTGCAGGTCGGGAA	912-932	923	0	0	943	1151	-0.29
		BnaC05g25730D	bna-miR168a	TCGCTTGGTGCAGGTCGGGAA	689-709	700	0	0	943	1131	-0.26
		BnaC08g46720D	bna-miR168a	TCGCTTGGTGCAGGTCGGGAA	356-376	367	0	0	943	1151	-0.29
Protein argonaute 2	AGO2	BnaA05g14760D	bna-miR403	TTAGATTCACGCACAAACTCG	3367-3387	3378	0	0	1226	1171	0.07
		BnaA09g25290D	bna-miR403	TTAGATTCACGCACAAACTCG	3538-3558	3549	0	0	452	525	-0.22
		BnaCnng68320D	bna-miR403	TTAGATTCACGCACAAACTCG	3019-3039	3030	0	0	516	969	-0.91
Protein AUXIN SIGNALING F-BOX 2	AFB2	BnaA02g28290D	bna-miR393_R+1	TCCAAAGGGATCGCATTGATCC	2519-2540	2531	0	0	1177	2059	-0.81
		BnaC02g36370D	bna-miR393_R+1	TCCAAAGGGATCGCATTGATCC	2579-2600	2591	0	0	1177	2059	-0.81
Protein AUXIN SIGNALING F-BOX 3	AFB3	BnaA08g24570D	bna-miR393_R+1	TCCAAAGGGATCGCATTGATCC	2628-2649	2640	0	0	1669	3886	-1.22**
		BnaC08g15770D	bna-miR393_R+1	TCCAAAGGGATCGCATTGATCC	2405-2426	2417	0	0	1669	3886	-1.22**
		BnaC08g29060D	bna-miR393_R+1	TCCAAAGGGATCGCATTGATCC	2424-2445	2436	0	0	1669	3886	-1.22**
		BnaC08g40890D	bna-miR393_R+1	TCCAAAGGGATCGCATTGATCC	2456-2477	2468	0	0	1669	3886	-1.22**
Protein SPA1-RELATED 2	SPA2	BnaC09g26140D	bna-miR399a_1ss13TG,b_1ss13TG	TGCCAAAGGAGAGTTGCCCGG	971-991	982	2	2	48	81	-0.75
Protein SUPPRESSOR OF npr1-1, CONSTITUTIVE 1	SNC1	BnaC09g41540D	ath-MIR169e-p3_L+1	GCAAGTTGACTTTGGCTC	458-475	466	2	4	97	40	1.28**
		BnaA01g24490D	bra-miR1885b	TACATCTTCTCCGCGGAAGCTC	227-248	239	2	2	48	61	-0.35
		BnaC02g38690D	bra-miR1885b	TACATCTTCTCCGCGGAAGCTC	57-78	69	0	0	129	121	0.09
Protein TRANSPORT INHIBITOR RESPONSE 1	TIR1	BnaA04g00230D	bna-miR393_R+1	TCCAAAGGGATCGCATTGATCC	2255-2277	2268	0	0	6497	18130	-1.48**
		BnaA07g19520D	bna-miR393_R+1	TCCAAAGGGATCGCATTGATCC	2800-2822	2813	0	0	2405	7387	-1.62**
		BnaA09g40340D	bna-miR393_R+1	TCCAAAGGGATCGCATTGATCC	2335-2357	2348	0	0	2316	7327	-1.66**
		BnaC06g43000D	bna-miR393_R+1	TCCAAAGGGATCGCATTGATCC	2070-2092	2083	0	0	2405	7387	-1.62**
		BnaC08g32660D	bna-miR393_R+1	TCCAAAGGGATCGCATTGATCC	2373-2395	2386	0	0	2316	7327	-1.66**
		BnaCnng60850D	bna-miR393_R+1	TCCAAAGGGATCGCATTGATCC	2383-2405	2396	0	0	7251	20237	-1.48**
Protein WEAK CHLOROPLAST MOVEMENT UNDER BLUE LIGHT-like 3	WEL3	BnaA06g37020D	bna-miR164a	TGGAGAAGCAGGGCACGTGCA	555-576	567	-	2	0	40	-
			bna-miR164b,c,d	TGGAGAAGCAGGGCACGTGCG
Purple acid phosphatase 10	PPA10	BnaC09g08970D	bra-miR5718	TCAGAACCAAACACAGAACAAG	143-164	155	0	0	339	404	-0.25
Putative disease resistance protein At4g10780	DRL23	BnaA07g17000D	bna-miR6030	TCCACCCATACCATACAGACCC	540-561	552	2	4	11	13	-0.24
		BnaC08g41420D	bna-miR6030	TCCACCCATACCATACAGACCC	501-522	513	3	-	11	0	-
Putative disease resistance protein At4g11170	Y4117	BnaA01g32130D	bra-miR1885b	TACATCTTCTCCGCGGAAGCTC	165-186	177	0	0	403	323	0.32
		BnaA02g03790D	bra-miR1885b	TACATCTTCTCCGCGGAAGCTC	45-66	57	1	4	97	40	1.28**
		BnaA03g29580D	bra-miR1885b	TACATCTTCTCCGCGGAAGCTC	204-225	216	4	2	16	61	-1.93**
		BnaA03g45000D	bra-miR1885b	TACATCTTCTCCGCGGAAGCTC	444-465	456	0	0	1871	1655	0.18
		BnaA03g45020D	bra-miR1885b	TACATCTTCTCCGCGGAAGCTC	258-279	270	2	0	242	602	-1.31**
			bna-MIR6028-p3	TGAATGTCTTTCTCTTCATC	312-331	322	2	2	54	40	0.43
		BnaA03g45050D	bra-miR1885b	TACATCTTCTCCGCGGAAGCTC	243-264	255	0	0	48	172	-1.84**
		BnaA05g33170D	bra-MIR5719-p5_1ss16AC	TGTTGTGATGATAATCCGACT	1222-1242	1233	4	2	11	27	-1.3
		BnaC01g39050D	bra-miR1885b	TACATCTTCTCCGCGGAAGCTC	45-66	57	0	0	113	81	0.48
		BnaC02g08420D	bra-miR1885b	TACATCTTCTCCGCGGAAGCTC	1374-1395	1386	2	2	55	63	-0.2
		BnaC02g09250D	bra-miR1885b	TACATCTTCTCCGCGGAAGCTC	51-72	63	2	0	65	162	-1.32**
		BnaC03g61680D	bra-MIR5719-p5_1ss16AC	TGTTGTGATGATAATCCGACT	2589-2609	2600	4	2	16	40	-1.32
		BnaC03g69970D	bra-miR1885b	TACATCTTCTCCGCGGAAGCTC	105-126	117	0	0	355	444	-0.32
		BnaC05g47400D	bra-MIR5719-p5_1ss16AC	TGTTGTGATGATAATCCGACT	1294-1314	1305	4	2	11	27	-1.3
		BnaC05g47420D	bra-MIR5719-p5_1ss16AC	TGTTGTGATGATAATCCGACT	1227-1247	1238	4	2	11	27	-1.3
		BnaC07g37000D	bra-miR1885b	TACATCTTCTCCGCGGAAGCTC	339-360	351	2	0	242	602	-1.31**
		BnaC07g37020D	bra-miR1885b	TACATCTTCTCCGCGGAAGCTC	267-288	279	0	0	274	764	-1.48**
		BnaCnng14160D	bra-miR1885b	TACATCTTCTCCGCGGAAGCTC	249-270	261	2	2	48	61	-0.35
		BnaCnng39060D	bra-miR1885b	TACATCTTCTCCGCGGAAGCTC	60-81	72	2	2	55	74	-0.43
Putative F-box protein At1g46984	FB36	BnaC03g24840D	PC-5p-100	GTTCCGACGGAAAATGAATTCCTC	4816-4839	4830	2	4	16	10	0.68
			PC-5p-135	GTTCCGACGGAAAATGAATTCTT	4817-4839
Putative F-box protein At3g16590	FB146	BnaA10g17000D	bra-miR168b-3p,c-3p	CCCGCCTTGCATCAACTGAAT	1385-1405	1396	2	-	32	0	-
Putative phospholipid:diacylglycerol acyltransferase 2	PDAT2	BnaCnng72190D	PC-5p-72	AAGTCAACCCGCTGGTCAAAGATT	157-180	171	-	2	0	81	-
Putative proline-rich receptor-like protein kinase PERK11	PEK11	BnaC03g45540D	PC-5p-36	GTTTTCGTTCTTGTGTGAAGC	38-58	49	-	2	0	121	-
Putative receptor-like protein kinase At1g72540	Y1725	BnaA02g16030D	bra-miR156a-3p, ath-MIR156e-p3	GCTTACTCTCTCTCTGTCACC	2388-2408	2399	2	-	48	0	-
Putative U-box domain-containing protein 46	PUB46	BnaA03g07040D	bra-miR1885b	TACATCTTCTCCGCGGAAGCTC	4746-4767	4758	2	2	65	162	-1.32**
Putative UDP-arabinose 4-epimerase 4	ARAE4	BnaAnng10090D	bra-miR1885b	TACATCTTCTCCGCGGAAGCTC	2305-2326	2317	0	0	161	323	-1.00**
Retrovirus-related Pol polyprotein from transposon TNT 1-94	POLX	BnaA10g25930D	bna-miR167a_R-1,b_R-1,c	TGAAGCTGCCAGCATGATCTA	9492-9511	9502	-	1	0	81	-
Ribosome biogenesis protein BOP1 homolog	BOP1	BnaA05g04600D	bna-miR396a_1ss21TG	TTCCACAGCTTTCTTGAACTG	2233-2253	2244	2	-	48	0	-
Ribulose bisphosphate carboxylase/oxygenase activase, chloroplastic	RCA	BnaA05g05840D	bna-miR172a	AGAATCTTGATGATGCTGCAT	411-431	422	2	2	274	505	-0.88
			bna-miR172b,c	GGAATCTTGATGATGCTGCAT
			bna-miR172a_R-1,d_R-1	AGAATCTTGATGATGCTGCA	412-431
		BnaC04g05700D	bna-miR172a	AGAATCTTGATGATGCTGCAT	441-461	452	2	2	306	505	-0.72
			bna-miR172b,c	GGAATCTTGATGATGCTGCAT
			bna-miR172a_R-1,d_R-1	AGAATCTTGATGATGCTGCA	442-461
Scarecrow-like protein 6	SCL6	BnaAnng18540D	bna-miR171f,g	TGATTGAGCCGCGCCAATATC	843-863	854	0	0	6209	17605	-1.50**
			bna-miR171f,g_1ss12TC	TGATTGAGCCGCGTCAATATC
		BnaAnng18550D	bna-miR171f,g	TGATTGAGCCGCGCCAATATC	832-852	843	0	0	6209	17605	-1.50**
			bna-miR171f,g_1ss12TC	TGATTGAGCCGCGTCAATATC
Scarecrow-like protein 15	SCL15	BnaA07g01720D	bna-miR171f,g	TGATTGAGCCGCGCCAATATC	600-620	611	2	2	97	242	-1.32**
			bna-miR171f,g_1ss12TC	TGATTGAGCCGCGTCAATATC
		BnaC07g03310D	bna-miR171f,g	TGATTGAGCCGCGCCAATATC	602-622	613	2	2	97	242	-1.32**
			bna-miR171f,g_1ss12TC	TGATTGAGCCGCGTCAATATC
Scarecrow-like protein 22	SCL22	BnaA04g01210D	bna-miR171f,g	TGATTGAGCCGCGCCAATATC	660-680	671	2	0	661	1655	-1.32**
			bna-miR171f,g_1ss12TC	TGATTGAGCCGCGTCAATATC
		BnaC04g22080D	bna-miR171f,g	TGATTGAGCCGCGCCAATATC	808-828	819	0	0	3209	6824	-1.09**
			bna-miR171f,g_1ss12TC	TGATTGAGCCGCGTCAATATC
Scarecrow-like protein 27	SCL27	BnaA03g21080D	bna-miR171f,g	TGATTGAGCCGCGCCAATATC	899-919	910	0	0	935	1050	-0.17
			bna-miR171f,g_1ss12TC	TGATTGAGCCGCGTCAATATC
		BnaA07g37990D	bna-miR171f,g	TGATTGAGCCGCGCCAATATC	774-794	785	0	1	435	707	-0.7
			bna-miR171f,g_1ss12TC	TGATTGAGCCGCGTCAATATC
		BnaC03g25140D	bna-miR171f,g	TGATTGAGCCGCGCCAATATC	949-969	960	1	0	581	969	-0.74
			bna-miR171f,g_1ss12TC	TGATTGAGCCGCGTCAATATC
		BnaCnng57010D	bna-miR171f,g	TGATTGAGCCGCGCCAATATC	799-819	810	1	1	435	707	-0.7
			bna-miR171f,g_1ss12TC	TGATTGAGCCGCGTCAATATC
Serrate RNA effector molecule	SRRT	BnaA07g13040D	bra-MIR5719-p5_1ss16AC	TGTTGTGATGATAATCCGACT	1312-1331	1323	2	-	22	0	-
		BnaC04g38630D	bra-MIR5719-p5_1ss16AC	TGTTGTGATGATAATCCGACT	1144-1163	1155	3	-	22	0	-
Solanesyl diphosphate synthase 2, chloroplastic	SPS2	BnaC04g21590D	ath-miR170-5p, bna-MIR171g-p5	TATTGGCCTGGTTCACTCAGA	1284-1304	1295	2	2	110	89	0.31
		BnaC07g15160D	ath-miR170-5p, bna-MIR171g-p5	TATTGGCCTGGTTCACTCAGA	1381-1401	1392	2	2	110	89	0.31
Squamosa promoter-binding-like protein 2	SPL2	BnaA09g16340D	bna-miR156b,c,g	TTGACAGAAGATAGAGAGCAC	2039-2059	2050	-	2	0	40	-
			bna-miR156d,e,f,a_R-1	TGACAGAAGAGAGTGAGCAC	2039-2058	2049	2	1	32	81	-1.34**
			bna-miR156e_R+1	TGACAGAAGAGAGTGAGCACT	2038-2058
		BnaC07g17030D	bna-miR156d,e,f,a_R-1	TGACAGAAGAGAGTGAGCAC	3263-3282	3273	1	-	65	0	-
			bna-miR156e_R+1	TGACAGAAGAGAGTGAGCACT	3262-3282
		BnaC09g17430D	bna-miR156b,c,g	TTGACAGAAGATAGAGAGCAC	2909-2929	2920	-	2	0	40	-
			bna-miR156d,e,f,a_R-1	TGACAGAAGAGAGTGAGCAC	2909-2928	2919	2	1	32	81	-1.34**
			bna-miR156e_R+1	TGACAGAAGAGAGTGAGCACT	2908-2928
Squamosa promoter-binding-like protein 7	SPL7	BnaAnng08550D	PC-5p-27	GAGTGGAAAATGGAGTGATGAACA	742-765	756	4	0	32	81	-1.34**
Squamosa promoter-binding-like protein 9	SPL9	BnaC04g48150D	bna-miR156b,c,g	TTGACAGAAGATAGAGAGCAC	2010-2030	2021	1	1	129	81	0.67
			bna-miR156d,e,f,a_R-1	TGACAGAAGAGAGTGAGCAC	2010-2029	2020
			bna-miR156e_R+1	TGACAGAAGAGAGTGAGCACT	2009-2029
Squamosa promoter-binding-like protein 10	SPL10	BnaA07g08830D	bna-miR156b,c,g	TTGACAGAAGATAGAGAGCAC	1621-1641	1632	2	0	30	50	-0.74
			bna-miR156d,e,f,a_R-1	TGACAGAAGAGAGTGAGCAC	1621-1640	1631	2	2	29	24	0.27
			bna-miR156e_R+1	TGACAGAAGAGAGTGAGCACT	1620-1640
		BnaA07g08840D	bna-miR156b,c,g	TTGACAGAAGATAGAGAGCAC	2287-2307	2298	4	2	32	162	-2.34**
			bna-miR156d,e,f,a_R-1	TGACAGAAGAGAGTGAGCAC	2287-2306	2297	4	2	32	81	-1.34**
			bna-miR156e_R+1	TGACAGAAGAGAGTGAGCACT	2286-2306
		BnaAnng25050D	bna-miR156b,c,g	TTGACAGAAGATAGAGAGCAC	1330-1350	1341	2	0	30	50	-0.74
			bna-miR156d,e,f,a_R-1	TGACAGAAGAGAGTGAGCAC	1330-1349	1340	2	2	29	24	0.27
			bna-miR156e_R+1	TGACAGAAGAGAGTGAGCACT	1329-1349
		BnaC05g21280D	bna-miR156d,e,f,a_R-1	TGACAGAAGAGAGTGAGCAC	1462-1481	1472	2	2	29	24	0.27
			bna-miR156e_R+1	TGACAGAAGAGAGTGAGCACT	1461-1481
		BnaC07g11380D	bna-miR156b,c,g	TTGACAGAAGATAGAGAGCAC	1557-1577	1568	2	4	65	40	0.7
			bna-miR156d,e,f,a_R-1	TGACAGAAGAGAGTGAGCAC	1557-1576	1567	2	2	65	81	-0.32
			bna-miR156e_R+1	TGACAGAAGAGAGTGAGCACT	1556-1576
		BnaC07g11390D	bna-miR156d,e,f,a_R-1	TGACAGAAGAGAGTGAGCAC	2358-2377	2368	3	2	13	24	-0.88
			bna-miR156e_R+1	TGACAGAAGAGAGTGAGCACT	2357-2377
Squamosa promoter-binding-like protein 11	SPL11	BnaC03g57620D	bna-miR156b,c,g	TTGACAGAAGATAGAGAGCAC	2293-2313	2304	2	2	30	50	-0.74
			bna-miR156d,e,f,a_R-1	TGACAGAAGAGAGTGAGCAC	2293-2312	2303	2	2	29	24	0.27
			bna-miR156e_R+1	TGACAGAAGAGAGTGAGCACT	2292-2312
Squamosa promoter-binding-like protein 13A	SP13A	BnaA03g13580D	bna-miR156d,e,f,a_R-1	TGACAGAAGAGAGTGAGCAC	1147-1166	1157	1	0	32	101	-1.66**
			bna-miR156e_R+1	TGACAGAAGAGAGTGAGCACT	1146-1166
		BnaC03g16490D	bna-miR156d,e,f,a_R-1	TGACAGAAGAGAGTGAGCAC	1158-1177	1168	1	0	32	101	-1.66**
			bna-miR156e_R+1	TGACAGAAGAGAGTGAGCACT	1157-1177
Squamosa promoter-binding-like protein 15	SPL15	BnaA07g17550D	bna-miR156d,e,f,a_R-1	TGACAGAAGAGAGTGAGCAC	864-883	874	0	-	48	0	-
			bna-miR156e_R+1	TGACAGAAGAGAGTGAGCACT	863-883
		BnaC06g16200D	bna-miR156d,e,f,a_R-1	TGACAGAAGAGAGTGAGCAC	878-897	888	2	-	48	0	-
			bna-miR156e_R+1	TGACAGAAGAGAGTGAGCACT	877-897
Sulfate transporter 2.1	SUT21	BnaA08g21110D	bna-miR395a,b,c	CTGAAGTGTTTGGGGGAACTC	41-61	52	4	1	11	40	-1.86
		BnaA10g22050D	bna-miR395a,b,c	CTGAAGTGTTTGGGGGAACTC	41-61	52	4	2	11	40	-1.86
		BnaC09g46440D	bna-miR395a,b,c	CTGAAGTGTTTGGGGGAACTC	104-124	115	4	2	11	40	-1.86
Superoxide dismutase [Fe] 3, chloroplastic	SODF3	BnaA06g26040D	PC-5p-156	AATCATGGTTAAGGAACT	673-690	681	4	2	11	61	-2.47**
		BnaC02g42190D	PC-5p-156	AATCATGGTTAAGGAACT	836-853	844	2	2	27	61	-1.18**
Thioredoxin M2, chloroplastic	TRXM2	BnaA09g01610D	PC-3p-74	AGAGACGGATTCTTATATTCTGCT	166-188	179	2	2	129	162	-0.33
Thioredoxin M-type, chloroplastic	TRXM	BnaA03g57160D	PC-3p-74	AGAGACGGATTCTTATATTCTGCT	242-264	255	2	2	161	162	-0.01
		BnaC09g00770D	PC-3p-74	AGAGACGGATTCTTATATTCTGCT	164-186	177	2	2	129	162	-0.33
		BnaCnng16050D	PC-3p-74	AGAGACGGATTCTTATATTCTGCT	272-294	285	2	2	97	323	-1.74**
Thioredoxin O1, mitochondrial	TRXO1	BnaA04g20460D	PC-5p-107	CGACCTCACCCTTTAACAGCC	1025-1046	1037	-	2	0	27	-
Tonoplast dicarboxylate transporter	TDT	BnaC02g33350D	PC-3p-72	AGAGTCGGGTTCTTATATTCTGCT	1792-1815	1806	2	-	30	0	-
			PC-3p-74	AGAGACGGATTCTTATATTCTGCT
Transcription factor bHLH76	BH076	BnaC07g07840D	bna-miR393_R+1	TCCAAAGGGATCGCATTGATCC	308-329	320	0	0	129	404	-1.65**
Transcription factor bHLH77	BH077	BnaA01g23600D	bna-miR393_R+1	TCCAAAGGGATCGCATTGATCC	371-392	383	0	0	258	1131	-2.13**
		BnaCnng29920D	bna-miR393_R+1	TCCAAAGGGATCGCATTGATCC	411-432	423	0	4	194	40	2.28**
Transcription factor GAMYB	GAM1	BnaA03g11630D	bna-miR159	TTTGGATTGAAGGGAGCTCTA	1262-1282	1273	4	0	16	242	-3.92**
		BnaA05g27620D	bna-miR159	TTTGGATTGAAGGGAGCTCTA	1624-1644	1635	0	0	1043	1090	-0.06
		BnaAnng27960D	bna-miR159	TTTGGATTGAAGGGAGCTCTA	1020-1040	1031	0	-	161	0	-
		BnaC03g71630D	bna-miR159	TTTGGATTGAAGGGAGCTCTA	2491-2511	2502	4	0	16	242	-3.91**
		BnaCnng31260D	bna-miR159	TTTGGATTGAAGGGAGCTCTA	1087-1107	1098	0	0	1107	1090	0.02
		BnaCnng49390D	bna-miR159	TTTGGATTGAAGGGAGCTCTA	1054-1074	1065	0	0	1720	1090	0.66
Transcription factor MYB104	MY104	BnaA03g22590D	bna-miR159	TTTGGATTGAAGGGAGCTCTA	1375-1395	1386	0	0	306	242	0.34
		BnaC03g26620D	bna-miR159	TTTGGATTGAAGGGAGCTCTA	1489-1509	1500	0	0	274	444	-0.7
Transcription factor TCP4	TCP4	BnaA05g24520D	bra-miR319-3p, ath-miR319a,b, aly-miR319a-3p,b-3p	TTGGACTGAAGGGAGCTCCCT	918-939	930	3	2	27	40	-0.57
			ath-miR319c, aly-miR319d-3p	TTGGACTGAAGGGAGCTCCTT	919-939
		BnaCnng59700D	bra-miR319-3p, ath-miR319a,b, aly-miR319a-3p,b-3p	TTGGACTGAAGGGAGCTCCCT	911-932	923	3	2	27	40	-0.57
			ath-miR319c, aly-miR319d-3p	TTGGACTGAAGGGAGCTCCTT	912-932
Translation initiation factor IF-3	IF3	BnaC07g42850D	bna-MIR160c-p3,d-p3	GCGTACAGAGTAGTCAAGCATG	1139-1159	1150	2	2	113	101	0.16
Tropinone reductase homolog At1g07440	TRNH1	BnaC02g02110D	PC-3p-72	AGAGTCGGGTTCTTATATTCTGCT	726-749	740	2	-	30	0	-
			PC-3p-74	AGAGACGGATTCTTATATTCTGCT
Two-component response regulator-like APRR9	APRR9	BnaA04g26750D	bna-MIR399c-p5	AGGGCAAGATCTCCTTTGGC	1589-1607	1598	4	3	16	40	-1.32
UDP-glycosyltransferase 84A1	U84A1	BnaA03g41940D	bna-MIR169h-p3,k-p3	GGCAGTCTCCTCGGCTATT	908-927	918	4	3	16	101	-2.66**
		BnaC07g33030D	bna-MIR169h-p3,k-p3	GGCAGTCTCCTCGGCTATT	908-927	918	4	3	16	101	-2.66**
Uncharacterized protein Os08g0359500	Y8359	BnaA10g01470D	bna-miR6030	TCCACCCATACCATACAGACCC	975-995	986	2	2	290	222	0.39
		BnaC05g01500D	bna-miR6030	TCCACCCATACCATACAGACCC	1200-1220	1211	2	2	290	222	0.39
Uncharacterized protein ycf36	YCF36	BnaC09g07320D	PC-5p-47	ATAAGATGGATGAGCCACTCCACT	1968-1991	1982	2	2	258	81	1.67**
UPF0392 protein At1g27200	Y1720	BnaA09g29630D	bra-miR400-3p	GACTTATAATGATCTCATGAA	1450-1469	1460	4	1	32	81	-1.34**
WEB family protein At2g40480	Y2048	BnaA03g19090D	bna-miR6029	TGGGGTTGTGATTTCAGGCTT	816-837	828	4	2	11	101	-3.20**
		BnaC03g22710D	bna-miR6029	TGGGGTTGTGATTTCAGGCTT	1124-1145	1136	4	2	11	101	-3.20**
Zinc finger CCCH domain-containing protein 4	C3H4	BnaC08g02120D	bna-miR168a	TCGCTTGGTGCAGGTCGGGAA	2545-2565	2556	2	-	32	0	-
			bra-miR168b-5p,c-5p	TCGCTTGGTGCAGGTCGGGAC
-	-	BnaA09g08870D	bna-MIR156b-p3	GCTCTCTATACTTCTGTCACC	609-628	619	2	-	22	0	-
-	-	BnaC09g09130D	bna-MIR156b-p3	GCTCTCTATACTTCTGTCACC	739-758	749	2	-	22	0	-
-	-	BnaC01g13070D	bna-miR156d,e,f,a_R-1	TGACAGAAGAGAGTGAGCAC	1317-1337	1328	-	2	0	81	-
-	-	BnaAnng00610D	bra-miR156a-3p, ath-MIR156e-p3	GCTTACTCTCTCTCTGTCACC	546-565	556	4	2	8	30	-1.91
-	-	BnaC02g03380D	bra-miR156a-3p, ath-MIR156e-p3	GCTTACTCTCTCTCTGTCACC	549-568	559	4	2	8	30	-1.91
-	-	BnaA03g50490D	bna-MIR160c-p3,d-p3	GCGTACAGAGTAGTCAAGCATG	1103-1123	1114	2	2	113	101	0.16
-	-	BnaA05g22960D	bna-MIR169c-p3,d-p3,e-p5,i-p3	GGCAGTCTCCTTGGCTATC	408-425	417	2	-	32	0	-
-	-	BnaA10g06080D	ath-MIR169e-p3_L+1	GCAAGTTGACTTTGGCTC	1923-1940	1931	-	2	0	61	-
-	-	BnaC09g26700D	ath-MIR169e-p3_L+1	GCAAGTTGACTTTGGCTC	1923-1940	1931	-	2	0	61	-
-	-	BnaAnng07150D	bna-miR172a_R-1,d_R-1	AGAATCTTGATGATGCTGCA	382-400	391	2	-	65	0	-
-	-	BnaA03g05990D	bra-miR395a-5p,d-5p, ban-MIR395b-p5	GTTCCTCTGAGCACTTCATTG	1040-1059	1050	2	-	65	0	-
-	-	BnaA07g20310D	bna-MIR395e-p5	GTTCCCTGAAACGCTTCATTG	808-828	819	2	-	32	0	-
-	-	BnaC06g19800D	bna-MIR395e-p5	GTTCCCTGAAACGCTTCATTG	802-822	813	2	-	32	0	-
-	-	BnaC09g42920D	bra-miR398-3p	TGTGTTCTCAGGTCACCCCTG	3103-3123	3114	0	-	226	0	-
-	-		bol-miR398a-3p_R-1	TGTGTTCTCAGGTCACCCCT	3104-3123
-	-	BnaA02g28690D	bol-miR398a-3p_R-1	TGTGTTCTCAGGTCACCCCT	308-327	318	0	0	48	155	-1.69**
-	-	BnaA06g32330D	bol-miR398a-3p_R-1	TGTGTTCTCAGGTCACCCCT	309-328	319	0	0	48	155	-1.69**
-	-	BnaC07g24070D	bol-miR398a-3p_R-1	TGTGTTCTCAGGTCACCCCT	416-435	426	2	0	48	155	-1.69**
-	-	BnaCnng46940D	bra-MIR5725-p3	TGGCACAATCTGATCTGCATC	1896-1916	1907	2	4	65	20	1.70**
-	-	BnaA01g20340D	bna-MIR6028-p3	TGAATGTCTTTCTCTTCATC	1588-1606	1598	0	0	564	283	0.99
-	-	BnaAnng26220D	bna-MIR6028-p3	TGAATGTCTTTCTCTTCATC	1643-1661	1653	2	-	81	0	-
-	-	BnaC01g25570D	bna-MIR6028-p3	TGAATGTCTTTCTCTTCATC	1591-1609	1601	2	2	564	283	0.99
-	-	BnaC02g22210D	bna-MIR6028-p3	TGAATGTCTTTCTCTTCATC	722-742	733	2	-	32	0	-
-	-	BnaCnng12090D	bna-MIR6028-p3	TGAATGTCTTTCTCTTCATC	1655-1673	1665	2	-	81	0	-
-	-	BnaC06g06860D	PC-3p-2	AGACTCAGACTCAGCCGCAGCCGC	553-576	567	2	-	65	0	-
-	-	BnaCnng44050D	PC-3p-17	GAGATATGAAGTTGGGTTT	847-864	856	2	-	32	0	-
-	-	BnaA06g26880D	PC-3p-43	TGTATTTCCTCGGAATTGCCT	9114-9134	9125	4	2	16	40	-1.32
-	-	BnaC07g30080D	PC-3p-43	TGTATTTCCTCGGAATTGCCT	8535-8555	8546	4	2	16	40	-1.32
-	-	BnaA06g15330D	PC-3p-144	GCAAGTCGTCCTTGGCTATT	1520-1538	1529	2	2	290	404	-0.48
-	-	BnaC05g16910D	PC-3p-144	GCAAGTCGTCCTTGGCTATT	1541-1559	1550	2	2	129	81	0.67
-	-	BnaC08g25010D	PC-5p-4	AAACCGTCTGTTAACTTTTAACTA	842-865	856	4	2	32	81	-1.34**
-	-	BnaC07g17880D	PC-5p-100	GTTCCGACGGAAAATGAATTCCTC	328-351	342	2	4	16	10	0.68
-	-		PC-5p-135	GTTCCGACGGAAAATGAATTCTT	329-351
-	-	BnaC09g30070D	PC-5p-100	GTTCCGACGGAAAATGAATTCCTC	1154-1177	1168	2	4	16	10	0.68
-	-		PC-5p-135	GTTCCGACGGAAAATGAATTCTT	1155-1177
-	-	BnaAnng10200D	PC-5p-132	GGGTCCTTAATCGTAGGGTC	826-846	837	2	2	65	81	-0.32
-	-	BnaCnng58260D	PC-5p-132	GGGTCCTTAATCGTAGGGTC	843-863	854	2	2	65	81	-0.32
[1]Symbol	The symbol of gene annotation
[2]Name	Name regulation following Additional file 3: Table S3 and Additional file 5: Table S5
[3]Score	Alignment score
[4]Range	Alignment range
[5]Category	Degradome cleavage cateory
[6]TPB	Targets per billion = targets count*1.00E+09/total count
[7]Log2 Ratio	Log2 (WA TPB/TG TPB); ** indicates highly significant variation (p-value < 0.01 in both Chi-square 2×2 & Fisher-exact test and |log2(WA TPB/TG TPB)| ≥ 1) between the WA and TG degradome libraries.
